# Supplementary material for: Detection of Rare Germline Variants in the Genomes of B Cell Neoplasms
Source: Preprints.org preprint supplement (doi:10.20944/preprints202101.0330.v1), 2021-01-18
Supplement: Supplementary file 1 [file supplementary]

## Sheet: Sheet1
CHROM	POS	ID	REF	ALT	QUAL	FILTER	N_CASES	CASE_ID	TYPE	GENE	ExonicFunc.refGene	COSMIC_ID	COSMIC_DIS	ClinVar_SIG	ClinVar_DIS	ClinVar_ID	ClinVar_DB	ClinVar_DBID	X1000G_ALL	X1000G_AFR	X1000G_AMR	X1000G_EAS	X1000G_EUR	X1000G_SAS	ExAC_Freq	ExAC_AFR	ExAC_AMR	ExAC_EAS	ExAC_FIN	ExAC_NFE	ExAC_OTH	ExAC_SAS	ESP6500si_ALL	ESP6500si_AA	ESP6500si_EA	CG46	NCI60	gnomAD_exome_ALL	gnomAD_exome_AFR	gnomAD_exome_AMR	gnomAD_exome_ASJ	gnomAD_exome_EAS	gnomAD_exome_FIN	gnomAD_exome_NFE	gnomAD_exome_OTH	gnomAD_exome_SAS	gnomAD_genome_ALL	gnomAD_genome_AFR	gnomAD_genome_AMR
1	3322211	.	A	G	419	PASS	1	509	1	PRDM16	nonsynonymous SNV	.	.	.	.	.	.	.	.	.	.	.	.	.	.	.	.	.	.	.	.	.	.	.	.	.	.	.	.	.	.	.	.	.	.	.	.	.	.
1	3328571	.	T	C	282.9	PASS	1	797	1	PRDM16	nonsynonymous SNV	.	.	.	.	.	.	.	.	.	.	.	.	.	.	.	.	.	.	.	.	.	.	.	.	.	.	.	.	.	.	.	.	.	.	.	.	.	.
1	3342270	.	A	G	493.2	PASS	1	875	1	PRDM16	nonsynonymous SNV	.	.	.	.	.	.	.	.	.	.	.	.	.	.	.	.	.	.	.	.	.	.	.	.	.	.	.	.	.	.	.	.	.	.	.	.	.	.
1	3342278	.	C	T	473.1	PASS	1	298	1	PRDM16	nonsynonymous SNV	.	.	.	.	.	.	.	.	.	.	.	.	.	.	.	.	.	.	.	.	.	.	.	.	.	.	.	.	.	.	.	.	.	.	.	.	.	.
1	7151427	.	A	G	614.5	PASS	1	4131213	1	CAMTA1	nonsynonymous SNV	.	.	.	.	.	.	.	.	.	.	.	.	.	.	.	.	.	.	.	.	.	.	.	.	.	.	.	.	.	.	.	.	.	.	.	.	.	.
1	7724727	rs141259598	C	G	319.9	PASS	1	1228	1	CAMTA1	nonsynonymous SNV	.	.	.	.	.	.	.	0.0008	0.0008	.	.	0.003	.	0.0007	0.0004	0.0004	0	0.0003	0.001	0.0034	0	0.001	0.0002	0.0014	.	.	0.0006	0.0003	0.0006	0.0001	0	0.0002	0.0011	0.0009	0	0.0005	0.0001	0
1	7798255	.	G	A	673.2	PASS	1	361	1	CAMTA1	nonsynonymous SNV	.	.	.	.	.	.	.	.	.	.	.	.	.	.	.	.	.	.	.	.	.	.	.	.	.	.	.	.	.	.	.	.	.	.	.	.	.	.
1	7805943	.	C	A	490.3	PASS	1	83	1	CAMTA1	nonsynonymous SNV	.	.	.	.	.	.	.	.	.	.	.	.	.	.	.	.	.	.	.	.	.	.	.	.	.	.	.	.	.	.	.	.	.	.	.	.	.	.
1	8073700	rs151045316	G	A	1195.9	PASS	1	20	1	ERRFI1	nonsynonymous SNV	.	.	.	.	.	.	.	0.0002	.	.	.	0.001	.	0.0003	0.0002	0	0	0	0.0004	0	0.0002	0.0005	0.0002	0.0006	.	.	0.0003	0.0001	0.0002	0	0	0	0.0005	0	0.0002	0.0004	0.0002	0.0012
1	11227549	.	C	G	692.3	PASS	1	4128435	1	MTOR	nonsynonymous SNV	.	.	.	.	.	.	.	.	.	.	.	.	.	.	.	.	.	.	.	.	.	.	.	.	.	.	.	.	.	.	.	.	.	.	.	.	.	.
1	11297958	rs566273004	C	T	570	PASS	1	584	1	MTOR	nonsynonymous SNV	COSM1294735	1(urinary_tract)	.	.	.	.	.	0.0002	.	.	0.001	.	.	8.33e-06	0	0	0.0001	0	0	0	0	.	.	.	.	.	1.63e-05	0	2.98e-05	0	0.0001	0	9.02e-06	0	0	.	.	.
1	14105837	rs781259901	G	A	349	PASS	1	772	1	PRDM2	nonsynonymous SNV	.	.	.	.	.	.	.	.	.	.	.	.	.	.	.	.	.	.	.	.	.	.	.	.	.	.	.	.	.	.	.	.	.	.	.	.	.	.
1	14106104	.	T	A	321	PASS	1	317	1	PRDM2	nonsynonymous SNV	.	.	.	.	.	.	.	.	.	.	.	.	.	.	.	.	.	.	.	.	.	.	.	.	.	.	.	.	.	.	.	.	.	.	.	.	.	.
1	14107094	rs1409179904	C	T	494	PASS	1	52	1	PRDM2	nonsynonymous SNV	.	.	.	.	.	.	.	.	.	.	.	.	.	.	.	.	.	.	.	.	.	.	.	.	.	.	.	.	.	.	.	.	.	.	.	.	.	.
1	14107289	.	C	A	579.8	PASS	1	654	1	PRDM2	nonsynonymous SNV	.	.	.	.	.	.	.	.	.	.	.	.	.	.	.	.	.	.	.	.	.	.	.	.	.	.	.	.	.	.	.	.	.	.	.	.	.	.
1	14107658	rs148047054	A	T	526.6	PASS	1	4179976	1	PRDM2	nonsynonymous SNV	.	.	.	.	.	.	.	0.0006	.	.	.	0.002	0.001	0.0014	0	0.0002	0	0.0006	0.0019	0.0033	0.0019	0.0012	.	0.0017	.	0.016	0.0013	0.0001	0.0006	0.0004	5.8e-05	0.0007	0.0018	0.0009	0.0019	0.0015	0	0.0012
1	14109227	.	G	C	1009.2	PASS	1	361	1	PRDM2	nonsynonymous SNV	.	.	.	.	.	.	.	.	.	.	.	.	.	.	.	.	.	.	.	.	.	.	.	.	.	.	.	.	.	.	.	.	.	.	.	.	.	.
1	15832495	rs146054764	T	G	395.5	PASS	2	4151471;4180106	1,1	CASP9	nonsynonymous SNV	.	.	.	.	.	.	.	0.0002	0.0008	.	.	.	.	0.0015	0.0009	0.0002	0	0.0035	0.0022	0.0011	0	0.0018	0.0011	0.0022	.	.	0.0014	0.0007	0.0001	0.001	0	0.0039	0.002	0.0011	0	0.0015	0.0009	0.0012
1	15833555	rs145118493	T	C	366	PASS	3	880;477;4163297	1,1,1	CASP9	nonsynonymous SNV	.	.	.	.	.	.	.	0.0004	.	0.0029	.	.	.	0.001	0.0005	0.002	0	0.0003	0.0013	0.0011	0	0.0011	0.0005	0.0014	.	.	0.0009	0.0003	0.0014	0.0005	0	8.97e-05	0.0014	0.0009	3.25e-05	0.0007	0.0002	0.0024
1	15844763	rs535165327	G	A	1497.9	PASS	1	345	1	CASP9	nonsynonymous SNV	COSM243493	1(prostate)	.	.	.	.	.	0.0002	.	.	.	.	0.001	8.24e-06	0	0	0.0001	0	0	0	0	.	.	.	.	.	8.12e-06	0	2.98e-05	0	5.8e-05	0	0	0	0	.	.	.
1	15844883	.	C	A	445.2	PASS	1	4133263	1	CASP9	nonsynonymous SNV	.	.	.	.	.	.	.	.	.	.	.	.	.	.	.	.	.	.	.	.	.	.	.	.	.	.	.	.	.	.	.	.	.	.	.	.	.	.
1	16200775	rs143263475	C	T	4131.1	PASS	4	131;1462;805;869	1,1,1,1	SPEN	nonsynonymous SNV
1	16235853	.	G	C	595.3	PASS	1	17	1	SPEN	nonsynonymous SNV	.	.	.	.	.	.	.	.	.	.	.	.	.	.	.	.	.	.	.	.	.	.	.	.	.	.	.	.	.	.	.	.	.	.	.	.	.	.
1	16254776	.	A	G	1264	PASS	1	361	1	SPEN	nonsynonymous SNV	.	.	.	.	.	.	.	.	.	.	.	.	.	.	.	.	.	.	.	.	.	.	.	.	.	.	.	.	.	.	.	.	.	.	.	.	.	.
1	16254883	rs1246693905	C	G	364.6	PASS	1	1078	1	SPEN	nonsynonymous SNV	.	.	.	.	.	.	.	.	.	.	.	.	.	.	.	.	.	.	.	.	.	.	.	.	.	.	.	.	.	.	.	.	.	.	.	.	.	.
1	16255086	rs181758065	G	A	246.4	PASS	1	1339	1	SPEN	nonsynonymous SNV	COSM1335786	1(large_intestine)	.	.	.	.	.	0.0006	.	0.0043	.	.	.	0.0002	0.0003	0.0003	0	0	0.0003	0	0	0.0002	.	0.0002	.	.	0.0002	0.0002	0.0004	0	0	0	0.0003	0.0005	0	6.46e-05	0	0
1	16256142	rs184914524	T	C	162.3	PASS	1	583	1	SPEN	nonsynonymous SNV	.	.	.	.	.	.	.	0.0004	.	0.0029	.	.	.	3.34e-05	0	0.0002	0	0	3.03e-05	0	0	.	.	.	.	.	2.85e-05	0	5.96e-05	0	0	0	8.98e-06	0.0007	0	.	.	.
1	16256265	.	G	T	476.9	PASS	1	4128355	1	SPEN	nonsynonymous SNV	.	.	.	.	.	.	.	.	.	.	.	.	.	.	.	.	.	.	.	.	.	.	.	.	.	.	.	.	.	.	.	.	.	.	.	.	.	.
1	16257159	rs141407539	G	A	257.9	PASS	1	4147968	1	SPEN	nonsynonymous SNV	COSM3740792	1(liver)	.	.	.	.	.	0.0002	.	.	.	0.001	.	0.0001	0	0	0	0	0.0002	0	6.06e-05	0.0003	0.0002	0.0003	.	.	0.0001	0	5.96e-05	0.0006	0	0	0.0002	0	3.25e-05	9.69e-05	0.0001	0
1	16261256	rs41269147	A	G	196.7	PASS	1	40	1	SPEN	nonsynonymous SNV	.	.	.	.	.	.	.	0.0002	.	.	.	0.001	.	0.0001	0	0.0003	0	0	0.0002	0	0	0.0002	.	0.0003	.	.	0.0002	6.54e-05	0.0001	0	5.8e-05	0	0.0003	0.0002	0	0.0001	0	0
1	16263971	.	T	C	933.6	PASS	1	664	1	SPEN	nonsynonymous SNV	.	.	.	.	.	.	.	.	.	.	.	.	.	.	.	.	.	.	.	.	.	.	.	.	.	.	.	.	.	.	.	.	.	.	.	.	.	.
1	16264022	rs41269153	G	C	626.1	PASS	2	830;841	1,1	SPEN	nonsynonymous SNV	.	.	.	.	.	.	.	0.0006	.	0.0014	.	0.002	.	0.0016	0.0004	0.0012	0	0.0003	0.0026	0.0033	6.06e-05	0.0019	0.0007	0.0026	.	.	0.0016	0.0007	0.0013	0	0	0.0003	0.0029	0.0024	0.0001	0.0016	0.0005	0
1	17942592	.	A	C	917	PASS	1	794	1	ARHGEF10L	nonsynonymous SNV	.	.	.	.	.	.	.	.	.	.	.	.	.	.	.	.	.	.	.	.	.	.	.	.	.	.	.	.	.	.	.	.	.	.	.	.	.	.
1	17982492	.	T	C	481.1	PASS	1	4128435	1	ARHGEF10L	nonsynonymous SNV	.	.	.	.	.	.	.	.	.	.	.	.	.	.	.	.	.	.	.	.	.	.	.	.	.	.	.	.	.	.	.	.	.	.	.	.	.	.
1	18023427	.	T	G	287.2	PASS	1	331	1	ARHGEF10L	nonsynonymous SNV	.	.	.	.	.	.	.	.	.	.	.	.	.	.	.	.	.	.	.	.	.	.	.	.	.	.	.	.	.	.	.	.	.	.	.	.	.	.
1	18023606	rs375266292	C	T	232.9	PASS	2	1226;1468	1,1	ARHGEF10L	nonsynonymous SNV	.	.	.	.	.	.	.	0.0006	.	.	.	0.002	0.001	0.0006	0.0005	0.0003	0.0001	0	0.0005	0.0014	0.0015	.	.	.	.	.	0.0005	0.0003	0.0005	0	0.0001	0	0.0005	0.0006	0.0015	0.0003	0	0.0012
1	23885773	rs146163818	A	T	208.4	PASS	2	564;4147360	1,1	ID3	nonsynonymous SNV	.	.	.	.	.	.	.	0.0002	.	.	.	0.001	.	9.19e-05	0	8.66e-05	0	0	0.0002	0	0	0.0002	.	0.0002	.	.	0.0001	0	0.0002	0.0001	0	0	0.0002	0	0	9.7e-05	0	0
1	27023262	rs1394917679	G	A	253.7	PASS	1	861	1	ARID1A	nonsynonymous SNV	.	.	.	.	.	.	.	.	.	.	.	.	.	.	.	.	.	.	.	.	.	.	.	.	.	.	.	.	.	.	.	.	.	.	.	3.29e-05	0	0
1	27023550	rs1450841040	G	T	74.8	PASS	1	4109808	1	ARID1A	nonsynonymous SNV	.	.	.	.	.	.	.	.	.	.	.	.	.	.	.	.	.	.	.	.	.	.	.	.	.	.	.	.	.	.	.	.	.	.	.	.	.	.
1	27089693	.	G	A	448.6	PASS	1	1338	1	ARID1A	nonsynonymous SNV	.	.	.	.	.	.	.	.	.	.	.	.	.	.	.	.	.	.	.	.	.	.	.	.	.	.	.	.	.	.	.	.	.	.	.	.	.	.
1	27101022	rs369118235	A	G	151.2	PASS	2	052;853	1,1	ARID1A	nonsynonymous SNV	.	.	not provided	not_specified	RCV000120062.1	MedGen	CN169374	0.0004	0.0008	.	.	0.001	.	0.0001	0.0004	0.0007	0	0	3.02e-05	0	0	0.0002	0.0007	.	.	.	0.0001	0.0005	0.0005	0	0	0	4.49e-05	0	0	0.0003	0.001	0.0012
1	27102163	.	G	A	707.6	PASS	1	829	1	ARID1A	nonsynonymous SNV	.	.	.	.	.	.	.	.	.	.	.	.	.	.	.	.	.	.	.	.	.	.	.	.	.	.	.	.	.	.	.	.	.	.	.	.	.	.
1	27106106	rs41303631	G	A	1775	PASS	3	1543;383;397	1,1,1	ARID1A	nonsynonymous SNV	COSM5020791	1(soft_tissue);1(skin)	not provided	not_specified	RCV000120065.1	MedGen	CN169374	0.0004	.	.	.	0.002	.	0.0016	0.0005	0.0005	0	0.0015	0.0025	0.0011	0.0001	0.0022	0.0005	0.003	.	.	0.0016	0.0005	0.0006	0	0	0.0016	0.0027	0.0015	0.0003	0.0014	0.0007	0
1	32741626	.	CT	C	475.7	PASS	1	4182605	1	LCK	frameshift deletion
1	35653647	.	C	T	361.6	PASS	1	1416	1	SFPQ	nonsynonymous SNV	.	.	.	.	.	.	.	.	.	.	.	.	.	.	.	.	.	.	.	.	.	.	.	.	.	.	.	.	.	.	.	.	.	.	.	.	.	.
1	35653657	rs376430574	T	A	2242.6	PASS	1	386	1	SFPQ	nonsynonymous SNV	.	.	.	.	.	.	.	0.0002	.	.	.	0.001	.	4.12e-05	0	8.64e-05	0	0	5.99e-05	0	0	0.0001	.	0.0001	.	.	4.06e-05	0	0.0001	0	0	0	4.48e-05	0.0002	0	9.69e-05	0	0.0012
1	35657040	.	C	T	332.9	PASS	1	4146289	1	SFPQ	nonsynonymous SNV	.	.	.	.	.	.	.	.	.	.	.	.	.	.	.	.	.	.	.	.	.	.	.	.	.	.	.	.	.	.	.	.	.	.	.	.	.	.
1	36757052	rs41303413	G	A	523.4	PASS	1	82	1	THRAP3	nonsynonymous SNV	.	.	.	.	.	.	.	0.0004	.	.	.	0.002	.	0.0006	0.0002	0.0011	0	0	0.0009	0.0022	0.0001	0.0003	0.0002	0.0003	.	.	0.0007	0.0003	0.0009	0.0002	0	0	0.0011	0.0007	6.5e-05	0.0005	0.0002	0.0024
1	36762194	.	A	G	262.7	PASS	1	4151471	1	THRAP3	nonsynonymous SNV	.	.	.	.	.	.	.	.	.	.	.	.	.	.	.	.	.	.	.	.	.	.	.	.	.	.	.	.	.	.	.	.	.	.	.	.	.	.
1	36762350	rs144921703	A	G	1279.7	PASS	2	032;352	1,1	THRAP3	nonsynonymous SNV	.	.	.	.	.	.	.	0.0002	.	0.0014	.	.	.	0.0002	0	0.0002	0	0	0.0003	0	0	0.0002	.	0.0003	.	.	0.0002	0	0.0003	0	0	0	0.0003	0.0002	0	6.46e-05	0	0
1	36767197	rs200329766	C	T	214.2	PASS	1	4135278	1	THRAP3	nonsynonymous SNV	.	.	.	.	.	.	.	0.0002	.	.	0.001	.	.	8.25e-06	0	0	0.0001	0	0	0	0	.	.	.	.	.	4.06e-06	0	0	0	5.8e-05	0	0	0	0	.	.	.
1	36932365	.	C	T	842.5	PASS	1	114	1	CSF3R	nonsynonymous SNV	.	.	.	.	.	.	.	.	.	.	.	.	.	.	.	.	.	.	.	.	.	.	.	.	.	.	.	.	.	.	.	.	.	.	.	.	.	.
1	39317396	rs147181818	C	T	414.7	PASS	3	1437;025;477	1,1,1	RRAGC	nonsynonymous SNV	.	.	.	.	.	.	.	0.0004	.	0.0014	.	0.001	.	0.0002	9.65e-05	8.64e-05	0	0	0.0004	0	0	0.0004	0.0005	0.0003	0.011	.	0.0002	6.67e-05	0.0002	0	0	0	0.0003	0.0004	0	0.0002	0.0002	0.0012
1	39321510	rs541381163	T	C	509.5	PASS	1	4130194	1	RRAGC	nonsynonymous SNV	.	.	.	.	.	.	.	0.0002	0.0008	.	.	.	.	1.65e-05	9.62e-05	0	0	0.0002	0	0	0	.	.	.	.	.	1.22e-05	6.54e-05	0	0	0	4.49e-05	8.96e-06	0	0	.	.	.
1	39325281	.	G	A	48.2	PASS	1	1178	1	RRAGC	nonsynonymous SNV	.	.	.	.	.	.	.	.	.	.	.	.	.	.	.	.	.	.	.	.	.	.	.	.	.	.	.	.	.	.	.	.	.	.	.	.	.	.
1	40363345	.	G	A	342	PASS	1	4119279	1	MYCL	nonsynonymous SNV	.	.	.	.	.	.	.	.	.	.	.	.	.	.	.	.	.	.	.	.	.	.	.	.	.	.	.	.	.	.	.	.	.	.	.	.	.	.
1	43804305	rs28928907	G	C	172.6	PASS	1	4136702	1	MPL	nonsynonymous SNV	.	.	Pathogenic|not provided	Congenital_amegakaryocytic_thrombocytopenia|not_specified	RCV000015221.26|RCV000121539.1	MedGen:OMIM:Orphanet|MedGen	C1327915:604498:ORPHA3319|CN169374	0.0002	.	.	.	0.001	.	0.0005	0.0002	8.64e-05	0	0.0002	0.0008	0	0	0.0003	0.0002	0.0003	.	0.0082	0.0004	0.0001	5.96e-05	0.0001	0	0.0003	0.0007	0	0	0.0003	0.0001	0
1	45797157	rs144079536	G	T	316	PASS	1	857	1	MUTYH	nonsynonymous SNV	.	.	Uncertain significance\x2cUncertain significance|other|other|Uncertain significance	MYH-associated_polyposis\x2cnot_provided|Hereditary_cancer-predisposing_syndrome|MYH-associated_polyposis|not_specified	RCV000205972.2\x2cRCV000034669.1|RCV000115755.7|RCV000123143.6|RCV000212714.3	MedGen:OMIM:Orphanet\x2cMedGen|MedGen:SNOMED_CT|MedGen:OMIM:Orphanet|MedGen	C1837991:608456:ORPHA247798\x2cCN221809|C0027672:699346009|C1837991:608456:ORPHA247798|CN169374	0.0002	.	.	.	0.001	.	0.0006	0.0002	0.0005	0	0	0.0007	0.0011	0.001	0.0005	.	0.0007	.	.	0.0006	0.0001	0.0006	0.002	0	0	0.0006	0.0007	0.0009	0.0003	0.0001	0
1	45798475	rs34612342	T	C	891.3	PASS	2	886;4177175	1,1	MUTYH	nonsynonymous SNV	.	.	Pathogenic|Pathogenic|Pathogenic|Pathogenic|not provided|Pathogenic	MYH-associated_polyposis|Endometrial_carcinoma|not_provided|Hereditary_cancer-predisposing_syndrome|not_specified|Carcinoma_of_colon	RCV000005612.10|RCV000005613.2|RCV000079502.5|RCV000115766.8|RCV000121607.1|RCV000144631.1	MedGen:OMIM:Orphanet|MedGen:OMIM:SNOMED_CT|MedGen|MedGen:SNOMED_CT|MedGen|MedGen:OMIM:SNOMED_CT	C1837991:608456:ORPHA247798|C0476089:608089:254878006|CN221809|C0027672:699346009|CN169374|C0699790:114500:269533000	0.0002	.	0.0014	.	.	.	0.0016	0.0005	0.001	0	0.0023	0.0025	0	0	0.0022	0.0005	0.003	.	.	0.0015	0.0005	0.001	0.0001	0	0.0016	0.0025	0.002	3.25e-05	0.0015	0.0005	0
1	47717556	.	C	T	1069.7	PASS	1	821	1	STIL	nonsynonymous SNV	COSM5010544	1(kidney)	.	.	.	.	.	.	.	.	.	.	.	.	.	.	.	.	.	.	.	.	.	.	.	.	.	.	.	.	.	.	.	.	.	.	.	.
1	47748129	rs149185431	G	A	2724.8	PASS	6	030;276;350;4147360;4179976;4182393	1,1,1,1,1,1	STIL	nonsynonymous SNV	COSM5020753	1(soft_tissue)	Uncertain significance|Uncertain significance	Primary_autosomal_recessive_microcephaly_7|not_specified	RCV000147679.1|RCV000174071.1	MedGen:OMIM|MedGen	C2675187:612703|CN169374	0.0006	.	.	.	0.003	.	0.0024	0.0009	0.0012	0	0.0002	0.0038	0.0022	0.0006	0.0029	0.0018	0.0035	.	0.0082	0.0022	0.0007	0.0019	0.0006	0	0.0003	0.0039	0.0022	0.0006	0.0022	0.0011	0.0024
1	51822440	.	T	G	565.4	PASS	1	854	1	EPS15	nonsynonymous SNV	.	.	.	.	.	.	.	.	.	.	.	.	.	.	.	.	.	.	.	.	.	.	.	.	.	.	.	.	.	.	.	.	.	.	.	.	.	.
1	51829550	.	G	A	798.5	PASS	1	881	1	EPS15	nonsynonymous SNV	.	.	.	.	.	.	.	.	.	.	.	.	.	.	.	.	.	.	.	.	.	.	.	.	.	.	.	.	.	.	.	.	.	.	.	.	.	.
1	51869200	.	C	G	262.4	PASS	1	4158268	1	EPS15	nonsynonymous SNV	.	.	.	.	.	.	.	.	.	.	.	.	.	.	.	.	.	.	.	.	.	.	.	.	.	.	.	.	.	.	.	.	.	.	.	.	.	.
1	65312368	rs149968614	C	T	434.8	PASS	1	814	1	JAK1	nonsynonymous SNV	.	.	not provided	not_specified	RCV000121231.1	MedGen	CN169374	0.001	0.0008	0.0014	.	0.003	.	0.0009	0.0002	0.0002	0	0.0003	0.0012	0	0.0014	0.0016	0.0009	0.002	.	.	0.0008	0.0005	0.0004	0.0008	5.8e-05	0.0001	0.0012	0.0005	0.0011	0.0008	0.0005	0.0012
1	65321324	rs61735631	G	A	522.3	PASS	2	4113140;4131213	1,1	JAK1	nonsynonymous SNV	.	.	not provided	not_specified	RCV000121230.1	MedGen	CN169374	0.0004	.	0.0014	.	0.001	.	0.0006	0	0.0002	0.0001	0.0008	0.001	0	0	0.001	.	0.0014	.	.	0.0007	0	0.0002	0.0008	5.8e-05	0.0004	0.0012	0.0009	3.25e-05	0.0013	0	0
1	85733329	rs1052221974	C	T	332.8	PASS	1	4173863	1	BCL10	nonsynonymous SNV	.	.	.	.	.	.	.	.	.	.	.	.	.	.	.	.	.	.	.	.	.	.	.	.	.	.	.	.	.	.	.	.	.	.	.	.	.	.
1	110882536	rs139502540	A	G	894.6	PASS	3	314;350;853	1,1,1	RBM15	nonsynonymous SNV	.	.	.	.	.	.	.	0.0002	0.0008	.	.	.	.	0.0013	0.0007	0.0008	0	0	0.0021	0.0011	0.0002	0.0016	0.0007	0.0021	.	.	0.0014	0.0007	0.0009	0.0099	0	0	0.0017	0.0027	9.75e-05	0.0009	0	0.0024
1	110884420	rs555751324	A	G	502.2	PASS	1	1181	1	RBM15	nonsynonymous SNV	.	.	.	.	.	.	.	0.0002	.	.	.	.	0.001	5.77e-05	0	0	0	0	0	0	0.0004	.	.	.	.	.	4.06e-05	0	0	0	0	0	0	0	0.0003	3.23e-05	0	0
1	110888159	.	A	T	2033.4	PASS	1	124	1	RBM15	splice_acceptor
1	116932163	.	C	A	228.9	PASS	1	4159421	1	ATP1A1	nonsynonymous SNV	.	.	.	.	.	.	.	.	.	.	.	.	.	.	.	.	.	.	.	.	.	.	.	.	.	.	.	.	.	.	.	.	.	.	.	.	.	.
1	116936189	.	C	A	197.9	PASS	1	4159421	1	ATP1A1	nonsynonymous SNV	.	.	.	.	.	.	.	.	.	.	.	.	.	.	.	.	.	.	.	.	.	.	.	.	.	.	.	.	.	.	.	.	.	.	.	.	.	.
1	116940565	.	C	G	78.8	PASS	1	4159421	1	ATP1A1	nonsynonymous SNV	.	.	.	.	.	.	.	.	.	.	.	.	.	.	.	.	.	.	.	.	.	.	.	.	.	.	.	.	.	.	.	.	.	.	.	.	.	.
1	116943573	.	T	A	321	PASS	1	4159421	1	ATP1A1	nonsynonymous SNV	.	.	.	.	.	.	.	.	.	.	.	.	.	.	.	.	.	.	.	.	.	.	.	.	.	.	.	.	.	.	.	.	.	.	.	.	.	.
1	116944228	.	C	T	328.1	PASS	1	4159421	1	ATP1A1	nonsynonymous SNV	.	.	.	.	.	.	.	.	.	.	.	.	.	.	.	.	.	.	.	.	.	.	.	.	.	.	.	.	.	.	.	.	.	.	.	.	.	.
1	120458660	.	G	C	270.7	PASS	1	769	1	NOTCH2	nonsynonymous SNV	.	.	.	.	.	.	.	.	.	.	.	.	.	.	.	.	.	.	.	.	.	.	.	.	.	.	.	.	.	.	.	.	.	.	.	.	.	.
1	120459251	rs143236410	G	T	868.3	PASS	3	1297;571;4132950	1,1,1	NOTCH2	nonsynonymous SNV	COSM1581340	1(haematopoietic_and_lymphoid_tissue);1(pancreas)	Benign	not_specified	RCV000318452.1	MedGen	CN169374	0.0002	.	0.0014	.	.	.	0.001	0.0005	0.0003	0.0001	0.0002	0.0013	0	0.0013	0.0016	0.0009	0.002	.	.	0.001	0.0003	0.0007	0	5.8e-05	0.0007	0.0015	0.0009	0.0012	0.0011	0.0002	0
1	120465364	rs116321057	C	T	279.5	PASS	1	4133263	1	NOTCH2	nonsynonymous SNV	.	.	Uncertain significance	not_specified	RCV000268720.1	MedGen	CN169374	0.0002	.	.	.	0.001	.	0.0004	0.0002	0.0002	0	0.0002	0.0007	0	0	0.001	0.0005	0.0013	.	0.0082	0.0006	0.0002	0.0004	0	0	8.97e-05	0.0011	0.0007	0	0.0012	0.0003	0
1	144909909	rs148375132	T	A	511.4	PASS	1	1257	1	PDE4DIP	nonsynonymous SNV	.	.	.	.	.	.	.	0.0004	0.0015	.	.	.	.	0.0002	0.0007	0	0	0.0009	0.0001	0	0	0.0002	0.0005	0.0001	.	.	0.0001	0.0004	0	0	0	0.0004	6.27e-05	0.0004	0	0.0002	0.0006	0
1	144946676	.	C	G	187.7	PASS	1	1459	1	PDE4DIP	nonsynonymous SNV
1	147084683	rs145723033	A	G	865.4	PASS	3	284;727;4121974	1,1,1	BCL9	nonsynonymous SNV	.	.	.	.	.	.	.	0.0002	.	.	.	.	0.001	0.001	0	0.0003	0	0.0011	0.0014	0	0.0007	0.0008	0.0002	0.0012	.	.	0.001	0	0.0007	0	0	0.0021	0.0012	0.0013	0.0008	0.0007	0.0001	0
1	147090797	.	C	G	484	PASS	1	754	1	BCL9	nonsynonymous SNV	.	.	.	.	.	.	.	.	.	.	.	.	.	.	.	.	.	.	.	.	.	.	.	.	.	.	.	.	.	.	.	.	.	.	.	.	.	.
1	147091662	rs587603499	CATG	C	1036.6	PASS	1	1298	1	BCL9	nonframeshift deletion	.	.	.	.	.	.	.	0.0014	0.0045	0.0014	.	.	.	0.0004	0.0039	0	0	0	9.04e-05	0	0	0.0016	0.0038	0.0005	.	.	0.0003	0.0043	0.0001	0	0	0	8.96e-05	0	0	0.0013	0.0046	0.0012
1	147092671	rs145145153	T	A	60.7	PASS	1	41	1	BCL9	nonsynonymous SNV	.	.	.	.	.	.	.	0.0002	.	0.0014	.	.	.	0.0005	9.61e-05	0.0006	0	0	0.0007	0.0022	0	0.0005	0.0002	0.0006	.	.	0.0005	6.53e-05	0.0003	0.0067	0	0	0.0003	0.0015	3.25e-05	0.0002	0	0
1	147094140	rs200473630	A	G	312.6	PASS	1	4133863	1	BCL9	nonsynonymous SNV	.	.	.	.	.	.	.	0.0004	0.0008	0.0014	.	.	.	5.77e-05	0.0006	8.64e-05	0	0	0	0	0	0.0002	0.0007	.	.	.	5.69e-05	0.0008	5.96e-05	0	0	0	0	0	0	0.0002	0.0006	0
1	147096153	rs113081863	G	A	418.3	PASS	1	4135099	1	BCL9	nonsynonymous SNV	COSM1235637	1(haematopoietic_and_lymphoid_tissue)	.	.	.	.	.	0.0002	.	.	.	0.001	.	0.0011	0.0002	0	0	0.0002	0.0019	0	0.0002	0.0015	0.0002	0.0022	.	.	0.0012	0.0002	0.0005	0	0	0.0002	0.0022	0.0013	0.0002	0.0008	0.0001	0
1	150550799	.	C	A	125.7	PASS	1	4159421	1	MCL1	nonsynonymous SNV	.	.	.	.	.	.	.	.	.	.	.	.	.	.	.	.	.	.	.	.	.	.	.	.	.	.	.	.	.	.	.	.	.	.	.	.	.	.
1	150785775	rs587733705	C	T	579.4	PASS	1	375	1	ARNT	nonsynonymous SNV	.	.	.	.	.	.	.	0.0002	.	.	.	.	0.001	2.48e-05	0	0	0.0001	0	0	0	0.0001	.	.	.	.	.	2.04e-05	0	0	0	0.0001	0	8.99e-06	0	6.53e-05	.	.	.
1	150789285	rs200208316	G	C	484.5	PASS	2	314;854	1,1	ARNT	nonsynonymous SNV	.	.	.	.	.	.	.	0.0006	.	0.0043	.	.	.	8.3e-05	0	0.0003	0	0	7.53e-05	0	0.0001	.	.	.	.	.	5.56e-05	0	0.0002	0	0	0	3.88e-05	0.0002	7.78e-05	.	.	.
1	150795736	.	G	A	968.7	PASS	1	725	1	ARNT	nonsynonymous SNV	.	.	.	.	.	.	.	.	.	.	.	.	.	.	.	.	.	.	.	.	.	.	.	.	.	.	.	.	.	.	.	.	.	.	.	.	.	.
1	150801618	.	A	C	402	PASS	1	4163639	1	ARNT	nonsynonymous SNV	.	.	.	.	.	.	.	.	.	.	.	.	.	.	.	.	.	.	.	.	.	.	.	.	.	.	.	.	.	.	.	.	.	.	.	.	.	.
1	150917623	rs587715611;rs755041728;rs587751384	TG	T,TGG	730.7	PASS	5	1346;150;658;762;868	1,1,1,1,1	SETDB1	frameshift insertion	COSM5348791	1(liver)	.	.	.	.	.	.	.	.	.	.	.	.	.	.	.	.	.	.	.	.	.	.	.	.	.	.	.	.	.	.	.	.	.	.	.	.
1	150923140	.	G	A	282.1	PASS	1	4136702	1	SETDB1	nonsynonymous SNV	.	.	.	.	.	.	.	.	.	.	.	.	.	.	.	.	.	.	.	.	.	.	.	.	.	.	.	.	.	.	.	.	.	.	.	.	.	.
1	150933468	rs113110991	C	T	1521.8	PASS	9	017;048;1100;1224;189;422;797;342;4168738	1,1,1,1,1,1,1,1,1	SETDB1	nonsynonymous SNV	.	.	.	.	.	.	.	0.0018	.	0.0043	.	0.002	0.0041	0.0024	0.0007	0.0014	0	0.0023	0.0026	0.0033	0.0048	0.002	0.0005	0.0028	.	.	0.0024	0.0006	0.001	0.0003	0	0.0019	0.0031	0.0016	0.0051	0.0022	0.0003	0
1	154148640	.	C	T	519.1	PASS	1	137	1	TPM3	nonsynonymous SNV	.	.	.	.	.	.	.	.	.	.	.	.	.	.	.	.	.	.	.	.	.	.	.	.	.	.	.	.	.	.	.	.	.	.	.	.	.	.
1	155205634	rs76763715	T	C	453.5	PASS	6	195;197;663;769;4139212;4177856	1,1,1,1,1,1	GBA	nonsynonymous SNV	.	.	Pathogenic|other|other|Pathogenic|Pathogenic|Pathogenic|Likely pathogenic|Likely pathogenic\x2cPathogenic	Gauchers_disease\x2c_type_1|Parkinson_disease\x2c_late-onset|Dementia\x2c_Lewy_body\x2c_susceptibility_to|not_provided|Susceptibility_to_Parkinsons_Disease|Gaucher_disease|Akinesia|Rigidity\x2cGaucher_disease	RCV000004515.10|RCV000004516.4|RCV000004517.4|RCV000079336.4|RCV000305321.1|RCV000396221.1|RCV000414782.1|RCV000414782.1\x2cRCV000020146.1	MedGen|MedGen|MedGen:Orphanet|Human_Phenotype_Ontology:MedGen|Human_Phenotype_Ontology:MedGen\x2cMedGen:Orphanet	CN221809|CN239381|C0017205:ORPHA355|HP:0002304:C0085623|HP:0002063:C0026837\x2cC0017205:ORPHA355	0.0006	.	0.0014	.	0.002	.	0.0022	0.0003	0.0011	0	0.0011	0.0036	0.0022	6.06e-05	0.0018	.	0.0028	.	.	0.0023	0.0002	0.0008	0.0271	0	0.0012	0.002	0.0036	3.25e-05	0.0017	0.0001	0.0036
1	156761535	.	T	A	270.9	PASS	1	90	1	PRCC	nonsynonymous SNV	.	.	.	.	.	.	.	.	.	.	.	.	.	.	.	.	.	.	.	.	.	.	.	.	.	.	.	.	.	.	.	.	.	.	.	.	.	.
1	156830742	rs201472270	C	T	448.8	PASS	2	4156551;4171586	1,1	NTRK1	nonsynonymous SNV	.	.	Uncertain significance|Uncertain significance	not_specified|Hereditary_insensitivity_to_pain_with_anhidrosis	RCV000220958.2|RCV000299635.1	MedGen|MedGen:OMIM:Orphanet:SNOMED_CT	CN169374|C0020074:256800:ORPHA642:62985007	0.0004	.	.	.	0.002	.	0.0031	0	0	0	.	0.0047	0	0.0028	.	.	.	.	.	0.0032	0.0014	0.001	0.0009	0	0.0064	0.0059	0.0015	0.0015	0.0037	0.0009	0.0012
1	156843439	rs137979116	C	A	389.5	PASS	2	4132950;4163297	1,1	NTRK1	nonsynonymous SNV	.	.	Uncertain significance|Uncertain significance	not_specified|Hereditary_insensitivity_to_pain_with_anhidrosis	RCV000236758.2|RCV000284934.1	MedGen|MedGen:OMIM:Orphanet:SNOMED_CT	CN169374|C0020074:256800:ORPHA642:62985007	0.0004	0.0008	.	.	0.001	.	0.0009	0.0003	0.0005	0	0.0006	0.0015	0.0013	0	0.0013	0.0002	0.0019	.	.	0.0009	0.0001	0.0005	0.0001	0	0.0003	0.0017	0.0011	0	0.0018	0.0003	0
1	156843710	.	T	C	389.2	PASS	1	4108627	1	NTRK1	nonsynonymous SNV	.	.	.	.	.	.	.	.	.	.	.	.	.	.	.	.	.	.	.	.	.	.	.	.	.	.	.	.	.	.	.	.	.	.	.	.	.	.
1	156844733	.	C	A	540.9	PASS	1	4176046	1	NTRK1	stopgain	.	.	.	.	.	.	.	.	.	.	.	.	.	.	.	.	.	.	.	.	.	.	.	.	.	.	.	.	.	.	.	.	.	.	.	.	.	.
1	157548296	.	A	G	512.3	PASS	1	1384	1	FCRL4	nonsynonymous SNV	.	.	.	.	.	.	.	.	.	.	.	.	.	.	.	.	.	.	.	.	.	.	.	.	.	.	.	.	.	.	.	.	.	.	.	.	.	.
1	157557721	rs145588032	G	A	544.6	PASS	1	4199714	1	FCRL4	stopgain	.	.	.	.	.	.	.	0.0002	0.0008	.	.	.	.	0.0001	0.0001	9.1e-05	0	0	0.0002	0	0	0.0002	.	0.0002	0.011	.	8.62e-05	6.57e-05	3e-05	0	0	0	0.0002	0.0002	0	3.23e-05	0.0001	0
1	162724631	rs371333028	C	T	261.6	PASS	1	775	1	DDR2	nonsynonymous SNV	COSM3689105;COSM3689104	1(large_intestine)	.	.	.	.	.	0.0002	.	.	.	.	0.001	5.79e-05	0	0.0002	0	0	3.01e-05	0	0.0002	0.0001	.	0.0001	.	.	4.9e-05	0	0.0002	0	0	0	1.81e-05	0	0.0001	.	.	.
1	162743311	.	C	T	1793.3	PASS	1	814	1	DDR2	nonsynonymous SNV	.	.	.	.	.	.	.	.	.	.	.	.	.	.	.	.	.	.	.	.	.	.	.	.	.	.	.	.	.	.	.	.	.	.	.	.	.	.
1	162745588	rs754868982	G	T	355	PASS	1	4128435	1	DDR2	nonsynonymous SNV	.	.	.	.	.	.	.	.	.	.	.	.	.	.	.	.	.	.	.	.	.	.	.	.	.	.	0	0	0	0	0	0	0	0	0	.	.	.
1	162748379	.	A	G	1070.1	PASS	1	117	1	DDR2	nonsynonymous SNV	.	.	.	.	.	.	.	.	.	.	.	.	.	.	.	.	.	.	.	.	.	.	.	.	.	.	.	.	.	.	.	.	.	.	.	.	.	.
1	167935880	rs146895084	G	A	1277.5	PASS	1	859	1	DCAF6	nonsynonymous SNV	.	.	.	.	.	.	.	0.0002	.	.	.	0.001	.	0.0003	0	8.64e-05	0	0	0.0005	0.0011	0	0.0002	.	0.0002	.	.	0.0003	0	0.0002	0	0	4.49e-05	0.0005	0.0002	0	0.0002	0.0001	0.0012
1	167962499	rs143999777	G	T	537.8	PASS	3	039;156;831	1,1,1	DCAF6	nonsynonymous SNV	.	.	.	.	.	.	.	0.001	.	0.0014	.	0.004	.	0.0024	0.0008	0.0007	0	0.0026	0.0034	0.0022	0.0014	0.0023	0.0016	0.0027	.	0.0082	0.0022	0.0005	0.0005	0	0	0.0035	0.0034	0.0011	0.0016	0.0025	0.0006	0.0012
1	170705246	.	C	G	475.2	PASS	1	56	1	PRRX1	nonsynonymous SNV	.	.	.	.	.	.	.	.	.	.	.	.	.	.	.	.	.	.	.	.	.	.	.	.	.	.	.	.	.	.	.	.	.	.	.	.	.	.
1	179077424	rs1049620714	A	T	257.9	PASS	1	197	1	ABL2	nonsynonymous SNV	.	.	.	.	.	.	.	.	.	.	.	.	.	.	.	.	.	.	.	.	.	.	.	.	.	.	.	.	.	.	.	.	.	.	.	.	.	.
1	179077709	rs558127546	C	T	584.1	PASS	2	1175;760	1,1	ABL2	nonsynonymous SNV	.	.	.	.	.	.	.	0.0002	.	.	.	0.001	.	3.3e-05	9.72e-05	0.0003	0	0	0	0	0	.	.	.	.	.	2.85e-05	6.54e-05	0.0002	0	0	0	0	0	0	6.47e-05	0.0001	0.0012
1	179078052	rs55892721	T	A	1731.1	PASS	3	070;302;4158933	1,1,1	ABL2	nonsynonymous SNV	.	.	.	.	.	.	.	0.0008	.	.	.	0.002	0.002	0.0031	0.0007	0.0016	0	0.0032	0.0045	0.0044	0.0018	0.0035	0.0005	0.0051	.	.	0.0034	0.0006	0.0018	0.0138	5.8e-05	0.0044	0.004	0.0035	0.0019	0.0026	0.0009	0
1	179079416	rs56004467	C	T	2368.6	PASS	1	812	1	ABL2	splice_donor
1	179079425	.	A	G	754.4	PASS	1	1444	1	ABL2	nonsynonymous SNV	.	.	.	.	.	.	.	.	.	.	.	.	.	.	.	.	.	.	.	.	.	.	.	.	.	.	.	.	.	.	.	.	.	.	.	.	.	.
1	186303528	rs200189169	G	C	370.8	PASS	1	278	1	TPR	nonsynonymous SNV	.	.	.	.	.	.	.	0.0004	.	.	.	0.002	.	0.0005	0.0001	0.001	0	0	0.0008	0.0022	0	0.0005	.	0.0007	.	0.0082	0.0005	0.0001	0.0008	0.0002	0	4.49e-05	0.0008	0.0007	0	0.0004	0.0001	0
1	186305747	rs35917803	C	A	1331	PASS	8	064;1484;361;381;442;654;727;4130003	1,1,1,1,1,1,1,1	TPR	nonsynonymous SNV	.	.	.	.	.	.	.	0.0002	.	.	.	0.001	.	0.0012	0.0004	0.0012	0	0	0.0017	0.0022	0.001	0.0017	0.0003	0.0023	.	.	0.0013	0.0003	0.0017	0.0008	0	4.49e-05	0.0018	0.0011	0.001	0.0009	0.0002	0.0024
1	186306168	.	T	A	503.6	PASS	1	4104105	1	TPR	nonsynonymous SNV	.	.	.	.	.	.	.	.	.	.	.	.	.	.	.	.	.	.	.	.	.	.	.	.	.	.	.	.	.	.	.	.	.	.	.	.	.	.
1	186308826	.	G	T	509.7	PASS	1	137	1	TPR	nonsynonymous SNV	COSM247960	1(prostate)	.	.	.	.	.	.	.	.	.	.	.	.	.	.	.	.	.	.	.	.	.	.	.	.	.	.	.	.	.	.	.	.	.	.	.	.
1	186316510	rs201054576	C	T	1548.2	PASS	1	586	1	TPR	nonsynonymous SNV	COSM2123090	1(large_intestine)	.	.	.	.	.	0.0002	.	.	.	0.001	.	0.0001	0	0	0	0	0.0002	0	0	0.0001	.	0.0001	.	.	0.0002	6.54e-05	0	0	0	4.49e-05	0.0003	0.0002	0	0.0002	0	0
1	186320484	.	T	C	529.8	PASS	1	1263	1	TPR	nonsynonymous SNV	.	.	.	.	.	.	.	.	.	.	.	.	.	.	.	.	.	.	.	.	.	.	.	.	.	.	.	.	.	.	.	.	.	.	.	.	.	.
1	186327777	.	A	C	1120.5	PASS	1	339	1	TPR	nonsynonymous SNV	.	.	.	.	.	.	.	.	.	.	.	.	.	.	.	.	.	.	.	.	.	.	.	.	.	.	.	.	.	.	.	.	.	.	.	.	.	.
1	186329119	.	C	T	511.7	PASS	1	4173863	1	TPR	nonsynonymous SNV	.	.	.	.	.	.	.	.	.	.	.	.	.	.	.	.	.	.	.	.	.	.	.	.	.	.	.	.	.	.	.	.	.	.	.	.	.	.
1	186330768	rs201760745	T	C	917.3	PASS	1	160	1	TPR	nonsynonymous SNV	.	.	.	.	.	.	.	0.0002	.	.	.	0.001	.	0.0003	0	8.69e-05	0	0	0.0005	0	6.06e-05	0.0002	.	0.0002	.	.	0.0003	6.55e-05	0.0002	0.0012	0	0	0.0004	0.0002	6.5e-05	0.0002	0	0.0012
1	186332066	rs186229244	T	G	690.7	PASS	3	566;862;1431	1,1,1	TPR	nonsynonymous SNV	.	.	.	.	.	.	.	0.0004	.	.	.	0.002	.	0.0012	0.0003	0.0035	0	0.0003	0.0014	0.0034	0	0.0007	0.0003	0.0009	.	.	0.0012	0.0003	0.003	0.0003	0	0.0003	0.0014	0.0026	0	0.0011	0.0002	0.0024
1	190067180	.	TTG	T	634.2	PASS	1	898	1	BRINP3	frameshift deletion
1	190234052	.	G	C	1105.5	PASS	1	654	1	BRINP3	nonsynonymous SNV	.	.	.	.	.	.	.	.	.	.	.	.	.	.	.	.	.	.	.	.	.	.	.	.	.	.	.	.	.	.	.	.	.	.	.	.	.	.
1	190423882	.	G	A	625.5	PASS	1	138	1	BRINP3	nonsynonymous SNV	.	.	.	.	.	.	.	.	.	.	.	.	.	.	.	.	.	.	.	.	.	.	.	.	.	.	.	.	.	.	.	.	.	.	.	.	.	.
1	198704265	.	G	A	224	PASS	1	758	1	PTPRC	nonsynonymous SNV	.	.	.	.	.	.	.	.	.	.	.	.	.	.	.	.	.	.	.	.	.	.	.	.	.	.	.	.	.	.	.	.	.	.	.	.	.	.
1	198717251	.	A	C	207.7	PASS	1	4159421	1	PTPRC	nonsynonymous SNV	.	.	.	.	.	.	.	.	.	.	.	.	.	.	.	.	.	.	.	.	.	.	.	.	.	.	.	.	.	.	.	.	.	.	.	.	.	.
1	198725086	.	A	G	374.3	PASS	1	1339	1	PTPRC	nonsynonymous SNV	.	.	.	.	.	.	.	.	.	.	.	.	.	.	.	.	.	.	.	.	.	.	.	.	.	.	.	.	.	.	.	.	.	.	.	.	.	.
1	204494703	rs148900701	C	G	197.1	PASS	1	1327	1	MDM4	nonsynonymous SNV	.	.	.	.	.	.	.	0.0002	.	.	.	0.001	.	9.06e-05	9.61e-05	0	0	0	0.0001	0	0	0.0001	.	0.0001	.	.	0.0001	6.59e-05	6.12e-05	0	0	9.16e-05	0.0002	0.0002	0	6.5e-05	0	0
1	204518437	rs201947927	C	T	1104.2	PASS	3	1179;159;727	1,1,1	MDM4	nonsynonymous SNV	COSM23543	1(liver);2(skin);1(upper_aerodigestive_tract)	.	.	.	.	.	0.0002	.	0.0014	.	.	.	5.77e-05	0	0.0002	0	0	7.49e-05	0	0	.	.	.	.	.	6.09e-05	0	0.0002	0	0	4.49e-05	7.16e-05	0	0	6.46e-05	0.0001	0
1	205628442	rs151018622	C	T	192.6	PASS	1	267	1	SLC45A3	nonsynonymous SNV	.	.	.	.	.	.	.	0.0008	.	0.0043	.	0.001	.	0.0008	9.62e-05	0.0016	0	0.0003	0.0009	0	0.0009	0.0005	.	0.0007	0.022	.	0.0009	0.0001	0.002	0.0018	0	0.0002	0.0009	0.0016	0.0009	0.0007	0.0003	0.0012
1	205632155	rs142713511	G	A	452.9	PASS	1	4142267	1	SLC45A3	nonsynonymous SNV	COSM902823	1(endometrium)	.	.	.	.	.	0.0002	.	.	.	0.001	.	0.0002	0.0002	0.0005	0	0	0.0002	0	0	0.0002	0.0002	0.0002	.	.	0.0002	0.0001	0.0004	0.0007	0	0	0.0001	0.0007	0	0.0001	0	0.0012
1	205633685	rs149769508	C	T	333	PASS	3	721;1464;4130194	1,1,1	SLC45A3	nonsynonymous SNV	.	.	.	.	.	.	.	0.0002	.	0.0014	.	.	.	0.0003	0	0.0002	0.0001	0.0003	0.0004	0.0011	6.06e-05	0.0004	.	0.0006	.	.	0.0002	0	0.0002	0	5.8e-05	0.0001	0.0003	0.0002	3.25e-05	0.0002	0	0
1	245027126	.	G	C	347.4	PASS	1	4162611	1	HNRNPU	nonsynonymous SNV	.	.	.	.	.	.	.	.	.	.	.	.	.	.	.	.	.	.	.	.	.	.	.	.	.	.	.	.	.	.	.	.	.	.	.	.	.	.
2	16082458	.	C	T	1188.1	PASS	1	149	1	MYCN	nonsynonymous SNV	.	.	.	.	.	.	.	.	.	.	.	.	.	.	.	.	.	.	.	.	.	.	.	.	.	.	.	.	.	.	.	.	.	.	.	.	.	.
2	24881577	rs369860118	C	G	621.5	PASS	1	1063	1	NCOA1	nonsynonymous SNV	.	.	.	.	.	.	.	.	.	.	.	.	.	.	.	.	.	.	.	.	.	.	.	.	.	.	.	.	.	.	.	.	.	.	.	.	.	.
2	24930055	rs142018995	A	T	556.7	PASS	2	567;4159170	1,1	NCOA1	nonsynonymous SNV	.	.	.	.	.	.	.	0.0006	.	0.0014	.	0.002	.	0.0011	0.0004	0.0033	0	0.0003	0.0013	0.0022	0	0.0009	.	0.0014	.	.	0.0011	0.0004	0.002	0	0	0.0002	0.0016	0.0037	0	0.0006	0.0003	0
2	24952629	.	C	T	465.8	PASS	1	4121621	1	NCOA1	nonsynonymous SNV	.	.	.	.	.	.	.	.	.	.	.	.	.	.	.	.	.	.	.	.	.	.	.	.	.	.	.	.	.	.	.	.	.	.	.	.	.	.
2	24985617	rs201252444	T	C	3325.3	PASS	3	1270;157;881	1,1,1	NCOA1	nonsynonymous SNV	.	.	.	.	.	.	.	0.0004	.	0.0014	.	0.001	.	9.06e-05	0	0.0007	0	0	4.5e-05	0	0	.	.	.	.	.	0.0002	0	0.0011	0.0001	0	0	5.37e-05	0.0002	0	0.0001	0	0.0024
2	25965535	rs202092276	T	A	397.3	PASS	1	1437	1	ASXL2	nonsynonymous SNV	.	.	.	.	.	.	.	0.0004	.	0.0014	.	0.001	.	0.0001	0.0001	0.0003	0	0	0.0001	0	0	0.0002	.	0.0004	.	.	0.0001	6.54e-05	0.0004	0	0	0	0.0002	0.0004	0	9.69e-05	0	0
2	25966354	.	G	A	1412.9	PASS	1	147	1	ASXL2	nonsynonymous SNV	.	.	.	.	.	.	.	.	.	.	.	.	.	.	.	.	.	.	.	.	.	.	.	.	.	.	.	.	.	.	.	.	.	.	.	.	.	.
2	25990452	.	T	C	2735.9	PASS	1	804	1	ASXL2	nonsynonymous SNV	.	.	.	.	.	.	.	.	.	.	.	.	.	.	.	.	.	.	.	.	.	.	.	.	.	.	.	.	.	.	.	.	.	.	.	.	.	.
2	25991719	.	G	T	1179.6	PASS	1	146	1	ASXL2	nonsynonymous SNV	.	.	.	.	.	.	.	.	.	.	.	.	.	.	.	.	.	.	.	.	.	.	.	.	.	.	.	.	.	.	.	.	.	.	.	.	.	.
2	26022390	rs912586455	A	T	2185.1	PASS	1	595	1	ASXL2	nonsynonymous SNV	.	.	.	.	.	.	.	.	.	.	.	.	.	.	.	.	.	.	.	.	.	.	.	.	.	.	.	.	.	.	.	.	.	.	.	.	.	.
2	29416170	rs370701220	C	CT	133.7	PASS	1	188	1	ALK	frameshift insertion	.	.	.	.	.	.	.	.	.	.	.	.	.	.	.	.	.	.	.	.	.	.	.	.	.	.	1.63e-05	0	0	0	5.8e-05	0.0001	0	0	0	.	.	.
2	29445238	.	C	G	346.7	PASS	1	4190316	1	ALK	nonsynonymous SNV	.	.	.	.	.	.	.	.	.	.	.	.	.	.	.	.	.	.	.	.	.	.	.	.	.	.	.	.	.	.	.	.	.	.	.	.	.	.
2	32605339	.	C	G	539.7	PASS	1	874	1	BIRC6	nonsynonymous SNV	.	.	.	.	.	.	.	.	.	.	.	.	.	.	.	.	.	.	.	.	.	.	.	.	.	.	.	.	.	.	.	.	.	.	.	.	.	.
2	32626684	.	G	A	507.6	PASS	1	4166940	1	BIRC6	nonsynonymous SNV	.	.	.	.	.	.	.	.	.	.	.	.	.	.	.	.	.	.	.	.	.	.	.	.	.	.	.	.	.	.	.	.	.	.	.	.	.	.
2	32640659	.	A	G	829.5	PASS	1	1459	1	BIRC6	nonsynonymous SNV	.	.	.	.	.	.	.	.	.	.	.	.	.	.	.	.	.	.	.	.	.	.	.	.	.	.	.	.	.	.	.	.	.	.	.	.	.	.
2	32656154	rs201321733	G	A	527.2	PASS	1	4113825	1	BIRC6	nonsynonymous SNV	.	.	.	.	.	.	.	0.0002	.	.	.	0.001	.	0.0002	0	0	0.0003	0.0002	0.0002	0	0.0003	0.0001	.	0.0001	.	.	0.0001	0	0	0	0.0005	4.52e-05	0.0001	0	0.0004	0.0001	0	0
2	32667393	rs79589157	T	C	2372.6	PASS	3	051;1203;149	1,1,1	BIRC6	nonsynonymous SNV	.	.	.	.	.	.	.	0.0008	.	0.0014	.	0.003	.	0.0007	0.0003	0.0026	0	0	0.0007	0.0024	0	0.0004	.	0.0006	0.011	.	0.0008	0.0002	0.0031	0	0	0	0.0007	0.0009	0	0.0004	0.0002	0.0036
2	32688363	.	T	C	1618.6	PASS	1	813	1	BIRC6	nonsynonymous SNV	.	.	.	.	.	.	.	.	.	.	.	.	.	.	.	.	.	.	.	.	.	.	.	.	.	.	.	.	.	.	.	.	.	.	.	.	.	.
2	32692685	rs61754133	A	G	503.9	PASS	1	4113191	1	BIRC6	nonsynonymous SNV	.	.	.	.	.	.	.	0.0004	0.0015	.	.	.	.	0.0003	0.0004	0.0003	0	0	0.0003	0	0.0001	0.0005	0.0002	0.0006	.	.	0.0003	0.0003	0.0002	0	5.8e-05	4.48e-05	0.0004	0.0005	0.0002	0.0004	0.0002	0.0012
2	32718640	.	T	C	907.5	PASS	1	4123945	1	BIRC6	nonsynonymous SNV	.	.	.	.	.	.	.	.	.	.	.	.	.	.	.	.	.	.	.	.	.	.	.	.	.	.	.	.	.	.	.	.	.	.	.	.	.	.
2	32724850	.	G	C	548.7	PASS	1	134	1	BIRC6	nonsynonymous SNV	.	.	.	.	.	.	.	.	.	.	.	.	.	.	.	.	.	.	.	.	.	.	.	.	.	.	.	.	.	.	.	.	.	.	.	.	.	.
2	32728142	.	C	G	489	PASS	1	1567	1	BIRC6	nonsynonymous SNV	.	.	.	.	.	.	.	.	.	.	.	.	.	.	.	.	.	.	.	.	.	.	.	.	.	.	.	.	.	.	.	.	.	.	.	.	.	.
2	32733170	.	C	T	630.6	PASS	1	1311	1	BIRC6	nonsynonymous SNV	.	.	.	.	.	.	.	.	.	.	.	.	.	.	.	.	.	.	.	.	.	.	.	.	.	.	.	.	.	.	.	.	.	.	.	.	.	.
2	32740353	rs61757638	C	T	6074.8	PASS	7	011;114;1184;1226;159;352;422	1,1,1,1,1,1,1	BIRC6	nonsynonymous SNV	.	.	.	.	.	.	.	0.0008	.	0.0029	.	0.002	.	0.0018	0.0007	0.0007	0	0.0002	0.003	0.0011	6.06e-05	0.0022	0.0011	0.0028	.	.	0.0016	0.0005	0.0007	0.0001	0	0.0004	0.0031	0.0013	6.5e-05	0.0017	0.0005	0.0012
2	32756425	.	A	T	2082.1	PASS	1	278	1	BIRC6	nonsynonymous SNV	.	.	.	.	.	.	.	.	.	.	.	.	.	.	.	.	.	.	.	.	.	.	.	.	.	.	.	.	.	.	.	.	.	.	.	.	.	.
2	32768467	rs199654826	T	A	872.6	PASS	1	4158769	1	BIRC6	nonsynonymous SNV	.	.	.	.	.	.	.	0.0002	.	0.0014	.	.	.	0.0005	0	8.64e-05	0	0.0003	0.0009	0	0	0.0002	.	0.0002	.	.	0.0004	0	5.96e-05	0	0	0.0004	0.0008	0	0	0.0005	0	0
2	32770927	.	G	T	432.4	PASS	1	715	1	BIRC6	nonsynonymous SNV	.	.	.	.	.	.	.	.	.	.	.	.	.	.	.	.	.	.	.	.	.	.	.	.	.	.	.	.	.	.	.	.	.	.	.	.	.	.
2	32774425	.	G	A	2416.5	PASS	1	1221	1	BIRC6	nonsynonymous SNV	.	.	.	.	.	.	.	.	.	.	.	.	.	.	.	.	.	.	.	.	.	.	.	.	.	.	.	.	.	.	.	.	.	.	.	.	.	.
2	37078233	rs151101479	G	T	510.1	PASS	1	4133863	1	STRN	nonsynonymous SNV	.	.	.	.	.	.	.	0.0012	0.0045	.	.	.	.	0.0004	0.0048	0	0	0	0	0	0	0.0014	0.0041	.	.	.	0.0003	0.0039	0.0003	0	0	0	9e-06	0	0	0.0014	0.0045	0.0012
2	37111123	.	G	T	706.3	PASS	1	158	1	STRN	nonsynonymous SNV	.	.	.	.	.	.	.	.	.	.	.	.	.	.	.	.	.	.	.	.	.	.	.	.	.	.	.	.	.	.	.	.	.	.	.	.	.	.
2	39212969	.	G	T	910	PASS	1	784	1	SOS1	nonsynonymous SNV	.	.	.	.	.	.	.	.	.	.	.	.	.	.	.	.	.	.	.	.	.	.	.	.	.	.	.	.	.	.	.	.	.	.	.	.	.	.
2	39262418	.	A	G	547.3	PASS	1	4100314	1	SOS1	nonsynonymous SNV	.	.	.	.	.	.	.	.	.	.	.	.	.	.	.	.	.	.	.	.	.	.	.	.	.	.	.	.	.	.	.	.	.	.	.	.	.	.
2	39283965	.	T	C	1259.3	PASS	1	1471	1	SOS1	nonsynonymous SNV	.	.	.	.	.	.	.	.	.	.	.	.	.	.	.	.	.	.	.	.	.	.	.	.	.	.	.	.	.	.	.	.	.	.	.	.	.	.
2	42490412	rs200273713	A	C	191.9	PASS	1	272	1	EML4	nonsynonymous SNV	.	.	.	.	.	.	.	0.0002	.	0.0014	.	.	.	1.67e-05	0	0.0002	0	0	0	0	0	.	.	.	.	.	8.99e-05	0	0.0006	0	0	0	0	0.0002	0	.	.	.
2	42515451	rs143932826	G	A	1408.3	PASS	2	341;473	1,1	EML4	nonsynonymous SNV	.	.	.	.	.	.	.	0.0008	.	.	.	.	0.0041	0.0011	0.0002	0.0003	0	0	0.0011	0	0.0033	0.0008	0.0002	0.001	.	.	0.001	0.0003	0.0004	0.0001	0	9.38e-05	0.0012	0.0008	0.0033	0.0008	0.0003	0
2	42522269	.	C	G	506.3	PASS	2	4103570;4125240	1,1	EML4	nonsynonymous SNV	.	.	.	.	.	.	.	.	.	.	.	.	.	.	.	.	.	.	.	.	.	.	.	.	.	.	.	.	.	.	.	.	.	.	.	.	.	.
2	42522311	rs777749257	C	A	727.3	PASS	1	862	1	EML4	nonsynonymous SNV	.	.	.	.	.	.	.	.	.	.	.	.	.	.	.	.	.	.	.	.	.	.	.	.	.	.	.	.	.	.	.	.	.	.	.	.	.	.
2	42552658	rs538096882	A	G	287.8	PASS	1	475	1	EML4	nonsynonymous SNV	.	.	.	.	.	.	.	0.0002	.	.	.	0.001	.	2.75e-05	0	0	0	0	5.44e-05	0	0	.	.	.	.	.	1.71e-05	0	0	0	0	0	3.82e-05	0	0	.	.	.
2	42553315	rs34894922	A	G	1090.6	PASS	1	1196	1	EML4	nonsynonymous SNV	.	.	.	.	.	.	.	0.0004	.	0.0014	.	.	0.001	0.0002	0	0.0006	0	0	0.0002	0	0.0004	0.0003	.	0.0005	.	.	0.0003	0	0.0005	0.0036	0	0	5.38e-05	0.0004	0.0003	6.46e-05	0	0.0012
2	45233463	rs147806994	G	A	362.3	PASS	2	4148771;4177175	1,1	SIX2	nonsynonymous SNV	.	.	.	.	.	.	.	0.0006	.	.	.	0.002	0.001	0.002	0.0011	0.0003	0	0.0032	0.0027	0.0033	0.0014	0.0019	0.0005	0.0027	.	.	0.002	0.0007	0.0003	0.0003	0	0.0044	0.0028	0.0022	0.0018	0.004	0.0006	0
2	46607742	.	C	T	357.9	PASS	1	1192	1	EPAS1	nonsynonymous SNV	.	.	.	.	.	.	.	.	.	.	.	.	.	.	.	.	.	.	.	.	.	.	.	.	.	.	.	.	.	.	.	.	.	.	.	.	.	.
2	46608778	.	C	G	210.9	PASS	1	4108988	1	EPAS1	nonsynonymous SNV	.	.	.	.	.	.	.	.	.	.	.	.	.	.	.	.	.	.	.	.	.	.	.	.	.	.	.	.	.	.	.	.	.	.	.	.	.	.
2	47606096	rs542435897	A	T	988.8	PASS	1	829	1	EPCAM	nonsynonymous SNV	.	.	.	.	.	.	.	0.0002	.	.	.	0.001	.	8.33e-06	0	0	0	0	1.51e-05	0	0	.	.	.	.	.	4.07e-06	0	0	0	0	0	8.97e-06	0	0	3.23e-05	0	0
2	47613735	.	A	T	448.1	PASS	1	1364	1	EPCAM	nonsynonymous SNV	.	.	.	.	.	.	.	.	.	.	.	.	.	.	.	.	.	.	.	.	.	.	.	.	.	.	.	.	.	.	.	.	.	.	.	.	.	.
2	48027580	.	A	G	439	PASS	1	4187640	1	MSH6	nonsynonymous SNV	.	.	.	.	.	.	.	.	.	.	.	.	.	.	.	.	.	.	.	.	.	.	.	.	.	.	.	.	.	.	.	.	.	.	.	.	.	.
2	48033423	rs147453999	A	T	493	PASS	1	53	1	MSH6	nonsynonymous SNV	.	.	Uncertain significance|other|Uncertain significance	Hereditary_cancer-predisposing_syndrome|Lynch_syndrome|not_specified	RCV000115419.6|RCV000122966.4|RCV000212687.2	MedGen:SNOMED_CT|MedGen:Orphanet:SNOMED_CT|MedGen	C0027672:699346009|C1333990:ORPHA144:315058005|CN169374	0.0002	.	.	.	.	0.001	0.0003	0	0.0003	0	0	0.0002	0	0.0012	0.0002	.	0.0002	.	.	0.0003	0	0.0005	0	0	0	0.0001	0.0011	0.0011	0.0002	0	0.0036
2	48033741	.	A	T	545.5	PASS	1	4109808	1	MSH6	stopgain	.	.	.	.	.	.	.	.	.	.	.	.	.	.	.	.	.	.	.	.	.	.	.	.	.	.	.	.	.	.	.	.	.	.	.	.	.	.
2	48033995	.	T	C	433.5	PASS	1	1181	1	MSH6	nonsynonymous SNV	.	.	.	.	.	.	.	.	.	.	.	.	.	.	.	.	.	.	.	.	.	.	.	.	.	.	.	.	.	.	.	.	.	.	.	.	.	.
2	48059947	.	G	T	445.3	PASS	1	179	1	FBXO11	nonsynonymous SNV	.	.	.	.	.	.	.	.	.	.	.	.	.	.	.	.	.	.	.	.	.	.	.	.	.	.	.	.	.	.	.	.	.	.	.	.	.	.
2	48066142	.	G	A	477.3	PASS	1	4145528	1	FBXO11	nonsynonymous SNV	.	.	.	.	.	.	.	.	.	.	.	.	.	.	.	.	.	.	.	.	.	.	.	.	.	.	.	.	.	.	.	.	.	.	.	.	.	.
2	61753571	.	T	C	1639.7	PASS	1	190	1	XPO1	nonsynonymous SNV	.	.	.	.	.	.	.	.	.	.	.	.	.	.	.	.	.	.	.	.	.	.	.	.	.	.	.	.	.	.	.	.	.	.	.	.	.	.
2	70315126	rs148864700	A	G	1599.7	PASS	1	689	1	PCBP1	nonsynonymous SNV	.	.	.	.	.	.	.	0.001	.	0.0029	0.001	0.002	.	0.0008	0.0004	0.0017	0.0001	0	0.0011	0	0.0002	0.0008	0.0002	0.001	0.011	.	0.0008	0.0004	0.0009	0	5.8e-05	0	0.0012	0.0026	0.0005	0.0005	0.0002	0
2	79878765	.	T	G	147.6	PASS	1	193	1	CTNNA2	nonsynonymous SNV	.	.	.	.	.	.	.	.	.	.	.	.	.	.	.	.	.	.	.	.	.	.	.	.	.	.	.	.	.	.	.	.	.	.	.	.	.	.
2	80101355	.	G	T	521.7	PASS	1	887	1	CTNNA2	nonsynonymous SNV	.	.	.	.	.	.	.	.	.	.	.	.	.	.	.	.	.	.	.	.	.	.	.	.	.	.	.	.	.	.	.	.	.	.	.	.	.	.
2	80782869	.	G	A	154.7	PASS	1	4133511	1	CTNNA2	nonsynonymous SNV	.	.	.	.	.	.	.	.	.	.	.	.	.	.	.	.	.	.	.	.	.	.	.	.	.	.	.	.	.	.	.	.	.	.	.	.	.	.
2	85273237	.	G	T	188.8	PASS	1	25	1	KCMF1	nonsynonymous SNV	.	.	.	.	.	.	.	.	.	.	.	.	.	.	.	.	.	.	.	.	.	.	.	.	.	.	.	.	.	.	.	.	.	.	.	.	.	.
2	85276747	.	A	G	587.4	PASS	1	4118156	1	KCMF1	nonsynonymous SNV	.	.	.	.	.	.	.	.	.	.	.	.	.	.	.	.	.	.	.	.	.	.	.	.	.	.	.	.	.	.	.	.	.	.	.	.	.	.
2	96810009	.	A	C	378	PASS	1	4177810	1	DUSP2	nonsynonymous SNV	.	.	.	.	.	.	.	.	.	.	.	.	.	.	.	.	.	.	.	.	.	.	.	.	.	.	.	.	.	.	.	.	.	.	.	.	.	.
2	100170775	rs151104269	C	T	490.4	PASS	2	4164943;4180106	1,1	AFF3	nonsynonymous SNV	COSM5649364	1(oesophagus)	.	.	.	.	.	0.0012	.	.	.	0.002	0.0041	0.0006	0.0002	8.64e-05	0.0003	0	0.0006	0.0011	0.0018	0.0007	0.0005	0.0008	.	.	0.0005	0.0001	0.0001	0.0001	0.0001	0	0.0005	0.0009	0.0015	0.0009	0.0005	0
2	100210696	.	T	C	3335	PASS	1	804	1	AFF3	nonsynonymous SNV	.	.	.	.	.	.	.	.	.	.	.	.	.	.	.	.	.	.	.	.	.	.	.	.	.	.	.	.	.	.	.	.	.	.	.	.	.	.
2	102476184	.	T	A	400.4	PASS	1	4139696	1	MAP4K4	nonsynonymous SNV	.	.	.	.	.	.	.	.	.	.	.	.	.	.	.	.	.	.	.	.	.	.	.	.	.	.	.	.	.	.	.	.	.	.	.	.	.	.
2	102481428	rs56048147	T	A	326.1	PASS	1	144	1	MAP4K4	nonsynonymous SNV	.	.	.	.	.	.	.	0.0002	.	0.0014	.	.	.	0.0003	0.0004	0.0011	0	0	0.0005	0	0	0.0001	.	0.0001	0.011	.	0.0002	0	0.0003	0.0001	0	0	0.0002	0.0009	7.95e-05	0.0002	0.0001	0
2	109379847	rs549497956	C	T	1347.6	PASS	2	1403;881	1,1	RANBP2	nonsynonymous SNV	COSM200820	1(salivary_gland)	.	.	.	.	.	0.0002	.	.	.	0.001	.	4.13e-05	0	8.69e-05	0	0	4.51e-05	0	6.06e-05	.	.	.	.	.	6.1e-05	0.0002	5.96e-05	0	5.8e-05	0	5.39e-05	0	9.75e-05	0.0002	0.0006	0
2	109382516	.	T	C	1327.6	PASS	1	1465	1	RANBP2	nonsynonymous SNV	.	.	.	.	.	.	.	.	.	.	.	.	.	.	.	.	.	.	.	.	.	.	.	.	.	.	.	.	.	.	.	.	.	.	.	.	.	.
2	109399107	rs200863740	C	T	1613.6	PASS	1	1326	1	RANBP2	nonsynonymous SNV	.	.	.	.	.	.	.	0.0002	.	.	.	0.001	.	6.59e-05	0	0	0	0	0.0001	0	0	0.0001	.	0.0001	.	.	6.5e-05	0	0.0001	0	0	0	0.0001	0	0	.	.	.
2	128028933	.	G	A	138.3	PASS	1	4112447	1	ERCC3	nonsynonymous SNV	.	.	.	.	.	.	.	.	.	.	.	.	.	.	.	.	.	.	.	.	.	.	.	.	.	.	.	.	.	.	.	.	.	.	.	.	.	.
2	141113913	.	T	C	566	PASS	1	128	1	LRP1B	nonsynonymous SNV	.	.	.	.	.	.	.	.	.	.	.	.	.	.	.	.	.	.	.	.	.	.	.	.	.	.	.	.	.	.	.	.	.	.	.	.	.	.
2	141113994	rs138237325	G	A	668.5	PASS	3	772;4156551;4158933	1,1,1	LRP1B	nonsynonymous SNV	COSM3732921	1(stomach)	.	.	.	.	.	0.0014	.	0.0014	.	0.003	0.0031	0.0019	0.0003	0.0016	0	0.0002	0.0027	0.0022	0.0017	0.0027	0.0002	0.004	.	.	0.002	0.0003	0.0008	0.0097	0	0.0003	0.0026	0.0024	0.0021	0.0016	0.0005	0.0012
2	141114007	.	A	G	547	PASS	1	181	1	LRP1B	nonsynonymous SNV	.	.	.	.	.	.	.	.	.	.	.	.	.	.	.	.	.	.	.	.	.	.	.	.	.	.	.	.	.	.	.	.	.	.	.	.	.	.
2	141122274	.	T	A	1337.4	PASS	1	588	1	LRP1B	nonsynonymous SNV	.	.	.	.	.	.	.	.	.	.	.	.	.	.	.	.	.	.	.	.	.	.	.	.	.	.	.	.	.	.	.	.	.	.	.	.	.	.
2	141128797	.	G	A	1107.4	PASS	1	10	1	LRP1B	nonsynonymous SNV	.	.	.	.	.	.	.	.	.	.	.	.	.	.	.	.	.	.	.	.	.	.	.	.	.	.	.	.	.	.	.	.	.	.	.	.	.	.
2	141260535	.	C	T	549.3	PASS	1	122	1	LRP1B	nonsynonymous SNV	.	.	.	.	.	.	.	.	.	.	.	.	.	.	.	.	.	.	.	.	.	.	.	.	.	.	.	.	.	.	.	.	.	.	.	.	.	.
2	141291694	rs527342957	C	T	232	PASS	1	857	1	LRP1B	nonsynonymous SNV	COSM221422	1(haematopoietic_and_lymphoid_tissue);1(oesophagus);1(skin);1(large_intestine)	.	.	.	.	.	0.0002	.	.	.	.	0.001	1.7e-05	9.9e-05	0	0	0	0	0	6.14e-05	.	.	.	.	.	1.23e-05	0.0001	0	0	0	0	0	0	3.27e-05	3.23e-05	0.0001	0
2	141457963	rs149097380	G	A	3522.6	PASS	4	039;1050;1468;345	1,1,1,1	LRP1B	nonsynonymous SNV	.	.	.	.	.	.	.	0.0006	.	.	.	0.002	0.001	0.0011	0.0002	0.0014	0	0.0003	0.0017	0	0.0003	0.0011	0.0007	0.0013	.	.	0.0011	0.0003	0.0014	0.0001	0	0.0002	0.0018	0.0016	0.0005	0.0006	0.0006	0
2	141458164	.	C	T	2206.4	PASS	1	180	1	LRP1B	nonsynonymous SNV	.	.	.	.	.	.	.	.	.	.	.	.	.	.	.	.	.	.	.	.	.	.	.	.	.	.	.	.	.	.	.	.	.	.	.	.	.	.
2	141458166	rs376156015	T	C	525.6	PASS	1	1080	1	LRP1B	nonsynonymous SNV	.	.	.	.	.	.	.	0.0002	.	.	.	0.001	.	1.65e-05	9.67e-05	0	0	0	1.5e-05	0	0	0.0001	0.0002	.	.	.	8.14e-06	0	2.98e-05	0	0	0	8.98e-06	0	0	3.23e-05	0	0
2	141598583	rs199519370	G	A	611.4	PASS	1	4167925	1	LRP1B	nonsynonymous SNV	COSM441184	1(breast);1(stomach);1(pancreas);1(oesophagus)	.	.	.	.	.	0.0004	.	.	0.001	.	0.001	0.0001	0.0002	0.0003	0	0.0002	0.0001	0	6.06e-05	0.0002	.	0.0002	.	.	0.0001	0.0001	5.99e-05	0	0.0001	4.49e-05	0.0002	0.0004	0	0.0002	0.0005	0
2	141739813	rs143670199	C	T	396.1	PASS	1	365	1	LRP1B	nonsynonymous SNV	COSM3117523	1(skin)	.	.	.	.	.	0.0002	.	.	.	.	0.001	0.0002	0	0	0	0	0.0003	0	0.0004	0.0002	.	0.0002	.	.	0.0002	0	0.0001	0	0	0	0.0004	0	0.0003	9.69e-05	0	0
2	141816618	.	T	A	919	PASS	1	8	1	LRP1B	nonsynonymous SNV	.	.	.	.	.	.	.	.	.	.	.	.	.	.	.	.	.	.	.	.	.	.	.	.	.	.	.	.	.	.	.	.	.	.	.	.	.	.
2	141946033	.	C	G	730.6	PASS	1	4130865	1	LRP1B	nonsynonymous SNV	.	.	.	.	.	.	.	.	.	.	.	.	.	.	.	.	.	.	.	.	.	.	.	.	.	.	.	.	.	.	.	.	.	.	.	.	.	.
2	145162535	.	C	T	413.4	PASS	1	4105782	1	ZEB2	nonsynonymous SNV	.	.	.	.	.	.	.	.	.	.	.	.	.	.	.	.	.	.	.	.	.	.	.	.	.	.	.	.	.	.	.	.	.	.	.	.	.	.
2	145274908	rs146394306	G	C	248	PASS	2	382;832	1,1	ZEB2	nonsynonymous SNV	.	.	Likely benign|Likely benign	Mowat-Wilson_syndrome|not_specified	RCV000159501.3|RCV000417402.1	MedGen:OMIM:Orphanet|MedGen	C1856113:235730:ORPHA2152|CN169374	0.0004	.	.	.	0.002	.	0.0001	0	0.0007	0	0	0.0001	0	0	0.0002	0.0002	0.0002	.	.	0.0001	6.64e-05	0.0004	0	0	0	0.0001	0.0009	0	0.0002	0.0002	0
2	169801117	rs952745163	C	T	2675.7	PASS	1	761	1	ABCB11	nonsynonymous SNV	.	.	.	.	.	.	.	.	.	.	.	.	.	.	.	.	.	.	.	.	.	.	.	.	.	.	.	.	.	.	.	.	.	.	.	.	.	.
2	169833127	rs147522210	T	C	491.1	PASS	1	4121974	1	ABCB11	nonsynonymous SNV	.	.	.	.	.	.	.	0.0002	.	.	.	0.001	.	0.0002	0.0001	0.0002	0	0	0.0002	0	6.14e-05	0.0001	.	0.0001	.	.	0.0002	0.0001	0.0002	0	5.85e-05	0	0.0002	0.0002	0.0001	0.0002	0.0001	0
2	176959364	rs1432063993	C	T	258.1	PASS	1	273	1	HOXD13	nonsynonymous SNV	.	.	.	.	.	.	.	.	.	.	.	.	.	.	.	.	.	.	.	.	.	.	.	.	.	.	.	.	.	.	.	.	.	.	.	.	.	.
2	176973644	rs200498866	A	G	3125.1	PASS	1	569	1	HOXD11	nonsynonymous SNV	.	.	.	.	.	.	.	0.0006	.	0.0029	.	0.001	.	0.0003	0.0003	0.001	0	0	0.0003	0	0	0.0002	.	0.0003	.	.	0.0004	0.0001	0.0015	0	0	0	0.0003	0.0009	0	0.0001	0	0.0024
2	178096406	rs141363120	G	A	1094.6	PASS	4	1167;1442;770;842	1,1,1,1	NFE2L2	nonsynonymous SNV	COSM5019708	1(soft_tissue)	not provided	not_specified	RCV000121654.1	MedGen	CN169374	0.0016	0.0038	0.0014	.	0.002	.	0.0025	0.0015	0.0042	0	0	0.0036	0.0022	0.0001	0.0035	0.0019	0.0042	.	0.0082	0.003	0.0013	0.0029	0.0241	0	0.0001	0.003	0.0055	0.0001	0.0016	0.001	0.0036
2	187490251	.	C	T	4140.6	PASS	1	316	1	ITGAV	nonsynonymous SNV	.	.	.	.	.	.	.	.	.	.	.	.	.	.	.	.	.	.	.	.	.	.	.	.	.	.	.	.	.	.	.	.	.	.	.	.	.	.
2	187501824	.	G	A	1901.1	PASS	1	1323	1	ITGAV	nonsynonymous SNV	.	.	.	.	.	.	.	.	.	.	.	.	.	.	.	.	.	.	.	.	.	.	.	.	.	.	.	.	.	.	.	.	.	.	.	.	.	.
2	189852859	.	C	G	220	PASS	1	1262	1	COL3A1	nonsynonymous SNV	.	.	.	.	.	.	.	.	.	.	.	.	.	.	.	.	.	.	.	.	.	.	.	.	.	.	.	.	.	.	.	.	.	.	.	.	.	.
2	189855743	rs112185887	G	A	522.1	PASS	1	1403	1	COL3A1	nonsynonymous SNV	COSM139426;COSM3575355	3(skin)	other|Likely benign|Likely benign	Ehlers-Danlos_syndrome\x2c_type_4|not_specified|Thoracic_aortic_aneurysm_and_aortic_dissection	RCV000148458.5|RCV000181073.3|RCV000253152.1	MedGen:OMIM:Orphanet:SNOMED_CT|MedGen|MedGen:Orphanet	C0268338:130050:ORPHA286:17025000|CN169374|CN118826:ORPHA91387	0.0002	.	.	.	0.001	.	0.0014	0.0008	0.0006	0	0.0003	0.0022	0.0011	6.06e-05	0.0028	0.0009	0.0038	.	.	0.0013	0.0009	0.0007	0	0	0.0003	0.0024	0.0018	0.0001	0.0013	0.0006	0
2	189864081	.	C	T	349.1	PASS	1	4119463	1	COL3A1	nonsynonymous SNV	.	.	.	.	.	.	.	.	.	.	.	.	.	.	.	.	.	.	.	.	.	.	.	.	.	.	.	.	.	.	.	.	.	.	.	.	.	.
2	190660586	rs61756360	C	T	353	PASS	1	4139696	1	PMS1	nonsynonymous SNV	COSM4583036	1(bone)	.	.	.	.	.	0.0004	.	0.0014	.	.	0.001	0.0005	9.62e-05	0.0003	0	0	0.0008	0.0022	0.0002	0.0009	.	0.0014	.	.	0.0006	6.53e-05	0.0005	0	0	0	0.0011	0.0015	0.0002	0.0007	0.0002	0.0036
2	190742010	rs142159998	C	T	827.1	PASS	3	181;353;869	1,1,1	PMS1	nonsynonymous SNV	COSM5861358	1(NS);1(large_intestine)	.	.	.	.	.	0.0002	.	0.0014	.	.	.	0.0004	0	0.0004	0	0	0.0006	0.0011	6.06e-05	0.0004	.	0.0006	.	.	0.0005	0.0001	0.0004	0.0082	0	0	0.0002	0.0007	6.5e-05	0.0001	0	0
2	202141673	.	G	A	631	PASS	1	1257	1	CASP8	nonsynonymous SNV	.	.	.	.	.	.	.	.	.	.	.	.	.	.	.	.	.	.	.	.	.	.	.	.	.	.	.	.	.	.	.	.	.	.	.	.	.	.
2	209108190	rs142801125	T	C	568.3	PASS	1	49	1	IDH1	nonsynonymous SNV	.	.	not provided	not_specified	RCV000121206.1	MedGen	CN169374	0.0002	0.0008	.	.	.	.	8.25e-05	0.0002	0	0	0	0.0001	0	0	0.0002	0.0002	0.0002	.	.	5.69e-05	0	0	0	0	0	0.0001	0	0	.	.	.
2	209116182	rs142923780	A	C	475.4	PASS	1	1103	1	IDH1	nonsynonymous SNV	COSM1581043	1(haematopoietic_and_lymphoid_tissue)	not provided	not_specified	RCV000121202.1	MedGen	CN169374	0.0004	.	.	.	0.002	.	0.0005	0	0.0003	0	0	0.0009	0.0011	0	0.0004	.	0.0006	0.011	.	0.0006	0	0.0006	0.0045	0	0	0.0006	0.0009	3.25e-05	0.0002	0	0.0036
2	212248504	.	G	A	1448.4	PASS	1	1297	1	ERBB4	nonsynonymous SNV	.	.	.	.	.	.	.	.	.	.	.	.	.	.	.	.	.	.	.	.	.	.	.	.	.	.	.	.	.	.	.	.	.	.	.	.	.	.
2	212248576	.	C	G	643.5	PASS	1	322	1	ERBB4	nonsynonymous SNV	.	.	.	.	.	.	.	.	.	.	.	.	.	.	.	.	.	.	.	.	.	.	.	.	.	.	.	.	.	.	.	.	.	.	.	.	.	.
2	212530126	.	T	G	687.3	PASS	1	142	1	ERBB4	nonsynonymous SNV	.	.	.	.	.	.	.	.	.	.	.	.	.	.	.	.	.	.	.	.	.	.	.	.	.	.	.	.	.	.	.	.	.	.	.	.	.	.
2	212578329	rs1377345647	T	C	197.4	PASS	1	4176325	1	ERBB4	nonsynonymous SNV	.	.	.	.	.	.	.	.	.	.	.	.	.	.	.	.	.	.	.	.	.	.	.	.	.	.	.	.	.	.	.	.	.	.	.	3.26e-05	0	0
2	212615423	rs191386517	C	T	342.2	PASS	1	282	1	ERBB4	nonsynonymous SNV	.	.	.	.	.	.	.	0.0002	.	.	0.001	.	.	8.25e-06	0	0	0.0001	0	0	0	0	0.0001	.	0.0001	.	.	8.12e-06	0	2.98e-05	0	5.8e-05	0	0	0	0	.	.	.
2	215610562	rs146946984	C	T	563.1	PASS	1	4198478	1	BARD1	nonsynonymous SNV	.	.	Uncertain significance\x2cUncertain significance|Likely benign|Uncertain significance|Uncertain significance	Hereditary_cancer-predisposing_syndrome\x2cHereditary_cancer-predisposing_syndrome|Familial_cancer_of_breast|not_specified|Breast_cancer	RCV000129644.2\x2cRCV000115617.6|RCV000197934.4|RCV000212137.2|RCV000330195.1	MedGen:SNOMED_CT\x2cMedGen:SNOMED_CT|MedGen:OMIM:Orphanet:SNOMED_CT|MedGen|MedGen	C0027672:699346009\x2cC0027672:699346009|C0346153:114480:ORPHA227535:254843006|CN169374|CN221572	0.0002	.	.	.	.	0.001	0.0004	9.63e-05	8.64e-05	0.0001	0	0.0001	0	0.0025	0.0002	0.0002	0.0002	.	.	0.0004	0	8.93e-05	0.0013	0.0001	0	0.0001	0.0002	0.0023	3.23e-05	0	0
2	215645310	.	T	C	234.7	PASS	1	758	1	BARD1	nonsynonymous SNV	.	.	.	.	.	.	.	.	.	.	.	.	.	.	.	.	.	.	.	.	.	.	.	.	.	.	.	.	.	.	.	.	.	.	.	.	.	.
2	215645867	.	C	A	621.8	PASS	1	4161288	1	BARD1	nonsynonymous SNV	.	.	.	.	.	.	.	.	.	.	.	.	.	.	.	.	.	.	.	.	.	.	.	.	.	.	.	.	.	.	.	.	.	.	.	.	.	.
2	215661842	rs879254139	C	A	415.5	PASS	1	4160069	1	BARD1	splice_acceptor
2	216184456	.	T	C	931.5	PASS	1	778	1	ATIC	splice_donor
2	216190860	.	A	G	224.9	PASS	1	564	1	ATIC	nonsynonymous SNV	.	.	.	.	.	.	.	.	.	.	.	.	.	.	.	.	.	.	.	.	.	.	.	.	.	.	.	.	.	.	.	.	.	.	.	.	.	.
2	216191669	.	T	A	1028	PASS	1	184	1	ATIC	nonsynonymous SNV	.	.	.	.	.	.	.	.	.	.	.	.	.	.	.	.	.	.	.	.	.	.	.	.	.	.	.	.	.	.	.	.	.	.	.	.	.	.
2	216199644	rs956941513	G	A	213.7	PASS	1	18	1	ATIC	nonsynonymous SNV	.	.	.	.	.	.	.	.	.	.	.	.	.	.	.	.	.	.	.	.	.	.	.	.	.	.	.	.	.	.	.	.	.	.	.	.	.	.
2	219846600	.	G	C	238.1	PASS	1	4146301	1	FEV	nonsynonymous SNV	.	.	.	.	.	.	.	.	.	.	.	.	.	.	.	.	.	.	.	.	.	.	.	.	.	.	.	.	.	.	.	.	.	.	.	.	.	.
2	223096946	.	G	C	584.7	PASS	1	4123945	1	PAX3	nonsynonymous SNV	.	.	.	.	.	.	.	.	.	.	.	.	.	.	.	.	.	.	.	.	.	.	.	.	.	.	.	.	.	.	.	.	.	.	.	.	.	.
2	223795450	rs1046032	T	C	614.2	PASS	1	329	1	ACSL3	nonsynonymous SNV	.	.	.	.	.	.	.	0.0004	.	0.0014	.	0.001	.	0.0008	0.0005	0.0007	0	0.0002	0.0011	0.0011	0.0005	0.0012	0.0005	0.0016	.	.	0.0008	0.0005	0.0008	0	0	0	0.0013	0.0004	0.0006	0.0007	0.0003	0.0012
2	232889039	rs202059499	C	T	404.3	PASS	2	831;4101626	1,1	DIS3L2	nonsynonymous SNV	COSM4636699;COSM4636698;COSM4636700;COSM4636697	1(large_intestine)	other	Renal_hamartomas_nephroblastomatosis_and_fetal_gigantism	RCV000287903.1	MedGen:OMIM:Orphanet	C0796113:267000:ORPHA2849	0.001	0.0008	.	.	.	0.0041	0.0009	0.001	0.0002	0.0001	0.0002	0.0005	0	0.0037	0.001	0.0011	0.001	.	.	0.0008	0.0009	6.38e-05	0.0001	6.01e-05	4.5e-05	0.0007	0.0013	0.0032	0.0005	0.0006	0
2	237490000	rs150632398	C	T	344.6	PASS	2	473;4128852	1,1	ACKR3	nonsynonymous SNV	.	.	.	.	.	.	.	0.001	.	0.0014	.	0.003	0.001	0.0023	0.0008	0.0014	0	0.0018	0.0028	0.0011	0.0031	0.0018	0.0007	0.0023	0.011	.	0.0023	0.0005	0.0014	0.0092	0	0.0011	0.0026	0.0022	0.0028	0.0018	0.0001	0.0012
2	237490115	rs143408017	C	T	254.2	PASS	1	52	1	ACKR3	nonsynonymous SNV	.	.	.	.	.	.	.	0.0002	.	.	.	0.001	.	0.0004	9.62e-05	0	0	0.0012	0.0006	0.0011	6.06e-05	0.0005	0.0002	0.0007	.	0.0082	0.0005	0	5.96e-05	0	0	0.0021	0.0007	0.0002	6.5e-05	0.0006	0.0002	0
3	9101988	rs1449155650	T	C	561.4	PASS	1	4100314	1	SRGAP3	nonsynonymous SNV	.	.	.	.	.	.	.	.	.	.	.	.	.	.	.	.	.	.	.	.	.	.	.	.	.	.	.	.	.	.	.	.	.	.	.	.	.	.
3	9475992	.	C	T	826.8	PASS	1	41	1	SETD5	nonsynonymous SNV
3	9476025	.	T	C	1834.5	PASS	1	885	1	SETD5	nonsynonymous SNV	.	.	.	.	.	.	.	.	.	.	.	.	.	.	.	.	.	.	.	.	.	.	.	.	.	.	.	.	.	.	.	.	.	.	.	.	.	.
3	9517188	rs1402788547	C	T	454.2	PASS	1	826	1	SETD5	nonsynonymous SNV	.	.	.	.	.	.	.	.	.	.	.	.	.	.	.	.	.	.	.	.	.	.	.	.	.	.	.	.	.	.	.	.	.	.	.	.	.	.
3	9517443	rs1347746280	A	G	664.7	PASS	1	4128849	1	SETD5	nonsynonymous SNV	.	.	.	.	.	.	.	.	.	.	.	.	.	.	.	.	.	.	.	.	.	.	.	.	.	.	.	.	.	.	.	.	.	.	.	.	.	.
3	10094144	.	C	T	295.9	PASS	1	758	1	FANCD2	nonsynonymous SNV	.	.	.	.	.	.	.	.	.	.	.	.	.	.	.	.	.	.	.	.	.	.	.	.	.	.	.	.	.	.	.	.	.	.	.	.	.	.
3	10107089	rs146509445	C	T	656	PASS	1	4139696	1	FANCD2	nonsynonymous SNV	COSM1580876;COSM1580877	1(haematopoietic_and_lymphoid_tissue)	.	.	.	.	.	0.0002	0.0008	.	.	.	.	0.0001	0.0009	0	0	0	7.49e-05	0	0	0.0003	0.0007	0.0001	.	.	9.75e-05	0.0006	2.98e-05	0	0	0	0.0001	0	0	0.0005	0.0011	0
3	10127543	.	T	A	1514.1	PASS	1	857	1	FANCD2	nonsynonymous SNV	.	.	.	.	.	.	.	.	.	.	.	.	.	.	.	.	.	.	.	.	.	.	.	.	.	.	.	.	.	.	.	.	.	.	.	.	.	.
3	12393122	.	G	A	427	PASS	1	4103141	1	PPARG	nonsynonymous SNV	.	.	.	.	.	.	.	.	.	.	.	.	.	.	.	.	.	.	.	.	.	.	.	.	.	.	.	.	.	.	.	.	.	.	.	.	.	.
3	13612222	rs185394047	G	A	314.8	PASS	1	4183136	1	FBLN2	nonsynonymous SNV	.	.	.	.	.	.	.	0.0004	.	.	.	0.002	.	0.0001	0.0002	0	0	0	0.0001	0	9.58e-05	.	.	.	.	.	6.63e-05	0.0002	0	0	0	0	8.82e-05	0.0002	0.0001	.	.	.
3	13612351	rs373674930	G	A	372.2	PASS	1	283	1	FBLN2	nonsynonymous SNV	.	.	.	.	.	.	.	0.0002	0.0008	.	.	.	.	0.0001	0.0003	0.0004	0.0002	0	8.71e-05	0	0	0.0001	0.0002	.	.	.	0.0001	0.0005	0.0003	0	0.0001	0	8.39e-05	0	6.71e-05	0.0002	0.0005	0
3	13612459	rs113514375	G	C	644.9	PASS	1	596	1	FBLN2	nonsynonymous SNV	.	.	.	.	.	.	.	0.0008	.	0.0014	.	0.003	.	0.0017	0.0006	0.0007	0	0.0004	0.0027	0.0016	0	0.0018	0.0002	0.0025	.	.	0.0012	0.0002	0.0005	0	0	0.0004	0.0023	0.0017	0	0.0024	0.0003	0
3	13613135	.	A	T	661.5	PASS	1	60	1	FBLN2	nonsynonymous SNV	.	.	.	.	.	.	.	.	.	.	.	.	.	.	.	.	.	.	.	.	.	.	.	.	.	.	.	.	.	.	.	.	.	.	.	.	.	.
3	13661319	rs200141144	G	A	390	PASS	1	676	1	FBLN2	nonsynonymous SNV	COSM3427124;COSM3427125	1(large_intestine)	.	.	.	.	.	0.0002	.	.	.	.	0.001	0.0005	0	0.0012	0.0011	0	0.0002	0	0.0012	0.0004	.	0.0006	.	.	0.0005	0	0.0005	0	0.0012	0	0.0003	0.0011	0.0014	0.0002	0.0001	0
3	13672274	rs201224373	G	A	383.4	PASS	1	4159421	1	FBLN2	nonsynonymous SNV	COSM1038940;COSM1038941	1(oesophagus);1(endometrium)	.	.	.	.	.	0.0002	.	0.0014	.	.	.	0.0004	0	0.0001	0	0	0.0007	0	0	0.0004	.	0.0006	.	.	0.0003	0	0.0002	0	0.0002	4.64e-05	0.0005	0.0004	0	0.0003	0.0001	0.0012
3	13672888	rs199983858	C	G	294.2	PASS	1	4173863	1	FBLN2	nonsynonymous SNV	.	.	.	.	.	.	.	0.0002	.	.	.	0.001	.	0.0015	0	0.0007	0	0.0038	0.0023	0	0	0.0002	0.0002	0.0002	.	.	0.0008	7.64e-05	0.0007	0.0001	0	0.0012	0.0013	0.0016	0	0.0007	0.0001	0
3	13679318	rs373305821	C	T	256.5	PASS	1	4108988	1	FBLN2	nonsynonymous SNV	.	.	.	.	.	.	.	0.0002	.	.	0.001	.	.	4.98e-05	0	0	0.0003	0	3.01e-05	0	6.08e-05	0.0001	.	0.0001	.	.	5.7e-05	0	0	0	0.0003	0	6.3e-05	0	3.25e-05	6.46e-05	0	0
3	14188863	rs751767428	G	A	568.4	PASS	2	115;177	1,1	XPC	nonsynonymous SNV	.	.	.	.	.	.	.	.	.	.	.	.	.	.	.	.	.	.	.	.	.	.	.	.	.	.	.	.	.	.	.	.	.	.	.	.	.	.
3	14188864	.	C	G	229.4	PASS	1	1162	1	XPC	nonsynonymous SNV	.	.	.	.	.	.	.	.	.	.	.	.	.	.	.	.	.	.	.	.	.	.	.	.	.	.	.	.	.	.	.	.	.	.	.	.	.	.
3	14199602	rs147900621	C	T	512.4	PASS	2	1188;4167925	1,1	XPC	nonsynonymous SNV	.	.	.	.	.	.	.	0.0004	.	0.0014	.	0.001	.	0.0001	0.0002	0.0006	0	0	8.99e-05	0	0	0.0002	0.0003	0.0001	.	.	0.0001	0.0001	0.0003	0.0001	0	8.97e-05	0.0001	0.0002	0	0.0002	0	0.0012
3	14199784	rs977308365	C	G	3109.1	PASS	1	325	1	XPC	nonsynonymous SNV	.	.	.	.	.	.	.	.	.	.	.	.	.	.	.	.	.	.	.	.	.	.	.	.	.	.	.	.	.	.	.	.	.	.	.	.	.	.
3	30713698	.	C	CA	1395.7	PASS	1	588	1	TGFBR2	frameshift insertion
3	30713834	rs35766612	G	A	2964.7	PASS	4	795;4103627;4110996;4177856	1,1,1,1	TGFBR2	nonsynonymous SNV	COSM5019392;COSM5019391	2(soft_tissue)	Likely benign|Uncertain significance|other|Likely benign|Likely benign\x2cUncertain significance|other|Uncertain significance|Uncertain significance|Uncertain significance	not_specified|Congenital_aneurysm_of_ascending_aorta|Thoracic_aortic_aneurysm_and_aortic_dissection|Loeys-Dietz_syndrome|Marfan_syndrome\x2cLoeys-Dietz_syndrome|not_specified|Thoracic_aortic_aneurysm_and_aortic_dissection|Aneurysm|Ascending_aortic_aneurysm	RCV000037728.4|RCV000148893.1|RCV000249404.2|RCV000288248.1|RCV000345619.1\x2cRCV000030544.2|RCV000152009.2|RCV000249454.1|RCV000414949.1|RCV000414949.1	MedGen|Gene:MedGen:OMIM:Orphanet:SNOMED_CT|MedGen:Orphanet|MedGen:Orphanet:SNOMED_CT|MedGen:OMIM:Orphanet:SNOMED_CT\x2cMedGen:Orphanet:SNOMED_CT|MedGen|MedGen:Orphanet|Human_Phenotype_Ontology:MedGen|Human_Phenotype_Ontology:MedGen	CN169374|252842:C0345050:607086:ORPHA229:253646008|CN118826:ORPHA91387|C2697932:ORPHA60030:446263001|C0024796:154700:ORPHA558:19346006\x2cC2697932:ORPHA60030:446263001|CN169374|CN118826:ORPHA91387|HP:0002617:C0002940|HP:0002631:C0856747	0.0002	.	.	.	0.001	.	0.0012	0.0003	0.0002	0	0.0011	0.0019	0	0.0002	0.0023	0.0009	0.003	.	.	0.0011	0.0002	0.0003	0.0003	0	0.0009	0.0018	0.0015	0.0003	0.0018	0.0005	0.0024
3	47079245	rs76132393	T	C	207.9	PASS	1	4174905	1	SETD2	nonsynonymous SNV	COSM1581651;COSM1581650	1(haematopoietic_and_lymphoid_tissue)	.	.	.	.	.	0.0004	.	.	0.002	.	.	0.0002	0.0002	0	0.0015	0	7.49e-05	0	6.06e-05	0.0001	0.0002	.	.	.	0.0001	0.0001	0	0	0.001	0	0.0001	0.0002	9.75e-05	3.23e-05	0	0
3	47084109	rs564576540	T	C	1627.1	PASS	1	139	1	SETD2	nonsynonymous SNV	.	.	.	.	.	.	.	.	.	.	.	.	.	.	.	.	.	.	.	.	.	.	.	.	.	.	.	.	.	.	.	.	.	.	.	.	.	.
3	47088054	.	G	A	566.3	PASS	1	7	1	SETD2	nonsynonymous SNV	.	.	.	.	.	.	.	.	.	.	.	.	.	.	.	.	.	.	.	.	.	.	.	.	.	.	.	.	.	.	.	.	.	.	.	.	.	.
3	47155379	.	T	C	776.1	PASS	1	772	1	SETD2	nonsynonymous SNV	.	.	.	.	.	.	.	.	.	.	.	.	.	.	.	.	.	.	.	.	.	.	.	.	.	.	.	.	.	.	.	.	.	.	.	.	.	.
3	47165151	.	T	A	429.3	PASS	1	1431	1	SETD2	nonsynonymous SNV	.	.	.	.	.	.	.	.	.	.	.	.	.	.	.	.	.	.	.	.	.	.	.	.	.	.	.	.	.	.	.	.	.	.	.	.	.	.
3	47165404	.	G	A	1265.2	PASS	1	1533	1	SETD2	nonsynonymous SNV	.	.	.	.	.	.	.	.	.	.	.	.	.	.	.	.	.	.	.	.	.	.	.	.	.	.	.	.	.	.	.	.	.	.	.	.	.	.
3	48716065	rs142430903	G	A	846	PASS	4	1319;158;4128477;4144131	1,1,1,1	NCKIPSD	nonsynonymous SNV	.	.	.	.	.	.	.	0.0002	.	0.0014	.	.	.	0.0008	0.0003	0.0003	0	0.0008	0.0013	0	6.08e-05	0.0008	0.0002	0.0012	.	.	0.0008	0.0003	0.0003	0.0015	0	0.0005	0.0014	0.0005	6.5e-05	0.0012	0.0003	0
3	50289947	rs183955200	G	A	272.5	PASS	1	575	1	GNAI2	nonsynonymous SNV	COSM1046441	1(endometrium)	.	.	.	.	.	0.0002	.	.	.	0.001	.	0.0003	0.0001	0.0005	0	0.0006	0.0004	0	0	0.0002	0.0002	0.0001	.	.	0.0003	0.0001	0.0005	0	0	0.0004	0.0004	0.0002	0	0.0003	0.0002	0
3	50293752	.	A	G	387	PASS	1	1078	1	GNAI2	nonsynonymous SNV	.	.	.	.	.	.	.	.	.	.	.	.	.	.	.	.	.	.	.	.	.	.	.	.	.	.	.	.	.	.	.	.	.	.	.	.	.	.
3	52623158	.	A	G	451.9	PASS	1	4162611	1	PBRM1	nonsynonymous SNV	.	.	.	.	.	.	.	.	.	.	.	.	.	.	.	.	.	.	.	.	.	.	.	.	.	.	.	.	.	.	.	.	.	.	.	.	.	.
3	52623229	rs141067977	G	A	369.3	PASS	1	4120157	1	PBRM1	nonsynonymous SNV	.	.	.	.	.	.	.	0.0002	.	.	.	0.001	.	8.48e-05	0	0	0	0	0.0002	0	0	0.0001	.	0.0001	.	.	7.65e-05	0	0	0	0	0	0.0002	0	0	.	.	.
3	52668826	rs147499494	G	A	568.3	PASS	1	4123945	1	PBRM1	nonsynonymous SNV	.	.	.	.	.	.	.	0.0002	.	.	.	0.001	.	0.0002	0.0002	8.66e-05	0	0	0.0003	0	0	0.0005	0.0002	0.0007	.	.	0.0002	6.55e-05	5.98e-05	0	0	0	0.0005	0	0	0.0002	0.0001	0
3	53700551	rs148674323	G	A	4172.6	PASS	1	1166	1	CACNA1D	nonsynonymous SNV	.	.	.	.	.	.	.	0.0002	.	.	.	0.001	.	4.12e-05	0	8.65e-05	0	0	6e-05	0	0	0.0001	.	0.0001	.	.	4.07e-05	0	8.94e-05	0	0	0	5.4e-05	0.0002	0	.	.	.
3	53756360	.	A	T	518	PASS	1	4163741	1	CACNA1D	nonsynonymous SNV	.	.	.	.	.	.	.	.	.	.	.	.	.	.	.	.	.	.	.	.	.	.	.	.	.	.	.	.	.	.	.	.	.	.	.	.	.	.
3	53757995	rs149676780	A	G	300.5	PASS	1	56	1	CACNA1D	nonsynonymous SNV	.	.	.	.	.	.	.	0.0002	.	.	.	.	0.001	0.0002	0	0.0003	0	0	9.01e-05	0	0.0006	0.0001	.	0.0001	.	.	0.0001	0	0.0002	0	0	0	5.38e-05	0.0004	0.0006	9.69e-05	0	0.0012
3	53760960	.	G	A	360.3	PASS	1	1307	1	CACNA1D	nonsynonymous SNV	.	.	.	.	.	.	.	.	.	.	.	.	.	.	.	.	.	.	.	.	.	.	.	.	.	.	.	.	.	.	.	.	.	.	.	.	.	.
3	53764570	.	A	T	644.5	PASS	1	4171586	1	CACNA1D	stopgain	.	.	.	.	.	.	.	.	.	.	.	.	.	.	.	.	.	.	.	.	.	.	.	.	.	.	.	.	.	.	.	.	.	.	.	.	.	.
3	53842681	rs571923567	C	T	350.1	PASS	1	4131213	1	CACNA1D	nonsynonymous SNV	.	.	.	.	.	.	.	0.0002	.	0.0014	.	.	.	2.49e-05	0	0	0	0	4.53e-05	0	0	.	.	.	.	.	1.66e-05	0	0	0	0	0	2.69e-05	0.0002	0	.	.	.
3	59908137	rs202183587	C	T	588	PASS	1	1307	1	FHIT	nonsynonymous SNV	.	.	.	.	.	.	.	0.0002	.	0.0014	.	.	.	6.6e-05	0	8.67e-05	0	0	0.0001	0	0	.	.	.	.	.	8.15e-05	0	0.0002	0	0	0	9.87e-05	0.0004	0	3.23e-05	0	0
3	60522626	.	C	A	384	PASS	1	4124188	1	FHIT	nonsynonymous SNV	.	.	.	.	.	.	.	.	.	.	.	.	.	.	.	.	.	.	.	.	.	.	.	.	.	.	.	.	.	.	.	.	.	.	.	.	.	.
3	69928307	.	G	A	428.8	PASS	1	4120157	1	MITF	nonsynonymous SNV	.	.	.	.	.	.	.	.	.	.	.	.	.	.	.	.	.	.	.	.	.	.	.	.	.	.	.	.	.	.	.	.	.	.	.	.	.	.
3	70008500	.	C	T	424.7	PASS	2	4103570;4125240	1,1	MITF	nonsynonymous SNV	COSM4807147;COSM4807148;COSM4807149;COSM4807146	1(haematopoietic_and_lymphoid_tissue);1(pancreas)	.	.	.	.	.	.	.	.	.	.	.	.	.	.	.	.	.	.	.	0.0001	.	0.0001	.	.	.	.	.	.	.	.	.	.	.	.	.	.
3	70014091	rs149617956	G	A	1139.9	PASS	7	145;152;422;874;4110498;4142267;4144951	1,1,1,1,1,1,1	MITF	nonsynonymous SNV	.	.	other|Pathogenic|other	Cutaneous_malignant_melanoma_8|Hereditary_cancer-predisposing_syndrome|not_specified	RCV000022661.5|RCV000129682.1|RCV000222278.2	MedGen:OMIM:Orphanet|MedGen:SNOMED_CT|MedGen	C3152204:614456:ORPHA293822|C0027672:699346009|CN169374	0.0008	0.0008	0.0014	.	0.002	.	0.0013	0.0007	0.0003	0	0.0015	0.0021	0	0	0.0022	0.0005	0.0031	.	.	0.0014	0.0006	0.0005	0	0	0.0011	0.0025	0.0005	0	0.0014	0.0007	0.0024
3	71015168	rs202173892	C	T	550.5	PASS	1	4133863	1	FOXP1	nonsynonymous SNV	.	.	.	.	.	.	.	0.0002	0.0008	.	.	.	.	0.0003	0.0007	0.001	0	0	0.0002	0.0011	6.06e-05	0.0004	0.0007	0.0002	.	.	0.0003	0.0007	0.0012	0	0	0	0.0002	0.0002	3.25e-05	0.0003	0.0008	0.0012
3	71027110	rs200355554	G	C	1463.3	PASS	3	1266;330;776	1,1,1	FOXP1	nonsynonymous SNV	.	.	Likely benign	Intellectual_Disability_with_Language_Impairment_and_Autistic_Features	RCV000309233.1	MedGen	CN239203	0.0002	.	.	.	0.001	.	9.89e-05	0	0	0	0	0.0002	0	0	0.0001	.	0.0001	.	.	0.0001	0	0	0	0	0	0.0003	0	0	0.0002	0	0
3	71064716	.	A	G	456	PASS	1	1432	1	FOXP1	nonsynonymous SNV	.	.	.	.	.	.	.	.	.	.	.	.	.	.	.	.	.	.	.	.	.	.	.	.	.	.	.	.	.	.	.	.	.	.	.	.	.	.
3	73432565	rs145452940	G	A	2067.4	PASS	3	1441;1545;466	1,1,1	PDZRN3	nonsynonymous SNV	.	.	.	.	.	.	.	0.0006	.	0.0014	.	0.002	.	0.0007	0	8.64e-05	0	0.0003	0.0012	0	0.0002	0.0011	.	0.0016	.	.	0.0008	6.54e-05	0.0003	0.0057	5.8e-05	0.0003	0.001	0.0005	0.0001	0.0005	0.0001	0.0024
3	73439024	rs146640162	G	C	334.6	PASS	1	342	1	PDZRN3	nonsynonymous SNV	.	.	.	.	.	.	.	0.0002	.	.	.	0.001	.	0.0004	0	0	0	0.0002	0.0007	0	0	0.0005	0.0002	0.0007	.	.	0.0004	6.53e-05	0.0004	0.0001	0	8.97e-05	0.0007	0.0005	0	0.0002	0	0
3	73450098	.	A	C	1463	PASS	1	567	1	PDZRN3	nonsynonymous SNV	.	.	.	.	.	.	.	.	.	.	.	.	.	.	.	.	.	.	.	.	.	.	.	.	.	.	.	.	.	.	.	.	.	.	.	.	.	.
3	73450146	rs141385664	T	C	1893.6	PASS	1	1568	2	PDZRN3	nonsynonymous SNV	.	.	.	.	.	.	.	0.0006	.	.	.	0.003	.	0.0007	0.0004	0.0006	0	0	0.001	0	0	0.001	0.0002	0.0014	.	.	0.001	0.0003	0.0016	0	0	0	0.0016	0.0004	0	0.0009	0.0003	0
3	73453470	.	A	G	1565.1	PASS	1	1481	1	PDZRN3	nonsynonymous SNV	.	.	.	.	.	.	.	.	.	.	.	.	.	.	.	.	.	.	.	.	.	.	.	.	.	.	.	.	.	.	.	.	.	.	.	.	.	.
3	73657832	rs150437956	C	T	689.5	PASS	2	1326;4188900	1,1	PDZRN3	nonsynonymous SNV	.	.	.	.	.	.	.	0.0006	.	0.0014	.	0.002	.	0.0007	0.0003	0.001	0	0	0.0011	0.0032	0	0.0007	.	0.001	.	.	0.0005	0.0003	0.0006	0	0	0	0.0009	0.0006	0	0.0006	0.0002	0.0024
3	77542429	.	G	T	196.7	PASS	1	4120157	1	ROBO2	nonsynonymous SNV	.	.	.	.	.	.	.	.	.	.	.	.	.	.	.	.	.	.	.	.	.	.	.	.	.	.	.	.	.	.	.	.	.	.	.	.	.	.
3	77614236	rs200111733	A	G	1118.8	PASS	1	30	1	ROBO2	nonsynonymous SNV	.	.	.	.	.	.	.	0.0002	.	.	.	0.001	.	8.29e-05	0	0	0	0	0.0001	0	0	.	.	.	.	.	7.33e-05	0	2.98e-05	0	0	4.49e-05	0.0001	0	0	6.47e-05	0	0
3	77657045	rs374166639	C	A	318.3	PASS	1	4116268	1	ROBO2	nonsynonymous SNV	.	.	.	.	.	.	.	0.0004	.	.	.	.	0.002	0.0002	0	0.002	0	0	1.5e-05	0	0.0004	.	.	.	.	.	0.0002	0	0.0013	0	5.8e-05	0	8.95e-06	0	0.0003	.	.	.
3	77666792	.	C	A	279.8	PASS	2	083;026	1,1	ROBO2	nonsynonymous SNV	.	.	.	.	.	.	.	.	.	.	.	.	.	.	.	.	.	.	.	.	.	.	.	.	.	.	.	.	.	.	.	.	.	.	.	.	.	.
3	77684116	rs62250276	C	T	206.8	PASS	1	1096	1	ROBO2	nonsynonymous SNV	COSM5125353	1(large_intestine)	.	.	.	.	.	0.0006	.	.	.	0.003	.	0.0003	0.0003	8.64e-05	0	0	0.0005	0	0	0.0004	0.0003	0.0005	.	.	0.0002	0.0003	5.96e-05	0	0	0	0.0004	0	3.25e-05	0.0002	0.0002	0
3	89259477	rs200567888	G	T	561.8	PASS	2	4108627;4148771	1,1	EPHA3	nonsynonymous SNV	.	.	.	.	.	.	.	0.0004	.	.	.	0.002	.	0.0012	9.63e-05	8.69e-05	0	0.0029	0.0016	0	0.0007	0.0007	.	0.001	.	.	0.0012	0.0001	8.96e-05	0.0019	0	0.0025	0.0017	0.0005	0.0007	0.0018	0	0
3	89499366	rs142030914	C	G	293	PASS	1	4166940	1	EPHA3	nonsynonymous SNV	.	.	.	.	.	.	.	0.0002	.	.	0.001	.	.	1.66e-05	0	0	0	0	3.01e-05	0	0	0.0001	.	0.0001	.	.	8.18e-06	0	0	0	0	0	1.8e-05	0	0	6.46e-05	0.0002	0
3	105378061	rs55821768	G	C	643.1	PASS	1	4171586	1	CBLB	nonsynonymous SNV	.	.	not provided	not_specified	RCV000120478.1	MedGen	CN169374	0.0002	.	.	.	0.001	.	0.0006	0	0.0018	0	0.0006	0.0007	0.0011	6.06e-05	0.0007	0.0002	0.0009	.	.	0.0005	0	0.001	0.0014	0	0.0004	0.0006	0.0026	3.25e-05	0.0008	0.0001	0.0012
3	105389086	.	A	G	897.6	PASS	1	1565	1	CBLB	nonsynonymous SNV	.	.	.	.	.	.	.	.	.	.	.	.	.	.	.	.	.	.	.	.	.	.	.	.	.	.	.	.	.	.	.	.	.	.	.	.	.	.
3	105438946	.	T	C	340	PASS	1	4124188	1	CBLB	nonsynonymous SNV	.	.	.	.	.	.	.	.	.	.	.	.	.	.	.	.	.	.	.	.	.	.	.	.	.	.	.	.	.	.	.	.	.	.	.	.	.	.
3	105452960	.	T	C	369.5	PASS	1	4110378	1	CBLB	nonsynonymous SNV	.	.	.	.	.	.	.	.	.	.	.	.	.	.	.	.	.	.	.	.	.	.	.	.	.	.	.	.	.	.	.	.	.	.	.	.	.	.
3	121155022	.	G	T	1238.9	PASS	1	580	1	POLQ	stopgain	.	.	.	.	.	.	.	.	.	.	.	.	.	.	.	.	.	.	.	.	.	.	.	.	.	.	.	.	.	.	.	.	.	.	.	.	.	.
3	121168167	rs150364457	T	C	1788.5	PASS	3	1290;464;026	1,1,1	POLQ	nonsynonymous SNV	.	.	.	.	.	.	.	0.0002	.	.	.	0.001	.	0.0003	0.0003	0	0	0.0002	0.0005	0	0	0.0005	0.0005	0.0005	.	.	0.0003	0.0003	0.0001	0.0016	0	4.49e-05	0.0005	0	0	0.0002	0.0003	0
3	121187254	rs376729696	T	C	3194.6	PASS	1	350	1	POLQ	nonsynonymous SNV	.	.	.	.	.	.	.	0.0002	.	.	.	.	0.001	0.0001	0	0	0	0	8.99e-05	0	0.0006	0.0001	0.0002	.	.	.	0.0001	0	0	0	0	0	0.0001	0	0.0006	9.69e-05	0	0
3	121206336	.	C	CTGTA	405.1	PASS	1	4160468	1	POLQ	frameshift insertion
3	121206883	.	G	A	4295.6	PASS	1	10	1	POLQ	nonsynonymous SNV	.	.	.	.	.	.	.	.	.	.	.	.	.	.	.	.	.	.	.	.	.	.	.	.	.	.	.	.	.	.	.	.	.	.	.	.	.	.
3	121217496	rs142537679	A	C	1963.3	PASS	5	114;4158483;4166151;4179976;4183924	1,1,1,1,1	POLQ	nonsynonymous SNV	.	.	.	.	.	.	.	0.0008	.	0.0029	.	0.002	.	0.0024	0.0003	0.0007	0	0.0019	0.0041	0.0023	0	0.0022	0.0005	0.0031	.	.	0.0022	0.0005	0.0007	0.0007	0	0.0026	0.004	0.0015	0	0.0029	0.0005	0
3	121240849	.	C	A	214.6	PASS	1	1360	1	POLQ	splice_donor
3	121248569	.	CA	C	260.2	PASS	1	4138527	1	POLQ	frameshift deletion
3	121251884	rs61757736	A	C	1106.6	PASS	3	004;197;4161696	1,1,1	POLQ	nonsynonymous SNV	.	.	.	.	.	.	.	0.0016	.	0.0029	.	0.004	0.002	0.0016	0.0004	0.0007	0	0.0014	0.0026	0.0022	0.0004	0.0022	0.0007	0.0029	.	0.0082	0.0016	0.0005	0.0013	0	0	0.001	0.0028	0.0018	0.0002	0.0017	0.0001	0.0012
3	121258399	.	T	C	215.3	PASS	1	4117030	1	POLQ	nonsynonymous SNV	.	.	.	.	.	.	.	.	.	.	.	.	.	.	.	.	.	.	.	.	.	.	.	.	.	.	.	.	.	.	.	.	.	.	.	.	.	.
3	128348870	.	G	C	638.9	PASS	1	4140544	1	RPN1	nonsynonymous SNV	.	.	.	.	.	.	.	.	.	.	.	.	.	.	.	.	.	.	.	.	.	.	.	.	.	.	.	.	.	.	.	.	.	.	.	.	.	.
3	128348979	.	A	G	373.2	PASS	1	4130194	1	RPN1	nonsynonymous SNV	.	.	.	.	.	.	.	.	.	.	.	.	.	.	.	.	.	.	.	.	.	.	.	.	.	.	.	.	.	.	.	.	.	.	.	.	.	.
3	128356897	.	C	G	725.2	PASS	1	180	1	RPN1	nonsynonymous SNV	.	.	.	.	.	.	.	.	.	.	.	.	.	.	.	.	.	.	.	.	.	.	.	.	.	.	.	.	.	.	.	.	.	.	.	.	.	.
3	138453585	.	T	A	318.3	PASS	1	4127766	1	PIK3CB	nonsynonymous SNV	.	.	.	.	.	.	.	.	.	.	.	.	.	.	.	.	.	.	.	.	.	.	.	.	.	.	.	.	.	.	.	.	.	.	.	.	.	.
3	138453640	rs148366420	G	A	280.1	PASS	1	824	1	PIK3CB	nonsynonymous SNV	COSM1039063	1(endometrium)	.	.	.	.	.	0.0002	.	.	.	0.001	.	2.49e-05	9.82e-05	0	0	0	3.01e-05	0	0	.	.	.	.	.	1.24e-05	6.61e-05	0	0	0	0	1.82e-05	0	0	3.24e-05	0	0.0012
3	138474646	.	C	G	330.4	PASS	1	4135278	1	PIK3CB	nonsynonymous SNV	.	.	.	.	.	.	.	.	.	.	.	.	.	.	.	.	.	.	.	.	.	.	.	.	.	.	.	.	.	.	.	.	.	.	.	.	.	.
3	138478130	rs148660928	G	A	423.7	PASS	1	4177842	1	PIK3CB	nonsynonymous SNV	.	.	.	.	.	.	.	0.0006	0.0023	.	.	.	.	4.94e-05	0.0003	0	0	0	4.5e-05	0	0	.	.	.	0.011	.	5.28e-05	0.0003	0	0	5.8e-05	0	5.37e-05	0	6.5e-05	0.0002	0.0001	0.0012
3	138665011	rs1465408686	C	T	238.6	PASS	1	4164943	1	FOXL2	nonsynonymous SNV	.	.	.	.	.	.	.	.	.	.	.	.	.	.	.	.	.	.	.	.	.	.	.	.	.	.	.	.	.	.	.	.	.	.	.	.	.	.
3	138665561	.	T	G	329.2	PASS	1	4108588	1	FOXL2	nonsynonymous SNV	.	.	.	.	.	.	.	.	.	.	.	.	.	.	.	.	.	.	.	.	.	.	.	.	.	.	.	.	.	.	.	.	.	.	.	.	.	.
3	142272098	rs141783863	A	G	653.2	PASS	1	4179976	1	ATR	nonsynonymous SNV	.	.	Uncertain significance	Seckel_syndrome	RCV000264411.1	MedGen:Orphanet:SNOMED_CT	C0265202:ORPHA808:57917004	0.0004	.	.	.	0.002	.	0.0012	0.0006	0	0	0.0014	0.002	0	0	0.0009	0.0005	0.0012	.	.	0.0011	0.0005	0.0004	0.0002	0	0.0012	0.002	0.0015	0	0.0009	0.0002	0
3	142272513	.	T	G	137.3	PASS	1	815	1	ATR	nonsynonymous SNV	.	.	.	.	.	.	.	.	.	.	.	.	.	.	.	.	.	.	.	.	.	.	.	.	.	.	.	.	.	.	.	.	.	.	.	.	.	.
3	142272549	.	G	A	904.4	PASS	1	4100049	1	ATR	nonsynonymous SNV	.	.	.	.	.	.	.	.	.	.	.	.	.	.	.	.	.	.	.	.	.	.	.	.	.	.	.	.	.	.	.	.	.	.	.	.	.	.
3	142839681	rs545988820	C	T	437.4	PASS	1	4164943	1	CHST2	nonsynonymous SNV	.	.	.	.	.	.	.	0.0012	.	.	.	0.002	0.0041	0	0	0	.	0	0	.	0	.	.	.	.	.	0.0007	0	0	0	0	0	0.0016	0	0.0345	0.0004	0.0002	0
3	154836554	rs147564881	G	C	841.1	PASS	3	466;134;4135278	1,1,1	MME	nonsynonymous SNV	.	.	.	.	.	.	.	0.001	.	0.0043	.	0.002	.	0.0022	0.0006	0.0027	0	0	0.0033	0.0016	0.0006	0.0016	0.0002	0.0023	.	.	0.0016	0.0003	0.0028	0.0044	0	0	0.0021	0.0017	0.0004	0.0007	0.0003	0.0036
3	154859862	rs138218277	A	G	728.5	PASS	3	4177406;4177810;4177856	1,1,1	MME	nonsynonymous SNV	.	.	.	.	.	.	.	0.0002	.	0.0014	.	.	.	0.0005	0.0003	0.0003	0	0	0.0007	0	0	0.0006	0.0005	0.0007	.	.	0.0005	0.0001	0.0002	0	0	4.49e-05	0.001	0.0004	0	0.0006	0.0001	0.0012
3	154860085	rs200791566	G	A	953.1	PASS	1	754	1	MME	nonsynonymous SNV	COSM207009	1(skin)	.	.	.	.	.	0.0002	0.0008	.	.	.	.	3.31e-05	9.76e-05	0	0	0	4.5e-05	0	0	0.0001	.	0.0001	.	.	2.85e-05	0.0002	2.99e-05	0	0	0	2.7e-05	0	0	.	.	.
3	154884774	.	A	G	412.8	PASS	1	4140544	1	MME	nonsynonymous SNV	.	.	.	.	.	.	.	.	.	.	.	.	.	.	.	.	.	.	.	.	.	.	.	.	.	.	.	.	.	.	.	.	.	.	.	.	.	.
3	155615742	.	A	G	445	PASS	1	70	1	GMPS	nonsynonymous SNV	.	.	.	.	.	.	.	.	.	.	.	.	.	.	.	.	.	.	.	.	.	.	.	.	.	.	.	.	.	.	.	.	.	.	.	.	.	.
3	155628504	.	T	G	299	PASS	1	1277	1	GMPS	nonsynonymous SNV	.	.	.	.	.	.	.	.	.	.	.	.	.	.	.	.	.	.	.	.	.	.	.	.	.	.	.	.	.	.	.	.	.	.	.	.	.	.
3	155632309	.	A	G	3198	PASS	1	664	1	GMPS	nonsynonymous SNV	.	.	.	.	.	.	.	.	.	.	.	.	.	.	.	.	.	.	.	.	.	.	.	.	.	.	.	.	.	.	.	.	.	.	.	.	.	.
3	155649643	rs190602670	A	G	219.3	PASS	1	4105105	1	GMPS	nonsynonymous SNV	.	.	.	.	.	.	.	0.0002	.	0.0014	.	.	.	8.28e-06	0	0	0	0	1.5e-05	0	0	.	.	.	.	.	4.06e-06	0	0	0	0	0	8.96e-06	0	0	.	.	.
3	168802737	rs201825977	G	A	563.6	PASS	1	1471	1	MECOM	nonsynonymous SNV	COSM4115102;COSM4115101	1(stomach)	.	.	.	.	.	0.0002	.	.	.	.	0.001	0.0002	0	0	0.0021	0	0.0001	0.0011	0.0001	0.0002	.	0.0002	.	.	0.0002	0	5.96e-05	0	0.0019	0	0.0001	0.0004	3.25e-05	0.0002	0	0
3	168819949	.	A	C	994.3	PASS	1	804	1	MECOM	nonsynonymous SNV	.	.	.	.	.	.	.	.	.	.	.	.	.	.	.	.	.	.	.	.	.	.	.	.	.	.	.	.	.	.	.	.	.	.	.	.	.	.
3	168834158	rs199568118	T	C	922.2	PASS	2	753;753	1,1	MECOM	nonsynonymous SNV	.	.	.	.	.	.	.	0.0002	.	.	.	0.001	.	9.06e-05	9.61e-05	0	0	0	0.0001	0	0	.	.	.	.	.	8.13e-05	6.54e-05	2.98e-05	0	0	0	0.0002	0.0002	0	6.46e-05	0.0001	0
3	168834305	rs145677287	T	G	84.5	PASS	1	25	1	MECOM	nonsynonymous SNV	COSM1236077	1(haematopoietic_and_lymphoid_tissue)	.	.	.	.	.	0.0002	.	.	.	0.001	.	0.0003	0.0003	0.0003	0	0	0.0004	0	0	0.0003	.	0.0005	.	.	0.0003	0.0002	0.0002	0.0002	0	0	0.0005	0.0004	0	0.0003	0	0
3	168840462	rs34896995	T	C	566.7	PASS	3	039;4101316;4161696	1,1,1	MECOM	nonsynonymous SNV	.	.	.	.	.	.	.	0.001	0.0008	.	.	0.004	.	0.0026	0.0015	0.0003	0	0.0026	0.004	0.0011	0.0008	0.0018	0.0016	0.002	.	.	0.0023	0.0012	0.0007	0	0	0.0017	0.0041	0.002	0.0007	0.0024	0.0011	0.0048
3	168845789	.	C	T	453.4	PASS	1	266	1	MECOM	nonsynonymous SNV	.	.	.	.	.	.	.	.	.	.	.	.	.	.	.	.	.	.	.	.	.	.	.	.	.	.	.	.	.	.	.	.	.	.	.	.	.	.
3	185414441	.	C	A	305.8	PASS	1	1298	1	IGF2BP2	nonsynonymous SNV	.	.	.	.	.	.	.	.	.	.	.	.	.	.	.	.	.	.	.	.	.	.	.	.	.	.	.	.	.	.	.	.	.	.	.	.	.	.
3	185798862	rs61760177	T	C	4781.9	PASS	1	812	1	ETV5	nonsynonymous SNV	.	.	.	.	.	.	.	0.0002	.	.	.	0.001	.	0.0008	0.0003	0.0005	0	0	0.0014	0	0	0.0018	0.0011	0.0021	.	.	0.001	0.0003	0.001	0.0074	0	0.0002	0.0011	0.0011	0	0.0009	0	0
3	187444636	.	C	A	619.4	PASS	1	47	1	BCL6	nonsynonymous SNV	.	.	.	.	.	.	.	.	.	.	.	.	.	.	.	.	.	.	.	.	.	.	.	.	.	.	.	.	.	.	.	.	.	.	.	.	.	.
3	187446313	rs137878288	G	A	41	PASS	1	358	1	BCL6	nonsynonymous SNV	COSM3591104	1(skin)	not provided	not_specified	RCV000120203.1	MedGen	CN169374	0.0002	.	0.0014	.	.	.	0.0011	0.0004	0.0008	0	0.0005	0.0017	0.0036	0	0.0014	0.0002	0.002	.	.	0.0011	0.0005	0.0012	0	0	0.0005	0.0018	0.0013	6.56e-05	0.0007	0.0001	0.0024
3	187447463	rs529677174	G	A	417.3	PASS	1	4190929	1	BCL6	nonsynonymous SNV	.	.	.	.	.	.	.	0.0002	0.0008	.	.	.	.	2.48e-05	9.68e-05	0	0	0	3.01e-05	0	0	.	.	.	.	.	1.63e-05	0.0001	0	0	0	0	1.79e-05	0	0	6.47e-05	0	0
3	187449515	rs372779365	C	T	226.3	PASS	1	4197155	1	BCL6	nonsynonymous SNV	COSM1042459	1(endometrium)	.	.	.	.	.	0.0002	.	.	0.001	.	.	6.62e-05	0	0	0	0	0.0001	0	0	0.0001	.	0.0001	.	.	4.07e-05	0	0	0	5.8e-05	0	8.09e-05	0	0	3.23e-05	0	0
3	187449516	rs551620719	G	A	578.7	PASS	1	116	1	BCL6	nonsynonymous SNV	COSM3332950	1(haematopoietic_and_lymphoid_tissue)	.	.	.	.	.	0.0002	.	.	.	.	0.001	2.48e-05	0	8.67e-05	0	0	1.51e-05	0	6.07e-05	.	.	.	.	.	1.63e-05	0	2.98e-05	0	0	0	1.8e-05	0	3.25e-05	.	.	.
3	188123972	rs183529256	C	T	2256.7	PASS	1	830	1	LPP	nonsynonymous SNV	.	.	.	.	.	.	.	0.0002	.	.	.	0.001	.	8.24e-05	0.0002	8.64e-05	0.0001	0	7.49e-05	0	6.06e-05	0.0002	0.0002	0.0001	.	.	0.0002	0.0005	0.0003	0	5.8e-05	0	0.0002	0	6.5e-05	0.0002	0.0003	0
3	188327019	rs149437411	C	T	2804.6	PASS	6	1257;1472;561;751;002;4177987	1,1,1,1,1,1	LPP	nonsynonymous SNV	COSM1213638	1(large_intestine)	.	.	.	.	.	0.0004	.	.	0.001	0.001	.	0.0023	0.0004	0.0007	0.0001	0.0015	0.0038	0.0022	0.0001	0.0021	0.0002	0.003	.	.	0.0019	0.0002	0.0009	0.0001	0.0001	0.0011	0.0035	0.0024	0.0003	0.0016	0.0007	0
3	188327406	.	A	G	360.9	PASS	1	321	1	LPP	nonsynonymous SNV	.	.	.	.	.	.	.	.	.	.	.	.	.	.	.	.	.	.	.	.	.	.	.	.	.	.	.	.	.	.	.	.	.	.	.	.	.	.
3	188592145	rs9830664	G	A	839.9	PASS	7	032;034;063;1047;509;715;4128970	1,1,1,1,1,1,1	LPP	nonsynonymous SNV	.	.	.	.	.	.	.	0.0012	.	0.0029	.	0.004	.	0.002	0.0005	0.0033	0	0.0015	0.0028	0.0022	0.0001	0.0021	0.0009	0.0027	.	.	0.0021	0.0005	0.0034	0.0001	0	0.0015	0.003	0.004	9.75e-05	0.0018	0.0006	0.0036
3	189526266	.	T	A	374.2	PASS	1	366	1	TP63	nonsynonymous SNV	.	.	.	.	.	.	.	.	.	.	.	.	.	.	.	.	.	.	.	.	.	.	.	.	.	.	.	.	.	.	.	.	.	.	.	.	.	.
3	192516717	.	C	G	921.2	PASS	1	654	1	MB21D2	nonsynonymous SNV	.	.	.	.	.	.	.	.	.	.	.	.	.	.	.	.	.	.	.	.	.	.	.	.	.	.	.	.	.	.	.	.	.	.	.	.	.	.
3	192516851	.	A	C	309.7	PASS	1	4160069	1	MB21D2	nonsynonymous SNV	.	.	.	.	.	.	.	.	.	.	.	.	.	.	.	.	.	.	.	.	.	.	.	.	.	.	.	.	.	.	.	.	.	.	.	.	.	.
3	192517239	.	T	C	326.2	PASS	1	122	1	MB21D2	nonsynonymous SNV	.	.	.	.	.	.	.	.	.	.	.	.	.	.	.	.	.	.	.	.	.	.	.	.	.	.	.	.	.	.	.	.	.	.	.	.	.	.
3	192517304	rs1472341110	A	G	409	PASS	1	769	1	MB21D2	nonsynonymous SNV	COSM4116093	1(stomach)	.	.	.	.	.	.	.	.	.	.	.	.	.	.	.	.	.	.	.	.	.	.	.	.	.	.	.	.	.	.	.	.	.	.	.	.
3	195481129	rs144662307	C	A	735	PASS	4	1237;284;762;084	1,1,1,1	MUC4	stopgain	.	.	.	.	.	.	.	0.0006	.	.	.	0.003	.	0.0007	0	0.0012	0	0	0.001	0	0.0003	0.0007	.	0.001	.	.	0.0007	6.55e-05	0.0008	0.0024	0	0	0.0009	0.0005	0.0004	0.0005	0.0005	0
3	195486123	rs149016812	G	A	2574.9	PASS	2	1059;1256	1,1	MUC4	nonsynonymous SNV	.	.	.	.	.	.	.	0.0026	0.0015	0.0043	0.002	0.002	0.0041	0.0009	0.0004	0.001	0.0001	0	0.0011	0	0.0016	0.0006	.	0.0009	.	.	0.001	0.0003	0.0015	0	5.8e-05	0	0.0011	0.0018	0.0016	0.0006	0.0003	0
3	195490414	rs142108900	T	G	397.9	PASS	4	091;1185;1297;1164	1,1,1,1	MUC4	nonsynonymous SNV	.	.	.	.	.	.	.	0.0002	0.0008	.	.	.	.	0.0011	0.0026	0.0022	0	0	0.0012	0	0.0003	0.0006	0.0011	0.0003	.	.	0.0006	0.0011	0.0011	0.0014	0	5.28e-05	0.0005	0.0023	7.7e-05	0.0006	0.0015	0
3	195492197	rs1352961533	C	G	443.8	PASS	1	474	1	MUC4	nonsynonymous SNV	.	.	.	.	.	.	.	.	.	.	.	.	.	.	.	.	.	.	.	.	.	.	.	.	.	.	.	.	.	.	.	.	.	.	.	.	.	.
3	195496005	rs147627958	T	C	366.3	PASS	4	199;591;4124542;4194891	1,1,1,1	MUC4	nonsynonymous SNV	.	.	.	.	.	.	.	0.0002	.	.	.	0.001	.	0.0002	0	8.85e-05	0	0	0.0003	0	0	0.0003	.	0.0005	.	.	0.0001	0	0.0001	0	0	4.51e-05	0.0002	0.0004	0	0.0002	0	0
3	195498672	rs1395586960	G	A	943.6	PASS	1	305	1	MUC4	stopgain	.	.	.	.	.	.	.	.	.	.	.	.	.	.	.	.	.	.	.	.	.	.	.	.	.	.	.	.	.	.	.	.	.	.	.	.	.	.
3	195792376	rs539830157	T	C	915.4	PASS	4	1294;277;680;764	1,1,1,1	TFRC	nonsynonymous SNV	.	.	.	.	.	.	.	0.0008	.	0.0029	.	0.002	.	0.0001	9.61e-05	0.0009	0	0	0.0001	0	0	.	.	.	.	.	0.0002	0.0001	0.0009	0	0	0	0.0001	0.0004	0	.	.	.
4	1806131	rs17881656	T	C	1760.6	PASS	10	124;147;1567;264;874;4104105;4107990;4124795;4169012;4190929	1,1,1,1,1,1,1,1,1,1	FGFR3	nonsynonymous SNV	COSM6166952;COSM724	1(haematopoietic_and_lymphoid_tissue);2(urinary_tract);1(skin);1(lung)	other|Likely benign	not_specified|not_provided	RCV000121079.3|RCV000442867.1	MedGen|MedGen	CN169374|CN221809	0.0008	.	0.0014	.	0.003	.	0.0031	0.0006	0.0024	0	0.0005	0.0049	0.0033	6.4e-05	0.0036	0.0009	0.005	.	.	0.0033	0.0006	0.0027	0.0007	0	0.0008	0.0058	0.0038	0.0001	0.0027	0.0009	0.0048
4	25664173	.	C	A	267.5	PASS	1	4121621	1	SLC34A2	stopgain	.	.	.	.	.	.	.	.	.	.	.	.	.	.	.	.	.	.	.	.	.	.	.	.	.	.	.	.	.	.	.	.	.	.	.	.	.	.
4	25674739	rs138755203	C	T	495.5	PASS	1	4177842	1	SLC34A2	nonsynonymous SNV	.	.	.	.	.	.	.	0.0002	.	.	.	0.001	.	4.12e-05	0	0.0002	0	0	4.5e-05	0	0	0.0001	0.0002	.	.	.	6.09e-05	0	0.0003	0	5.8e-05	0	2.69e-05	0	0	0.0001	0.0002	0.0012
4	40103992	.	CAAGT	C	1411.1	PASS	1	1535	1	N4BP2	frameshift deletion
4	40113779	rs377188372	C	G	1357.8	PASS	4	048;1196;642;4166706	1,1,1,1	N4BP2	nonsynonymous SNV	.	.	.	.	.	.	.	0.0006	.	0.0014	.	0.002	.	0.0001	9.7e-05	0.0008	0	0	0.0001	0	0	0.0001	.	0.0001	.	.	0.0002	0	0.0013	0	0	0	9.24e-05	0.0006	0	3.23e-05	0	0.0012
4	40144356	.	C	G	725.4	PASS	1	523	1	N4BP2	nonsynonymous SNV	.	.	.	.	.	.	.	.	.	.	.	.	.	.	.	.	.	.	.	.	.	.	.	.	.	.	.	.	.	.	.	.	.	.	.	.	.	.
4	40144434	.	G	C	112.3	PASS	1	4110120	1	N4BP2	nonsynonymous SNV	.	.	.	.	.	.	.	.	.	.	.	.	.	.	.	.	.	.	.	.	.	.	.	.	.	.	.	.	.	.	.	.	.	.	.	.	.	.
4	41750395	.	T	G	278.1	PASS	1	1416	1	PHOX2B	nonsynonymous SNV	.	.	.	.	.	.	.	.	.	.	.	.	.	.	.	.	.	.	.	.	.	.	.	.	.	.	.	.	.	.	.	.	.	.	.	.	.	.
4	54319120	rs368570756	C	T	768.2	PASS	1	4136702	1	FIP1L1	nonsynonymous SNV	.	.	.	.	.	.	.	0.0002	.	.	0.001	.	.	1.65e-05	0	0	0	0	3e-05	0	0	0.0001	.	0.0001	.	.	1.23e-05	0	0	0	5.8e-05	0	1.83e-05	0	0	.	.	.
4	54880005	rs1184296732	T	C	422	PASS	1	4105746	1	CHIC2	nonsynonymous SNV	COSM1201052	1(large_intestine)	.	.	.	.	.	.	.	.	.	.	.	.	.	.	.	.	.	.	.	.	.	.	.	.	.	.	.	.	.	.	.	.	.	.	.	.
4	55961103	rs140041720	C	T	2150.4	PASS	1	11	1	KDR	nonsynonymous SNV	COSM3780305	1(pancreas);2(large_intestine)	.	.	.	.	.	0.001	.	0.0014	0.004	.	.	0.0002	9.61e-05	8.68e-05	0.0021	0	3e-05	0	0	.	.	.	.	.	0.0002	6.54e-05	0.0002	0	0.0025	0	3.59e-05	0	3.25e-05	0.0003	0.0003	0
4	55964925	rs149745504	G	A	1502.4	PASS	3	030;131;626	1,1,1	KDR	nonsynonymous SNV	COSM94566	1(lung)	.	.	.	.	.	0.001	0.0038	.	.	.	.	0.0011	0.004	0.0031	0.0001	0	0.0008	0.0011	6.06e-05	0.0017	0.0036	0.0007	.	.	0.0012	0.0046	0.0021	0.0082	5.8e-05	0	0.0004	0.002	0	0.0018	0.0045	0
4	55968531	.	G	A	352.7	PASS	1	4166503	1	KDR	nonsynonymous SNV	.	.	.	.	.	.	.	.	.	.	.	.	.	.	.	.	.	.	.	.	.	.	.	.	.	.	.	.	.	.	.	.	.	.	.	.	.	.
4	55972029	rs55716939	C	T	633.1	PASS	2	4110996;4160468	1,1	KDR	nonsynonymous SNV	COSM4125180	1(stomach)	not provided	not_specified	RCV000121296.1	MedGen	CN169374	0.0004	.	0.0014	.	0.001	.	0.0016	0.0003	0.0006	0	0.0002	0.0027	0.0011	0.0002	0.0016	0.0005	0.0022	.	.	0.0015	0.0003	0.0006	0.0002	0	0.0001	0.0028	0.0031	0.0003	0.0015	0.0002	0.0012
4	55984888	rs201719457	C	T	792.8	PASS	3	1345;138;283	1,1,1	KDR	nonsynonymous SNV	COSM3428557	1(soft_tissue);1(skin);1(large_intestine)	.	.	.	.	.	0.0004	.	0.0029	.	.	.	0.0003	0	0.0015	0	0	0.0002	0.0022	6.06e-05	.	.	.	0.011	.	0.0004	0	0.0018	0	5.8e-05	0	0.0002	0.0007	6.5e-05	9.69e-05	0	0.0012
4	73941995	rs144043898	G	C	848.4	PASS	2	138;4158769	1,1	ANKRD17	nonsynonymous SNV	.	.	.	.	.	.	.	0.0004	.	.	.	0.002	.	0.0009	9.81e-05	0.0002	0	0.0002	0.0016	0	0.0001	0.001	.	0.0015	.	.	0.0009	0.0001	0.0002	0.0001	0	0.0002	0.0017	0	0.0002	0.0007	0.0001	0.0012
4	74000880	.	G	A	546.8	PASS	1	4182393	1	ANKRD17	nonsynonymous SNV	.	.	.	.	.	.	.	.	.	.	.	.	.	.	.	.	.	.	.	.	.	.	.	.	.	.	.	.	.	.	.	.	.	.	.	.	.	.
4	83861100	rs140374560	A	G	481.5	PASS	1	473	1	LIN54	nonsynonymous SNV	.	.	.	.	.	.	.	0.0006	.	0.0014	.	.	0.002	0.0012	9.66e-05	0.0014	0	0	0.001	0.0022	0.0035	0.0013	.	0.002	.	0.016	0.0009	6.6e-05	0.0005	0	0	0	0.0009	0.0023	0.0032	0.0004	0	0.0024
4	83867599	rs34929292	G	C	1254.7	PASS	2	887;026	1,1	LIN54	nonsynonymous SNV	.	.	.	.	.	.	.	0.0012	.	0.0014	.	0.002	0.0031	0.0015	9.61e-05	0.0012	0	0	0.0018	0.0022	0.0027	0.0008	0.0005	0.001	.	0.016	0.0016	6.53e-05	0.0008	0.0101	5.8e-05	0	0.0013	0.0033	0.0032	0.001	0.0002	0.0036
4	87622436	.	C	T	1897.5	PASS	1	18	1	PTPN13	nonsynonymous SNV	COSM735427	1(lung)	.	.	.	.	.	.	.	.	.	.	.	.	.	.	.	.	.	.	.	.	.	.	.	.	.	.	.	.	.	.	.	.	.	.	.	.
4	87643478	rs61757789	G	C	595.2	PASS	3	1425;4183924;4190231	1,1,1	PTPN13	nonsynonymous SNV	.	.	.	.	.	.	.	0.0006	.	.	.	0.003	.	0.0028	0.0003	0.0003	0	0.0044	0.0044	0.0044	0.0002	0.0023	0.0003	0.0033	.	.	0.0027	0.0003	0.0005	0.0019	0	0.0044	0.0044	0.0038	0.0001	0.0027	0.0007	0
4	87655513	rs202038172	G	A	275.2	PASS	1	584	1	PTPN13	nonsynonymous SNV	.	.	.	.	.	.	.	0.0004	.	0.0029	.	.	.	7.33e-05	0	0.0013	0	0	8e-05	0	0	.	.	.	.	.	0.0002	9.94e-05	0.001	0.0001	0	0	1.37e-05	0.0007	0	3.23e-05	0	0.0012
4	87656819	.	T	C	358.2	PASS	1	1403	1	PTPN13	nonsynonymous SNV	.	.	.	.	.	.	.	.	.	.	.	.	.	.	.	.	.	.	.	.	.	.	.	.	.	.	.	.	.	.	.	.	.	.	.	.	.	.
4	87683889	rs186651045	C	T	1600.4	PASS	3	053;152;4147968	1,1,1	PTPN13	nonsynonymous SNV	.	.	.	.	.	.	.	0.0004	.	0.0029	.	.	.	0.0015	0.0005	0.0002	0	0.0002	0.0022	0.0023	0.0014	0.0012	0.0005	0.0016	.	.	0.0013	0.0005	0.0003	0	0	0.0002	0.0024	0.0013	0.0008	0.0009	0.0005	0
4	87692496	rs200197835	G	A	786.4	PASS	3	1468;4112447;4119027	1,1,1	PTPN13	nonsynonymous SNV	.	.	.	.	.	.	.	0.0004	.	0.0029	.	.	.	0.0023	0.0002	0.004	0	0.0003	0.0028	0	0.0025	0.0014	.	0.0021	.	.	0.0014	0.0002	0.001	0.0023	0	0	0.0018	0.0024	0.002	0.0005	0	0.0024
4	87707057	rs201581281	G	A,C	455.8	PASS	2	1317;4139483	1,1	PTPN13	nonsynonymous SNV	.	.	.	.	.	.	.	.	.	.	.	.	.	.	.	.	.	.	.	.	.	.	.	.	.	.	.	.	.	.	.	.	.	.	.	.	.	.
4	87732221	rs182154840	G	A	1359	PASS	3	1271;375;769	1,1,1	PTPN13	nonsynonymous SNV	.	.	.	.	.	.	.	0.0004	.	0.0014	.	0.001	.	0.0005	0.0003	0.0003	0	0	0.0008	0	6.21e-05	0.001	0.0003	0.0013	.	.	0.0005	0.0003	0.0003	0	0	4.49e-05	0.001	0.0002	0.0001	0.0012	0.0003	0.0012
4	87732228	rs61730643	G	T	697.9	PASS	1	4152611	1	PTPN13	nonsynonymous SNV	COSM5711936	1(large_intestine)	.	.	.	.	.	0.0002	.	.	.	0.001	.	0.0009	0.0003	0	0	0.0003	0.0015	0	0	0.001	0.0003	0.0013	.	.	0.0008	0.0005	0	0	0	0.0003	0.0016	0.0002	0	0.0011	0.0007	0
4	87967908	.	T	C	434.7	PASS	1	4159170	1	AFF1	nonsynonymous SNV	.	.	.	.	.	.	.	.	.	.	.	.	.	.	.	.	.	.	.	.	.	.	.	.	.	.	.	.	.	.	.	.	.	.	.	.	.	.
4	87968733	.	C	T	541.2	PASS	1	4120879	1	AFF1	nonsynonymous SNV	.	.	.	.	.	.	.	.	.	.	.	.	.	.	.	.	.	.	.	.	.	.	.	.	.	.	.	.	.	.	.	.	.	.	.	.	.	.
4	88016121	rs200125007	C	T	673.7	PASS	1	684	1	AFF1	nonsynonymous SNV	.	.	.	.	.	.	.	0.0004	.	.	.	0.002	.	1.68e-05	0	0	0	0	3.05e-05	0	0	.	.	.	.	.	2.03e-05	6.54e-05	2.98e-05	0	0	0	2.69e-05	0	0	.	.	.
4	88035946	rs61734706	C	T	341.9	PASS	1	447	1	AFF1	nonsynonymous SNV	.	.	.	.	.	.	.	0.0002	.	0.0014	.	.	.	0.0003	9.93e-05	0.0003	0	0	0.0004	0	0	0.0005	0.0002	0.0007	.	.	0.0002	0.0001	0.0002	0.0005	0	0	0.0004	0.0002	3.26e-05	0.0005	0.0006	0
4	99273636	.	G	C	234.4	PASS	1	4175941	1	RAP1GDS1	nonsynonymous SNV	.	.	.	.	.	.	.	.	.	.	.	.	.	.	.	.	.	.	.	.	.	.	.	.	.	.	.	.	.	.	.	.	.	.	.	.	.	.
4	99342451	rs187721964	G	A	350.4	PASS	1	1339	1	RAP1GDS1	nonsynonymous SNV	.	.	.	.	.	.	.	0.0002	.	.	0.001	.	.	0.0001	0	0	0.0008	0	9e-05	0	6.07e-05	.	.	.	.	.	0.0001	0	0	0.0001	0.0011	0	6.28e-05	0	3.27e-05	3.23e-05	0	0
4	106156255	.	G	T	396.2	PASS	1	4170577	1	TET2	nonsynonymous SNV	.	.	.	.	.	.	.	.	.	.	.	.	.	.	.	.	.	.	.	.	.	.	.	.	.	.	.	.	.	.	.	.	.	.	.	.	.	.
4	106157472	.	T	A	391.2	PASS	1	4197438	1	TET2	stopgain	.	.	.	.	.	.	.	.	.	.	.	.	.	.	.	.	.	.	.	.	.	.	.	.	.	.	.	.	.	.	.	.	.	.	.	.	.	.
4	109000649	rs151041212	C	T	937.3	PASS	1	338	1	LEF1	nonsynonymous SNV	.	.	.	.	.	.	.	0.0004	.	0.0014	.	0.001	.	0.0007	0	0.0003	0.0002	0	0.0003	0	0.0033	0.0002	.	0.0002	.	.	0.0006	0	0.0002	0	0.0002	4.49e-05	0.0003	0.0005	0.0028	0.0002	0	0.0012
4	109010311	.	G	T	615.3	PASS	1	174	1	LEF1	nonsynonymous SNV	.	.	.	.	.	.	.	.	.	.	.	.	.	.	.	.	.	.	.	.	.	.	.	.	.	.	.	.	.	.	.	.	.	.	.	.	.	.
4	109010339	rs138774973	C	A	1023.9	PASS	2	297;830	1,1	LEF1	nonsynonymous SNV	.	.	.	.	.	.	.	0.0004	.	.	.	0.002	.	0.0006	0.0002	0.0006	0	0	0.001	0	6.06e-05	0.0008	.	0.0013	.	.	0.0007	0.0002	0.0007	0.0001	0	0	0.0013	0.0005	0.0001	0.0005	0	0
4	109084837	.	G	A	340.2	PASS	1	197	1	LEF1	nonsynonymous SNV	.	.	.	.	.	.	.	.	.	.	.	.	.	.	.	.	.	.	.	.	.	.	.	.	.	.	.	.	.	.	.	.	.	.	.	.	.	.
4	126238938	.	G	T	523.9	PASS	1	287	1	FAT4	nonsynonymous SNV	.	.	.	.	.	.	.	.	.	.	.	.	.	.	.	.	.	.	.	.	.	.	.	.	.	.	.	.	.	.	.	.	.	.	.	.	.	.
4	126239115	.	G	A	762.3	PASS	1	147	1	FAT4	nonsynonymous SNV	.	.	.	.	.	.	.	.	.	.	.	.	.	.	.	.	.	.	.	.	.	.	.	.	.	.	.	.	.	.	.	.	.	.	.	.	.	.
4	126240145	.	C	A	403.3	PASS	1	4128852	1	FAT4	nonsynonymous SNV	.	.	.	.	.	.	.	.	.	.	.	.	.	.	.	.	.	.	.	.	.	.	.	.	.	.	.	.	.	.	.	.	.	.	.	.	.	.
4	126240201	rs886241458	G	A	587.7	PASS	1	1052	1	FAT4	nonsynonymous SNV	.	.	.	.	.	.	.	.	.	.	.	.	.	.	.	.	.	.	.	.	.	.	.	.	.	.	.	.	.	.	.	.	.	.	.	.	.	.
4	126240270	.	G	A	1677.2	PASS	1	70	1	FAT4	nonsynonymous SNV	.	.	.	.	.	.	.	.	.	.	.	.	.	.	.	.	.	.	.	.	.	.	.	.	.	.	.	.	.	.	.	.	.	.	.	.	.	.
4	126241735	rs201934636	T	C	2452.6	PASS	1	595	1	FAT4	nonsynonymous SNV	.	.	.	.	.	.	.	0.0002	.	.	.	0.001	.	0.0002	0	0	0	0	0.0003	0	0	0.0003	.	0.0005	.	.	0.0002	0.0001	0	0	0	0	0.0005	0.0004	0	6.46e-05	0	0
4	126329821	rs139716832	A	G	916.1	PASS	1	186	1	FAT4	nonsynonymous SNV	COSM5989822;COSM5989823;COSM5989824	1(haematopoietic_and_lymphoid_tissue)	.	.	.	.	.	0.0004	.	0.0014	.	0.001	.	0.0005	0.0002	0.0002	0	0.0002	0.0008	0	0	0.0008	0.0002	0.001	.	.	0.0005	0.0001	0.0003	0	0	0	0.001	0.0002	0	0.0005	0.0005	0
4	126336168	rs188126059	T	C	2714	PASS	1	598	1	FAT4	nonsynonymous SNV	.	.	.	.	.	.	.	0.0004	.	0.0014	.	0.001	.	7.42e-05	0	0.0002	0	0	0.0001	0	0	0.0001	.	0.0001	.	.	7.32e-05	0	5.96e-05	0	0	0	0.0001	0.0002	0	6.46e-05	0	0.0012
4	126336546	.	T	A	761.9	PASS	1	765	1	FAT4	nonsynonymous SNV	.	.	.	.	.	.	.	.	.	.	.	.	.	.	.	.	.	.	.	.	.	.	.	.	.	.	.	.	.	.	.	.	.	.	.	.	.	.
4	126371682	.	T	G	617.3	PASS	1	273	1	FAT4	nonsynonymous SNV	.	.	.	.	.	.	.	.	.	.	.	.	.	.	.	.	.	.	.	.	.	.	.	.	.	.	.	.	.	.	.	.	.	.	.	.	.	.
4	126372789	.	A	C	1813.8	PASS	1	442	1	FAT4	nonsynonymous SNV	.	.	.	.	.	.	.	.	.	.	.	.	.	.	.	.	.	.	.	.	.	.	.	.	.	.	.	.	.	.	.	.	.	.	.	.	.	.
4	126373906	.	G	A	332.5	PASS	1	329	1	FAT4	nonsynonymous SNV	.	.	.	.	.	.	.	.	.	.	.	.	.	.	.	.	.	.	.	.	.	.	.	.	.	.	.	.	.	.	.	.	.	.	.	.	.	.
4	126412333	rs138173652	G	A	816.6	PASS	3	005;048;352	1,1,1	FAT4	nonsynonymous SNV	COSM3009859;COSM3009860	1(prostate);1(large_intestine)	.	.	.	.	.	0.0004	.	.	.	0.002	.	9.11e-05	0	8.66e-05	0	0	0.0001	0	6.06e-05	0.0001	.	0.0001	.	.	0.0001	0	0.0003	0	0	0	0.0001	0	6.5e-05	6.46e-05	0	0.0012
4	135121247	.	G	A	2052.2	PASS	1	1271	1	PABPC4L	stopgain	.	.	.	.	.	.	.	.	.	.	.	.	.	.	.	.	.	.	.	.	.	.	.	.	.	.	.	.	.	.	.	.	.	.	.	.	.	.
4	187517711	.	C	A	304.7	PASS	1	4174905	1	FAT1	nonsynonymous SNV	COSM5517609;COSM5517610	1(biliary_tract)	.	.	.	.	.	.	.	.	.	.	.	.	.	.	.	.	.	.	.	.	.	.	.	.	.	.	.	.	.	.	.	.	.	.	.	.
4	187517774	.	T	G	89.6	PASS	1	193	1	FAT1	nonsynonymous SNV	.	.	.	.	.	.	.	.	.	.	.	.	.	.	.	.	.	.	.	.	.	.	.	.	.	.	.	.	.	.	.	.	.	.	.	.	.	.
4	187517835	.	A	G	395.2	PASS	1	4136095	1	FAT1	nonsynonymous SNV	.	.	.	.	.	.	.	.	.	.	.	.	.	.	.	.	.	.	.	.	.	.	.	.	.	.	.	.	.	.	.	.	.	.	.	.	.	.
4	187521495	rs147863702	T	C	1828	PASS	1	361	1	FAT1	nonsynonymous SNV	.	.	.	.	.	.	.	0.0004	.	.	.	0.002	.	5.14e-05	0	0	0	0	9.22e-05	0	0	.	.	.	.	.	2.05e-05	0	0	0	0	0	4.53e-05	0	0	3.23e-05	0	0
4	187522566	rs201279606	T	C	1820.9	PASS	7	020;149;168;561;751;1078;473	1,1,1,1,1,1,1	FAT1	nonsynonymous SNV	.	.	.	.	.	.	.	0.0004	.	0.0029	.	.	.	0.0006	0.0001	0.0022	0	0	0.0008	0.0012	0	0.0004	0.0003	0.0005	.	.	0.0008	0.0002	0.0027	0.0004	0	4.49e-05	0.0008	0.0007	0	0.0005	0	0.0012
4	187525667	.	T	A	287.7	PASS	1	4189200	1	FAT1	nonsynonymous SNV	.	.	.	.	.	.	.	.	.	.	.	.	.	.	.	.	.	.	.	.	.	.	.	.	.	.	.	.	.	.	.	.	.	.	.	.	.	.
4	187531074	rs199989457	C	T	2095.1	PASS	1	396	1	FAT1	nonsynonymous SNV	COSM3131488;COSM3131489	1(large_intestine)	.	.	.	.	.	0.0002	.	.	.	.	0.001	0.0006	0.0002	0.0003	0.0001	0	0.0003	0.0022	0.0025	0.0002	.	0.0002	.	.	0.0005	6.54e-05	0.0003	0	5.8e-05	0	0.0003	0.0004	0.0025	0.0003	0.0003	0
4	187535402	rs1003917683	T	C	2147.8	PASS	1	41	1	FAT1	nonsynonymous SNV	.	.	.	.	.	.	.	.	.	.	.	.	.	.	.	.	.	.	.	.	.	.	.	.	.	.	.	.	.	.	.	.	.	.	.	.	.	.
4	187539327	rs765816122	T	A	4199.2	PASS	1	291	1	FAT1	nonsynonymous SNV	.	.	.	.	.	.	.	.	.	.	.	.	.	.	.	.	.	.	.	.	.	.	.	.	.	.	.	.	.	.	.	.	.	.	.	.	.	.
4	187539653	rs201751862	G	A	359.1	PASS	1	1078	1	FAT1	nonsynonymous SNV	COSM4683505;COSM4683506	1(large_intestine)	.	.	.	.	.	0.0002	.	.	.	0.001	.	9.94e-05	0	0.0003	0	0	0.0001	0	0	0.0001	.	0.0001	.	.	8.94e-05	0	0.0002	0	5.8e-05	0	0.0001	0	3.25e-05	3.23e-05	0	0
4	187539783	rs200149452	C	T	1643.2	PASS	1	270	1	FAT1	nonsynonymous SNV	.	.	.	.	.	.	.	0.0008	0.0008	.	0.002	0.001	.	0.0005	0.0012	0.0012	0.0005	0	0.0005	0.0033	6.06e-05	0.0003	0.0011	.	.	.	0.0006	0.001	0.0017	0.0002	0.0005	0	0.0005	0.0013	6.5e-05	0.0006	0.0017	0.0024
4	187540095	rs183730071	A	G	2304.9	PASS	1	398	1	FAT1	nonsynonymous SNV	.	.	.	.	.	.	.	0.0004	.	.	0.001	0.001	.	0.0002	0.0001	0.0006	0	0.0002	0.0002	0.0011	0	0.0001	.	0.0001	.	.	0.0003	6.55e-05	0.0007	0.0001	0	4.49e-05	0.0003	0.0013	3.25e-05	0.0002	0.0003	0
4	187540610	rs201363601	G	A	3005.9	PASS	2	862;868	1,1	FAT1	nonsynonymous SNV	.	.	.	.	.	.	.	0.0002	.	.	.	0.001	.	0.0007	0.0002	0.0004	0.0026	0	0.0008	0	0.0002	0.0004	.	0.0006	.	.	0.0007	0.0003	0.0004	0	0.0022	0.0004	0.0008	0.0015	0.0002	0.0006	0.0001	0.0012
4	187540970	.	G	A	538.7	PASS	1	544	1	FAT1	nonsynonymous SNV	.	.	.	.	.	.	.	.	.	.	.	.	.	.	.	.	.	.	.	.	.	.	.	.	.	.	.	.	.	.	.	.	.	.	.	.	.	.
4	187541319	.	AT	A	376.6	PASS	1	4124188	1	FAT1	frameshift deletion
4	187541678	rs377498159	C	T	800.7	PASS	1	544	1	FAT1	nonsynonymous SNV	.	.	.	.	.	.	.	0.0002	0.0008	.	.	.	.	2.48e-05	0.0001	0	0	0	3e-05	0	0	0.0001	0.0003	.	.	.	6.91e-05	0.0002	0	0	0	0.0005	1.79e-05	0.0002	0	6.46e-05	0	0
4	187557301	rs201001818	T	C	1064.6	PASS	1	466	1	FAT1	nonsynonymous SNV	.	.	.	.	.	.	.	0.0002	.	.	.	0.001	.	0.0002	0.0001	0.0003	0	0	0.0003	0.0011	0	0.0002	0.0003	0.0002	.	.	0.0002	6.55e-05	0.0001	0	0	4.48e-05	0.0003	0.0004	0	0.0002	0	0
4	187557782	rs200252550	G	A	257.5	PASS	1	4199996	1	FAT1	nonsynonymous SNV	COSM1729882;COSM1729883	2(haematopoietic_and_lymphoid_tissue);1(liver)	.	.	.	.	.	0.0002	.	.	.	.	0.001	0.0005	0.0002	0	0	0	0.0007	0	0.0008	0.0007	.	0.001	.	.	0.0004	0.0002	0	0	0	0.0001	0.0007	0.0004	0.0005	0.0004	0	0
4	187627804	rs181661569	C	G	450.9	PASS	1	4128355	1	FAT1	nonsynonymous SNV	.	.	.	.	.	.	.	0.0002	.	.	0.001	.	.	8.28e-06	0	0	0	0	1.5e-05	0	0	.	.	.	.	.	2.03e-05	0	2.98e-05	0	0.0001	0	1.79e-05	0	0	.	.	.
4	187627917	.	A	C	1803.2	PASS	1	174	1	FAT1	nonsynonymous SNV	.	.	.	.	.	.	.	.	.	.	.	.	.	.	.	.	.	.	.	.	.	.	.	.	.	.	.	.	.	.	.	.	.	.	.	.	.	.
4	187628853	rs370215067	T	C	1527.6	PASS	2	1465;664	1,1	FAT1	nonsynonymous SNV	COSM3392822;COSM3392823	1(pancreas)	.	.	.	.	.	0.0002	0.0008	.	.	.	.	0.0001	0.0015	8.65e-05	0	0	3e-05	0	0	0.0002	0.0008	.	.	.	0.0001	0.0012	0.0001	0.0002	0	0	2.69e-05	0	6.5e-05	0.0006	0.0022	0
4	187629727	rs375942121	G	C	426.6	PASS	1	1167	1	FAT1	nonsynonymous SNV	.	.	.	.	.	.	.	0.0002	.	.	.	.	0.001	0.0002	0.0001	0	0	0	0.0001	0	0.0008	0.0001	.	0.0001	.	.	0.0002	0	8.93e-05	0	0	0	0.0002	0.0005	0.0009	0.0002	0.0001	0
4	187630567	.	C	G	295.8	PASS	1	4163741	1	FAT1	nonsynonymous SNV	.	.	.	.	.	.	.	.	.	.	.	.	.	.	.	.	.	.	.	.	.	.	.	.	.	.	.	.	.	.	.	.	.	.	.	.	.	.
5	10973710	.	T	C	201.7	PASS	1	1229	1	CTNND2	nonsynonymous SNV	.	.	.	.	.	.	.	.	.	.	.	.	.	.	.	.	.	.	.	.	.	.	.	.	.	.	.	.	.	.	.	.	.	.	.	.	.	.
5	11111041	.	C	T	301.6	PASS	1	1254	1	CTNND2	nonsynonymous SNV	.	.	.	.	.	.	.	.	.	.	.	.	.	.	.	.	.	.	.	.	.	.	.	.	.	.	.	.	.	.	.	.	.	.	.	.	.	.
5	11199657	.	A	T	456.4	PASS	1	4190231	1	CTNND2	nonsynonymous SNV	.	.	.	.	.	.	.	.	.	.	.	.	.	.	.	.	.	.	.	.	.	.	.	.	.	.	.	.	.	.	.	.	.	.	.	.	.	.
5	11346514	rs201675268	G	A	317.3	PASS	1	4171706	1	CTNND2	nonsynonymous SNV	.	.	.	.	.	.	.	0.0004	0.0015	.	.	.	.	0.0001	0.0008	0.0003	0.0001	0	0	0	0.0001	0.0002	0.0002	0.0001	.	.	0.0001	0.0011	0.0002	0	0.0003	0	1.13e-05	0.0005	5.29e-05	0.0006	0.0018	0
5	11384828	.	A	G	342.6	PASS	1	4181460	1	CTNND2	nonsynonymous SNV	.	.	.	.	.	.	.	.	.	.	.	.	.	.	.	.	.	.	.	.	.	.	.	.	.	.	.	.	.	.	.	.	.	.	.	.	.	.
5	11397162	rs141302945	G	A	1177.4	PASS	1	1195	1	CTNND2	nonsynonymous SNV	.	.	.	.	.	.	.	0.0002	0.0008	.	.	.	.	6.6e-05	0.0002	0	0.0001	0	7.51e-05	0	0	0.0001	0.0002	.	.	.	4.88e-05	0.0002	0.0001	0	5.8e-05	0	3.59e-05	0	0	6.46e-05	0	0
5	11397210	.	T	A	935.8	PASS	1	297	1	CTNND2	nonsynonymous SNV	.	.	.	.	.	.	.	.	.	.	.	.	.	.	.	.	.	.	.	.	.	.	.	.	.	.	.	.	.	.	.	.	.	.	.	.	.	.
5	11732279	.	G	C	411.2	PASS	1	4184437	1	CTNND2	nonsynonymous SNV	.	.	.	.	.	.	.	.	.	.	.	.	.	.	.	.	.	.	.	.	.	.	.	.	.	.	.	.	.	.	.	.	.	.	.	.	.	.
5	24492943	.	G	A	680.3	PASS	1	4131213	1	CDH10	nonsynonymous SNV	.	.	.	.	.	.	.	.	.	.	.	.	.	.	.	.	.	.	.	.	.	.	.	.	.	.	.	.	.	.	.	.	.	.	.	.	.	.
5	24509897	rs182867464	G	A	1442.3	PASS	1	361	1	CDH10	nonsynonymous SNV	.	.	.	.	.	.	.	0.0002	0.0008	.	.	.	.	3.3e-05	0	0	0	0	6e-05	0	0	.	.	.	.	.	3.26e-05	0	0	0	0	0	6.29e-05	0	3.27e-05	6.46e-05	0.0001	0
5	24537499	.	C	T	1108.3	PASS	1	171	1	CDH10	nonsynonymous SNV	.	.	.	.	.	.	.	.	.	.	.	.	.	.	.	.	.	.	.	.	.	.	.	.	.	.	.	.	.	.	.	.	.	.	.	.	.	.
5	24537539	rs139913021	G	A	995.5	PASS	3	878;4103570;4125240	1,1,1	CDH10	nonsynonymous SNV	.	.	.	.	.	.	.	0.0002	.	0.0014	.	.	.	0.0004	9.63e-05	0.0003	0	0	0.0006	0	0	0.0008	0.0002	0.001	.	.	0.0005	6.55e-05	0.0004	0.0008	0	0	0.0008	0.0004	0	0.0004	0.0002	0
5	31485012	.	C	T	436.1	PASS	1	4139696	1	DROSHA	nonsynonymous SNV	.	.	.	.	.	.	.	.	.	.	.	.	.	.	.	.	.	.	.	.	.	.	.	.	.	.	.	.	.	.	.	.	.	.	.	.	.	.
5	31515273	rs372990492	C	T	1486.7	PASS	1	7	1	DROSHA	nonsynonymous SNV	.	.	.	.	.	.	.	0.0004	0.0015	.	.	.	.	3.31e-05	0.0004	0	0	0	0	0	0	0.0001	0.0003	.	.	.	2.44e-05	0.0002	0	0	0	0	2.69e-05	0	0	3.23e-05	0.0001	0
5	31521245	rs975072926	T	C	3092.2	PASS	1	165	1	DROSHA	nonsynonymous SNV	.	.	.	.	.	.	.	.	.	.	.	.	.	.	.	.	.	.	.	.	.	.	.	.	.	.	.	.	.	.	.	.	.	.	.	.	.	.
5	35876106	.	C	T	847.6	PASS	1	764	1	IL7R	nonsynonymous SNV	COSM1695580	3(skin)	.	.	.	.	.	.	.	.	.	.	.	.	.	.	.	.	.	.	.	.	.	.	.	.	.	.	.	.	.	.	.	.	.	.	.	.
5	38481977	.	A	G	215.8	PASS	1	4181460	1	LIFR	nonsynonymous SNV	.	.	.	.	.	.	.	.	.	.	.	.	.	.	.	.	.	.	.	.	.	.	.	.	.	.	.	.	.	.	.	.	.	.	.	.	.	.
5	38506614	.	A	G	570.9	PASS	1	49	1	LIFR	nonsynonymous SNV	.	.	.	.	.	.	.	.	.	.	.	.	.	.	.	.	.	.	.	.	.	.	.	.	.	.	.	.	.	.	.	.	.	.	.	.	.	.
5	55236965	rs191125510	A	G	1863.9	PASS	1	1260	1	IL6ST	nonsynonymous SNV	.	.	.	.	.	.	.	0.0002	0.0008	.	.	.	.	4.95e-05	9.61e-05	8.66e-05	0	0	6.01e-05	0	0	0.0001	.	0.0001	.	.	6.1e-05	6.54e-05	0.0002	0	0	4.49e-05	4.48e-05	0.0004	0	.	.	.
5	55250787	rs140433866	G	C	2206.7	PASS	1	663	1	IL6ST	nonsynonymous SNV	COSM6005549	1(prostate)	.	.	.	.	.	0.0008	.	0.0014	.	0.003	.	0.0011	0	0.0003	0	0	0.0018	0.0033	0.0006	0.0007	.	0.001	.	.	0.0011	6.58e-05	0.0003	0.0137	0	0	0.001	0.0013	0.0005	0.0004	0	0.0012
5	55250812	rs199939306	G	A	62.2	PASS	1	1260	1	IL6ST	nonsynonymous SNV	.	.	.	.	.	.	.	0.0002	0.0008	.	.	.	.	4.95e-05	9.73e-05	8.65e-05	0	0	6e-05	0	0	.	.	.	.	.	6.59e-05	6.85e-05	0.0002	0	0	4.54e-05	4.68e-05	0.0004	0	.	.	.
5	55256305	rs141500365	G	A	1218.9	PASS	1	588	1	IL6ST	nonsynonymous SNV	.	.	.	.	.	.	.	0.0002	.	.	.	0.001	.	0.0006	0.0003	0.0002	0	0.0002	0.001	0	0	0.0014	0.0002	0.002	.	.	0.0006	0.0004	0.0005	0.0001	0	8.97e-05	0.0012	0.0002	3.25e-05	0.0005	0.0007	0
5	67522580	.	T	C	218.9	PASS	1	4135813	1	PIK3R1	nonsynonymous SNV	.	.	.	.	.	.	.	.	.	.	.	.	.	.	.	.	.	.	.	.	.	.	.	.	.	.	.	.	.	.	.	.	.	.	.	.	.	.
5	67591254	.	G	T	536.6	PASS	1	4191799	1	PIK3R1	nonsynonymous SNV	.	.	.	.	.	.	.	.	.	.	.	.	.	.	.	.	.	.	.	.	.	.	.	.	.	.	.	.	.	.	.	.	.	.	.	.	.	.
5	98192320	.	A	T	263.4	PASS	1	23	1	CHD1	nonsynonymous SNV	.	.	.	.	.	.	.	.	.	.	.	.	.	.	.	.	.	.	.	.	.	.	.	.	.	.	.	.	.	.	.	.	.	.	.	.	.	.
5	98193990	rs138351327	G	A	1661.1	PASS	3	045;4131744;4144131	1,1,1	CHD1	nonsynonymous SNV	.	.	.	.	.	.	.	0.0006	.	0.0014	.	0.001	0.001	0.0021	0.0004	0.0006	0	0.0036	0.0031	0.0033	0.0004	0.0019	0.0007	0.0026	.	.	0.002	6.54e-05	0.0007	0.0004	0	0.0036	0.0032	0.002	0.0004	0.0032	0.0002	0.0012
5	98216872	rs567874073	T	C	379.2	PASS	1	814	1	CHD1	nonsynonymous SNV	COSM4799699	2(liver)	.	.	.	.	.	0.0002	0.0008	.	.	.	.	1.2e-05	0.0001	0	0	0	0	0	0	.	.	.	.	.	4.41e-06	7.01e-05	0	0	0	0	0	0	0	.	.	.
5	98224802	rs144567251	T	A	927	PASS	4	166;875;4105782;4140531	1,1,1,1	CHD1	nonsynonymous SNV	.	.	.	.	.	.	.	0.0006	.	0.0014	.	0.001	0.001	0.0017	0.0002	0.0008	0	0.0008	0.0026	0.0022	0.0007	0.0021	.	0.0031	.	.	0.0017	0.0004	0.0009	0.0003	0	0.0009	0.003	0.0009	0.0007	0.0053	0.0005	0.0012
5	112102960	rs139196838	C	T	496.7	PASS	1	4124542	1	APC	nonsynonymous SNV	COSM248836	1(pancreas);1(large_intestine)	other|Likely benign|other|Likely pathogenic	Familial_adenomatous_polyposis_1|Hereditary_cancer-predisposing_syndrome|not_specified|Colorectal_cancer\x2c_susceptibility_to	RCV000122769.6|RCV000129141.6|RCV000200967.3|RCV000210128.1	MedGen:OMIM|MedGen:SNOMED_CT|MedGen|MedGen	C2713442:175100|C0027672:699346009|CN169374|C1858438	.	.	.	.	.	.	0.0004	0.0004	0	0	0.0002	0.0006	0	0	0.0009	0.0007	0.001	.	.	0.0004	0.0002	0.0001	0	0	8.97e-05	0.0008	0.0002	0	0.0005	0.0006	0
5	112164557	rs144056494	T	C	601.9	PASS	1	1164	1	APC	nonsynonymous SNV	.	.	Uncertain significance|Benign|Uncertain significance|Uncertain significance	not_provided|Hereditary_cancer-predisposing_syndrome|Familial_adenomatous_polyposis_1|not_specified	RCV000034405.1|RCV000131638.5|RCV000168324.5|RCV000211900.2	MedGen|MedGen:SNOMED_CT|MedGen:OMIM|MedGen	CN221809|C0027672:699346009|C2713442:175100|CN169374	0.0004	.	.	.	0.002	.	0.0001	0	0	0	0	0.0003	0	0	0.0005	.	0.0007	.	.	0.0002	0	2.98e-05	0	0	4.49e-05	0.0003	0	0	9.68e-05	0	0
5	112174677	rs143638171	T	C	759.4	PASS	7	326;362;805;875;1292;4107559;4124432	1,1,1,1,1,1,1	APC	nonsynonymous SNV	COSM30751	1(large_intestine)	Benign|other|Benign|Benign|Uncertain significance|Likely benign	not_provided|not_specified|Hereditary_cancer-predisposing_syndrome|Familial_adenomatous_polyposis_1|Familial_multiple_polyposis_syndrome|APC-Associated_Polyposis_Disorders	RCV000034384.1|RCV000077988.8|RCV000115083.6|RCV000196915.3|RCV000203169.1|RCV000393833.1	MedGen|MedGen|MedGen:SNOMED_CT|MedGen:OMIM|MedGen:Orphanet:SNOMED_CT|MedGen	CN221809|CN169374|C0027672:699346009|C2713442:175100|C0032580:ORPHA733:72900001|CN239210	0.001	.	0.0014	.	0.004	.	0.0016	0.0009	0.001	0	0.0003	0.0026	0.0011	0	0.0024	0.0014	0.0029	.	.	0.0019	0.0007	0.0015	0.0001	0	0.0001	0.0035	0.0018	0	0.0024	0.001	0.0024
5	112174802	rs201830995	C	T	2009.1	PASS	2	124;569	1,1	APC	nonsynonymous SNV	COSM1580515	1(stomach);1(haematopoietic_and_lymphoid_tissue)	Likely benign|Likely benign|Likely benign|Benign	not_specified|Hereditary_cancer-predisposing_syndrome|Familial_adenomatous_polyposis_1|Familial_multiple_polyposis_syndrome	RCV000120025.1|RCV000129096.5|RCV000196848.4|RCV000239305.1	MedGen|MedGen:SNOMED_CT|MedGen:OMIM|MedGen:Orphanet:SNOMED_CT	CN169374|C0027672:699346009|C2713442:175100|C0032580:ORPHA733:72900001	0.0002	.	.	.	0.001	.	0.0003	0	0.0015	0	0	0.0003	0	6.07e-05	0.0002	.	0.0002	.	.	0.0003	6.55e-05	0.0013	0	0	0	0.0003	0.0016	3.25e-05	0.0004	0.0003	0.0024
5	112175423	.	C	G	814.7	PASS	1	1103	1	APC	nonsynonymous SNV	.	.	.	.	.	.	.	.	.	.	.	.	.	.	.	.	.	.	.	.	.	.	.	.	.	.	.	.	.	.	.	.	.	.	.	.	.	.
5	112178112	rs34919187	C	T	335.1	PASS	1	155	1	APC	nonsynonymous SNV	.	.	Uncertain significance|Likely benign|other|Likely benign|Likely benign	not_provided|Hereditary_cancer-predisposing_syndrome|Familial_adenomatous_polyposis_1|not_specified|APC-Associated_Polyposis_Disorders	RCV000034396.1|RCV000115115.7|RCV000119123.9|RCV000247116.2|RCV000343531.1	MedGen|MedGen:SNOMED_CT|MedGen:OMIM|MedGen|MedGen	CN221809|C0027672:699346009|C2713442:175100|CN169374|CN239210	0.0002	.	0.0014	.	.	.	0.001	9.7e-05	0.0016	0	0	0.0014	0.0044	0.0001	0.0011	0.0002	0.0015	.	.	0.0011	6.54e-05	0.0016	0.0063	0	0	0.0012	0.0026	0.0002	0.0007	0.0001	0.0024
5	112178805	rs147549623	G	A	438.4	PASS	3	4113825;4127766;4177434	1,1,1	APC	nonsynonymous SNV	.	.	Likely benign|Benign|Likely benign	Hereditary_cancer-predisposing_syndrome|Familial_adenomatous_polyposis_1|not_specified	RCV000115121.7|RCV000119237.7|RCV000200965.4	MedGen:SNOMED_CT|MedGen:OMIM|MedGen	C0027672:699346009|C2713442:175100|CN169374	0.0004	0.0008	.	.	.	0.001	0.0008	0.0005	0	0	0	0.0012	0	0.0007	0.0012	0.0005	0.0015	.	.	0.0008	0.0006	0	0	5.8e-05	0	0.0015	0.0002	0.0008	0.0009	0.0007	0
5	123976999	.	T	A	2328.7	PASS	1	291	1	ZNF608	nonsynonymous SNV	.	.	.	.	.	.	.	.	.	.	.	.	.	.	.	.	.	.	.	.	.	.	.	.	.	.	.	.	.	.	.	.	.	.	.	.	.	.
5	123979338	.	C	A	462	PASS	1	4168738	1	ZNF608	nonsynonymous SNV	.	.	.	.	.	.	.	.	.	.	.	.	.	.	.	.	.	.	.	.	.	.	.	.	.	.	.	.	.	.	.	.	.	.	.	.	.	.
5	124079821	.	C	T	935.8	PASS	1	586	1	ZNF608	nonsynonymous SNV	.	.	.	.	.	.	.	.	.	.	.	.	.	.	.	.	.	.	.	.	.	.	.	.	.	.	.	.	.	.	.	.	.	.	.	.	.	.
5	124080379	rs139312462	T	C	1623.7	PASS	5	015;111;1187;854;861	1,1,1,1,1	ZNF608	nonsynonymous SNV	.	.	.	.	.	.	.	0.0002	.	0.0014	.	.	.	0.0006	0.0002	0.0027	0	0	0.0006	0.0011	6.06e-05	0.0007	0.0002	0.0009	.	.	0.0006	6.54e-05	0.0018	0	0	0	0.0008	0.0016	0	0.0005	0.0002	0.0012
5	131325108	.	G	C	417	PASS	1	4100049	1	ACSL6	nonsynonymous SNV	.	.	.	.	.	.	.	.	.	.	.	.	.	.	.	.	.	.	.	.	.	.	.	.	.	.	.	.	.	.	.	.	.	.	.	.	.	.
5	132270084	rs141402018	G	C	689.7	PASS	1	577	1	AFF4	nonsynonymous SNV	.	.	.	.	.	.	.	0.0002	.	.	.	0.001	.	0.0003	0	8.64e-05	0	0.0012	0.0004	0	0.0001	0.0002	.	0.0003	.	.	0.0004	6.53e-05	0.0002	0	0	0.0017	0.0003	0.0005	6.5e-05	0.0004	0.0001	0
5	132270213	.	C	T	1177.2	PASS	1	115	1	AFF4	nonsynonymous SNV	.	.	.	.	.	.	.	.	.	.	.	.	.	.	.	.	.	.	.	.	.	.	.	.	.	.	.	.	.	.	.	.	.	.	.	.	.	.
5	142283163	.	A	G	369.8	PASS	1	4161288	1	ARHGAP26	nonsynonymous SNV	.	.	.	.	.	.	.	.	.	.	.	.	.	.	.	.	.	.	.	.	.	.	.	.	.	.	.	.	.	.	.	.	.	.	.	.	.	.
5	142435633	.	A	G	214.9	PASS	1	4109142	1	ARHGAP26	nonsynonymous SNV	.	.	.	.	.	.	.	.	.	.	.	.	.	.	.	.	.	.	.	.	.	.	.	.	.	.	.	.	.	.	.	.	.	.	.	.	.	.
5	149497358	rs35731372	C	T	268.6	PASS	1	824	1	PDGFRB	nonsynonymous SNV	.	.	.	.	.	.	.	0.0004	.	.	.	.	0.002	0.0003	0.0002	0	0	0	0.0002	0	0.0015	0.0002	0.0002	0.0001	.	.	0.0003	6.55e-05	0.0002	0	0	0	0.0002	0.0002	0.0011	9.72e-05	0.0001	0
5	149500795	.	T	C	1096.7	PASS	1	814	1	PDGFRB	nonsynonymous SNV	.	.	.	.	.	.	.	.	.	.	.	.	.	.	.	.	.	.	.	.	.	.	.	.	.	.	.	.	.	.	.	.	.	.	.	.	.	.
5	149509395	rs142992960	G	A	480.1	PASS	1	330	1	PDGFRB	nonsynonymous SNV	.	.	.	.	.	.	.	0.0006	.	.	.	.	0.0031	0.0012	0.0002	0.0005	0	0.0008	0.0011	0	0.0035	0.0009	0.0002	0.0013	.	.	0.0011	0.0002	0.0004	0.0014	5.8e-05	0.0009	0.0011	0.0015	0.0031	0.0009	0.0002	0
5	158526589	.	AC	A	227.6	PASS	1	4190316	1	EBF1	splice_donor
5	159507745	.	C	G	481.2	PASS	1	1426	1	PWWP2A	nonsynonymous SNV	.	.	.	.	.	.	.	.	.	.	.	.	.	.	.	.	.	.	.	.	.	.	.	.	.	.	.	.	.	.	.	.	.	.	.	.	.	.
5	170736622	rs34255055	G	T	272.1	PASS	2	621;4111337	1,1	TLX3	nonsynonymous SNV	.	.	.	.	.	.	.	0.0008	.	.	.	0.002	0.002	0.0013	0	0.0014	0	0.0006	0.0016	0	0.0016	0.0013	.	0.002	.	.	0.0011	8.01e-05	0.0011	0.0049	0	0.0001	0.001	0.002	0.0015	0.0007	0.0002	0
5	176520411	.	C	G	376.5	PASS	1	137	1	FGFR4	nonsynonymous SNV	.	.	.	.	.	.	.	.	.	.	.	.	.	.	.	.	.	.	.	.	.	.	.	.	.	.	.	.	.	.	.	.	.	.	.	.	.	.
5	176520442	rs75935301	C	A	260.1	PASS	1	159	1	FGFR4	nonsynonymous SNV	.	.	.	.	.	.	.	0.0008	0.0015	.	.	0.002	.	0.0005	0.001	0.0022	0	0	0.0004	0.0022	0	0.0002	0.0007	.	.	.	0.0005	0.0014	0.0019	0	0	0	0.0003	0.0009	0	0.0004	0.0008	0.0036
5	176562601	rs1321096753	C	G	910.7	PASS	1	802	1	NSD1	nonsynonymous SNV	.	.	.	.	.	.	.	.	.	.	.	.	.	.	.	.	.	.	.	.	.	.	.	.	.	.	.	.	.	.	.	.	.	.	.	.	.	.
5	176700765	.	C	T	767.4	PASS	1	30	1	NSD1	nonsynonymous SNV	.	.	.	.	.	.	.	.	.	.	.	.	.	.	.	.	.	.	.	.	.	.	.	.	.	.	.	.	.	.	.	.	.	.	.	.	.	.
5	176721271	rs1486029151	G	C	1142.5	PASS	1	621	1	NSD1	nonsynonymous SNV	.	.	.	.	.	.	.	.	.	.	.	.	.	.	.	.	.	.	.	.	.	.	.	.	.	.	.	.	.	.	.	.	.	.	.	.	.	.
5	176722179	.	G	C	1013.7	PASS	1	12	1	NSD1	nonsynonymous SNV	.	.	.	.	.	.	.	.	.	.	.	.	.	.	.	.	.	.	.	.	.	.	.	.	.	.	.	.	.	.	.	.	.	.	.	.	.	.
5	180052965	rs367879842	G	A	230.3	PASS	1	393	1	FLT4	nonsynonymous SNV	.	.	.	.	.	.	.	0.0002	.	.	.	0.001	.	9.22e-05	0	0.0003	0	0	0.0001	0.0011	0	0.0001	.	0.0001	.	.	0.0001	0	0.0004	0	0	0	9.12e-05	0.0005	0	9.7e-05	0	0.0024
5	180052980	.	C	T	207.8	PASS	1	1311	1	FLT4	nonsynonymous SNV	.	.	.	.	.	.	.	.	.	.	.	.	.	.	.	.	.	.	.	.	.	.	.	.	.	.	.	.	.	.	.	.	.	.	.	.	.	.
6	18237656	.	G	A	413.8	PASS	1	27	1	DEK	nonsynonymous SNV	.	.	.	.	.	.	.	.	.	.	.	.	.	.	.	.	.	.	.	.	.	.	.	.	.	.	.	.	.	.	.	.	.	.	.	.	.	.
6	18439952	.	A	G	937.3	PASS	1	841	1	RNF144B	nonsynonymous SNV	.	.	.	.	.	.	.	.	.	.	.	.	.	.	.	.	.	.	.	.	.	.	.	.	.	.	.	.	.	.	.	.	.	.	.	.	.	.
6	18459948	.	A	G	1151.4	PASS	1	855	1	RNF144B	nonsynonymous SNV	.	.	.	.	.	.	.	.	.	.	.	.	.	.	.	.	.	.	.	.	.	.	.	.	.	.	.	.	.	.	.	.	.	.	.	.	.	.
6	26056129	rs140766420	C	A	553.9	PASS	1	44	1	HIST1H1C	nonsynonymous SNV	.	.	.	.	.	.	.	0.0012	0.0038	0.0014	.	.	.	0.0005	0.0036	0.0006	0	0	7.49e-05	0	0.0008	0.0014	0.0036	0.0002	0.011	.	0.0004	0.0037	0.0003	0	0	0	5.37e-05	0.0005	0.0008	0.0011	0.0038	0
6	26056240	rs547786942	C	G	388.2	PASS	1	477	1	HIST1H1C	nonsynonymous SNV	COSM4885402	1(upper_aerodigestive_tract)	.	.	.	.	.	0.0002	.	.	.	0.001	.	8.28e-06	0	0	0	0	1.5e-05	0	0	.	.	.	.	.	6.5e-05	0	0.0003	0	0.0002	0	1.79e-05	0	0	.	.	.
6	26156834	.	C	G	225.1	PASS	1	273	1	HIST1H1E	nonsynonymous SNV	.	.	.	.	.	.	.	.	.	.	.	.	.	.	.	.	.	.	.	.	.	.	.	.	.	.	.	.	.	.	.	.	.	.	.	.	.	.
6	26157015	rs1381465342	G	A	270.2	PASS	2	4144951;4166151	1,1	HIST1H1E	nonsynonymous SNV	.	.	.	.	.	.	.	.	.	.	.	.	.	.	.	.	.	.	.	.	.	.	.	.	.	.	.	.	.	.	.	.	.	.	.	.	.	.
6	27101191	.	C	G	908.3	PASS	1	571	1	HIST1H2AG	nonsynonymous SNV	.	.	.	.	.	.	.	.	.	.	.	.	.	.	.	.	.	.	.	.	.	.	.	.	.	.	.	.	.	.	.	.	.	.	.	.	.	.
6	27107158	.	G	A	171.1	PASS	1	54	1	HIST1H4I	nonsynonymous SNV	COSM87505	1(pancreas)	.	.	.	.	.	.	.	.	.	.	.	.	.	.	.	.	.	.	.	.	.	.	.	.	.	.	.	.	.	.	.	.	.	.	.	.
6	27835061	.	T	G	1212.2	PASS	1	447	1	HIST1H1B	nonsynonymous SNV	.	.	.	.	.	.	.	.	.	.	.	.	.	.	.	.	.	.	.	.	.	.	.	.	.	.	.	.	.	.	.	.	.	.	.	.	.	.
6	27839834	rs549064212	C	T	373.6	PASS	1	4162154	1	HIST1H3I	nonsynonymous SNV	.	.	.	.	.	.	.	0.0002	.	.	0.001	.	.	8.24e-06	0	0	0.0001	0	0	0	0	.	.	.	.	.	8.12e-06	0	0	0	5.8e-05	0	0	0	3.25e-05	3.23e-05	0	0
6	27839996	.	G	C	44.9	PASS	1	4135350	1	HIST1H3I	nonsynonymous SNV	.	.	.	.	.	.	.	.	.	.	.	.	.	.	.	.	.	.	.	.	.	.	.	.	.	.	.	.	.	.	.	.	.	.	.	.	.	.
6	27858417	.	T	C	399.5	PASS	1	1266	1	HIST1H3J	nonsynonymous SNV	.	.	.	.	.	.	.	.	.	.	.	.	.	.	.	.	.	.	.	.	.	.	.	.	.	.	.	.	.	.	.	.	.	.	.	.	.	.
6	28872280	rs141241395	C	T	477.2	PASS	1	811	1	TRIM27	nonsynonymous SNV	.	.	.	.	.	.	.	0.0006	.	0.0014	.	0.002	.	0.0002	0.0001	0	0	0	0.0004	0	6.15e-05	0.0004	.	0.0006	.	.	0.0003	7.04e-05	0.0004	0	0	0	0.0004	0.0004	0	0.0001	0	0
6	28876852	rs761203448	T	C	195.8	PASS	1	150	1	TRIM27	nonsynonymous SNV	.	.	.	.	.	.	.	.	.	.	.	.	.	.	.	.	.	.	.	.	.	.	.	.	.	.	.	.	.	.	.	.	.	.	.	.	.	.
6	31133820	rs1489249310	T	C	238.3	PASS	1	785	1	POU5F1	nonsynonymous SNV	.	.	.	.	.	.	.	.	.	.	.	.	.	.	.	.	.	.	.	.	.	.	.	.	.	.	.	.	.	.	.	.	.	.	.	.	.	.
6	37138956	.	G	A	59.7	PASS	1	4159421	1	PIM1	nonsynonymous SNV	COSM4610153	1(haematopoietic_and_lymphoid_tissue)	.	.	.	.	.	.	.	.	.	.	.	.	.	.	.	.	.	.	.	.	.	.	.	.	.	.	.	.	.	.	.	.	.	.	.	.
6	37139030	rs35760989	G	C	1048	PASS	5	051;756;4102009;4121974;4148261	1,1,1,1,1	PIM1	nonsynonymous SNV	COSM5020785	1(soft_tissue)	.	.	.	.	.	0.0006	.	.	.	0.003	.	0.002	0.0005	0.0003	0	0.0013	0.0033	0.0011	0	0.0022	0.0007	0.0029	.	.	0.0017	0.0005	0.0002	0	0	0.0011	0.0034	0.0006	0	0.0019	0.0007	0.0012
6	37139094	.	G	T	247.7	PASS	1	1311	1	PIM1	nonsynonymous SNV	.	.	.	.	.	.	.	.	.	.	.	.	.	.	.	.	.	.	.	.	.	.	.	.	.	.	.	.	.	.	.	.	.	.	.	.	.	.
6	37139098	.	C	A	81.4	PASS	1	4159421	1	PIM1	nonsynonymous SNV	.	.	.	.	.	.	.	.	.	.	.	.	.	.	.	.	.	.	.	.	.	.	.	.	.	.	.	.	.	.	.	.	.	.	.	.	.	.
6	41652493	rs201604256	G	T	317.8	PASS	1	179	1	TFEB	nonsynonymous SNV	.	.	.	.	.	.	.	0.0004	.	.	.	0.002	.	0.0004	0	0.0002	0	0.0012	0.0004	0.0023	0.0004	0.0002	.	0.0003	.	.	0.0005	0	0.0003	0.0038	0	0.0013	0.0002	0.0013	0.0004	0.0002	0.0001	0
6	41908701	.	G	C	215.9	PASS	1	841	1	CCND3	nonsynonymous SNV	.	.	.	.	.	.	.	.	.	.	.	.	.	.	.	.	.	.	.	.	.	.	.	.	.	.	.	.	.	.	.	.	.	.	.	.	.	.
6	43550796	rs1360464485	T	C	308.3	PASS	1	4144951	1	POLH	nonsynonymous SNV	.	.	.	.	.	.	.	.	.	.	.	.	.	.	.	.	.	.	.	.	.	.	.	.	.	.	.	.	.	.	.	.	.	.	.	.	.	.
6	43571679	rs147712217	T	C	311.9	PASS	1	4110498	1	POLH	nonsynonymous SNV	.	.	.	.	.	.	.	0.0008	.	.	.	.	0.0041	0.0011	9.61e-05	0.0003	0.0001	0.0002	0.0009	0.0011	0.0041	0.0005	0.0005	0.0006	.	.	0.0011	0.0001	0.0002	0.0001	0.0001	8.97e-05	0.0011	0.0005	0.0045	0.0005	0.0005	0.0012
6	43581878	.	CCT	C	3332.2	PASS	2	070;504	1,1	POLH	frameshift deletion
6	87953322	rs184839913	T	G	261	PASS	2	312;4135813	1,1	ZNF292	nonsynonymous SNV	.	.	.	.	.	.	.	0.0002	.	.	.	0.001	.	0.0008	0.0015	0	0	0	0.0014	0	0.0001	0.001	0.0008	0.0011	.	.	0.001	0.0009	0.0004	0	0	0.0002	0.0019	0.0004	6.7e-05	0.0008	0.0005	0.0012
6	87964726	.	T	C	691.5	PASS	1	1188	1	ZNF292	nonsynonymous SNV	.	.	.	.	.	.	.	.	.	.	.	.	.	.	.	.	.	.	.	.	.	.	.	.	.	.	.	.	.	.	.	.	.	.	.	.	.	.
6	87965046	.	G	A	647	PASS	1	4176584	1	ZNF292	nonsynonymous SNV	.	.	.	.	.	.	.	.	.	.	.	.	.	.	.	.	.	.	.	.	.	.	.	.	.	.	.	.	.	.	.	.	.	.	.	.	.	.
6	87965776	.	A	G	329.2	PASS	1	1566	1	ZNF292	nonsynonymous SNV	.	.	.	.	.	.	.	.	.	.	.	.	.	.	.	.	.	.	.	.	.	.	.	.	.	.	.	.	.	.	.	.	.	.	.	.	.	.
6	87965943	.	GAGAA	G	176.5	PASS	1	25	1	ZNF292	frameshift deletion
6	87966169	.	T	C	485.8	PASS	1	176	1	ZNF292	nonsynonymous SNV	.	.	.	.	.	.	.	.	.	.	.	.	.	.	.	.	.	.	.	.	.	.	.	.	.	.	.	.	.	.	.	.	.	.	.	.	.	.
6	87966641	.	C	G	1069.3	PASS	1	1291	1	ZNF292	nonsynonymous SNV	.	.	.	.	.	.	.	.	.	.	.	.	.	.	.	.	.	.	.	.	.	.	.	.	.	.	.	.	.	.	.	.	.	.	.	.	.	.
6	87967393	rs572597069	G	A	1029.9	PASS	1	376	1	ZNF292	nonsynonymous SNV	COSM1233829;COSM1233828	1(large_intestine)	.	.	.	.	.	0.0002	.	.	.	0.001	.	9.99e-06	0	0	0	0	1.8e-05	0	0	.	.	.	.	.	8.32e-06	0	0	0	0	0	1.85e-05	0	0	.	.	.
6	87968677	rs41273279	C	T	1149.3	PASS	3	1195;509;306	1,1,1	ZNF292	nonsynonymous SNV	.	.	.	.	.	.	.	0.001	0.0008	0.0014	.	0.003	.	0.0006	0	0.0004	0	0	0.001	0	6.5e-05	0.0003	.	0.0005	.	.	0.0006	6.59e-05	0.0008	0.0006	0	4.5e-05	0.0009	0.0009	3.26e-05	0.0003	0	0
6	87969118	rs1191785376	G	A	510.9	PASS	1	4176133	1	ZNF292	nonsynonymous SNV	.	.	.	.	.	.	.	.	.	.	.	.	.	.	.	.	.	.	.	.	.	.	.	.	.	.	0	0	0	0	0	0	0	0	0	.	.	.
6	90642474	.	G	A	423.4	PASS	1	689	1	BACH2	nonsynonymous SNV	.	.	.	.	.	.	.	.	.	.	.	.	.	.	.	.	.	.	.	.	.	.	.	.	.	.	.	.	.	.	.	.	.	.	.	.	.	.
6	90660424	.	C	A	373.4	PASS	1	669	1	BACH2	nonsynonymous SNV	.	.	.	.	.	.	.	.	.	.	.	.	.	.	.	.	.	.	.	.	.	.	.	.	.	.	.	.	.	.	.	.	.	.	.	.	.	.
6	90660581	rs149898769	C	T	434.4	PASS	4	733;4111326;4119702;4182393	1,1,1,1	BACH2	nonsynonymous SNV	.	.	.	.	.	.	.	0.001	.	0.0029	.	0.003	.	0.0027	0.0001	0.0008	0	0.0015	0.0045	0.0035	6.88e-05	0.0024	0.0007	0.0033	.	0.033	0.0025	0.0002	0.0016	0.0003	0	0.0019	0.0044	0.0026	0.0001	0.0023	0.0005	0.0024
6	93955064	rs151105732	G	A	695.2	PASS	1	442	1	EPHA7	nonsynonymous SNV	COSM5431599;COSM5431600	1(oesophagus)	.	.	.	.	.	0.0014	0.0045	0.0014	.	.	.	0.0006	0.0038	0.0005	0	0	0.0004	0.0011	0.0001	0.0017	0.0036	0.0007	.	.	0.0006	0.0043	0.0006	0	5.81e-05	0	0.0005	0.0007	0.0001	0.0014	0.0041	0.0024
6	93965644	.	G	C	784.5	PASS	1	53	1	EPHA7	nonsynonymous SNV	.	.	.	.	.	.	.	.	.	.	.	.	.	.	.	.	.	.	.	.	.	.	.	.	.	.	.	.	.	.	.	.	.	.	.	.	.	.
6	93967903	rs146203229	T	G	481.4	PASS	1	4173863	1	EPHA7	nonsynonymous SNV	.	.	.	.	.	.	.	0.0002	.	.	.	0.001	.	0.0007	0.0003	0.0003	0	0.0002	0.0011	0	0	0.0009	0.0002	0.0013	.	.	0.0008	0.0002	0.0005	0.0046	0	4.49e-05	0.0011	0.0002	0	0.0005	0.0003	0
6	106543549	rs139534654	A	G	599.9	PASS	2	4112817;4147968	1,1	PRDM1	nonsynonymous SNV	.	.	.	.	.	.	.	0.0002	.	0.0014	.	.	.	0.0008	0.0002	0.0003	0	0.0002	0.0013	0.0011	0	0.0009	0.0005	0.0012	.	0.016	0.0008	0.0003	0.0007	0	0	0.0003	0.0014	0.0004	0	0.0008	0.0006	0.0024
6	106547240	rs374709917	G	C	643.5	PASS	1	4130003	1	PRDM1	nonsynonymous SNV	.	.	.	.	.	.	.	.	.	.	.	.	.	.	.	.	.	.	.	.	.	0.0001	.	0.0001	.	.	.	.	.	.	.	.	.	.	.	.	.	.
6	106554879	.	G	A	310.5	PASS	1	1418	1	PRDM1	nonsynonymous SNV	.	.	.	.	.	.	.	.	.	.	.	.	.	.	.	.	.	.	.	.	.	.	.	.	.	.	.	.	.	.	.	.	.	.	.	.	.	.
6	117609822	.	C	G	498.7	PASS	1	4111337	1	ROS1	nonsynonymous SNV	.	.	.	.	.	.	.	.	.	.	.	.	.	.	.	.	.	.	.	.	.	.	.	.	.	.	.	.	.	.	.	.	.	.	.	.	.	.
6	117622137	rs142264513	C	T	437.3	PASS	1	1056	1	ROS1	nonsynonymous SNV	.	.	.	.	.	.	.	0.0006	.	0.0029	.	0.001	.	0.0008	9.65e-05	0.0006	0	0.0005	0.001	0.0023	0.001	0.0006	.	0.0009	.	.	0.0007	0.0002	0.0005	0	0	0.0002	0.0011	0.0012	0.0009	0.0004	0.0001	0.0012
6	117631302	rs138376257	G	A	425.1	PASS	1	4159170	1	ROS1	nonsynonymous SNV	COSM227020;COSM227019;COSM5595249	3(skin)	.	.	.	.	.	0.0002	.	.	.	0.001	.	0.0002	9.63e-05	0.0003	0	0	0.0003	0	6.06e-05	0.0002	.	0.0002	.	.	0.0002	6.54e-05	0.0002	0	0	4.49e-05	0.0002	0	3.25e-05	6.47e-05	0	0.0012
6	117674302	.	T	G	697.9	PASS	1	277	1	ROS1	nonsynonymous SNV	.	.	.	.	.	.	.	.	.	.	.	.	.	.	.	.	.	.	.	.	.	.	.	.	.	.	.	.	.	.	.	.	.	.	.	.	.	.
6	117686261	rs149513638	C	T	873.6	PASS	4	083;273;663;676	1,1,1,1	ROS1	nonsynonymous SNV	.	.	.	.	.	.	.	0.0006	.	.	.	.	0.0031	0.0008	9.62e-05	0.001	0	0	0.0005	0	0.0027	0.0005	0.0002	0.0006	.	.	0.0008	0.0001	0.0011	0.0012	0	4.49e-05	0.0004	0.0005	0.003	0.0002	0	0
6	117686297	rs1302519741	TTAAATAAGGCA	T	75	PASS	1	1271	1	ROS1	stopgain
6	117706887	.	A	C	1570.2	PASS	1	1223	1	ROS1	nonsynonymous SNV	.	.	.	.	.	.	.	.	.	.	.	.	.	.	.	.	.	.	.	.	.	.	.	.	.	.	.	.	.	.	.	.	.	.	.	.	.	.
6	117715381	rs56274823	A	G	1605.9	PASS	6	1471;326;341;350;760;788	1,1,1,1,1,1	ROS1	nonsynonymous SNV	COSM3697472;COSM3697473	1(large_intestine)	.	.	.	.	.	0.001	.	0.0014	.	0.004	.	0.0017	0.0007	0.0008	0	0.0008	0.0026	0.0011	0.0004	0.0028	0.0007	0.0038	0.011	.	0.0017	0.0006	0.001	0.0018	0	0.0003	0.0029	0.0013	0.0006	0.0021	0.0003	0
6	127471694	.	A	G	442.2	PASS	1	4186613	1	RSPO3	nonsynonymous SNV	.	.	.	.	.	.	.	.	.	.	.	.	.	.	.	.	.	.	.	.	.	.	.	.	.	.	.	.	.	.	.	.	.	.	.	.	.	.
6	128297846	.	A	G	261.7	PASS	1	1307	1	PTPRK	nonsynonymous SNV	.	.	.	.	.	.	.	.	.	.	.	.	.	.	.	.	.	.	.	.	.	.	.	.	.	.	.	.	.	.	.	.	.	.	.	.	.	.
6	128303989	rs144386522	T	A	718.8	PASS	1	474	1	PTPRK	nonsynonymous SNV	.	.	.	.	.	.	.	0.0006	.	.	.	.	0.0031	0.0004	0	8.65e-05	0	0	9.02e-05	0	0.0027	0.0002	.	0.0003	.	.	0.0004	0	6.11e-05	0	0	0	8.14e-05	0.0004	0.0026	6.46e-05	0	0
6	128313848	.	G	T	291	PASS	1	4140531	1	PTPRK	nonsynonymous SNV	.	.	.	.	.	.	.	.	.	.	.	.	.	.	.	.	.	.	.	.	.	.	.	.	.	.	.	.	.	.	.	.	.	.	.	.	.	.
6	128718818	rs199678395	T	C	1115.7	PASS	2	1587;4182393	1,1	PTPRK	startloss	.	.	.	.	.	.	.	0.0004	.	0.0014	.	0.001	.	0.0003	0.0002	0.0002	0	0	0.0004	0.0011	0	0.0002	.	0.0003	.	.	0.0003	0.0001	0.0001	0	0	4.48e-05	0.0005	0.0005	0	0.0003	0.0003	0
6	136590612	.	T	C	408	PASS	2	4103570;4125240	1,1	BCLAF1	nonsynonymous SNV	.	.	.	.	.	.	.	.	.	.	.	.	.	.	.	.	.	.	.	.	.	.	.	.	.	.	.	.	.	.	.	.	.	.	.	.	.	.
6	136597579	.	T	C	421.2	PASS	1	4146301	1	BCLAF1	nonsynonymous SNV	.	.	.	.	.	.	.	.	.	.	.	.	.	.	.	.	.	.	.	.	.	.	.	.	.	.	.	.	.	.	.	.	.	.	.	.	.	.
6	136599533	rs1347270658	C	G	356.6	PASS	1	4107990	1	BCLAF1	nonsynonymous SNV	.	.	.	.	.	.	.	.	.	.	.	.	.	.	.	.	.	.	.	.	.	.	.	.	.	.	.	.	.	.	.	.	.	.	.	.	.	.
6	138202173	rs201429571	G	A	1629.8	PASS	1	57	1	TNFAIP3	nonsynonymous SNV	.	.	.	.	.	.	.	0.0004	.	0.0014	.	0.001	.	0.0003	0	0.0008	0	0	0.0003	0.0012	0.0002	0.0002	.	0.0002	.	.	0.0003	0	0.001	0.0005	0	0	0.0003	0.0014	0.0001	0.0002	0.0001	0.0012
6	139164200	rs184795504	C	T	431.3	PASS	2	192;4193638	1,1	ECT2L	nonsynonymous SNV	.	.	.	.	.	.	.	0.0002	.	.	.	0.001	.	0.0007	0.0002	0.0003	0	0.0021	0.001	0.0011	0	0.0008	0.0003	0.0011	.	.	0.0009	0.0003	0.0003	0	0	0.0027	0.0013	0.0002	9.75e-05	0.0009	0	0
6	139164278	rs1286271280	G	A	474.8	PASS	1	4128435	1	ECT2L	nonsynonymous SNV	.	.	.	.	.	.	.	.	.	.	.	.	.	.	.	.	.	.	.	.	.	.	.	.	.	.	.	.	.	.	.	.	.	.	.	.	.	.
6	139175261	rs372903555	G	A	2058.4	PASS	1	41	1	ECT2L	nonsynonymous SNV	.	.	.	.	.	.	.	0.0002	.	.	.	.	0.001	6.64e-05	0.0001	0	0	0	6e-05	0	0.0002	0.0001	.	0.0001	.	.	5.28e-05	6.54e-05	5.96e-05	0	0	0	5.38e-05	0	0.0001	.	.	.
6	139206647	.	G	A	486.4	PASS	1	325	1	ECT2L	nonsynonymous SNV	.	.	.	.	.	.	.	.	.	.	.	.	.	.	.	.	.	.	.	.	.	.	.	.	.	.	.	.	.	.	.	.	.	.	.	.	.	.
6	139206872	rs79865247	G	A	383	PASS	1	4189035	1	ECT2L	nonsynonymous SNV	.	.	.	.	.	.	.	0.0006	.	.	.	0.003	.	0.0019	0.0003	0.0004	0.0029	0.0021	0.0026	0.0011	0	0.0019	0.0002	0.0026	.	.	0.0018	0.0003	0.0005	0.001	0.0026	0.0027	0.0028	0.0013	0	0.003	0.0003	0
6	139206888	rs199701983	C	T	442.6	PASS	1	4123945	1	ECT2L	nonsynonymous SNV	.	.	not provided	not_specified	RCV000120667.1	MedGen	CN169374	0.0006	.	.	.	0.003	.	0.0012	0.0001	0	0	0.0044	0.0017	0.0011	0	0.0008	.	0.0012	.	.	0.0009	6.54e-05	0	0	0	0.0027	0.0014	0.0007	0	0.0024	0	0
6	139222224	rs200833857	C	T	999.1	PASS	1	296	1	ECT2L	nonsynonymous SNV	.	.	.	.	.	.	.	0.0002	.	0.0014	.	.	.	0.0004	0	0.002	0	0	0.0004	0	0	0.0003	.	0.0004	.	.	0.0003	0	0.001	0	0	0	0.0004	0.0015	0	0.0002	0	0.0024
6	139223664	rs374898524	G	A	384.6	PASS	1	4135278	1	ECT2L	nonsynonymous SNV	.	.	not provided	not_specified	RCV000120673.1	MedGen	CN169374	0.0004	.	.	.	.	0.002	0.0002	0	0	0	0	6e-05	0	0.001	0.0001	.	0.0001	.	.	0.0002	0	0	0	0	0	5.38e-05	0.0004	0.001	3.23e-05	0	0
6	150005117	rs56348064	G	A	1044.8	PASS	1	1317	1	LATS1	nonsynonymous SNV	.	.	.	.	.	.	.	0.0006	.	0.0014	.	0.002	.	0.0007	0.0003	0.0006	0	0	0.001	0	0.0002	0.0008	0.0005	0.0009	.	.	0.0007	0.0004	0.0006	0	0	4.49e-05	0.0012	0.0009	0.0002	0.0005	0.0003	0.0012
6	152163757	rs149308960	G	T	421.6	PASS	2	4138527;4174742	1,1	ESR1	nonsynonymous SNV	.	.	.	.	.	.	.	0.0006	.	0.0014	.	0.002	.	0.0019	0.0006	0.0003	0	0.0043	0.0028	0.0011	0	0.002	0.0007	0.0027	.	.	0.0015	0.0005	0.0002	0	0	0.0044	0.0023	0.0009	0	0.0016	0.0003	0
6	152265352	rs142712646	C	T	1270.8	PASS	4	117;842;4177175;4182605	1,1,1,1	ESR1	nonsynonymous SNV	COSM4969495;COSM4969496	2(central_nervous_system)	.	.	.	.	.	0.0008	.	.	.	0.003	0.001	0.001	9.79e-05	0.0002	0	0.0012	0.0015	0.0022	0.0003	0.002	0.0002	0.0029	.	.	0.0009	6.55e-05	0.0005	0.0009	5.8e-05	0.0004	0.0015	0.0005	0.0004	0.0006	0.0003	0
6	152265443	rs77797873	A	G	357.6	PASS	2	1297;4100314	1,1	ESR1	nonsynonymous SNV	.	.	.	.	.	.	.	0.0004	.	.	.	0.001	0.001	0.001	0.0004	0.0005	0.0001	0.0002	0.0014	0.0011	0.0007	0.0015	0.0007	0.002	.	.	0.0009	0.0003	0.0005	0	5.8e-05	0.0001	0.0017	0.0005	0.0005	0.0006	0.0002	0.0012
6	152454457	.	T	G	2231.3	PASS	1	393	1	SYNE1	nonsynonymous SNV	.	.	.	.	.	.	.	.	.	.	.	.	.	.	.	.	.	.	.	.	.	.	.	.	.	.	.	.	.	.	.	.	.	.	.	.	.	.
6	152454556	rs139834542	A	G	564.6	PASS	3	294;4107137;4190316	1,1,1	SYNE1	nonsynonymous SNV	COSM6049997;COSM6049993;COSM6049996;COSM6049994;COSM6049995	1(large_intestine)	Likely benign|Likely benign|other	Emery-Dreifuss_muscular_dystrophy|Cerebellar_ataxia|not_specified	RCV000304397.1|RCV000363295.1|RCV000364185.2	MedGen	CN169374	0.0006	.	0.0014	.	0.002	.	0.0012	0.0006	0.0003	0	0.0003	0.002	0	0.0001	0.0017	.	0.0026	.	0.0082	0.0013	0.0007	0.0007	0.0002	0	0.0002	0.0024	0.0005	9.75e-05	0.0016	0.0006	0
6	152461162	rs119103248	C	T	856.2	PASS	2	365;467	1,1	SYNE1	nonsynonymous SNV	.	.	Pathogenic|Uncertain significance|Likely benign|Likely benign	Emery-Dreifuss_muscular_dystrophy_4\x2c_autosomal_dominant|not_specified|Cerebellar_ataxia|Emery-Dreifuss_muscular_dystrophy	RCV000002424.2|RCV000174817.2|RCV000329983.1|RCV000389137.1	MedGen:Orphanet:SNOMED_CT	C0410189:ORPHA261:111508004	0.0008	0.0008	0.0014	.	0.002	.	0.0006	0.0003	0.0016	0	0	0.0007	0	0	0.0012	0.0011	0.0013	.	.	0.0007	0.0005	0.0016	0.0003	0	0	0.0008	0.0013	3.25e-05	0.0005	0.0005	0.0012
6	152527476	rs200236760	G	A	555.3	PASS	1	4138527	1	SYNE1	nonsynonymous SNV	COSM1441296;COSM1441297;COSM3410671;COSM3410672;COSM1441295	1(central_nervous_system)	.	.	.	.	.	0.0002	.	0.0014	.	.	.	2.48e-05	0.0002	8.67e-05	0	0	0	0	0	0.0001	0.0002	.	.	.	1.22e-05	0.0001	0	0	0	0	0	0.0002	0	.	.	.
6	152536125	.	G	T	435.4	PASS	1	4120193	1	SYNE1	nonsynonymous SNV	.	.	.	.	.	.	.	.	.	.	.	.	.	.	.	.	.	.	.	.	.	.	.	.	.	.	.	.	.	.	.	.	.	.	.	.	.	.
6	152542654	rs565754195	T	C	1022.3	PASS	1	324	1	SYNE1	nonsynonymous SNV	.	.	.	.	.	.	.	0.0002	.	.	.	0.001	.	8.24e-06	0	0	0	0	1.5e-05	0	0	.	.	.	.	.	4.07e-06	0	0	0	0	0	8.97e-06	0	0	.	.	.
6	152545711	rs140962690	A	G	953.6	PASS	1	116	1	SYNE1	nonsynonymous SNV	.	.	Likely benign|Uncertain significance|Likely benign	Emery-Dreifuss_muscular_dystrophy|not_specified|Cerebellar_ataxia	RCV000309798.1|RCV000326032.1|RCV000395237.1	.	.	0.0002	.	0.0014	.	.	.	9.07e-05	0	8.64e-05	0	0	0.0001	0	0	0.0005	.	0.0007	.	.	0.0001	0	0	0	0	0	0.0002	0	0	9.69e-05	0	0
6	152615118	rs147998933	A	G	643.2	PASS	2	141;4121621	1,1	SYNE1	nonsynonymous SNV	.	.	Uncertain significance|Likely benign|Likely benign\x2cUncertain significance	not_specified|Cerebellar_ataxia|Emery-Dreifuss_muscular_dystrophy\x2cnot_specified	RCV000180748.2|RCV000261210.1|RCV000297752.1\x2cRCV000408419.1	MedGen:Orphanet:SNOMED_CT\x2cMedGen	C0410189:ORPHA261:111508004\x2cCN169374	0.0002	.	.	.	0.001	.	0.0007	0.0006	0	0	0.0002	0.0013	0	0	0.0011	0.0002	0.0015	.	.	0.0007	0.0005	0.0001	0	0	4.48e-05	0.0015	0.0007	0	0.0008	0.0003	0
6	152651266	.	C	T	994.9	PASS	1	1050	1	SYNE1	nonsynonymous SNV	.	.	.	.	.	.	.	.	.	.	.	.	.	.	.	.	.	.	.	.	.	.	.	.	.	.	.	.	.	.	.	.	.	.	.	.	.	.
6	152651557	rs41301343	G	A	1106.9	PASS	3	475;4144951;4176325	1,1,1	SYNE1	nonsynonymous SNV	.	.	Uncertain significance|Likely benign|Likely benign	not_specified|Cerebellar_ataxia|Emery-Dreifuss_muscular_dystrophy	RCV000180075.2|RCV000282267.1|RCV000316351.1	MedGen:Orphanet:SNOMED_CT	C0410189:ORPHA261:111508004	0.0004	.	0.0014	.	0.001	.	0.001	0.0004	0.0002	0	0.0008	0.0017	0	0	0.0014	0.0005	0.0019	.	.	0.0009	0.0004	0.0001	0.0003	5.8e-05	0.0008	0.0017	0.0005	0	0.0009	0	0
6	152651911	rs142388112	C	T	909.1	PASS	1	599	1	SYNE1	nonsynonymous SNV	.	.	Likely benign|Uncertain significance|Likely benign	Cerebellar_ataxia|not_specified|Emery-Dreifuss_muscular_dystrophy	RCV000260305.1|RCV000263822.1|RCV000357277.1	MedGen|MedGen:Orphanet:SNOMED_CT	CN169374|C0410189:ORPHA261:111508004	0.001	.	0.0029	.	0.003	.	0.0009	9.64e-05	0.0003	0.0005	0.0002	0.0016	0	0	0.0008	.	0.0012	.	0.0082	0.0008	0.0003	0.0003	0	0.0003	9.08e-05	0.0015	0.0004	6.5e-05	0.0008	0.0005	0.0012
6	152665286	.	A	G	435.8	PASS	1	4197155	1	SYNE1	nonsynonymous SNV	.	.	.	.	.	.	.	.	.	.	.	.	.	.	.	.	.	.	.	.	.	.	.	.	.	.	.	.	.	.	.	.	.	.	.	.	.	.
6	152671401	rs577279875	C	T	281.4	PASS	1	1427	1	SYNE1	nonsynonymous SNV	.	.	.	.	.	.	.	0.0002	0.0008	.	.	.	.	8.24e-06	9.61e-05	0	0	0	0	0	0	.	.	.	.	.	8.12e-06	6.53e-05	2.98e-05	0	0	0	0	0	0	.	.	.
6	152690199	rs149901087	G	C	163.7	PASS	1	135	1	SYNE1	nonsynonymous SNV	.	.	Likely benign|Uncertain significance|Likely benign	Cerebellar_ataxia|not_specified|Emery-Dreifuss_muscular_dystrophy	RCV000312113.1|RCV000370965.1|RCV000391866.1	MedGen|MedGen:Orphanet:SNOMED_CT	CN169374|C0410189:ORPHA261:111508004	0.0002	.	.	.	0.001	.	0.0006	0	0.001	0	0	0.001	0	0	0.0007	.	0.001	.	.	0.0007	0	0.0012	0.0062	0	0	0.0006	0.0007	0	0.0002	0.0001	0.0012
6	152697692	rs117360770	G	C	538.1	PASS	2	1198;4178655	1,1	SYNE1	nonsynonymous SNV	.	.	Likely benign|Likely benign|Likely benign	not_specified|Cerebellar_ataxia|Emery-Dreifuss_muscular_dystrophy	RCV000179213.3|RCV000349953.1|RCV000388054.1	MedGen:Orphanet:SNOMED_CT	C0410189:ORPHA261:111508004	0.0012	.	0.0043	.	0.002	0.001	0.0015	0.0007	0.0004	0	0.0005	0.0023	0	0.0007	0.0023	0.0007	0.0031	.	.	0.0016	0.0009	0.0007	0	0	0.0002	0.003	0.0009	0.0008	0.0015	0.0007	0.0012
6	152720802	.	A	C	584.4	PASS	1	4178345	1	SYNE1	nonsynonymous SNV	.	.	.	.	.	.	.	.	.	.	.	.	.	.	.	.	.	.	.	.	.	.	.	.	.	.	.	.	.	.	.	.	.	.	.	.	.	.
6	152730821	rs577979265	A	G	1431	PASS	1	1459	1	SYNE1	nonsynonymous SNV	.	.	Likely benign|Likely benign|Uncertain significance	Emery-Dreifuss_muscular_dystrophy|Cerebellar_ataxia|not_specified	RCV000297663.1|RCV000343170.1|RCV000379763.1	MedGen	CN169374	0.0002	0.0008	.	.	.	.	7.44e-05	0	0.0002	0	0	9.02e-05	0	6.07e-05	.	.	.	.	.	7.32e-05	0	0.0001	0	0	0	8.08e-05	0.0004	6.5e-05	9.68e-05	0	0.0012
6	152751666	.	A	G	2063.1	PASS	1	884	1	SYNE1	nonsynonymous SNV	.	.	.	.	.	.	.	.	.	.	.	.	.	.	.	.	.	.	.	.	.	.	.	.	.	.	.	.	.	.	.	.	.	.	.	.	.	.
6	152762383	rs144566713	C	T	323.3	PASS	2	1075;367	1,1	SYNE1	nonsynonymous SNV	.	.	Likely benign|Likely benign|Uncertain significance	Emery-Dreifuss_muscular_dystrophy|Cerebellar_ataxia|not_specified	RCV000268310.1|RCV000320984.1|RCV000336103.1	MedGen	CN169374	0.0004	.	0.0014	.	0.001	.	0.0011	0.0005	0.0005	0	0	0.0018	0.0014	7.39e-05	0.0007	.	0.001	.	.	0.0009	0.0002	0.0005	0.0122	0	0	0.0006	0.0007	6.65e-05	0.0005	0	0
6	152768682	rs201743223	C	A	318.7	PASS	1	4166706	1	SYNE1	nonsynonymous SNV	.	.	.	.	.	.	.	0.0002	.	.	0.001	.	.	8.24e-06	0	0	0.0001	0	0	0	0	.	.	.	.	.	4.06e-06	0	0	0	5.8e-05	0	0	0	0	.	.	.
6	152774686	rs547705798	AG	A	674.3	PASS	3	1198;4119027;4178655	1,1,1	SYNE1	frameshift deletion
6	152783904	.	A	G	1302.5	PASS	1	1437	2	SYNE1	nonsynonymous SNV	.	.	.	.	.	.	.	.	.	.	.	.	.	.	.	.	.	.	.	.	.	.	.	.	.	.	.	.	.	.	.	.	.	.	.	.	.	.
6	152949429	.	T	C	540.6	PASS	1	11	1	SYNE1	nonsynonymous SNV	.	.	.	.	.	.	.	.	.	.	.	.	.	.	.	.	.	.	.	.	.	.	.	.	.	.	.	.	.	.	.	.	.	.	.	.	.	.
6	157099526	rs1378351788	G	A	226.9	PASS	1	147	1	ARID1B	nonsynonymous SNV	.	.	.	.	.	.	.	.	.	.	.	.	.	.	.	.	.	.	.	.	.	.	.	.	.	.	0	0	0	0	0	0	0	0	0	0	0	0
6	157099528	rs200808642	G	T	226.9	PASS	1	147	1	ARID1B	nonsynonymous SNV	.	.	.	.	.	.	.	.	.	.	.	.	.	.	.	.	.	.	.	.	.	.	.	.	.	.	.	.	.	.	.	.	.	.	.	0	0	0
6	157150491	.	A	G	827.7	PASS	1	338	1	ARID1B	nonsynonymous SNV	.	.	.	.	.	.	.	.	.	.	.	.	.	.	.	.	.	.	.	.	.	.	.	.	.	.	.	.	.	.	.	.	.	.	.	.	.	.
6	157405848	.	G	C	755.9	PASS	1	382	1	ARID1B	nonsynonymous SNV	.	.	.	.	.	.	.	.	.	.	.	.	.	.	.	.	.	.	.	.	.	.	.	.	.	.	.	.	.	.	.	.	.	.	.	.	.	.
6	157511242	rs138784762	A	G	1596	PASS	1	754	1	ARID1B	nonsynonymous SNV	.	.	.	.	.	.	.	0.0002	.	.	.	0.001	.	4.12e-05	0	0.0003	0	0	3e-05	0	0	0.0001	.	0.0001	.	.	7.31e-05	0	0.0004	0	0	0	5.37e-05	0	0	6.46e-05	0	0
6	159191861	rs374945393	C	T	1120.2	PASS	1	1307	1	EZR	nonsynonymous SNV	COSM4885375	1(upper_aerodigestive_tract)	.	.	.	.	.	0.0004	.	.	.	0.002	.	2.47e-05	0	8.64e-05	0	0	3e-05	0	0	.	.	.	.	.	2.84e-05	0	0.0001	0	0	0	1.79e-05	0.0002	0	.	.	.
6	167417243	.	CTTCAGTTTTT	C	558.6	PASS	1	596	1	FGFR1OP	frameshift deletion
6	167424317	.	C	T	269.3	PASS	1	561	1	FGFR1OP	nonsynonymous SNV	.	.	.	.	.	.	.	.	.	.	.	.	.	.	.	.	.	.	.	.	.	.	.	.	.	.	.	.	.	.	.	.	.	.	.	.	.	.
7	2954916	.	G	C	148.5	PASS	1	135	1	CARD11	nonsynonymous SNV	.	.	.	.	.	.	.	.	.	.	.	.	.	.	.	.	.	.	.	.	.	.	.	.	.	.	.	.	.	.	.	.	.	.	.	.	.	.
7	6031639	rs139438201	T	C	232	PASS	1	770	1	PMS2	nonsynonymous SNV	.	.	Benign|Likely benign|Benign|other	not_provided|Hereditary_cancer-predisposing_syndrome|Lynch_syndrome|not_specified	RCV000034638.1|RCV000115712.5|RCV000168052.5|RCV000212860.2	MedGen|MedGen:SNOMED_CT|MedGen:Orphanet:SNOMED_CT|MedGen	CN221809|C0027672:699346009|C1333990:ORPHA144:315058005|CN169374	0.0002	.	.	.	0.001	.	0.0004	0	0.0005	0	0	0.0004	0.0034	0.0003	0.0004	.	0.0006	.	.	0.0004	0	0.0002	0.007	0	0	8.06e-05	0.0011	0.0005	6.46e-05	0.0001	0
7	6038824	rs374704824	C	T	668.5	PASS	1	4131213	1	PMS2	nonsynonymous SNV	COSM3084735	1(upper_aerodigestive_tract)	Uncertain significance\x2cUncertain significance|Likely benign|Uncertain significance|Uncertain significance	Lynch_syndrome\x2cHereditary_cancer-predisposing_syndrome|Lynch_syndrome|Colorectal_cancer\x2c_non-polyposis|not_specified	RCV000234307.1\x2cRCV000115699.5|RCV000123090.5|RCV000148736.1|RCV000212845.2	MedGen:Orphanet:SNOMED_CT\x2cMedGen:SNOMED_CT|MedGen:Orphanet:SNOMED_CT|MedGen|MedGen	C1333990:ORPHA144:315058005\x2cC0027672:699346009|C1333990:ORPHA144:315058005|CN221576|CN169374	0.0002	.	.	.	.	0.001	0.0004	9.61e-05	0	0	0	0.0002	0	0.0022	0.0002	0.0002	0.0001	.	.	0.0004	6.53e-05	0	0	0	0	0.0003	0	0.002	9.69e-05	0	0
7	20180673	rs141024206	T	A	448.8	PASS	1	4179894	1	MACC1	nonsynonymous SNV	.	.	.	.	.	.	.	0.0004	.	.	.	0.002	.	0.001	0.0002	8.65e-05	0	0.0003	0.0017	0	6.07e-05	0.0011	0.0005	0.0014	.	.	0.0008	0.0003	0.0001	0	0	0.0001	0.0017	0.0004	6.5e-05	0.0005	0.0003	0
7	20198446	rs367950914	C	A	903.1	PASS	2	022;325	1,1	MACC1	nonsynonymous SNV	.	.	.	.	.	.	.	0.0002	.	.	.	0.001	.	4.13e-05	0	0	0.0003	0	3e-05	0	0	.	.	.	.	.	6.92e-05	0	8.95e-05	0	0.0003	4.49e-05	6.3e-05	0.0002	0	.	.	.
7	20198693	.	G	C	1410	PASS	1	861	1	MACC1	nonsynonymous SNV	.	.	.	.	.	.	.	.	.	.	.	.	.	.	.	.	.	.	.	.	.	.	.	.	.	.	.	.	.	.	.	.	.	.	.	.	.	.
7	27204512	rs140596580	G	T	69	PASS	1	191	1	HOXA9	nonsynonymous SNV	.	.	.	.	.	.	.	0.0004	.	.	0.002	.	.	0.0003	0	0.0006	0.001	0	0.0003	0	0.0004	.	.	.	.	.	0.0004	0	0.0011	0	0.0008	0	0.0003	0.0004	0.0004	3.23e-05	0	0
7	27224368	rs143812636	C	G	285.2	PASS	1	1141	1	HOXA11	nonsynonymous SNV	.	.	.	.	.	.	.	0.0002	.	.	.	0.001	.	0.0006	0	0	0	0	0.0011	0	0	0.0004	.	0.0006	.	.	0.0004	0	0	0	0	0.0001	0.001	0	0	0.0007	0	0
7	27239135	.	G	T	123	PASS	1	4121621	1	HOXA13	nonsynonymous SNV	.	.	.	.	.	.	.	.	.	.	.	.	.	.	.	.	.	.	.	.	.	.	.	.	.	.	.	.	.	.	.	.	.	.	.	.	.	.
7	27872466	rs143697346	A	G	1058.6	PASS	3	1566;832;1164	1,1,1	JAZF1	nonsynonymous SNV	.	.	.	.	.	.	.	0.0004	.	.	.	0.002	.	0.001	0.0003	0.0003	0	0.0002	0.0017	0	0.0003	0.0008	.	0.0012	.	0.0082	0.0008	0.0003	0.0003	0	0	0.0003	0.0015	0.0006	0.0002	0.0006	0.0001	0
7	37947175	rs147145122	G	T	1401.8	PASS	2	007;055	2,1	SFRP4	nonsynonymous SNV	.	.	.	.	.	.	.	0.0004	.	0.0014	.	0.001	.	0.0005	0.0005	0.001	0	0	0.0006	0	0	0.0008	0.0005	0.001	.	.	0.0006	0.0005	0.001	0	0	0	0.0009	0.0004	0	0.0006	0.0003	0
7	37953841	rs149860855	G	A	451.2	PASS	2	027;544	1,1	SFRP4	nonsynonymous SNV	.	.	.	.	.	.	.	0.0002	0.0008	.	.	.	.	0.0004	0.0002	0.0002	0	0.0005	0.0006	0	0	0.0005	0.0002	0.0006	.	.	0.0004	6.53e-05	0.0005	0	0	0.0005	0.0006	0.0004	0	0.0003	0.0002	0
7	37956049	.	T	C	605.3	PASS	1	1459	1	SFRP4	nonsynonymous SNV	.	.	.	.	.	.	.	.	.	.	.	.	.	.	.	.	.	.	.	.	.	.	.	.	.	.	.	.	.	.	.	.	.	.	.	.	.	.
7	42005685	.	C	G	287.9	PASS	1	4161781	1	GLI3	nonsynonymous SNV	.	.	.	.	.	.	.	.	.	.	.	.	.	.	.	.	.	.	.	.	.	.	.	.	.	.	.	.	.	.	.	.	.	.	.	.	.	.
7	42007201	rs62622373	T	C	5891.5	PASS	4	264;352;794;842	1,1,1,1	GLI3	nonsynonymous SNV	COSM5020313	1(soft_tissue)	Likely benign|Likely benign|Likely benign	not_provided|Greig_cephalopolysyndactyly_syndrome|not_specified	RCV000224342.1|RCV000365837.1|RCV000421865.1	MedGen|MedGen:OMIM:SNOMED_CT|MedGen	CN221809|C0265306:175700:32985001|CN169374	0.0006	.	0.0014	.	0.002	.	0.0018	0.0002	0.0013	0	0.0006	0.0029	0.0044	6.07e-05	0.0022	0.0007	0.003	.	0.0082	0.002	0.0004	0.0018	0.0091	0	0.0002	0.0028	0.0033	9.75e-05	0.0012	0.0001	0.0036
7	42007279	.	C	A	1398.6	PASS	1	44	1	GLI3	nonsynonymous SNV	.	.	.	.	.	.	.	.	.	.	.	.	.	.	.	.	.	.	.	.	.	.	.	.	.	.	.	.	.	.	.	.	.	.	.	.	.	.
7	42011991	rs979364849	G	A	391.8	PASS	1	4128849	1	GLI3	nonsynonymous SNV	.	.	.	.	.	.	.	.	.	.	.	.	.	.	.	.	.	.	.	.	.	.	.	.	.	.	.	.	.	.	.	.	.	.	.	.	.	.
7	55220286	.	A	C	172.1	PASS	1	4124795	1	EGFR	nonsynonymous SNV	.	.	.	.	.	.	.	.	.	.	.	.	.	.	.	.	.	.	.	.	.	.	.	.	.	.	.	.	.	.	.	.	.	.	.	.	.	.
7	55259442	.	G	A	766.5	PASS	1	831	1	EGFR	nonsynonymous SNV	COSM20896	2(lung);1(thyroid)	.	.	.	.	.	.	.	.	.	.	.	.	.	.	.	.	.	.	.	.	.	.	.	.	.	.	.	.	.	.	.	.	.	.	.	.
7	55269020	rs182857647	C	T	519.6	PASS	1	4156551	1	EGFR	nonsynonymous SNV	.	.	.	.	.	.	.	0.0004	.	.	.	0.001	0.001	5.78e-05	0	0	0.0002	0	6.01e-05	0	6.06e-05	.	.	.	.	.	4.06e-05	0	0	0	0.0001	0	6.27e-05	0	3.25e-05	.	.	.
7	66459273	rs120074160	T	A	268	PASS	1	4199714	1	SBDS	stopgain	.	.	.	.	.	.	.	0.0006	.	0.0014	.	0.001	0.001	0.0004	0.0002	0.0011	0.0005	0.0003	0.0004	0	0.0003	.	.	.	.	.	0.0001	0	0.0003	0	0.0002	4.49e-05	0.0001	0	0.0003	0.0009	0.0007	0.0012
7	66460298	rs548436732	A	G	166.1	PASS	1	5	1	SBDS	nonsynonymous SNV	.	.	.	.	.	.	.	0.0002	.	0.0014	.	.	.	0.0001	0.0002	0.0005	0	0	9.03e-05	0	0	.	.	.	.	.	0.0002	0.0001	0.0004	0	0	0	0.0002	0.0002	0	6.46e-05	0	0
7	86469016	.	A	C	1172.2	PASS	1	475	1	GRM3	nonsynonymous SNV	.	.	.	.	.	.	.	.	.	.	.	.	.	.	.	.	.	.	.	.	.	.	.	.	.	.	.	.	.	.	.	.	.	.	.	.	.	.
7	91603087	.	A	T	234.6	PASS	1	4149246	1	AKAP9	nonsynonymous SNV	.	.	.	.	.	.	.	.	.	.	.	.	.	.	.	.	.	.	.	.	.	.	.	.	.	.	.	.	.	.	.	.	.	.	.	.	.	.
7	91630255	.	GA	G	306.9	PASS	1	4138464	1	AKAP9	frameshift deletion
7	91641932	.	C	T	1936.1	PASS	1	387	1	AKAP9	stopgain	.	.	.	.	.	.	.	.	.	.	.	.	.	.	.	.	.	.	.	.	.	.	.	.	.	.	.	.	.	.	.	.	.	.	.	.	.	.
7	91643610	rs139965373	G	A	594.5	PASS	1	1257	1	AKAP9	nonsynonymous SNV	.	.	Likely benign|Likely benign|Uncertain significance|Uncertain significance|Uncertain significance	Ventricular_fibrillation|not_provided|Long_QT_syndrome|Romano-Ward_syndrome|Long_QT_syndrome_11	RCV000157101.1|RCV000171716.1|RCV000233886.2|RCV000302445.1|RCV000477762.1	EFO:MedGen:SNOMED_CT|MedGen|MedGen:SNOMED_CT|MedGen:SNOMED_CT|MedGen:OMIM	EFO_0004287:C0042510:71908006|CN221809|C0023976:9651007|CN119492:20852007|C2678483:611820	0.0004	.	0.0029	.	.	.	0.0005	0.0002	0.0005	0	0	0.0007	0	0.0002	0.0006	.	0.0009	0.011	.	0.0006	6.54e-05	0.001	0.0053	0	0	0.0004	0.0015	0.0003	0.0003	0.0001	0.0024
7	91667736	rs150379637	A	G	281	PASS	1	280	1	AKAP9	nonsynonymous SNV	.	.	Likely benign|Uncertain significance|Uncertain significance	not_provided|Cardiovascular_phenotype|Long_QT_syndrome	RCV000171718.1|RCV000243341.1|RCV000475782.1	MedGen|MedGen|MedGen:SNOMED_CT	CN221809|CN230736|C0023976:9651007	0.0004	.	0.0014	.	0.001	.	0.0005	0.0002	0.0004	0	0	0.0009	0	0	0.0008	0.0005	0.001	.	0.0082	0.0006	6.62e-05	0.0009	0	0	4.49e-05	0.001	0.0007	0	0.0008	0	0.0036
7	91674405	rs150016098	T	C	420.3	PASS	1	4107559	1	AKAP9	nonsynonymous SNV	.	.	Benign|Likely benign|Likely benign	not_specified|not_provided|Long_QT_syndrome	RCV000123577.4|RCV000171719.1|RCV000456988.1	MedGen|MedGen|MedGen:SNOMED_CT	CN169374|CN221809|C0023976:9651007	0.0002	0.0008	.	.	.	.	0.0009	9.63e-05	8.64e-05	0	0.0005	0.0015	0	0.0002	0.0004	0.0002	0.0005	.	.	0.0007	0.0001	2.98e-05	0	0	0.0009	0.0013	0.0009	0.0002	0.0005	0.0006	0
7	91694604	rs61757671	G	A	928.7	PASS	1	4199848	1	AKAP9	nonsynonymous SNV	.	.	Likely benign|Likely benign|Uncertain significance|Uncertain significance|other	not_provided|Cardiovascular_phenotype|not_specified|Romano-Ward_syndrome|Long_QT_syndrome	RCV000171720.3|RCV000252240.1|RCV000259143.1|RCV000267059.1|RCV000361700.1	MedGen|MedGen|MedGen|MedGen:SNOMED_CT|MedGen:SNOMED_CT	CN221809|CN230736|CN169374|CN119492:20852007|C0023976:9651007	0.0004	.	.	.	0.001	0.001	0.0012	0.0004	0.0003	0	0.0003	0.002	0	6.12e-05	0.0027	0.0007	0.0037	.	0.0082	0.0011	0.0006	0.0004	0	0	0.0002	0.0021	0.0013	9.76e-05	0.0014	0.0007	0.0012
7	91708791	.	GA	G	943.8	PASS	1	800	1	AKAP9	frameshift deletion
7	91726960	rs61757664	G	A	1326.6	PASS	2	770;4126692	1,2	AKAP9	nonsynonymous SNV	.	.	Likely benign|Uncertain significance|Uncertain significance|Uncertain significance|Uncertain significance	not_provided|Long_QT_syndrome_11|Cardiovascular_phenotype|Long_QT_syndrome|Romano-Ward_syndrome	RCV000171729.1|RCV000185546.2|RCV000250716.1|RCV000304827.1|RCV000361837.1	MedGen|MedGen:OMIM|MedGen|MedGen:SNOMED_CT|MedGen:SNOMED_CT	CN221809|C2678483:611820|CN230736|C0023976:9651007|CN119492:20852007	0.0002	0.0008	.	.	.	.	0.0005	0.0002	0	0	0	0.0008	0.0033	0.0004	0.0007	0.0005	0.0008	0.011	.	0.0006	0.0002	0.0004	0.0028	0	0	0.0006	0.0022	0.0006	0.0004	0	0
7	91727479	rs139046510	A	T	456.6	PASS	2	577;4178310	1,1	AKAP9	nonsynonymous SNV	COSM6050031;COSM6050030	1(large_intestine)	Likely benign|Likely benign|Likely benign|other|Uncertain significance	not_provided|not_specified|Cardiovascular_phenotype|Long_QT_syndrome|Romano-Ward_syndrome	RCV000170642.3|RCV000185490.2|RCV000250287.1|RCV000272838.1|RCV000365126.1	MedGen|MedGen|MedGen|MedGen:SNOMED_CT|MedGen:SNOMED_CT	CN221809|CN169374|CN230736|C0023976:9651007|CN119492:20852007	0.0006	.	.	.	0.003	.	0.0009	0.0002	0.0007	0	0	0.0014	0.0011	0	0.0008	.	0.0013	.	.	0.0009	6.55e-05	0.0007	0.0031	0	0	0.0015	0.0018	0	0.0009	0.0003	0.0036
7	92404108	.	CTCTG	C	246.8	PASS	1	1386	1	CDK6	frameshift deletion
7	98478790	.	C	A	372	PASS	1	4170686	1	TRRAP	nonsynonymous SNV	.	.	.	.	.	.	.	.	.	.	.	.	.	.	.	.	.	.	.	.	.	.	.	.	.	.	.	.	.	.	.	.	.	.	.	.	.	.
7	98524978	.	C	G	348.3	PASS	1	314	1	TRRAP	nonsynonymous SNV	.	.	.	.	.	.	.	.	.	.	.	.	.	.	.	.	.	.	.	.	.	.	.	.	.	.	.	.	.	.	.	.	.	.	.	.	.	.
7	98547344	.	G	A	596.7	PASS	1	658	1	TRRAP	nonsynonymous SNV	.	.	.	.	.	.	.	.	.	.	.	.	.	.	.	.	.	.	.	.	.	.	.	.	.	.	.	.	.	.	.	.	.	.	.	.	.	.
7	98557019	rs1182687777	G	A	463.1	PASS	1	4110996	1	TRRAP	nonsynonymous SNV	.	.	.	.	.	.	.	.	.	.	.	.	.	.	.	.	.	.	.	.	.	.	.	.	.	.	.	.	.	.	.	.	.	.	.	.	.	.
7	98565248	rs904892331	G	A	269.1	PASS	1	4108988	1	TRRAP	nonsynonymous SNV	.	.	.	.	.	.	.	.	.	.	.	.	.	.	.	.	.	.	.	.	.	.	.	.	.	.	.	.	.	.	.	.	.	.	.	.	.	.
7	98567768	rs1396482116	A	G	420.4	PASS	1	4130865	1	TRRAP	nonsynonymous SNV	.	.	.	.	.	.	.	.	.	.	.	.	.	.	.	.	.	.	.	.	.	.	.	.	.	.	.	.	.	.	.	.	.	.	.	.	.	.
7	98569465	.	G	C	3757	PASS	1	664	1	TRRAP	nonsynonymous SNV	.	.	.	.	.	.	.	.	.	.	.	.	.	.	.	.	.	.	.	.	.	.	.	.	.	.	.	.	.	.	.	.	.	.	.	.	.	.
7	98601827	rs201183421	G	A	1421.4	PASS	1	116	1	TRRAP	nonsynonymous SNV	COSM1230624;COSM1230623	1(large_intestine)	.	.	.	.	.	0.0002	.	.	.	.	0.001	0.0006	9.91e-05	0.0002	0	0	0.0006	0.0011	0.0015	0.0002	0.0002	0.0001	.	.	0.0005	6.56e-05	0.0003	0	0	4.49e-05	0.0006	0.0006	0.0015	3.23e-05	0.0001	0
7	101840096	rs147066011	A	G	538.1	PASS	1	4124542	1	CUX1	nonsynonymous SNV	.	.	.	.	.	.	.	0.0002	.	.	.	0.001	.	0.0013	0.0004	0	0	0.0009	0.0023	0.0011	0	0.0018	.	0.0028	.	.	0.0012	0.0003	5.96e-05	0.0007	0	0.0006	0.0023	0.0009	0	0.0008	0.0002	0
7	101840195	.	A	C	372.2	PASS	1	4193646	1	CUX1	nonsynonymous SNV	.	.	.	.	.	.	.	.	.	.	.	.	.	.	.	.	.	.	.	.	.	.	.	.	.	.	.	.	.	.	.	.	.	.	.	.	.	.
7	101840206	rs200925683	G	A	1612.9	PASS	2	1260;175	1,1	CUX1	nonsynonymous SNV	.	.	.	.	.	.	.	0.0002	.	0.0014	.	.	.	7.42e-05	0	0.0007	0	0	1.5e-05	0	0	.	.	.	.	.	0.0001	0	0.0008	0	0	0	1.79e-05	0.0002	0	9.69e-05	0	0.0036
7	101840277	.	T	A	175.6	PASS	1	4108988	1	CUX1	nonsynonymous SNV	.	.	.	.	.	.	.	.	.	.	.	.	.	.	.	.	.	.	.	.	.	.	.	.	.	.	.	.	.	.	.	.	.	.	.	.	.	.
7	101845455	rs560189390	G	A	594.5	PASS	1	4158769	1	CUX1	nonsynonymous SNV	.	.	.	.	.	.	.	.	.	.	.	.	.	.	.	.	.	.	.	.	.	.	.	.	.	.	.	.	.	.	.	.	.	.	.	3.23e-05	0	0
7	101925163	.	G	C	296.2	PASS	1	185	1	CUX1	nonsynonymous SNV	.	.	.	.	.	.	.	.	.	.	.	.	.	.	.	.	.	.	.	.	.	.	.	.	.	.	.	.	.	.	.	.	.	.	.	.	.	.
7	116339677	.	T	A	1061.6	PASS	1	1326	1	MET	nonsynonymous SNV	.	.	.	.	.	.	.	.	.	.	.	.	.	.	.	.	.	.	.	.	.	.	.	.	.	.	.	.	.	.	.	.	.	.	.	.	.	.
7	116340177	rs200074800	G	A	301.6	PASS	1	188	1	MET	nonsynonymous SNV	COSM4644770	1(large_intestine)	other|not provided	Renal_cell_carcinoma\x2c_papillary\x2c_1|not_specified	RCV000119117.8|RCV000121345.1	MedGen:OMIM:Orphanet:SNOMED_CT|MedGen	C0007134:605074:ORPHA217071:41607009|CN169374	0.0004	0.0015	.	.	.	.	0.0005	0.0004	8.75e-05	0	0	0.0007	0	7.02e-05	0.0011	0.001	0.0011	.	.	0.0004	0.0003	6.14e-05	0	0	0	0.0009	0.0002	7.01e-05	0.0006	0.0002	0
7	116371911	.	C	A	155.1	PASS	1	171	1	MET	nonsynonymous SNV	.	.	.	.	.	.	.	.	.	.	.	.	.	.	.	.	.	.	.	.	.	.	.	.	.	.	.	.	.	.	.	.	.	.	.	.	.	.
7	116411923	rs34589476	C	T	380.9	PASS	1	4109956	1	MET	nonsynonymous SNV	.	.	other|Uncertain significance|other|Likely benign|Likely pathogenic	not_provided|not_specified|Renal_cell_carcinoma\x2c_papillary\x2c_1|Hereditary_cancer-predisposing_syndrome|Neoplasm	RCV000034528.7|RCV000121339.2|RCV000123119.7|RCV000131706.2|RCV000444296.1	MedGen|MedGen|MedGen:OMIM:Orphanet:SNOMED_CT|MedGen:SNOMED_CT|MeSH:MedGen:SNOMED_CT	CN221809|CN169374|C0007134:605074:ORPHA217071:41607009|C0027672:699346009|D009369:C0027651:108369006	0.001	.	0.0014	.	0.004	.	0.0029	0.0008	0.0008	0.0004	0.0011	0.0045	0.0011	0.0008	0.0035	0.0008	0.0048	.	.	0.0029	0.0008	0.0012	0.0015	0.0002	0.0008	0.0053	0.0026	0.0007	0.0023	0.0008	0.0012
7	116415124	rs370529693	C	T	1217.8	PASS	1	1187	1	MET	nonsynonymous SNV	.	.	Uncertain significance|Uncertain significance	Renal_cell_carcinoma\x2c_papillary\x2c_1|Hereditary_cancer-predisposing_syndrome	RCV000123121.3|RCV000164064.1	MedGen:OMIM:Orphanet:SNOMED_CT|MedGen:SNOMED_CT	C0007134:605074:ORPHA217071:41607009|C0027672:699346009	0.0002	.	0.0014	.	.	.	0.0001	0	0.0003	0	0	0.0001	0	0	0.0001	.	0.0001	.	.	0.0001	0	0.0003	0	0	0	0.0002	0.0002	0	9.68e-05	0.0001	0
7	116436003	.	TG	T	1074.5	PASS	1	854	1	MET	frameshift deletion
7	124482897	rs143635917	T	C	626.8	PASS	1	4166940	1	POT1	nonsynonymous SNV	.	.	.	.	.	.	.	0.0002	.	.	.	0.001	.	0.0004	9.62e-05	0.0003	0	0	0.0006	0	0	0.0005	0.0002	0.0007	.	.	0.0004	0	0.0004	0.0038	0	0	0.0005	0.0002	0	0.0005	0	0
7	124511092	.	T	C	1418.7	PASS	1	47	1	POT1	nonsynonymous SNV	.	.	.	.	.	.	.	.	.	.	.	.	.	.	.	.	.	.	.	.	.	.	.	.	.	.	.	.	.	.	.	.	.	.	.	.	.	.
7	127721448	rs1219037625	G	A	157.8	PASS	1	715	1	SND1	nonsynonymous SNV	.	.	.	.	.	.	.	.	.	.	.	.	.	.	.	.	.	.	.	.	.	.	.	.	.	.	.	.	.	.	.	.	.	.	.	.	.	.
7	128829039	rs570242755	G	GGCT	225	PASS	1	4103141	1	SMO	nonframeshift insertion	COSM1169629	2(stomach)	.	.	.	.	.	0.0028	0.0045	0.0014	.	0.004	0.0031	0	.	.	.	.	.	.	.	0.021	0.0058	0.028	.	.	0.0167	.	.	.	.	0	0.0175	0	.	0.0225	0.0065	0.0229
7	137565269	.	T	C	468.3	PASS	1	4131095	1	CREB3L2	nonsynonymous SNV	.	.	.	.	.	.	.	.	.	.	.	.	.	.	.	.	.	.	.	.	.	.	.	.	.	.	.	.	.	.	.	.	.	.	.	.	.	.
7	137597812	.	A	G	633.6	PASS	1	1413	1	CREB3L2	nonsynonymous SNV	.	.	.	.	.	.	.	.	.	.	.	.	.	.	.	.	.	.	.	.	.	.	.	.	.	.	.	.	.	.	.	.	.	.	.	.	.	.
7	138522877	rs946825291	G	A	444.5	PASS	1	352	1	KIAA1549	nonsynonymous SNV	COSM4962816	1(pancreas)	.	.	.	.	.	.	.	.	.	.	.	.	.	.	.	.	.	.	.	.	.	.	.	.	.	.	.	.	.	.	.	.	.	.	.	.
7	138537008	rs902568442	T	C	823.2	PASS	1	4141476	1	KIAA1549	nonsynonymous SNV	.	.	.	.	.	.	.	.	.	.	.	.	.	.	.	.	.	.	.	.	.	.	.	.	.	.	.	.	.	.	.	.	.	.	.	.	.	.
7	138552852	.	T	C	489.1	PASS	1	584	1	KIAA1549	nonsynonymous SNV	.	.	.	.	.	.	.	.	.	.	.	.	.	.	.	.	.	.	.	.	.	.	.	.	.	.	.	.	.	.	.	.	.	.	.	.	.	.
7	138552872	rs572540609	G	A	299.8	PASS	1	4135278	1	KIAA1549	nonsynonymous SNV	.	.	.	.	.	.	.	0.0004	.	.	.	.	0.002	0.0004	0	0.0001	0	0	0	0.0027	0.0023	.	.	.	.	.	0.0003	6.74e-05	0	0	0	0	2.71e-05	0	0.002	.	.	.
7	140439694	.	C	T	313.1	PASS	1	4110378	1	BRAF	nonsynonymous SNV	COSM26447	1(stomach);1(endometrium)	.	.	.	.	.	.	.	.	.	.	.	.	.	.	.	.	.	.	.	.	.	.	.	.	.	.	.	.	.	.	.	.	.	.	.	.
7	143053713	rs143238060	C	T	2239.4	PASS	2	1076;757	1,1	FAM131B	nonsynonymous SNV	.	.	.	.	.	.	.	0.0004	0.0008	0.0014	.	.	.	0.0008	0.0003	0.0008	0	0	0.0012	0.0022	0.0002	0.0006	.	0.0009	.	.	0.0009	0.0003	0.001	0	0	0	0.0015	0.0013	9.75e-05	0.0006	0.0002	0.0012
7	143054028	rs74932743	T	C	133.8	PASS	1	4163297	1	FAM131B	nonsynonymous SNV	.	.	.	.	.	.	.	0.0006	.	.	.	0.001	0.002	0.0006	9.74e-05	0	0	0	0.0007	0	0.0019	0.0008	0.0002	0.001	.	.	0.0006	0.0001	8.93e-05	0	0	0	0.0007	0.0005	0.0021	0.0005	0	0
7	147674954	rs147532036	G	C	675.8	PASS	1	297	1	CNTNAP2	nonsynonymous SNV	.	.	.	.	.	.	.	0.0002	.	0.0014	.	.	.	1.65e-05	0	8.64e-05	0	0	1.5e-05	0	0	.	.	.	.	.	1.63e-05	0	8.93e-05	0	0	0	8.96e-06	0	0	.	.	.
7	148080827	rs571404876	G	A	217.3	PASS	1	1441	1	CNTNAP2	nonsynonymous SNV	.	.	.	.	.	.	.	0.0002	.	.	.	.	0.001	1.65e-05	0	0	0	0	1.5e-05	0	6.06e-05	.	.	.	.	.	3.66e-05	0	0.0001	0.0001	5.8e-05	0	0	0.0002	6.5e-05	3.23e-05	0.0001	0
7	148515137	rs1441187386	G	A	1787.3	PASS	1	339	1	EZH2	nonsynonymous SNV	COSM1205909;COSM1205908	1(skin);1(large_intestine)	.	.	.	.	.	.	.	.	.	.	.	.	.	.	.	.	.	.	.	.	.	.	.	.	.	.	.	.	.	.	.	.	.	.	.	.
7	151842343	.	C	T	352.4	PASS	1	1168	1	KMT2C	nonsynonymous SNV	.	.	.	.	.	.	.	.	.	.	.	.	.	.	.	.	.	.	.	.	.	.	.	.	.	.	.	.	.	.	.	.	.	.	.	.	.	.
7	151843784	rs142657994	A	C	367	PASS	1	275	1	KMT2C	nonsynonymous SNV	.	.	.	.	.	.	.	0.0002	.	.	.	0.001	.	0.0004	9.72e-05	8.68e-05	0	0.0011	0.0005	0	6.07e-05	0.0004	.	0.0006	.	.	0.0004	0.0001	0.0001	0	0	0.0013	0.0005	0.0005	9.75e-05	0.0006	0.0001	0
7	151845823	.	T	C	1676.3	PASS	1	57	1	KMT2C	nonsynonymous SNV	.	.	.	.	.	.	.	.	.	.	.	.	.	.	.	.	.	.	.	.	.	.	.	.	.	.	.	.	.	.	.	.	.	.	.	.	.	.
7	151849963	.	G	C	218.5	PASS	1	1418	1	KMT2C	nonsynonymous SNV	.	.	.	.	.	.	.	.	.	.	.	.	.	.	.	.	.	.	.	.	.	.	.	.	.	.	.	.	.	.	.	.	.	.	.	.	.	.
7	151849978	.	T	C	1616	PASS	1	383	1	KMT2C	nonsynonymous SNV	.	.	.	.	.	.	.	.	.	.	.	.	.	.	.	.	.	.	.	.	.	.	.	.	.	.	.	.	.	.	.	.	.	.	.	.	.	.
7	151851379	.	G	A	546.1	PASS	1	4164330	1	KMT2C	nonsynonymous SNV	.	.	.	.	.	.	.	.	.	.	.	.	.	.	.	.	.	.	.	.	.	.	.	.	.	.	.	.	.	.	.	.	.	.	.	.	.	.
7	151854907	.	C	T	414.7	PASS	1	1464	1	KMT2C	nonsynonymous SNV
7	151859914	rs546643392	G	A	307.3	PASS	1	192	1	KMT2C	nonsynonymous SNV	COSM4384307;COSM4384308	1(haematopoietic_and_lymphoid_tissue)	.	.	.	.	.	0.0002	.	.	.	.	0.001	9.06e-05	0	0	0.0001	0	0.0001	0	6.06e-05	.	.	.	.	.	4.88e-05	0	0	0	5.8e-05	0	8.98e-05	0	3.25e-05	3.23e-05	0.0001	0
7	151860025	.	T	C	942.2	PASS	1	1053	1	KMT2C	nonsynonymous SNV	.	.	.	.	.	.	.	.	.	.	.	.	.	.	.	.	.	.	.	.	.	.	.	.	.	.	.	.	.	.	.	.	.	.	.	.	.	.
7	151866318	.	T	C	513.5	PASS	1	4128970	1	KMT2C	nonsynonymous SNV	.	.	.	.	.	.	.	.	.	.	.	.	.	.	.	.	.	.	.	.	.	.	.	.	.	.	.	.	.	.	.	.	.	.	.	.	.	.
7	151874175	.	T	C	342.9	PASS	1	4194218	1	KMT2C	nonsynonymous SNV	.	.	.	.	.	.	.	.	.	.	.	.	.	.	.	.	.	.	.	.	.	.	.	.	.	.	.	.	.	.	.	.	.	.	.	.	.	.
7	151875013	rs900510100	C	T	386.2	PASS	1	4159421	1	KMT2C	nonsynonymous SNV	.	.	.	.	.	.	.	.	.	.	.	.	.	.	.	.	.	.	.	.	.	.	.	.	.	.	0	0	0	0	0	0	0	0	0	.	.	.
7	151875093	rs530218895	A	G	151	PASS	1	353	1	KMT2C	nonsynonymous SNV	.	.	.	.	.	.	.	0.0002	.	.	.	.	0.001	0.0002	0	0.0003	0	0	2.11e-05	0.0016	0.0016	.	.	.	.	.	0.0002	0	0	0	0	0	2e-05	0	0.0024	.	.	.
7	151878209	.	T	G	1231.6	PASS	1	316	1	KMT2C	nonsynonymous SNV	.	.	.	.	.	.	.	.	.	.	.	.	.	.	.	.	.	.	.	.	.	.	.	.	.	.	.	.	.	.	.	.	.	.	.	.	.	.
7	151879194	.	T	A	374.6	PASS	1	343	1	KMT2C	nonsynonymous SNV	.	.	.	.	.	.	.	.	.	.	.	.	.	.	.	.	.	.	.	.	.	.	.	.	.	.	.	.	.	.	.	.	.	.	.	.	.	.
7	151891116	.	C	A	676.6	PASS	1	4177842	1	KMT2C	nonsynonymous SNV	.	.	.	.	.	.	.	.	.	.	.	.	.	.	.	.	.	.	.	.	.	.	.	.	.	.	.	.	.	.	.	.	.	.	.	.	.	.
7	151949698	rs140919432	G	T	282	PASS	1	4177434	1	KMT2C	nonsynonymous SNV	.	.	not provided	not_specified	RCV000121450.1	MedGen	CN169374	0.001	.	0.0014	.	0.004	.	0.0009	0.0003	0.0003	0	0.0002	0.0014	0.0011	0	0.0015	0.0007	0.0019	.	.	0.0008	0.0002	0.0002	0	0	8.99e-05	0.0015	0.0005	0	0.001	0.0003	0
8	1824809	rs144004435	C	T	761.1	PASS	1	4176046	1	ARHGEF10	nonsynonymous SNV	COSM5091266;COSM50657;COSM1455888	2(large_intestine)	.	.	.	.	.	0.0006	0.0023	.	.	.	.	6.59e-05	0.0008	0	0	0	0	0	0	0.0002	0.0005	.	.	.	5.28e-05	0.0008	0	0	0	0	8.95e-06	0	0	0.0002	0.0006	0
8	1871748	rs146766107	G	A	1687.3	PASS	1	1166	1	ARHGEF10	nonsynonymous SNV	.	.	.	.	.	.	.	0.0004	.	.	0.002	.	.	2.49e-05	0	0	0.0002	0	1.51e-05	0	0	0.0001	.	0.0001	.	.	4.07e-05	0	0	0	0.0003	0	4.49e-05	0	0	3.23e-05	0	0
8	1876804	rs35925274	C	T	161.2	PASS	1	278	1	ARHGEF10	nonsynonymous SNV	COSM6039099;COSM6039100	1(large_intestine)	.	.	.	.	.	0.001	.	.	0.003	0.002	.	0.0006	0.0004	8.71e-05	0.001	0	0.0007	0	0.0007	0.0005	0.0002	0.0006	.	.	0.0005	0.0003	2.98e-05	0	0.0006	0	0.0008	0	0.0008	0.0004	0.0006	0
8	17797566	rs377606947	G	A	1636.3	PASS	1	885	1	PCM1	nonsynonymous SNV
8	17797633	.	A	G	284.5	PASS	1	373	1	PCM1	nonsynonymous SNV
8	17804695	rs140481840	G	A	503.5	PASS	1	4191799	1	PCM1	nonsynonymous SNV	COSM2873451	1(haematopoietic_and_lymphoid_tissue)	.	.	.	.	.	0.0006	.	.	0.003	.	.	0.0003	0	0	0.004	0	3.06e-05	0.0012	0	.	.	.	.	.	0.0003	0	0	0	0.0044	0	2.82e-05	0.0002	3.66e-05	3.23e-05	0	0
8	17812999	rs557994502	G	A	127.4	PASS	1	1564	1	PCM1	nonsynonymous SNV	.	.	.	.	.	.	.	0.0004	.	.	.	0.002	.	5.24e-05	0	0	0	0	7.62e-05	0	7.52e-05	.	.	.	.	.	2.49e-05	0	0	0	0	0	3.65e-05	0	6.74e-05	3.23e-05	0.0001	0
8	17819588	rs1272767267	C	T	1324.8	PASS	1	873	1	PCM1	nonsynonymous SNV	.	.	.	.	.	.	.	.	.	.	.	.	.	.	.	.	.	.	.	.	.	.	.	.	.	.	.	.	.	.	.	.	.	.	.	.	.	.
8	17843002	rs1034547799	T	G	623.6	PASS	1	1179	1	PCM1	nonsynonymous SNV	.	.	.	.	.	.	.	.	.	.	.	.	.	.	.	.	.	.	.	.	.	.	.	.	.	.	.	.	.	.	.	.	.	.	.	.	.	.
8	17883107	rs761221628	G	A	724.6	PASS	1	4167381	1	PCM1	nonsynonymous SNV	.	.	.	.	.	.	.	.	.	.	.	.	.	.	.	.	.	.	.	.	.	.	.	.	.	.	.	.	.	.	.	.	.	.	.	.	.	.
8	28413359	.	C	T	1159.4	PASS	1	350	1	FZD3	nonsynonymous SNV	.	.	.	.	.	.	.	.	.	.	.	.	.	.	.	.	.	.	.	.	.	.	.	.	.	.	.	.	.	.	.	.	.	.	.	.	.	.
8	28420428	rs147574227	G	A	434	PASS	1	4124542	1	FZD3	nonsynonymous SNV	.	.	.	.	.	.	.	0.0002	.	.	.	.	0.001	0.0002	0.0002	8.66e-05	0	0.0002	0.0003	0	6.06e-05	0.0002	0.0002	0.0001	.	.	0.0002	0.0004	0.0001	0	0	4.48e-05	0.0003	0.0002	3.25e-05	9.69e-05	0	0
8	29961860	.	C	T	255.3	PASS	1	27	1	LEPROTL1	nonsynonymous SNV	.	.	.	.	.	.	.	.	.	.	.	.	.	.	.	.	.	.	.	.	.	.	.	.	.	.	.	.	.	.	.	.	.	.	.	.	.	.
8	30922465	.	T	G	817.4	PASS	1	63	1	WRN	nonsynonymous SNV	.	.	.	.	.	.	.	.	.	.	.	.	.	.	.	.	.	.	.	.	.	.	.	.	.	.	.	.	.	.	.	.	.	.	.	.	.	.
8	30922580	.	G	A	1620.9	PASS	1	156	1	WRN	splice_donor
8	30948045	rs150148567	A	G	437	PASS	1	4137230	1	WRN	nonsynonymous SNV	COSM1496821	1(kidney)	Uncertain significance\x2cUncertain significance	Werner_syndrome\x2cWerner_syndrome	RCV000459455.1\x2cRCV000227669.3	MedGen:OMIM:Orphanet:SNOMED_CT\x2cMedGen:OMIM:Orphanet:SNOMED_CT	C0043119:277700:ORPHA902:51626007\x2cC0043119:277700:ORPHA902:51626007	0.0004	.	.	.	0.002	.	0.001	0.0004	0.0002	0	0.0015	0.0016	0.0011	6.06e-05	0.0021	0.0007	0.0028	.	.	0.0014	0.0004	0.001	0	0	0.0037	0.0019	0.0018	3.25e-05	0.0013	0.0007	0
8	30948355	.	G	T	314.1	PASS	1	4108588	1	WRN	stopgain	.	.	.	.	.	.	.	.	.	.	.	.	.	.	.	.	.	.	.	.	.	.	.	.	.	.	.	.	.	.	.	.	.	.	.	.	.	.
8	30954292	rs569266355	A	G	1132.9	PASS	1	1	1	WRN	nonsynonymous SNV	.	.	.	.	.	.	.	0.0002	.	.	.	0.001	.	8.34e-06	0	0	0	0	1.51e-05	0	0	.	.	.	.	.	4.09e-06	0	0	0	0	0	8.98e-06	0	0	.	.	.
8	31012237	rs78488552	C	G	2296	PASS	9	011;063;1386;290;709;026;4128852;4176584;4198519	1,1,1,1,1,1,1,1,1	WRN	nonsynonymous SNV	.	.	Uncertain significance|other	not_specified|Werner_syndrome	RCV000122293.2|RCV000231281.3	MedGen|MedGen:OMIM:Orphanet:SNOMED_CT	CN169374|C0043119:277700:ORPHA902:51626007	0.0008	.	.	.	0.004	.	0.0027	0.001	0.0007	0	0.0003	0.0047	0	0	0.0035	0.0005	0.005	.	.	0.0028	0.001	0.001	0.0011	5.8e-05	0.0003	0.0053	0.0026	0	0.002	0.0014	0.0012
8	32406255	rs868078016	G	A	328.3	PASS	1	4118156	1	NRG1	nonsynonymous SNV	.	.	.	.	.	.	.	.	.	.	.	.	.	.	.	.	.	.	.	.	.	.	.	.	.	.	.	.	.	.	.	.	.	.	.	.	.	.
8	32617879	rs540140464	C	A	692	PASS	1	1162	1	NRG1	nonsynonymous SNV	.	.	.	.	.	.	.	0.0002	.	0.0014	.	.	.	8.25e-06	0	8.65e-05	0	0	0	0	0	.	.	.	.	.	4.07e-06	0	2.98e-05	0	0	0	0	0	0	.	.	.
8	32621637	rs80189821	C	T	320	PASS	1	4138885	1	NRG1	nonsynonymous SNV	.	.	.	.	.	.	.	0.001	.	.	.	0.002	0.0031	0.0012	9.62e-05	0	0	0.0038	0.0012	0.0011	0.0023	0.0004	.	0.0006	.	.	0.0012	0	0.0001	0.0001	0	0.0037	0.001	0.0011	0.0031	0.0032	0	0.0036
8	41542151	rs141408004	A	C	599.7	PASS	7	1507;160;307;361;577;802;283	1,1,1,1,1,1,1	ANK1	nonsynonymous SNV	.	.	.	.	.	.	.	0.0002	.	.	.	0.001	.	0.0005	0	0.0025	0	0	0.0004	0	6.06e-05	0.0003	0.0002	0.0003	.	0.0082	0.0005	0	0.0018	0	0	0	0.0004	0.002	3.25e-05	0.0003	0.0001	0.0036
8	41547827	rs145562489	G	A	710.9	PASS	2	676;684	1,1	ANK1	nonsynonymous SNV	.	.	.	.	.	.	.	0.0002	.	.	.	0.001	.	0.0008	0	0.0003	0	0	0.0012	0.0022	0.0003	0.0005	.	0.0008	.	.	0.0009	0	0.0003	0.0122	0	0	0.0007	0.0005	0.0003	0.0003	0.0001	0
8	41548021	rs113948846	G	A	1018.9	PASS	4	1338;558;769;821	1,1,1,1	ANK1	nonsynonymous SNV	COSM1099865;COSM1597715	1(endometrium)	.	.	.	.	.	0.0002	.	.	.	0.001	.	0.0002	0	0.0007	0.0001	0	0.0002	0	0.0001	0.0001	.	0.0001	.	.	0.0003	0	0.0008	0	5.8e-05	4.49e-05	0.0003	0	6.5e-05	9.68e-05	0.0001	0
8	41550261	rs148275567	G	A	230	PASS	1	4194218	1	ANK1	nonsynonymous SNV	.	.	.	.	.	.	.	0.0002	0.0008	.	.	.	.	0.0003	0.0003	0	0.0007	0.0009	0.0002	0	6.06e-05	0.0004	0.0002	0.0005	.	.	0.0003	0.0003	0	0	0.0004	0.0014	0.0002	0.0004	3.25e-05	0.0004	0.0003	0
8	41552202	rs368279119	C	T	231.6	PASS	1	264	1	ANK1	nonsynonymous SNV	COSM4962766;COSM4962767	1(pancreas)	.	.	.	.	.	0.0002	.	.	.	0.001	.	4.97e-05	0.0002	0	0	0.0005	1.51e-05	0	0	0.0001	.	0.0001	.	.	3.66e-05	0	5.96e-05	0	0	0.0002	1.79e-05	0	0	6.47e-05	0.0001	0
8	41561560	rs185448932	G	A	247.6	PASS	1	4108627	1	ANK1	nonsynonymous SNV	.	.	.	.	.	.	.	0.0008	0.0023	.	.	.	0.001	5.77e-05	0.0003	0	0.0001	0	3e-05	0	6.06e-05	.	.	.	.	.	4.07e-05	0.0002	2.98e-05	0	5.8e-05	0	2.69e-05	0	6.5e-05	.	.	.
8	41575677	rs142626656	G	A	455.7	PASS	2	006;751	1,1	ANK1	nonsynonymous SNV	.	.	.	.	.	.	.	0.0008	.	0.0029	.	0.002	.	0.0006	0	0.0006	0	0.0002	0.0009	0	0	0.0007	.	0.001	.	.	0.0007	6.54e-05	0.001	0	0	0.0001	0.0011	0.0007	0	0.0007	0	0
8	41577289	rs147608206	C	T	362.2	PASS	1	1220	1	ANK1	nonsynonymous SNV	.	.	.	.	.	.	.	0.001	.	0.0043	.	0.002	.	0.0011	9.61e-05	0.0016	0	0.0002	0.0015	0.0011	0.0005	0.0015	0.0005	0.002	.	.	0.0012	0.0003	0.0016	0.0015	0	8.97e-05	0.0018	0.0007	0.0004	0.0008	0.0002	0
8	41790087	.	A	G	305.5	PASS	1	886	1	KAT6A	nonsynonymous SNV	.	.	.	.	.	.	.	.	.	.	.	.	.	.	.	.	.	.	.	.	.	.	.	.	.	.	.	.	.	.	.	.	.	.	.	.	.	.
8	41790132	.	G	A	379.9	PASS	1	4108988	1	KAT6A	nonsynonymous SNV	.	.	.	.	.	.	.	.	.	.	.	.	.	.	.	.	.	.	.	.	.	.	.	.	.	.	.	.	.	.	.	.	.	.	.	.	.	.
8	41798556	rs200762586	C	T	551.6	PASS	3	090;182;721	1,1,1	KAT6A	nonsynonymous SNV	COSM1099935	1(stomach);1(endometrium)	.	.	.	.	.	0.0002	.	0.0014	.	.	.	4.12e-05	0	0.0003	0	0	3e-05	0	0	.	.	.	.	.	6.91e-05	0	0.0004	0	0	0	3.58e-05	0.0002	0	.	.	.
8	41801377	.	T	C	479.2	PASS	1	4128355	1	KAT6A	nonsynonymous SNV	.	.	.	.	.	.	.	.	.	.	.	.	.	.	.	.	.	.	.	.	.	.	.	.	.	.	.	.	.	.	.	.	.	.	.	.	.	.
8	41906291	.	T	C	1466.8	PASS	1	1203	1	KAT6A	nonsynonymous SNV	.	.	.	.	.	.	.	.	.	.	.	.	.	.	.	.	.	.	.	.	.	.	.	.	.	.	.	.	.	.	.	.	.	.	.	.	.	.
8	42819530	.	A	G	2410.5	PASS	1	509	1	HOOK3	nonsynonymous SNV	.	.	.	.	.	.	.	.	.	.	.	.	.	.	.	.	.	.	.	.	.	.	.	.	.	.	.	.	.	.	.	.	.	.	.	.	.	.
8	42823322	rs139710426	G	A	527.6	PASS	2	4124542;4127766	1,1	HOOK3	nonsynonymous SNV	COSM1285416	1(autonomic_ganglia)	.	.	.	.	.	0.0004	0.0008	.	0.001	.	.	0.0001	0.0004	0	0.0001	0.0002	0.0002	0	0	0.0002	0.0005	.	.	.	0.0001	0.0003	2.98e-05	0	0	0.0001	0.0002	0	3.26e-05	0.0007	0.0002	0
8	42868518	rs971624319	A	C	1485	PASS	1	1062	1	HOOK3	nonsynonymous SNV	.	.	.	.	.	.	.	.	.	.	.	.	.	.	.	.	.	.	.	.	.	.	.	.	.	.	.	.	.	.	.	.	.	.	.	.	.	.
8	52320642	rs200978094	C	A	1303.9	PASS	1	1568	1	PXDNL	nonsynonymous SNV	.	.	.	.	.	.	.	0.0004	0.0015	.	.	.	.	0.0003	0.0026	0	0	0	8.14e-05	0	0	0.0005	0.0016	.	.	.	0.0003	0.0033	0.0002	0	0	0	7.39e-05	0.0002	0	0.0009	0.0033	0
8	52469407	rs777981874	C	G	455.9	PASS	1	318	1	PXDNL	nonsynonymous SNV	COSM6113711	1(lung)	.	.	.	.	.	.	.	.	.	.	.	.	.	.	.	.	.	.	.	.	.	.	.	.	.	.	.	.	.	.	.	.	.	.	.	.
8	54900676	rs200590980	C	G	219.2	PASS	1	1446	1	TCEA1	nonsynonymous SNV	.	.	.	.	.	.	.	0.0004	.	0.0014	.	0.001	.	0.0016	0.0003	0.0013	0	0	0.0023	0	0.001	0.0013	0.0005	0.0018	.	.	0.0016	0.0003	0.0019	0.0081	0	0	0.0018	0.0039	0.0009	0.001	0.0003	0
8	57079094	rs1160345224	G	C	382.2	PASS	1	4197155	1	PLAG1	nonsynonymous SNV	.	.	.	.	.	.	.	.	.	.	.	.	.	.	.	.	.	.	.	.	.	.	.	.	.	.	0	0	0	0	0	0	0	0	0	.	.	.
8	57080027	rs77315395	T	A	854.5	PASS	5	475;621;4164943;4169012;4171586	1,1,1,1,1	PLAG1	nonsynonymous SNV	.	.	.	.	.	.	.	0.0004	.	.	.	0.002	.	0.0015	0.0007	0.0001	0	0.002	0.0023	0	0.0001	0.0008	0.0007	0.0009	.	0.0082	0.0012	0.0005	6.01e-05	0.0001	0	0.0019	0.0021	0.0006	0.0002	0.0016	0.0002	0
8	59727976	rs146676487	G	A	505.3	PASS	5	375;002;4112817;4131213;4189998	1,1,1,1,1	TOX	nonsynonymous SNV	.	.	.	.	.	.	.	0.0004	.	.	.	0.002	.	0.0012	9.62e-05	0.0027	0.0001	0	0.0015	0.0033	0.0004	0.0011	0.0002	0.0015	.	.	0.0014	0.0001	0.0036	0.0017	5.81e-05	0.0002	0.0016	0.0026	0.0005	0.001	0.0006	0.0036
8	59728090	rs138337223	G	A	266.5	PASS	1	4177639	1	TOX	nonsynonymous SNV	.	.	.	.	.	.	.	0.0002	0.0008	.	.	.	.	0.0004	0.0005	8.65e-05	0	0	0.0006	0	6.06e-05	0.0005	0.0009	0.0003	.	.	0.0003	0.0002	0.0002	0	5.81e-05	0	0.0006	0	9.75e-05	0.0003	0.0003	0
8	59728189	rs201823077	G	A	420.5	PASS	1	4121974	1	TOX	nonsynonymous SNV	.	.	.	.	.	.	.	0.0004	.	0.0014	.	0.001	.	0.0004	0	0.0002	0	0	0.0008	0	6.06e-05	0.0002	.	0.0002	.	.	0.0005	0	0.0001	0.0067	0	0	0.0004	0.0007	3.25e-05	0.0002	0.0001	0.0012
8	68930127	rs139905707	A	G	385.7	PASS	1	4131095	1	PREX2	nonsynonymous SNV	.	.	.	.	.	.	.	0.0004	.	.	.	0.001	0.001	0.0004	0.0003	9.14e-05	0	0.0006	0.0007	0	0	0.001	0.0005	0.0013	.	.	0.0004	0.0001	0.0003	0	0	0.0009	0.0006	0.0002	0	0.0005	0.0001	0
8	68956816	rs11784582	G	A	300.8	PASS	2	091;658	1,1	PREX2	nonsynonymous SNV	.	.	.	.	.	.	.	0.0012	.	0.0029	.	0.004	.	0.0016	0.0002	0.0007	0.0001	0.0002	0.0026	0	0.0008	0.0018	0.0005	0.0024	.	.	0.0016	0.0005	0.0005	0.002	5.81e-05	4.49e-05	0.0027	0.0011	0.0011	0.0018	0.0006	0.0012
8	68992692	rs529924687	G	A	340.2	PASS	1	1471	1	PREX2	nonsynonymous SNV	COSM1101284;COSM1101283	1(stomach);1(oesophagus);1(skin);2(large_intestine);1(endometrium)	.	.	.	.	.	0.0002	.	0.0014	.	.	.	8.26e-06	0	8.65e-05	0	0	0	0	0	.	.	.	.	.	2.47e-05	6.56e-05	9.08e-05	0	0	0	1.8e-05	0	0	.	.	.
8	69020561	.	A	G	274.5	PASS	1	842	1	PREX2	nonsynonymous SNV	.	.	.	.	.	.	.	.	.	.	.	.	.	.	.	.	.	.	.	.	.	.	.	.	.	.	.	.	.	.	.	.	.	.	.	.	.	.
8	69033204	rs146939492	G	A	715.4	PASS	3	1323;4175941;4181460	1,1,1	PREX2	nonsynonymous SNV	.	.	.	.	.	.	.	0.001	.	0.0014	.	0.004	.	0.0006	9.65e-05	0.0005	0	0	0.001	0.0011	0.0002	0.0005	0.0009	0.0003	.	.	0.0006	6.54e-05	0.0008	0.0012	0	0	0.0009	0.0011	0.0002	0.0005	0	0
8	69046434	rs183882933	G	A	1144.2	PASS	2	156;376	1,1	PREX2	nonsynonymous SNV	.	.	.	.	.	.	.	0.0002	.	.	.	0.001	.	9.07e-05	0	0	0	0	0.0002	0	0	0.0002	.	0.0003	.	.	0.0001	0	5.96e-05	0	0	0	0.0002	0.0002	0	3.23e-05	0	0
8	71033566	rs61754973	T	C	633.8	PASS	1	176	1	NCOA2	nonsynonymous SNV	.	.	.	.	.	.	.	0.0002	.	.	.	0.001	.	0.0006	0.0002	0.0001	0	0.0002	0.0009	0.0013	0.0002	0.0007	.	0.001	.	.	0.0005	0.0001	5.98e-05	0.0001	0	4.49e-05	0.001	0.0004	0.0002	0.0011	0.0005	0.0012
8	71036267	.	C	T	370.7	PASS	1	55	1	NCOA2	nonsynonymous SNV	COSM1314178	1(urinary_tract)	.	.	.	.	.	.	.	.	.	.	.	.	.	.	.	.	.	.	.	.	.	.	.	.	.	.	.	.	.	.	.	.	.	.	.	.
8	71039122	rs61754972	C	T	1421.5	PASS	1	1533	1	NCOA2	nonsynonymous SNV	.	.	.	.	.	.	.	0.0008	.	.	.	0.003	0.001	0.0011	0.0003	0.0003	0	0.0027	0.0016	0	6.13e-05	0.0013	0.0005	0.0017	.	.	0.001	0.0003	0.0002	0	0	0.0018	0.0017	0.0005	6.5e-05	0.0013	0.0002	0
8	71041031	rs189421236	A	G	230.7	PASS	1	181	1	NCOA2	nonsynonymous SNV	.	.	.	.	.	.	.	0.0004	.	0.0014	.	0.001	.	0.0004	0.0001	0.0008	0	0	0.0005	0.0022	0	0.0007	.	0.001	.	.	0.0004	6.54e-05	0.0002	0	0	0	0.0008	0.0007	0	0.0007	0.0003	0
8	71044134	rs1292841322	G	A	648.5	PASS	1	386	1	NCOA2	nonsynonymous SNV	.	.	.	.	.	.	.	.	.	.	.	.	.	.	.	.	.	.	.	.	.	.	.	.	.	.	0	0	0	0	0	0	0	0	0	.	.	.
8	71126147	.	T	C	498.9	PASS	1	4103593	1	NCOA2	nonsynonymous SNV	.	.	.	.	.	.	.	.	.	.	.	.	.	.	.	.	.	.	.	.	.	.	.	.	.	.	.	.	.	.	.	.	.	.	.	.	.	.
8	87878793	.	C	G	250.9	PASS	1	1418	1	CNBD1	nonsynonymous SNV	.	.	.	.	.	.	.	.	.	.	.	.	.	.	.	.	.	.	.	.	.	.	.	.	.	.	.	.	.	.	.	.	.	.	.	.	.	.
8	88363940	rs200357055	C	A	1262.4	PASS	1	820	1	CNBD1	nonsynonymous SNV	.	.	.	.	.	.	.	0.0004	.	0.0014	.	0.001	.	0.001	0.0003	0	0	0	0.0019	0	0.0002	0.0006	.	0.0009	.	.	0.0005	0.0002	0.0006	0.0029	9.72e-05	0.0003	0.0005	0	0.0001	0.0003	0	0
8	90983460	rs34767364	G	A	1043.4	PASS	5	055;1407;326;393;4122063	1,1,1,1,1	NBN	nonsynonymous SNV	.	.	other|Likely benign|Uncertain significance	Microcephaly\x2c_normal_intelligence_and_immunodeficiency|Hereditary_cancer-predisposing_syndrome|not_specified	RCV000007363.9|RCV000115802.7|RCV000121621.3	MedGen:OMIM:Orphanet:SNOMED_CT|MedGen:SNOMED_CT|MedGen	C0398791:251260:ORPHA647:234638009|C0027672:699346009|CN169374	0.001	.	0.0014	.	0.004	.	0.003	0.0003	0.0014	0	0.0035	0.0047	0	0.0001	0.0025	.	0.0037	.	.	0.0025	0.0003	0.0016	0.0003	0	0.0031	0.0041	0.0026	6.5e-05	0.0021	0.001	0
8	90990521	rs61754966	T	C	900.2	PASS	1	535	1	NBN	nonsynonymous SNV	.	.	Pathogenic|other|Uncertain significance|Uncertain significance|Benign	Aplastic_anemia|Leukemia\x2c_acute_lymphoblastic\x2c_susceptibility_to|Hereditary_cancer-predisposing_syndrome|not_specified|Microcephaly\x2c_normal_intelligence_and_immunodeficiency	RCV000007360.5|RCV000007361.5|RCV000115797.7|RCV000121618.5|RCV000197512.4	MedGen:OMIM:SNOMED_CT|MedGen|MedGen:SNOMED_CT|MedGen|MedGen:OMIM:Orphanet:SNOMED_CT	C0002874:609135:306058006|C1840513|C0027672:699346009|CN169374|C0398791:251260:ORPHA647:234638009	0.0004	.	.	0.001	0.001	.	0.0014	0.0004	0.0003	0.0018	0.002	0.002	0.0022	0	0.0012	0.0005	0.0016	.	0.0082	0.0012	0.0003	0.0002	0.0004	0.0015	0.0013	0.002	0.0005	3.25e-05	0.0039	0.0001	0
8	90993640	rs61753720	C	T	868.4	PASS	7	053;680;761;785;4111337;4139483;4177810	1,1,1,1,1,1,1	NBN	nonsynonymous SNV	.	.	Benign|other|Benign	Hereditary_cancer-predisposing_syndrome|not_specified|Microcephaly\x2c_normal_intelligence_and_immunodeficiency	RCV000115792.6|RCV000121616.4|RCV000123216.6	MedGen:SNOMED_CT|MedGen|MedGen:OMIM:Orphanet:SNOMED_CT	C0027672:699346009|CN169374|C0398791:251260:ORPHA647:234638009	0.0008	.	0.0014	.	0.003	.	0.0019	0.0006	0.0005	0	0.0005	0.003	0	0.0004	0.0022	0.0016	0.0026	.	0.0082	0.0017	0.0006	0.0007	0.004	0	0.0004	0.003	0.0009	0.0004	0.0016	0.001	0
8	93017346	rs200143453	G	A	1635.2	PASS	2	070;1465	1,1	RUNX1T1	stopgain	.	.	.	.	.	.	.	0.0002	0.0008	.	.	.	.	4.23e-05	9.65e-05	0	0	0	6.08e-05	0	0	.	.	.	.	.	2.9e-05	6.58e-05	0	0	0	4.53e-05	4.55e-05	0	0	0.0001	0	0
8	93088195	rs77385137	T	C	1354.2	PASS	1	358	1	RUNX1T1	nonsynonymous SNV	.	.	.	.	.	.	.	0.0002	.	.	.	0.001	.	1.65e-05	0	0	0	0	3.01e-05	0	0	.	.	.	.	.	1.23e-05	0	0	0	0	0	2.7e-05	0	0	.	.	.
8	93088222	rs144423229	C	T	695.9	PASS	2	509;1191	1,1	RUNX1T1	nonsynonymous SNV	.	.	.	.	.	.	.	0.0006	.	0.0029	.	0.001	.	0.0002	0	0.0016	0	0	0.0001	0.0022	0	.	.	.	.	.	0.0003	0	0.002	0	0	0	0.0001	0	0	6.63e-05	0	0.0024
8	93107649	.	A	G	255.3	PASS	1	4108627	1	RUNX1T1	nonsynonymous SNV	.	.	.	.	.	.	.	.	.	.	.	.	.	.	.	.	.	.	.	.	.	.	.	.	.	.	.	.	.	.	.	.	.	.	.	.	.	.
8	95143202	.	G	A	577.1	PASS	1	356	1	CDH17	nonsynonymous SNV	.	.	.	.	.	.	.	.	.	.	.	.	.	.	.	.	.	.	.	.	.	.	.	.	.	.	.	.	.	.	.	.	.	.	.	.	.	.
8	95164124	rs201712089	C	A	603.7	PASS	1	330	1	CDH17	nonsynonymous SNV	.	.	.	.	.	.	.	0.0004	.	0.0014	.	0.001	.	9.06e-05	0	8.64e-05	0	0.0002	0.0001	0	0	0.0002	.	0.0002	.	.	0.0001	0	5.96e-05	0	0	4.49e-05	0.0002	0.0005	0	0.0001	0.0001	0
8	95172234	.	G	C	722	PASS	1	4100314	1	CDH17	nonsynonymous SNV	.	.	.	.	.	.	.	.	.	.	.	.	.	.	.	.	.	.	.	.	.	.	.	.	.	.	.	.	.	.	.	.	.	.	.	.	.	.
8	103289209	.	G	A	359.2	PASS	2	1162;1426	1,1	UBR5	nonsynonymous SNV	.	.	.	.	.	.	.	.	.	.	.	.	.	.	.	.	.	.	.	.	.	.	.	.	.	.	.	.	.	.	.	.	.	.	.	.	.	.
8	103310692	.	T	C	184.7	PASS	1	40	1	UBR5	nonsynonymous SNV	.	.	.	.	.	.	.	.	.	.	.	.	.	.	.	.	.	.	.	.	.	.	.	.	.	.	.	.	.	.	.	.	.	.	.	.	.	.
8	103316307	.	C	T	424.5	PASS	1	4175837	1	UBR5	nonsynonymous SNV	.	.	.	.	.	.	.	.	.	.	.	.	.	.	.	.	.	.	.	.	.	.	.	.	.	.	.	.	.	.	.	.	.	.	.	.	.	.
8	103340036	rs200599625	C	T	606.5	PASS	2	1076;318	1,1	UBR5	nonsynonymous SNV	.	.	.	.	.	.	.	0.0002	.	.	0.001	.	.	7.42e-05	0	8.65e-05	0.0001	0	0.0001	0	0	0.0001	.	0.0001	.	.	6.91e-05	0	0.0001	0	5.81e-05	0	8.96e-05	0.0002	3.25e-05	3.23e-05	0	0
8	108970478	rs147756016	T	A	1241.4	PASS	4	1403;475;4128970;4160468	1,1,1,1	RSPO2	nonsynonymous SNV	.	.	.	.	.	.	.	0.0006	.	0.0014	.	0.002	.	0.0015	0.0007	0	0	0.0008	0.0025	0	6.07e-05	0.0015	0.0002	0.0021	.	.	0.0013	0.0003	2.99e-05	0	0	0.0012	0.0026	0.0004	6.51e-05	0.0009	0.0003	0
8	108972931	rs142649056	G	A	652.1	PASS	1	18	1	RSPO2	nonsynonymous SNV	.	.	.	.	.	.	.	0.001	.	.	.	0.001	0.0041	0.0006	0.0002	0.0005	0	0	0.0006	0.0022	0.0015	0.0004	0.0002	0.0005	.	.	0.0006	6.54e-05	0.0007	0	0	0	0.0006	0.0007	0.0013	0.0002	0.0001	0.0012
8	109001337	.	G	A	258.1	PASS	1	523	1	RSPO2	nonsynonymous SNV	.	.	.	.	.	.	.	.	.	.	.	.	.	.	.	.	.	.	.	.	.	.	.	.	.	.	.	.	.	.	.	.	.	.	.	.	.	.
8	113256661	.	G	C	336.7	PASS	1	4166151	1	CSMD3	nonsynonymous SNV	.	.	.	.	.	.	.	.	.	.	.	.	.	.	.	.	.	.	.	.	.	.	.	.	.	.	.	.	.	.	.	.	.	.	.	.	.	.
8	113364697	rs139786530	T	C	1369.1	PASS	3	566;841;4111337	1,1,1	CSMD3	nonsynonymous SNV	COSM6111842;COSM6111843	1(lung)	.	.	.	.	.	0.0006	.	0.0014	.	0.002	.	0.001	0.0003	0.0003	0	0	0.0017	0	6.06e-05	0.0014	0.0005	0.0019	.	0.025	0.0009	0.0002	0.0004	0.0003	0	0.0002	0.0016	0.002	6.5e-05	0.0009	0.0005	0
8	113402924	.	T	G	394.6	PASS	1	1262	1	CSMD3	nonsynonymous SNV	.	.	.	.	.	.	.	.	.	.	.	.	.	.	.	.	.	.	.	.	.	.	.	.	.	.	.	.	.	.	.	.	.	.	.	.	.	.
8	113504810	rs61754527	G	A	1918.6	PASS	13	1166;1237;264;297;307;344;593;733;826;122;294;4121621;4178345	1,1,1,1,1,1,1,1,1,1,1,1,1	CSMD3	nonsynonymous SNV	.	.	.	.	.	.	.	0.0014	.	0.0029	.	0.004	0.001	0.0031	0.0007	0.0039	0	0.0023	0.0039	0.0022	0.0028	0.0024	0.0007	0.0033	0.011	0.016	0.0029	0.0005	0.0035	0.0024	0	0.0024	0.0038	0.0042	0.0025	0.002	0.001	0
8	113697919	.	A	T	1055.6	PASS	1	30	1	CSMD3	nonsynonymous SNV	.	.	.	.	.	.	.	.	.	.	.	.	.	.	.	.	.	.	.	.	.	.	.	.	.	.	.	.	.	.	.	.	.	.	.	.	.	.
8	113988123	.	G	T	256.4	PASS	1	4122063	1	CSMD3	nonsynonymous SNV	.	.	.	.	.	.	.	.	.	.	.	.	.	.	.	.	.	.	.	.	.	.	.	.	.	.	.	.	.	.	.	.	.	.	.	.	.	.
8	114111109	.	C	A	253.8	PASS	1	4177434	1	CSMD3	nonsynonymous SNV	.	.	.	.	.	.	.	.	.	.	.	.	.	.	.	.	.	.	.	.	.	.	.	.	.	.	.	.	.	.	.	.	.	.	.	.	.	.
8	117864868	.	T	G	281.3	PASS	1	1432	1	RAD21	nonsynonymous SNV	.	.	.	.	.	.	.	.	.	.	.	.	.	.	.	.	.	.	.	.	.	.	.	.	.	.	.	.	.	.	.	.	.	.	.	.	.	.
8	117866558	.	AC	A	330.6	PASS	1	1380	1	RAD21	frameshift deletion
8	118830766	.	T	C	439.2	PASS	1	820	1	EXT1	nonsynonymous SNV	.	.	.	.	.	.	.	.	.	.	.	.	.	.	.	.	.	.	.	.	.	.	.	.	.	.	.	.	.	.	.	.	.	.	.	.	.	.
8	118831914	.	C	G	325.1	PASS	1	1195	1	EXT1	splice_donor
8	119122484	.	C	G	255	PASS	1	1101	1	EXT1	nonsynonymous SNV	.	.	.	.	.	.	.	.	.	.	.	.	.	.	.	.	.	.	.	.	.	.	.	.	.	.	.	.	.	.	.	.	.	.	.	.	.	.
8	119123164	rs199862937	C	T	235.9	PASS	1	1564	1	EXT1	nonsynonymous SNV	.	.	not provided	not_specified	RCV000120870.1	MedGen	CN169374	0.0002	.	0.0014	.	.	.	9.98e-05	0	0.0002	0	0	7.56e-05	0	0.0003	.	.	.	.	.	0.0001	6.55e-05	0.0001	0	0	0	0.0001	0.0002	0.0003	3.23e-05	0	0
8	128750527	rs146505192	T	C	1378.5	PASS	3	385;283;4124188	1,1,1	MYC	nonsynonymous SNV	COSM3358205;COSM3358206	2(haematopoietic_and_lymphoid_tissue)	.	.	.	.	.	0.0008	0.0008	0.0029	.	0.001	.	0.0024	0.0002	0.0017	0	0	0.0035	0.0012	0.0017	0.0023	0.0002	0.0034	0.011	.	0.0028	0.0003	0.0021	0.0365	0	0.0002	0.0015	0.0059	0.0016	0.0013	0.0002	0.0024
8	128750972	.	C	T	309.5	PASS	1	4107559	1	MYC	nonsynonymous SNV	.	.	.	.	.	.	.	.	.	.	.	.	.	.	.	.	.	.	.	.	.	.	.	.	.	.	.	.	.	.	.	.	.	.	.	.	.	.
8	128750986	rs4645960	G	T	3894.2	PASS	1	70	1	MYC	nonsynonymous SNV	.	.	.	.	.	.	.	.	.	.	.	.	.	.	.	.	.	.	.	.	.	.	.	.	.	.	.	.	.	.	.	.	.	.	.	.	.	.
8	135490774	rs201818197	A	G	1655.7	PASS	2	1271;4110498	1,1	ZFAT	nonsynonymous SNV	.	.	.	.	.	.	.	0.0004	.	.	0.001	0.001	.	0.0015	0.0007	0.0012	0	0	0.0027	0	0	0.0011	.	0.0017	.	.	0.0005	0.0003	0.0003	0.0003	0	0	0.001	0.0004	0	0.0006	0.0001	0.0012
8	135615163	.	G	T	919.6	PASS	1	689	1	ZFAT	nonsynonymous SNV	.	.	.	.	.	.	.	.	.	.	.	.	.	.	.	.	.	.	.	.	.	.	.	.	.	.	.	.	.	.	.	.	.	.	.	.	.	.
8	135622851	rs75596750	G	A	858.7	PASS	3	821;4135099;4176046	1,1,1	ZFAT	nonsynonymous SNV	.	.	.	.	.	.	.	0.0004	.	.	.	0.002	.	0.0005	0.0002	8.64e-05	0	0.0002	0.0008	0	0	0.0007	0.0003	0.0008	.	.	0.0005	0.0002	0.0001	0	5.8e-05	4.48e-05	0.001	0.0005	0	0.0007	0.0003	0
8	139190806	.	T	G	523.9	PASS	1	575	1	FAM135B	nonsynonymous SNV	.	.	.	.	.	.	.	.	.	.	.	.	.	.	.	.	.	.	.	.	.	.	.	.	.	.	.	.	.	.	.	.	.	.	.	.	.	.
8	144941229	rs144123426	A	T	642.3	PASS	4	4113191;4166940;4167381;4194891	1,1,1,1	EPPK1	nonsynonymous SNV	.	.	.	.	.	.	.	0.001	.	0.0029	.	0.003	.	0.0024	0.0007	0.0005	0	0.0038	0.0037	0	0.0005	0.0027	.	0.0041	.	.	0.0023	0.0005	0.0007	0	0	0.0036	0.0038	0.0022	0.0004	0.0021	0.0007	0
8	144941565	.	C	T	408.1	PASS	1	661	1	EPPK1	nonsynonymous SNV	.	.	.	.	.	.	.	.	.	.	.	.	.	.	.	.	.	.	.	.	.	.	.	.	.	.	.	.	.	.	.	.	.	.	.	.	.	.
8	144942135	.	C	T	400.9	PASS	1	4151028	1	EPPK1	nonsynonymous SNV	.	.	.	.	.	.	.	.	.	.	.	.	.	.	.	.	.	.	.	.	.	.	.	.	.	.	.	.	.	.	.	.	.	.	.	.	.	.
8	144942209	.	G	C	443.4	PASS	1	4167381	1	EPPK1	nonsynonymous SNV	.	.	.	.	.	.	.	.	.	.	.	.	.	.	.	.	.	.	.	.	.	.	.	.	.	.	.	.	.	.	.	.	.	.	.	.	.	.
8	144942387	rs199598193	G	A	753.6	PASS	3	017;811;826	1,1,1	EPPK1	nonsynonymous SNV	.	.	.	.	.	.	.	0.001	.	.	0.002	0.003	.	0.0019	0.0002	0.0004	0.0002	0.0006	0.003	0.0023	0.0008	0.0023	0.0005	0.0031	.	.	0.0019	0.0003	0.0008	0.0008	0.0002	0.0005	0.0034	0.0026	0.0008	0.0019	0.0005	0.0024
8	144942482	rs111830312	C	T	253.7	PASS	1	1431	1	EPPK1	nonsynonymous SNV	.	.	.	.	.	.	.	0.0002	.	.	.	0.001	.	2.51e-05	0	0	0	0	4.55e-05	0	0	.	.	.	.	.	2.85e-05	0	5.96e-05	0	0	0	4.49e-05	0	0	3.23e-05	0	0
8	144942519	rs545933698	C	T	1948.4	PASS	1	149	1	EPPK1	nonsynonymous SNV	.	.	.	.	.	.	.	0.0002	.	.	.	.	0.001	6.69e-05	0	0	0.0002	0	6.08e-05	0	0.0001	.	.	.	.	.	4.88e-05	0	0	0	0.0003	0	3.59e-05	0	6.5e-05	.	.	.
8	144942975	rs201982226	G	A	147.1	PASS	1	1317	1	EPPK1	nonsynonymous SNV	.	.	.	.	.	.	.	0.0004	.	0.0014	.	0.001	.	0.0002	0	0.0009	0	0	0.0001	0	0	.	.	.	.	.	0.0002	6.97e-05	0.0006	0	0	0	0.0001	0.0004	3.31e-05	3.24e-05	0	0
8	144943446	rs199499630	C	T	502.5	PASS	1	862	1	EPPK1	nonsynonymous SNV	.	.	.	.	.	.	.	0.0004	0.0008	.	.	0.001	.	0.0002	0.0001	0.0002	0.0001	0	0.0002	0	0	0.0002	.	0.0004	.	.	0.0002	0	0.0003	0	5.88e-05	0	0.0003	0.0004	0	9.71e-05	0	0
8	144946484	rs144289918	C	A	557.1	PASS	3	296;664;4158268	1,1,1	EPPK1	nonsynonymous SNV	.	.	.	.	.	.	.	0.0004	.	0.0014	.	0.001	.	0.0007	0	0.002	0	0.0002	0.0008	0.0024	6.98e-05	0.0007	0.0002	0.001	.	.	0.0007	6.77e-05	0.0012	0.0007	0	0.0002	0.0009	0.0017	0.0001	0.0006	0.0002	0.0024
8	144946771	.	C	G	153	PASS	1	297	1	EPPK1	nonsynonymous SNV	.	.	.	.	.	.	.	.	.	.	.	.	.	.	.	.	.	.	.	.	.	.	.	.	.	.	.	.	.	.	.	.	.	.	.	.	.	.
8	144947118	.	C	T	184.4	PASS	1	1464	1	EPPK1	nonsynonymous SNV	.	.	.	.	.	.	.	.	.	.	.	.	.	.	.	.	.	.	.	.	.	.	.	.	.	.	.	.	.	.	.	.	.	.	.	.	.	.
8	144947228	rs200139141	A	T	166.9	PASS	1	4135278	1	EPPK1	nonsynonymous SNV	.	.	.	.	.	.	.	0.0008	.	0.0014	.	0.003	.	0.0002	0	9.85e-05	0	0.0002	0.0002	0.0016	0	0.0003	.	0.0005	.	.	0.0001	0	0.0001	0	0	6.29e-05	0.0002	0.0002	0	3.24e-05	0	0.0012
8	145737123	rs35346077	G	A	528.8	PASS	2	018;4128435	1,1	RECQL4	nonsynonymous SNV	COSM3698976	1(large_intestine)	not provided|Benign	not_specified|Baller-Gerold_syndrome	RCV000121954.1|RCV000232588.2	MedGen|MedGen:OMIM:Orphanet:SNOMED_CT	CN169374|C0265308:218600:ORPHA1225:77608001	0.0008	.	.	.	0.002	0.002	0.0015	0.0004	0.0005	0	0	0.0018	0	0.0033	0.0011	0.0002	0.0015	.	.	0.0014	0.0003	0.0004	0	0	4.49e-05	0.0022	0.0011	0.0024	0.0012	0.0005	0
8	145737811	.	G	C	191.6	PASS	1	190	1	RECQL4	nonsynonymous SNV	.	.	.	.	.	.	.	.	.	.	.	.	.	.	.	.	.	.	.	.	.	.	.	.	.	.	.	.	.	.	.	.	.	.	.	.	.	.
8	145738323	rs1406641581	G	A	598.1	PASS	1	150	1	RECQL4	stopgain	.	.	.	.	.	.	.	.	.	.	.	.	.	.	.	.	.	.	.	.	.	.	.	.	.	.	0	0	0	0	0	0	0	0	0	.	.	.
8	145741905	.	C	A	1024	PASS	1	339	1	RECQL4	nonsynonymous SNV	.	.	.	.	.	.	.	.	.	.	.	.	.	.	.	.	.	.	.	.	.	.	.	.	.	.	.	.	.	.	.	.	.	.	.	.	.	.
9	289557	rs150742426	G	A	486	PASS	2	1101;4166151	1,1	DOCK8	nonsynonymous SNV	.	.	Uncertain significance	Hyper-IgE_syndrome	RCV000328185.1	MedGen:Orphanet	CN204280:ORPHA331223	0.0004	.	.	.	0.002	.	0.0021	0.0005	0.0004	0	0.0008	0.0035	0	0.0005	0.0024	0.0009	0.0031	.	.	0.002	0.0004	0.0005	0.0004	0	0.0013	0.0037	0.0009	0.0006	0.0022	0.0011	0
9	328041	rs778114411	G	A	635.4	PASS	1	815	1	DOCK8	nonsynonymous SNV	.	.	.	.	.	.	.	.	.	.	.	.	.	.	.	.	.	.	.	.	.	.	.	.	.	.	.	.	.	.	.	.	.	.	.	.	.	.
9	328077	rs191413750	G	A	1140.2	PASS	5	023;082;352;442;684	1,1,1,1,1	DOCK8	nonsynonymous SNV	.	.	.	.	.	.	.	0.0006	.	0.0029	0.001	.	.	7.42e-05	9.61e-05	0.0003	0	0	5.99e-05	0	0	.	.	.	.	.	0.0001	6.54e-05	0.0006	0	5.81e-05	0	6.27e-05	0.0002	0	6.46e-05	0	0.0012
9	399200	.	C	G	307.1	PASS	1	1343	1	DOCK8	nonsynonymous SNV	COSM2152092;COSM2152091	2(central_nervous_system)	.	.	.	.	.	.	.	.	.	.	.	.	.	.	.	.	.	.	.	.	.	.	.	.	.	.	.	.	.	.	.	.	.	.	.	.
9	406975	.	A	G	963	PASS	1	878	1	DOCK8	nonsynonymous SNV	.	.	.	.	.	.	.	.	.	.	.	.	.	.	.	.	.	.	.	.	.	.	.	.	.	.	.	.	.	.	.	.	.	.	.	.	.	.
9	418135	rs772645098	C	G	378.6	PASS	1	4176133	1	DOCK8	nonsynonymous SNV	.	.	.	.	.	.	.	.	.	.	.	.	.	.	.	.	.	.	.	.	.	.	.	.	.	.	.	.	.	.	.	.	.	.	.	.	.	.
9	432197	.	T	A	192.6	PASS	1	182	1	DOCK8	nonsynonymous SNV	.	.	.	.	.	.	.	.	.	.	.	.	.	.	.	.	.	.	.	.	.	.	.	.	.	.	.	.	.	.	.	.	.	.	.	.	.	.
9	2056721	.	C	T	557.5	PASS	1	383	1	SMARCA2	nonsynonymous SNV	COSM5569924;COSM5569923	1(prostate)	.	.	.	.	.	.	.	.	.	.	.	.	.	.	.	.	.	.	.	.	.	.	.	.	.	.	.	.	.	.	.	.	.	.	.	.
9	2161782	.	G	A	671.1	PASS	1	4121621	1	SMARCA2	nonsynonymous SNV	.	.	.	.	.	.	.	.	.	.	.	.	.	.	.	.	.	.	.	.	.	.	.	.	.	.	.	.	.	.	.	.	.	.	.	.	.	.
9	2191312	.	A	C	524.1	PASS	1	170	1	SMARCA2	nonsynonymous SNV	.	.	.	.	.	.	.	.	.	.	.	.	.	.	.	.	.	.	.	.	.	.	.	.	.	.	.	.	.	.	.	.	.	.	.	.	.	.
9	2191388	rs61736899	G	A	536.8	PASS	3	4119702;4130051;4164943	1,1,1	SMARCA2	nonsynonymous SNV	.	.	Likely benign	Nicolaides-Baraitser_syndrome	RCV000358448.1	MedGen:OMIM:Orphanet:SNOMED_CT	C1303073:601358:ORPHA3051:401046009	0.0002	.	.	.	0.001	.	0.0008	0.0004	0.0008	0	0.0006	0.0011	0	0.0002	0.0012	0.0009	0.0014	.	.	0.0009	0.0004	0.0007	0	0	0.0008	0.0015	0.0009	0.0002	0.0008	0.0005	0
9	5126715	rs142269166	A	G	629	PASS	11	1062;152;159;760;802;125;1423;179;4111337;4124432;4171586	1,1,1,1,1,1,1,1,1,1,1	JAK2	nonsynonymous SNV	COSM33708	2(haematopoietic_and_lymphoid_tissue)	not provided	not_specified	RCV000121246.1	MedGen	CN169374	0.0006	.	0.0014	.	0.002	.	0.0019	0.0006	0.0019	0	0.0005	0.0029	0.0034	0.0006	0.0025	0.0002	0.0036	.	.	0.002	0.0007	0.0031	0	0	0.0005	0.0031	0.0027	0.0004	0.0018	0.0007	0.0048
9	8484269	.	C	A	579.3	PASS	1	342	1	PTPRD	nonsynonymous SNV	COSM754049;COSM1151349;COSM4861583;COSM1151348;COSM1648174	1(lung)	.	.	.	.	.	.	.	.	.	.	.	.	.	.	.	.	.	.	.	.	.	.	.	.	.	.	.	.	.	.	.	.	.	.	.	.
9	8486232	rs142397137	C	G	799.8	PASS	1	1465	1	PTPRD	nonsynonymous SNV	.	.	.	.	.	.	.	0.0004	.	0.0029	.	.	.	5.77e-05	0	0.0002	0	0	7.49e-05	0	0	.	.	.	.	.	5.69e-05	0	8.93e-05	0	0	0	9.85e-05	0	0	.	.	.
9	8486247	rs139171396	C	T	602.2	PASS	1	4123945	1	PTPRD	nonsynonymous SNV	.	.	.	.	.	.	.	0.001	.	.	0.001	.	0.0041	0.0006	0.0003	8.64e-05	0.0001	0	0.0001	0.0011	0.0037	0.0004	0.0005	0.0003	.	.	0.0006	0.0002	2.98e-05	0	0	4.49e-05	0.0002	0.0004	0.004	3.23e-05	0.0001	0
9	8499805	rs150444130	C	A	833.2	PASS	7	041;1066;1178;1345;1471;882;177	1,1,1,1,1,1,1	PTPRD	nonsynonymous SNV	.	.	.	.	.	.	.	0.0004	.	0.0029	.	.	.	0.0009	0.0003	0.0017	0	0.0002	0.0012	0	0	0.0018	0.0011	0.0022	.	.	0.001	0.0003	0.002	0	0	0.0004	0.0016	0.0006	0	0.0016	0.0005	0.0024
9	8500886	.	G	A	328.6	PASS	1	372	1	PTPRD	nonsynonymous SNV	COSM3658990;COSM3658991	2(NS);2(skin)	.	.	.	.	.	.	.	.	.	.	.	.	.	.	.	.	.	.	.	.	.	.	.	.	.	.	.	.	.	.	.	.	.	.	.	.
9	15478478	.	T	C	401.8	PASS	1	1564	1	PSIP1	nonsynonymous SNV	.	.	.	.	.	.	.	.	.	.	.	.	.	.	.	.	.	.	.	.	.	.	.	.	.	.	.	.	.	.	.	.	.	.	.	.	.	.
9	20363474	rs149399304	C	T	179.3	PASS	1	176	1	MLLT3	nonsynonymous SNV	.	.	.	.	.	.	.	0.0002	.	.	.	0.001	.	0.0002	9.61e-05	0	0	0	0.0003	0	0	0.0005	0.0002	0.0006	.	.	0.0002	6.55e-05	5.98e-05	0	0	4.5e-05	0.0004	0	0	0.0003	0	0
9	21854663	rs541314246	C	T	1375.1	PASS	1	621	1	MTAP	nonsynonymous SNV	.	.	.	.	.	.	.	0.0004	.	.	.	0.002	.	5.18e-05	0	0	0	0	7.67e-05	0	7.7e-05	.	.	.	0.011	.	4.54e-05	0	0.0001	0	0	0	5.45e-05	0	3.3e-05	3.23e-05	0.0001	0
9	80537169	.	T	C	628.4	PASS	1	274	1	GNAQ	nonsynonymous SNV	.	.	.	.	.	.	.	.	.	.	.	.	.	.	.	.	.	.	.	.	.	.	.	.	.	.	.	.	.	.	.	.	.	.	.	.	.	.
9	93641206	rs886319107	G	C	719.7	PASS	1	289	1	SYK	nonsynonymous SNV	.	.	.	.	.	.	.	.	.	.	.	.	.	.	.	.	.	.	.	.	.	.	.	.	.	.	.	.	.	.	.	.	.	.	.	.	.	.
9	93650837	.	G	A	469.9	PASS	1	4166940	1	SYK	nonsynonymous SNV	.	.	.	.	.	.	.	.	.	.	.	.	.	.	.	.	.	.	.	.	.	.	.	.	.	.	.	.	.	.	.	.	.	.	.	.	.	.
9	95997245	rs1444551716	T	C	207.9	PASS	1	1432	1	WNK2	nonsynonymous SNV	.	.	.	.	.	.	.	.	.	.	.	.	.	.	.	.	.	.	.	.	.	.	.	.	.	.	.	.	.	.	.	.	.	.	.	.	.	.
9	98212185	rs113663584	C	T	387.5	PASS	3	794;801;4167381	1,1,1	PTCH1	nonsynonymous SNV	COSM17477	1(skin)	Uncertain significance|other|Likely benign	not_provided|not_specified|Gorlin_syndrome	RCV000034572.1|RCV000121892.3|RCV000123025.6	MedGen|MedGen|MedGen:OMIM:Orphanet:SNOMED_CT	CN221809|CN169374|C0004779:109400:ORPHA377:69408002	0.0004	.	0.0014	.	0.001	.	0.0006	9.7e-05	0.0004	0	0.0005	0.0009	0	0	0.0006	0.0005	0.0007	.	.	0.0005	0	0.0005	0	0	0.0002	0.0009	0.0005	0	0.0004	0	0.0012
9	98231239	rs570441437	G	A	280.1	PASS	1	4175837	1	PTCH1	nonsynonymous SNV	COSM327220;COSM327219;COSM327221;COSM327222	1(haematopoietic_and_lymphoid_tissue);1(large_intestine)	Uncertain significance	Gorlin_syndrome	RCV000234364.2	MedGen:OMIM:Orphanet:SNOMED_CT	C0004779:109400:ORPHA377:69408002	0.0004	0.0015	.	.	.	.	7.41e-05	0.0004	0	0.0002	0.0002	0	0	0.0001	.	.	.	.	.	7.31e-05	0.0007	2.98e-05	0	5.8e-05	0	0	0	0.0002	6.46e-05	0.0002	0
9	98240378	rs142274954	C	T	268.9	PASS	2	1459;175	1,1	PTCH1	nonsynonymous SNV	.	.	Likely benign|Benign|Uncertain significance|Likely benign	not_specified|Gorlin_syndrome|Hirschsprung_disease_1|Anophthalmia_-_microphthalmia	RCV000121906.2|RCV000122998.6|RCV000201284.1|RCV000207385.1	MedGen|MedGen:OMIM:Orphanet:SNOMED_CT|MedGen:OMIM|MedGen	CN169374|C0004779:109400:ORPHA377:69408002|C2931876:142623|CN235161	0.0002	.	.	.	0.001	.	0.0007	9.61e-05	0.001	0	0.0003	0.0011	0.0022	0	0.0003	.	0.0005	.	.	0.0007	0.0003	0.0012	0.0002	0	0.0005	0.001	0.0009	0	0.0005	0.0002	0.0024
9	98268854	.	G	C	113.5	PASS	1	473	1	PTCH1	nonsynonymous SNV	.	.	.	.	.	.	.	.	.	.	.	.	.	.	.	.	.	.	.	.	.	.	.	.	.	.	.	.	.	.	.	.	.	.	.	.	.	.
9	100451852	rs574811302	A	G	409.7	PASS	1	4123945	1	XPA	nonsynonymous SNV	.	.	.	.	.	.	.	0.0002	0.0008	.	.	.	.	3.41e-05	0.0004	0	0	0	0	0	0	.	.	.	.	.	2.85e-05	0.0004	2.98e-05	0	0	0	0	0	0	0.0001	0.0003	0
9	102590524	rs573092297	GCAA	G	196.6	PASS	2	1344;815	1,1	NR4A3	nonframeshift deletion	.	.	.	.	.	.	.	0.0006	.	0.0014	.	0.002	.	0.0012	0.0003	0.0003	0	0.002	0.002	0	0	0.0022	0.0009	0.0029	.	.	0.0013	0.0003	0.0003	0.0002	0	0.0034	0.0019	0.0016	3.25e-05	0.0027	0.0003	0
9	102609807	.	G	T	521.1	PASS	1	17	1	NR4A3	nonsynonymous SNV	.	.	.	.	.	.	.	.	.	.	.	.	.	.	.	.	.	.	.	.	.	.	.	.	.	.	.	.	.	.	.	.	.	.	.	.	.	.
9	102626092	.	C	A	165.8	PASS	1	172	1	NR4A3	nonsynonymous SNV	.	.	.	.	.	.	.	.	.	.	.	.	.	.	.	.	.	.	.	.	.	.	.	.	.	.	.	.	.	.	.	.	.	.	.	.	.	.
9	110249605	rs914464265	T	C	138.9	PASS	1	1413	1	KLF4	nonsynonymous SNV	.	.	.	.	.	.	.	.	.	.	.	.	.	.	.	.	.	.	.	.	.	.	.	.	.	.	.	.	.	.	.	.	.	.	.	.	.	.
9	110249659	.	C	A	191.6	PASS	1	1430	1	KLF4	nonsynonymous SNV	.	.	.	.	.	.	.	.	.	.	.	.	.	.	.	.	.	.	.	.	.	.	.	.	.	.	.	.	.	.	.	.	.	.	.	.	.	.
9	110249816	rs139237114	G	A	184.6	PASS	1	4121263	1	KLF4	nonsynonymous SNV	.	.	.	.	.	.	.	0.0016	0.0008	.	.	0.004	0.0031	0.0032	0.002	0.0014	0	0.0047	0.0041	0	0.0023	0.0035	0.0021	0.0042	.	0.033	0.0026	0.0011	0.0015	0.0011	0	0.0033	0.0038	0.0025	0.0022	0.0031	0.0005	0
9	117810706	rs145720474	G	A	200.7	PASS	1	294	1	TNC	nonsynonymous SNV	.	.	.	.	.	.	.	.	.	.	.	.	.	8.26e-05	9.62e-05	8.73e-05	0.0003	0	7.51e-05	0	0	0.0003	0.0002	0.0003	.	.	8.13e-05	6.54e-05	5.97e-05	0	0.0004	0	8.97e-05	0	0	3.23e-05	0	0
9	117819452	.	A	G	359.5	PASS	1	4175941	1	TNC	nonsynonymous SNV	.	.	.	.	.	.	.	.	.	.	.	.	.	.	.	.	.	.	.	.	.	.	.	.	.	.	.	.	.	.	.	.	.	.	.	.	.	.
9	117819629	.	G	A	3344.4	PASS	1	777	1	TNC	nonsynonymous SNV	.	.	.	.	.	.	.	.	.	.	.	.	.	.	.	.	.	.	.	.	.	.	.	.	.	.	.	.	.	.	.	.	.	.	.	.	.	.
9	117826953	.	G	GT	104.2	PASS	1	4178310	1	TNC	frameshift insertion
9	117835900	rs139280264	G	A	656.4	PASS	4	045;753;776;753	1,1,1,1	TNC	nonsynonymous SNV	.	.	.	.	.	.	.	0.0002	.	.	.	0.001	.	0.0009	0.0002	0.0005	0.0006	0.0003	0.0012	0.0011	0.0002	0.0015	0.0002	0.0022	.	.	0.0009	0.0001	0.0005	0	0.0004	0.0005	0.0015	0.0007	0.0003	0.001	0.0005	0
9	117840315	rs200401362	C	G	334.9	PASS	1	4120157	1	TNC	nonsynonymous SNV	.	.	.	.	.	.	.	0.0002	.	.	0.001	.	.	8.24e-06	0	0	0.0001	0	0	0	0	.	.	.	.	.	1.62e-05	0	0	0	5.8e-05	0	2.69e-05	0	0	.	.	.
9	117846676	rs55643605	C	T	374.4	PASS	1	1346	1	TNC	nonsynonymous SNV	.	.	.	.	.	.	.	0.0006	0.0008	.	.	0.001	0.001	0.0009	0.0003	0.0005	0.0001	0.0012	0.0014	0.0022	0.0002	0.001	0.0002	0.0014	.	.	0.0011	0.0003	0.0008	0.006	5.8e-05	0.001	0.0012	0.0007	0.0003	0.0005	0.0001	0.0024
9	117848470	rs189249722	C	T	717.6	PASS	1	770	1	TNC	nonsynonymous SNV	.	.	.	.	.	.	.	0.0002	.	.	.	0.001	.	0.0001	9.68e-05	0	0.0005	0	0.0001	0	0	0.0002	0.0002	0.0001	.	.	8.55e-05	0.0001	8.94e-05	0	0.0003	0	8.09e-05	0.0002	0	0.0001	0.0001	0
9	117848751	rs1373637122	T	A	388.4	PASS	1	4128849	1	TNC	nonsynonymous SNV	.	.	.	.	.	.	.	.	.	.	.	.	.	.	.	.	.	.	.	.	.	.	.	.	.	.	.	.	.	.	.	.	.	.	.	.	.	.
9	117849499	rs117058692	C	G	653.1	PASS	1	584	1	TNC	nonsynonymous SNV	.	.	.	.	.	.	.	0.0008	.	.	.	0.002	0.002	0.0008	9.68e-05	0.0002	0	0.0003	0.0012	0.0011	0.0003	0.0009	0.0002	0.0013	.	0.0082	0.0007	0.0002	0.0001	0	0	0.0003	0.0014	0	0.0002	0.0008	0.0005	0
9	117852975	rs151119387	C	T	373	PASS	1	55	1	TNC	nonsynonymous SNV	.	.	.	.	.	.	.	0.0002	.	.	.	0.001	.	0.0002	9.76e-05	8.64e-05	0	0.0002	0.0004	0	0	0.0003	0.0002	0.0003	.	.	0.0002	6.54e-05	2.98e-05	0.0009	0	4.49e-05	0.0004	0	0	0.0004	0	0
9	123858819	.	T	G	1755.8	PASS	1	664	1	CNTRL	nonsynonymous SNV	.	.	.	.	.	.	.	.	.	.	.	.	.	.	.	.	.	.	.	.	.	.	.	.	.	.	.	.	.	.	.	.	.	.	.	.	.	.
9	123880790	rs144178223	A	T	2300.3	PASS	4	287;387;859;1431	1,1,1,1	CNTRL	nonsynonymous SNV	.	.	.	.	.	.	.	0.0008	.	0.0014	.	0.003	.	0.0013	9.63e-05	0.0037	0	0	0.0016	0.0011	0	0.0016	0.0002	0.0023	.	0.0082	0.0014	0.0004	0.0024	0	0	4.51e-05	0.0021	0.0034	0	0.0013	0.0005	0
9	123914959	.	G	T	523.5	PASS	1	4183924	1	CNTRL	nonsynonymous SNV	.	.	.	.	.	.	.	.	.	.	.	.	.	.	.	.	.	.	.	.	.	.	.	.	.	.	.	.	.	.	.	.	.	.	.	.	.	.
9	123917145	rs144738756	G	C	2728.4	PASS	5	287;307;387;859;1431	1,1,1,1,1	CNTRL	nonsynonymous SNV	.	.	.	.	.	.	.	0.0008	.	0.0014	.	0.003	.	0.0013	9.61e-05	0.0037	0	0	0.0016	0.0011	0	0.0017	0.0002	0.0024	.	0.0082	0.0014	0.0004	0.0023	0	0	4.48e-05	0.0021	0.0033	0	0.0013	0.0005	0
9	123920272	.	T	C	1173.2	PASS	1	815	1	CNTRL	nonsynonymous SNV	.	.	.	.	.	.	.	.	.	.	.	.	.	.	.	.	.	.	.	.	.	.	.	.	.	.	.	.	.	.	.	.	.	.	.	.	.	.
9	123924546	rs140745627	A	G	455.9	PASS	1	160	1	CNTRL	nonsynonymous SNV	.	.	.	.	.	.	.	0.0004	.	.	.	0.002	.	0.0002	0	0.0009	0	0.0002	0.0002	0	0	0.0002	.	0.0002	.	.	0.0002	0	0.0005	0	0	4.49e-05	0.0002	0.0011	0	0.0002	0	0
9	123937353	rs557741511	C	G	1330.7	PASS	2	1386;830	1,1	CNTRL	nonsynonymous SNV	.	.	.	.	.	.	.	0.0002	.	.	.	0.001	.	3.31e-05	0	0.0002	0	0	3.01e-05	0	0	.	.	.	.	.	3.26e-05	0	5.96e-05	0.0001	0	0	4.49e-05	0	0	.	.	.
9	133738340	rs34549764	A	G	611.7	PASS	4	060;165;4120193;4156551	1,1,1,1	ABL1	nonsynonymous SNV	COSM6005485	2(NS)	not provided	not_specified	RCV000119954.1	MedGen	CN169374	0.001	.	0.0029	.	0.003	.	0.0028	0.0002	0.0013	0	0.0023	0.0045	0.0022	0.0002	0.0024	0.0002	0.0035	.	.	0.0026	0.0003	0.0013	0.0004	0	0.0031	0.0044	0.0036	0.0003	0.0039	0.0003	0.0036
9	133759686	rs61746126	A	G	189.3	PASS	1	4174905	1	ABL1	nonsynonymous SNV	.	.	not provided	not_specified	RCV000119938.1	MedGen	CN169374	0.0004	0.0008	.	.	0.001	.	0.0004	0.0003	0.0004	0.0006	0	0.0003	0	0.0006	0.0002	.	0.0002	.	.	0.0004	0.0002	0.0002	0.0001	0.0006	0	0.0004	0.0008	0.0006	0.0004	0.0001	0.0012
9	133760790	rs367600262	C	T	159.2	PASS	1	763	1	ABL1	nonsynonymous SNV	COSM4658545;COSM4658547;COSM4658546	1(large_intestine)	.	.	.	.	.	0.0002	0.0008	.	.	.	.	0.0001	0.0004	8.65e-05	0	0	3.02e-05	0.0011	0.0006	0.0001	0.0002	.	.	.	0.0001	0.0005	5.96e-05	0	0	0	4.49e-05	0.0002	0.0004	0.0002	0.0007	0
9	134004820	rs141418879	T	C	186.4	PASS	1	1416	1	NUP214	nonsynonymous SNV	.	.	.	.	.	.	.	0.0002	.	.	.	0.001	.	0.0004	0.0002	0.0003	0	0.0002	0.0006	0	0	0.0004	.	0.0006	.	.	0.0004	0.0003	0.0003	0	0	0.0003	0.0008	0.0007	3.25e-05	0.0004	0	0
9	134008519	.	T	C	401.6	PASS	1	4128435	1	NUP214	nonsynonymous SNV	COSM5093109;COSM1460590	1(large_intestine)	.	.	.	.	.	.	.	.	.	.	.	.	.	.	.	.	.	.	.	.	.	.	.	.	.	.	.	.	.	.	.	.	.	.	.	.
9	134026117	.	C	T	2017.2	PASS	1	829	1	NUP214	nonsynonymous SNV	.	.	.	.	.	.	.	.	.	.	.	.	.	.	.	.	.	.	.	.	.	.	.	.	.	.	.	.	.	.	.	.	.	.	.	.	.	.
9	134050955	rs140412899	C	T	890.1	PASS	1	1319	1	NUP214	nonsynonymous SNV	.	.	.	.	.	.	.	0.0004	.	.	0.002	.	.	6.63e-05	0	8.67e-05	0.0006	0	3.01e-05	0	0	.	.	.	.	.	5.69e-05	0	8.93e-05	0	0.0002	0	6.28e-05	0	0	9.69e-05	0	0
9	134072879	.	G	GT	277	PASS	1	1491	1	NUP214	frameshift insertion
9	135776211	.	T	C	722.9	PASS	1	1298	1	TSC1	nonsynonymous SNV	.	.	.	.	.	.	.	.	.	.	.	.	.	.	.	.	.	.	.	.	.	.	.	.	.	.	.	.	.	.	.	.	.	.	.	.	.	.
9	135786013	rs118203504	G	A	3452.4	PASS	2	396;875	2,1	TSC1	nonsynonymous SNV	.	.	Likely benign|Likely benign|Likely benign|Likely benign|Likely benign	Tuberous_sclerosis_syndrome|not_specified|Hereditary_cancer-predisposing_syndrome|Tuberous_sclerosis_1|Focal_cortical_dysplasia_of_Taylor	RCV000041998.3|RCV000122186.5|RCV000163452.2|RCV000226529.2|RCV000383299.1	MedGen:Orphanet:SNOMED_CT|MedGen|MedGen:SNOMED_CT|MedGen:OMIM|MedGen:OMIM:Orphanet	C0041341:ORPHA805:7199000|CN169374|C0027672:699346009|C1854465:191100|C1846385:607341:ORPHA268994	0.0002	.	.	0.001	.	.	0.0004	0.0003	0.0002	0.0002	0	0.0006	0	0.0001	0.0006	0.0005	0.0007	.	.	0.0004	0.0003	0.0001	0	0.0001	8.99e-05	0.0006	0.0002	9.75e-05	0.0003	0.0002	0
9	135973982	.	T	C	443.1	PASS	1	577	1	RALGDS	nonsynonymous SNV	.	.	.	.	.	.	.	.	.	.	.	.	.	.	.	.	.	.	.	.	.	.	.	.	.	.	.	.	.	.	.	.	.	.	.	.	.	.
9	136031455	.	G	A	404.9	PASS	1	4141476	1	RALGDS	stopgain
9	136899924	rs149702159	T	C	625.8	PASS	3	1162;4126692;4184094	1,1,1	BRD3	nonsynonymous SNV	.	.	.	.	.	.	.	0.0004	.	0.0014	.	0.001	.	0.0023	0.0002	0.0013	0	0.0023	0.0036	0.0011	0.0004	0.0028	.	0.0042	.	.	0.0021	0.0002	0.0011	0.0001	0	0.0021	0.0036	0.002	0.0005	0.0037	0.0006	0.0012
9	139391876	.	C	T	377.4	PASS	1	4126692	1	NOTCH1	nonsynonymous SNV	.	.	.	.	.	.	.	.	.	.	.	.	.	.	.	.	.	.	.	.	.	.	.	.	.	.	.	.	.	.	.	.	.	.	.	.	.	.
9	139401234	rs182330532	G	A	1001.2	PASS	1	55	1	NOTCH1	nonsynonymous SNV	COSM99653;COSM99654	1(upper_aerodigestive_tract)	Uncertain significance|Uncertain significance	Adams-Oliver_syndrome_5|Cardiovascular_phenotype	RCV000225891.2|RCV000246340.1	MedGen:OMIM|MedGen	CN219575:616028|CN230736	0.0004	.	0.0014	.	0.001	.	0.0003	0	0.0004	0	0	0.0005	0	0	0.0007	0.0002	0.0009	.	.	0.0004	0	0.0002	0.0019	0	0	0.0005	0.0008	0	0.0005	0.0005	0.0024
9	139405111	rs201620358	G	A	289.1	PASS	5	1319;199;4144633;4145391;4175837	1,1,1,1,1	NOTCH1	nonsynonymous SNV	COSM3724370;COSM3724369	1(haematopoietic_and_lymphoid_tissue);1(soft_tissue);1(kidney);2(upper_aerodigestive_tract)	Uncertain significance|Likely benign|Likely benign|Uncertain significance	not_specified|Thoracic_aortic_aneurysm_and_aortic_dissection|Adams-Oliver_syndrome_5|Cardiovascular_phenotype	RCV000121671.2|RCV000143938.1|RCV000227340.2|RCV000250404.1	MedGen|MedGen:Orphanet|MedGen:OMIM|MedGen	CN169374|CN118826:ORPHA91387|CN219575:616028|CN230736	0.0004	0.0008	.	.	0.001	.	0.0019	0.0006	0.0024	0.0002	0.0024	0.0028	0.0017	6.95e-05	0.0023	0.0005	0.0032	.	.	0.0017	0.0006	0.0019	0.0004	0.0002	0.0018	0.0026	0.0029	9.9e-05	0.0024	0.0009	0.006
9	139820166	rs540379507	G	A	176.4	PASS	2	4103570;4125240	1,1	TRAF2	nonsynonymous SNV	.	.	.	.	.	.	.	0.0002	.	.	0.001	.	.	2.49e-05	0	0	0.0002	0	1.51e-05	0	0	.	.	.	.	.	3.67e-05	0	2.98e-05	0	0.0002	0	4.51e-05	0	0	.	.	.
9	139820309	rs142412558	G	A	228.5	PASS	1	4177434	1	TRAF2	nonsynonymous SNV	COSM3905898;COSM3905899	1(stomach)	.	.	.	.	.	0.0004	.	0.0014	.	0.001	.	0.0002	9.63e-05	8.65e-05	0.0001	0	0.0002	0	6.06e-05	0.0004	0.0002	0.0005	.	.	0.0002	6.54e-05	8.93e-05	0	5.8e-05	0	0.0003	0.0002	3.25e-05	0.0001	0.0002	0
10	875350	rs144611807	G	A	255.7	PASS	1	447	1	LARP4B	nonsynonymous SNV	.	.	.	.	.	.	.	0.0002	.	.	.	0.001	.	7.66e-05	0.0003	0	0	0	9.21e-05	0	0	0.0003	0.0007	0.0001	.	.	9.87e-05	0.0001	0	0	0	4.51e-05	0.0002	0	3.31e-05	9.69e-05	0.0002	0
10	8100728	rs199565632	C	G	337	PASS	1	510	1	GATA3	nonsynonymous SNV	.	.	.	.	.	.	.	.	.	.	.	.	.	.	.	.	.	.	.	.	.	.	.	.	.	.	.	.	.	.	.	.	.	.	.	.	.	.
10	8115898	.	T	C	1369.5	PASS	1	1165	1	GATA3	nonsynonymous SNV	.	.	.	.	.	.	.	.	.	.	.	.	.	.	.	.	.	.	.	.	.	.	.	.	.	.	.	.	.	.	.	.	.	.	.	.	.	.
10	21906135	rs146946726	A	G	569.8	PASS	6	114;393;558;663;753;753	1,1,1,1,1,1	MLLT10	nonsynonymous SNV	.	.	.	.	.	.	.	0.0012	0.0015	0.0029	.	0.002	.	0.0007	0.0015	0.0016	0	0	0.0007	0	0.0001	0.0011	0.0018	0.0007	.	.	0.0006	0.0013	0.0017	0.0001	0	0	0.0006	0.0025	8.15e-05	0.0008	0.0015	0.0048
10	22015195	rs181699146	C	T	1469.7	PASS	1	197	1	MLLT10	nonsynonymous SNV	.	.	.	.	.	.	.	0.0004	.	0.0014	.	0.001	.	3.3e-05	0	0.0003	0	0	1.5e-05	0	0	.	.	.	.	.	4.9e-05	0	0.0003	0	0	0	8.98e-06	0	0	.	.	.
10	22015240	rs202106072	C	T	761.2	PASS	1	1452	1	MLLT10	nonsynonymous SNV	.	.	.	.	.	.	.	0.0002	.	.	.	0.001	.	9.89e-05	0	0.0007	0	0	4.5e-05	0.0011	0	0.0001	.	0.0001	.	.	0.0001	0	0.0007	0	0	0	6.27e-05	0.0002	0	0.0001	0.0001	0
10	22019855	rs142554860	G	A	814.6	PASS	7	168;385;4128435;4135350;4137230;4167925;4177406	1,1,1,1,1,1,1	MLLT10	nonsynonymous SNV	.	.	.	.	.	.	.	0.0002	.	0.0014	.	.	.	0.0026	0.0002	8.64e-05	0.0001	0.0015	0.0045	0.0011	0	0.0024	.	0.0036	.	.	0.002	0.0003	0.0003	0.0023	5.8e-05	0.0014	0.0038	0.0013	0	0.0027	0.0003	0
10	27037641	.	T	A	643.1	PASS	1	4138059	1	ABI1	nonsynonymous SNV	.	.	.	.	.	.	.	.	.	.	.	.	.	.	.	.	.	.	.	.	.	.	.	.	.	.	.	.	.	.	.	.	.	.	.	.	.	.
10	27044667	rs143322305	G	A	2048.4	PASS	1	331	1	ABI1	nonsynonymous SNV	.	.	.	.	.	.	.	0.0008	.	.	.	0.002	0.002	0.0009	0.0002	0.0002	0	0.0021	0.001	0	0.0012	0.0009	.	0.0014	.	.	0.0008	0.0003	0.0001	0.0015	0	0.0019	0.001	0.0005	0.001	0.0009	0.0003	0
10	27066073	rs145810798	G	A	1738.2	PASS	1	297	1	ABI1	nonsynonymous SNV	.	.	.	.	.	.	.	0.0002	.	0.0014	.	.	.	0.0004	0	0	0	0	0.0007	0.0011	6.06e-05	0.0003	.	0.0005	.	.	0.0004	0	0.0001	0	0	0	0.0007	0.0002	6.5e-05	0.0002	0.0001	0
10	27149767	.	T	A	229	PASS	1	4171810	1	ABI1	nonsynonymous SNV	.	.	.	.	.	.	.	.	.	.	.	.	.	.	.	.	.	.	.	.	.	.	.	.	.	.	.	.	.	.	.	.	.	.	.	.	.	.
10	28824554	.	G	A	491.2	PASS	1	815	1	WAC	nonsynonymous SNV	.	.	.	.	.	.	.	.	.	.	.	.	.	.	.	.	.	.	.	.	.	.	.	.	.	.	.	.	.	.	.	.	.	.	.	.	.	.
10	28897205	.	C	T	1419.5	PASS	2	139;366	1,1	WAC	nonsynonymous SNV	.	.	.	.	.	.	.	.	.	.	.	.	.	.	.	.	.	.	.	.	.	.	.	.	.	.	.	.	.	.	.	.	.	.	.	.	.	.
10	28900272	.	TAAAC	T	205.8	PASS	1	4177406	1	WAC	frameshift deletion
10	31809579	rs1432181026	A	G	937	PASS	1	829	1	ZEB1	nonsynonymous SNV	.	.	.	.	.	.	.	.	.	.	.	.	.	.	.	.	.	.	.	.	.	.	.	.	.	.	.	.	.	.	.	.	.	.	.	.	.	.
10	31810679	rs141194628	A	G	604.4	PASS	5	182;4100314;4105782;4145056;4151471	1,1,1,1,1	ZEB1	nonsynonymous SNV	.	.	.	.	.	.	.	0.0012	.	0.0029	.	0.002	0.002	0.0025	9.62e-05	0.0015	0	0.0005	0.0034	0.0022	0.0031	0.0016	.	0.0024	.	.	0.0022	0.0003	0.0017	0.0011	0	0.001	0.0032	0.0016	0.0028	0.0021	0.0002	0.0024
10	31812927	rs143370284	A	C	725.9	PASS	2	127;1564	1,1	ZEB1	nonsynonymous SNV	COSM5574244;COSM5574245	1(haematopoietic_and_lymphoid_tissue)	.	.	.	.	.	0.0002	.	.	.	.	0.001	9.91e-05	0	8.68e-05	0	0	0.0002	0	6.06e-05	0.0002	.	0.0002	.	.	0.0001	0	0.0001	0	0	0	0.0002	0.0005	9.75e-05	0.0002	0	0.0012
10	31815644	rs1267931152	C	T	367.8	PASS	1	4182393	1	ZEB1	nonsynonymous SNV	.	.	.	.	.	.	.	.	.	.	.	.	.	.	.	.	.	.	.	.	.	.	.	.	.	.	.	.	.	.	.	.	.	.	.	.	.	.
10	32306230	.	G	A	676.9	PASS	1	4163639	1	KIF5B	stopgain	COSM1212486;COSM4439761	1(oesophagus);1(large_intestine)	.	.	.	.	.	.	.	.	.	.	.	.	.	.	.	.	.	.	.	.	.	.	.	.	.	.	.	.	.	.	.	.	.	.	.	.
10	32322960	rs182324493	G	A	771.2	PASS	1	1079	1	KIF5B	nonsynonymous SNV	.	.	.	.	.	.	.	0.0006	0.0023	.	.	.	.	0.0003	0.0013	8.68e-05	0	0	0.0003	0	0	0.0002	0.0002	0.0001	.	.	0.0003	0.0011	0.0005	0	0	0	0.0003	0.0005	4.46e-05	0.0003	0.0003	0.0012
10	43609063	.	G	C	411.4	PASS	1	4166940	1	RET	nonsynonymous SNV	.	.	.	.	.	.	.	.	.	.	.	.	.	.	.	.	.	.	.	.	.	.	.	.	.	.	.	.	.	.	.	.	.	.	.	.	.	.
10	51580923	.	C	T	600.7	PASS	1	4171706	1	NCOA4	nonsynonymous SNV	.	.	.	.	.	.	.	.	.	.	.	.	.	.	.	.	.	.	.	.	.	.	.	.	.	.	.	.	.	.	.	.	.	.	.	.	.	.
10	52575837	.	G	C	510.5	PASS	1	4126692	1	A1CF	nonsynonymous SNV	.	.	.	.	.	.	.	.	.	.	.	.	.	.	.	.	.	.	.	.	.	.	.	.	.	.	.	.	.	.	.	.	.	.	.	.	.	.
10	61552762	rs575393361	C	CGGAGGT	431.6	PASS	2	362;4193646	1,1	CCDC6	nonframeshift insertion	COSM4573685	1(bone);1(soft_tissue)	.	.	.	.	.	0.0008	.	.	.	0.004	.	0.0017	0.0005	0.0002	0	0.0015	0.0027	0.0011	0.0002	.	.	.	.	.	0.0017	0.0007	0.0003	0.0025	0	0.0019	0.0027	0.0018	0.0003	0.0023	0.0009	0
10	63700087	rs150284163	A	C	403	PASS	5	149;056;4101815;4133863;4177639	1,1,1,1,1	ARID5B	nonsynonymous SNV	.	.	.	.	.	.	.	0.001	.	0.0029	.	0.003	.	0.0013	0.0002	0.001	0	0.0008	0.0019	0.0011	0.0005	0.001	.	0.0015	.	.	0.0013	0.0001	0.0007	0.0015	0	0.0007	0.002	0.0027	0.0006	0.0008	0.0002	0
10	63845501	.	G	A	266	PASS	1	4134005	1	ARID5B	nonsynonymous SNV	.	.	.	.	.	.	.	.	.	.	.	.	.	.	.	.	.	.	.	.	.	.	.	.	.	.	.	.	.	.	.	.	.	.	.	.	.	.
10	70404656	.	G	A	431.4	PASS	1	4189200	1	TET1	nonsynonymous SNV	.	.	.	.	.	.	.	.	.	.	.	.	.	.	.	.	.	.	.	.	.	.	.	.	.	.	.	.	.	.	.	.	.	.	.	.	.	.
10	70405053	rs199602262	C	A	2308.7	PASS	1	341	1	TET1	nonsynonymous SNV	.	.	.	.	.	.	.	0.0002	.	0.0014	.	.	.	6.6e-05	0	0.0005	0	0	3e-05	0	0	.	.	.	.	.	6.51e-05	0	0.0002	0	0	0	4.48e-05	0.0005	0	.	.	.
10	70451518	.	G	A	1047.9	PASS	1	375	1	TET1	nonsynonymous SNV	COSM327331	2(haematopoietic_and_lymphoid_tissue);1(lung)	.	.	.	.	.	.	.	.	.	.	.	.	.	.	.	.	.	.	.	.	.	.	.	.	.	.	.	.	.	.	.	.	.	.	.	.
10	72357817	rs768505698	C	T	793.5	PASS	1	1163	1	PRF1	nonsynonymous SNV	COSM2160494	1(upper_aerodigestive_tract)	.	.	.	.	.	.	.	.	.	.	.	.	.	.	.	.	.	.	.	.	.	.	.	.	.	.	.	.	.	.	.	.	.	.	.	.
10	76748798	.	T	C	607.5	PASS	1	1290	1	KAT6B	nonsynonymous SNV	.	.	.	.	.	.	.	.	.	.	.	.	.	.	.	.	.	.	.	.	.	.	.	.	.	.	.	.	.	.	.	.	.	.	.	.	.	.
10	76789368	.	C	A	423.3	PASS	1	1581	1	KAT6B	nonsynonymous SNV	.	.	.	.	.	.	.	.	.	.	.	.	.	.	.	.	.	.	.	.	.	.	.	.	.	.	.	.	.	.	.	.	.	.	.	.	.	.
10	76789417	rs72803461	G	A	562.7	PASS	3	1431;4119702;4147968	1,1,1	KAT6B	nonsynonymous SNV	.	.	Likely benign|Benign	KAT6B-Related_Spectrum_Disorders|not_specified	RCV000375767.1|RCV000438668.1	MedGen|MedGen	CN239406|CN169374	0.0006	.	.	.	0.003	.	0.0024	0.0007	8.64e-05	0	0.0011	0.004	0	0.0005	0.0034	0.0007	0.0048	.	.	0.0023	0.001	0.0002	0	5.8e-05	0.0009	0.0045	0.0015	0.0004	0.0021	0.0013	0
10	88681437	rs35619497	C	T	503.3	PASS	1	1187	1	BMPR1A	nonsynonymous SNV
10	93999812	.	G	A	217.2	PASS	1	1452	1	CPEB3	nonsynonymous SNV	.	.	.	.	.	.	.	.	.	.	.	.	.	.	.	.	.	.	.	.	.	.	.	.	.	.	.	.	.	.	.	.	.	.	.	.	.	.
10	96798795	rs143386810	C	T	580.2	PASS	3	464;815;4158726	1,1,1	CYP2C8	nonsynonymous SNV	.	.	.	.	.	.	.	0.0004	.	.	.	0.001	0.001	0.0008	9.61e-05	0.0006	0	0	0.0007	0	0.0025	0.0007	0.0002	0.0009	.	.	0.0009	0.0003	0.0008	0.0005	0	4.49e-05	0.001	0.0007	0.0026	0.0007	0.0006	0.0012
10	96824654	.	A	C	390	PASS	1	4109956	1	CYP2C8	nonsynonymous SNV	.	.	.	.	.	.	.	.	.	.	.	.	.	.	.	.	.	.	.	.	.	.	.	.	.	.	.	.	.	.	.	.	.	.	.	.	.	.
10	96827394	.	C	T	682.2	PASS	1	1228	1	CYP2C8	nonsynonymous SNV	.	.	.	.	.	.	.	.	.	.	.	.	.	.	.	.	.	.	.	.	.	.	.	.	.	.	.	.	.	.	.	.	.	.	.	.	.	.
10	96829148	rs1207535747	AAAAGG	A	221.6	PASS	1	1353	1	CYP2C8	frameshift deletion
10	104353782	rs1403040084	G	A	296.5	PASS	1	177	1	SUFU	nonsynonymous SNV	COSM4730796	1(large_intestine)	.	.	.	.	.	.	.	.	.	.	.	.	.	.	.	.	.	.	.	.	.	.	.	.	0	0	0	0	0	0	0	0	0	.	.	.
10	104858719	rs116066839	A	G	166.9	PASS	1	4142267	1	NT5C2	nonsynonymous SNV	.	.	.	.	.	.	.	0.0006	.	.	0.003	.	.	0.0002	0	0	0.0026	0	2.04e-05	0	7.56e-05	.	.	.	.	.	0.0002	0	0	0	0.0021	0	9.17e-06	0	9.93e-05	3.23e-05	0	0
10	104860821	.	T	C	276.2	PASS	1	266	1	NT5C2	nonsynonymous SNV	.	.	.	.	.	.	.	.	.	.	.	.	.	.	.	.	.	.	.	.	.	.	.	.	.	.	.	.	.	.	.	.	.	.	.	.	.	.
10	114220336	.	G	T	575.7	PASS	2	753	1	VTI1A	stopgain	.	.	.	.	.	.	.	.	.	.	.	.	.	.	.	.	.	.	.	.	.	.	.	.	.	.	.	.	.	.	.	.	.	.	.	.	.	.
10	114224379	rs142137912	G	A	331	PASS	1	580	1	VTI1A	nonsynonymous SNV	.	.	.	.	.	.	.	0.0002	.	.	.	0.001	.	0.0004	0.0001	8.81e-05	0	0.0002	0.0007	0	0	0.0006	0.0002	0.0008	0.011	0.0082	0.0005	6.63e-05	5.96e-05	0	0	8.99e-05	0.0009	0.0004	0	0.0004	0.0002	0
10	114428735	.	A	T	394.2	PASS	1	4128852	1	VTI1A	nonsynonymous SNV	.	.	.	.	.	.	.	.	.	.	.	.	.	.	.	.	.	.	.	.	.	.	.	.	.	.	.	.	.	.	.	.	.	.	.	.	.	.
10	123263356	.	C	T	420.3	PASS	1	15	1	FGFR2	nonsynonymous SNV	COSM5682718;COSM5682715;COSM5682717;COSM5682716;COSM5682719	1(lung)	.	.	.	.	.	.	.	.	.	.	.	.	.	.	.	.	.	.	.	.	.	.	.	.	.	.	.	.	.	.	.	.	.	.	.	.
10	123325096	.	G	C	614.3	PASS	1	1418	1	FGFR2	nonsynonymous SNV	.	.	.	.	.	.	.	.	.	.	.	.	.	.	.	.	.	.	.	.	.	.	.	.	.	.	.	.	.	.	.	.	.	.	.	.	.	.
10	131334530	rs536098805	G	A	804.3	PASS	1	171	1	MGMT	nonsynonymous SNV	.	.	.	.	.	.	.	0.0002	.	.	.	0.001	.	8.24e-06	0	0	0	0	1.5e-05	0	0	.	.	.	.	.	4.06e-06	0	0	0	0	0	8.95e-06	0	0	.	.	.
11	3028171	rs187175475	A	T	529.2	PASS	1	192	1	CARS	nonsynonymous SNV	.	.	.	.	.	.	.	0.0002	.	0.0014	.	.	.	7.47e-05	0	0.0003	0	0	7.55e-05	0	0	.	.	.	.	.	0.0001	0	0.0003	0	0	0	0.0001	0.0004	0	.	.	.
11	3060432	rs558009289	C	T	688.7	PASS	2	004;142	1,1	CARS	nonsynonymous SNV	COSM1199596;COSM1199595	1(large_intestine)	.	.	.	.	.	0.0002	.	.	.	0.001	.	0.0001	0	0.0007	0	0	0.0001	0	0.0001	.	.	.	.	.	0.0002	0	0.0006	0	0	0	0.0002	0	6.52e-05	9.7e-05	0	0.0012
11	3060507	rs149387799	G	A	245.1	PASS	1	4187640	1	CARS	nonsynonymous SNV	.	.	.	.	.	.	.	0.0002	.	.	.	0.001	.	0.0006	9.66e-05	8.66e-05	0	0.0029	0.0007	0	0.0001	0.001	0.0002	0.0014	.	.	0.0006	0.0001	8.95e-05	0	0	0.0022	0.0009	0.0004	9.75e-05	0.0009	0.0007	0
11	3062130	rs200923551	C	T	327.9	PASS	1	171	1	CARS	nonsynonymous SNV	.	.	.	.	.	.	.	0.0002	.	.	.	0.001	.	1.65e-05	0	8.65e-05	0	0	1.5e-05	0	0	.	.	.	.	.	1.63e-05	0	5.96e-05	0	0	0	1.8e-05	0	0	.	.	.
11	3716782	rs144659895	C	T	916	PASS	2	052;4124188	1,1	NUP98	nonsynonymous SNV	COSM3967487;COSM3967486	1(central_nervous_system)	.	.	.	.	.	0.0004	.	.	.	0.002	.	0.0006	0.0004	0	0	0.0002	0.001	0	0	0.0006	.	0.0009	.	0.0082	0.0006	0.0004	0.0002	0	0	0.0003	0.0011	0.0008	0	0.0005	0.0001	0
11	3721942	rs144628791	C	T	554.9	PASS	1	283	1	NUP98	nonsynonymous SNV	.	.	.	.	.	.	.	0.0006	0.0015	.	.	0.001	.	0.0004	0.0024	0.0006	0	0	0.0001	0.0011	0	0.0013	0.003	0.0005	.	.	0.0004	0.0026	0.0008	0	0	0	0.0002	0.0005	0	0.0008	0.0025	0
11	3723730	rs148101240	C	T	147.7	PASS	1	1188	1	NUP98	nonsynonymous SNV	.	.	.	.	.	.	.	0.0008	.	0.0029	.	0.002	.	0.0006	0.0002	0.0005	0	0	0.0009	0	0	0.0006	.	0.0009	.	.	0.0008	6.54e-05	0.0007	0.0122	0	0	0.0003	0.0015	0	0.0002	0	0
11	8252033	.	A	G	488.1	PASS	1	1587	1	LMO1	nonsynonymous SNV	.	.	.	.	.	.	.	.	.	.	.	.	.	.	.	.	.	.	.	.	.	.	.	.	.	.	.	.	.	.	.	.	.	.	.	.	.	.
11	44193165	rs138187791	G	A	1630.5	PASS	4	821;886;1425;4130865	1,1,1,1	EXT2	nonsynonymous SNV	.	.	not provided|Likely benign	not_specified|Hereditary_Multiple_Osteochondromatosis	RCV000120891.1|RCV000373135.1	MedGen|MedGen	CN169374|CN239374	0.001	.	0.0043	.	0.001	0.001	0.0008	0.0004	0.0016	0	0.0002	0.0011	0.0011	0	0.0012	0.0002	0.0017	.	.	0.0011	0.0002	0.0024	0.0001	0	8.97e-05	0.0015	0.0016	6.5e-05	0.0005	0.0002	0.0012
11	44265743	.	C	T	538.6	PASS	1	4190495	1	EXT2	nonsynonymous SNV	.	.	.	.	.	.	.	.	.	.	.	.	.	.	.	.	.	.	.	.	.	.	.	.	.	.	.	.	.	.	.	.	.	.	.	.	.	.
11	46299714	rs1384561178	A	G	208.5	PASS	1	4104105	1	CREB3L1	nonsynonymous SNV	.	.	.	.	.	.	.	.	.	.	.	.	.	.	.	.	.	.	.	.	.	.	.	.	.	.	.	.	.	.	.	.	.	.	.	.	.	.
11	46321561	rs542539617	G	C	411.3	PASS	1	4183136	1	CREB3L1	nonsynonymous SNV	.	.	.	.	.	.	.	0.0002	.	.	.	0.001	.	8.33e-06	0	0	0	0	1.51e-05	0	0	.	.	.	.	.	4.06e-06	0	0	0	0	0	8.95e-06	0	0	.	.	.
11	46321657	rs200839792	G	A	545.2	PASS	1	1079	1	CREB3L1	nonsynonymous SNV	.	.	.	.	.	.	.	0.0002	.	0.0014	.	.	.	0.0007	0.0004	0.0002	0.0004	0.0002	0.001	0	0.0005	0.0009	0.0002	0.0012	.	.	0.0007	0.0005	0.0002	0	0.0003	8.98e-05	0.0011	0.0009	0.0005	0.0006	0.0001	0.0012
11	46321667	rs190038304	C	T	295	PASS	1	283	1	CREB3L1	nonsynonymous SNV	.	.	.	.	.	.	.	0.0008	0.0015	.	.	0.002	.	0.0014	0.0025	0.0003	0	0.0002	0.0019	0.0012	0.0005	0.001	0.0007	0.0011	.	.	0.001	0.0021	0.0004	0.0001	0	0.0002	0.0016	0.0009	0.0006	0.001	0.0014	0
11	46338958	.	G	C	812.6	PASS	1	464	1	CREB3L1	nonsynonymous SNV	.	.	.	.	.	.	.	.	.	.	.	.	.	.	.	.	.	.	.	.	.	.	.	.	.	.	.	.	.	.	.	.	.	.	.	.	.	.
11	47256317	.	C	T	441.5	PASS	1	784	1	DDB2	nonsynonymous SNV	.	.	.	.	.	.	.	.	.	.	.	.	.	.	.	.	.	.	.	.	.	.	.	.	.	.	.	.	.	.	.	.	.	.	.	.	.	.
11	47259415	.	A	G	335.2	PASS	1	4100314	1	DDB2	nonsynonymous SNV	.	.	.	.	.	.	.	.	.	.	.	.	.	.	.	.	.	.	.	.	.	.	.	.	.	.	.	.	.	.	.	.	.	.	.	.	.	.
11	57427232	rs200951285	A	G	598	PASS	1	4171586	1	CLP1	nonsynonymous SNV	.	.	.	.	.	.	.	0.0002	.	0.0014	.	.	.	0.0003	9.61e-05	8.64e-05	0	0.0002	0.0004	0.0011	0	.	.	.	.	.	0.0002	6.53e-05	5.96e-05	0	0	8.97e-05	0.0003	0.0002	0	0.0005	0.0001	0.0012
11	57561543	rs76817459	A	G	1839	PASS	2	756;4189998	1,1	CTNND1	nonsynonymous SNV	COSM3383603;COSM3383602	1(pancreas)	.	.	.	.	.	0.0008	.	0.0029	.	0.002	.	0.001	0.0003	0.001	0	0	0.0017	0	6.06e-05	0.0012	0.0005	0.0015	.	.	0.0012	0.0001	0.0007	0.0135	0	0.0001	0.0011	0.0009	0.0002	0.0005	0.0003	0.0036
11	57563049	rs61754546	G	A	349.7	PASS	1	4178345	1	CTNND1	nonsynonymous SNV	.	.	.	.	.	.	.	0.0002	.	.	.	0.001	.	4.82e-05	0.0001	0	0	0	6.35e-05	0	0	.	.	.	.	.	4.16e-05	0	9.22e-05	0	0	0	5.5e-05	0.0002	0	6.46e-05	0	0
11	57564350	rs201654277	G	T	625.8	PASS	1	4186812	1	CTNND1	nonsynonymous SNV	.	.	.	.	.	.	.	0.0002	.	.	.	0.001	.	5.99e-05	0	0	0	0.0002	9.19e-05	0	0	0.0001	.	0.0001	.	.	3.69e-05	0	0	0	0	0	7.24e-05	0.0002	0	3.23e-05	0	0
11	57571209	rs199990235	A	G	2054	PASS	3	170;328;709	1,1,1	CTNND1	nonsynonymous SNV	.	.	.	.	.	.	.	0.0006	.	0.0014	.	0.002	.	0.0006	0	0.0028	0	0	0.0005	0	0	0.0002	.	0.0002	.	.	0.0005	0	0.0013	0	0	0	0.0005	0.0029	0	0.0003	0	0.0036
11	57573934	rs200943999	T	G	1613.7	PASS	1	1239	1	CTNND1	nonsynonymous SNV	COSM3687393	1(large_intestine)	.	.	.	.	.	0.0004	.	.	.	.	0.002	0.0004	0	0	0	0.0002	0.0005	0	0.0007	.	.	.	.	.	0.0002	0	0	0	0	0.0002	0.0002	0.0002	0.0005	0.0003	0	0
11	57577619	rs556628331	T	C	4559.4	PASS	1	395	1	CTNND1	nonsynonymous SNV	.	.	.	.	.	.	.	0.0002	.	0.0014	.	.	.	3.33e-05	0	8.7e-05	0	0	4.52e-05	0	0	.	.	.	.	.	4.49e-05	6.56e-05	0.0001	0	0	0	2.69e-05	0.0005	0	6.46e-05	0.0002	0
11	57577625	.	A	G	478	PASS	1	4197155	1	CTNND1	nonsynonymous SNV	.	.	.	.	.	.	.	.	.	.	.	.	.	.	.	.	.	.	.	.	.	.	.	.	.	.	.	.	.	.	.	.	.	.	.	.	.	.
11	61563607	.	G	C	481	PASS	1	4146301	1	FEN1	nonsynonymous SNV	.	.	.	.	.	.	.	.	.	.	.	.	.	.	.	.	.	.	.	.	.	.	.	.	.	.	.	.	.	.	.	.	.	.	.	.	.	.
11	62569037	rs199769585	G	C	214.1	PASS	1	306	1	NXF1	nonsynonymous SNV	.	.	.	.	.	.	.	0.0002	.	.	.	0.001	.	0.0002	0	0.0016	0	0	7.49e-05	0	0	.	.	.	.	.	0.0003	0	0.0021	0	0	0	6.27e-05	0.0009	0	6.46e-05	0	0.0012
11	69457947	.	C	G	472	PASS	1	4164330	1	CCND1	nonsynonymous SNV	.	.	.	.	.	.	.	.	.	.	.	.	.	.	.	.	.	.	.	.	.	.	.	.	.	.	.	.	.	.	.	.	.	.	.	.	.	.
11	71146480	rs371873032	G	A	530.8	PASS	2	018;312	1,1	DHCR7	nonsynonymous SNV	.	.	.	.	.	.	.	0.0002	.	.	.	0.001	.	9.39e-05	0	8.71e-05	0	0	0.0002	0	0	0.0002	.	0.0002	.	.	6.58e-05	0	5.96e-05	0	0	0	0.0001	0	0	.	.	.
11	71146761	rs200539324	C	T	334	PASS	1	4163741	1	DHCR7	nonsynonymous SNV	.	.	.	.	.	.	.	0.0002	.	.	.	0.001	.	0.0003	0	0	0	0.0008	0.0004	0.0012	0.0002	.	.	.	.	.	0.0002	6.63e-05	0	0	0	0.0008	0.0003	0.0004	0.0001	0.0002	0	0
11	71148959	rs565893436	C	T	404.3	PASS	1	186	1	DHCR7	nonsynonymous SNV	COSM3452903;COSM3452902	5(skin);1(large_intestine)	.	.	.	.	.	0.0002	.	.	.	0.001	.	1.66e-05	0	0	0	0	3.01e-05	0	0	.	.	.	.	.	1.63e-05	0	5.96e-05	0	0	0	1.79e-05	0	0	.	.	.
11	71715042	.	G	C	327.3	PASS	1	307	1	NUMA1	nonsynonymous SNV	.	.	.	.	.	.	.	.	.	.	.	.	.	.	.	.	.	.	.	.	.	.	.	.	.	.	.	.	.	.	.	.	.	.	.	.	.	.
11	71715733	rs35681270	G	A	245.6	PASS	1	4142761	1	NUMA1	nonsynonymous SNV	COSM5641086;COSM5641085	1(oesophagus)	.	.	.	.	.	0.0006	0.0008	.	.	0.002	.	0.0016	0.0003	0.0003	0	0.0008	0.0028	0	0	0.0014	0.0007	0.0017	.	0.0082	0.0013	0.0003	0.0004	0	0	0.0007	0.0026	0.0009	6.5e-05	0.0012	0.0005	0
11	71717179	.	T	C	766.3	PASS	1	566	1	NUMA1	nonsynonymous SNV	.	.	.	.	.	.	.	.	.	.	.	.	.	.	.	.	.	.	.	.	.	.	.	.	.	.	.	.	.	.	.	.	.	.	.	.	.	.
11	71718414	rs200233406	G	A	347.6	PASS	1	4174905	1	NUMA1	nonsynonymous SNV	.	.	.	.	.	.	.	0.0002	0.0008	.	.	.	.	0.0002	9.87e-05	0	0	0.0005	0.0002	0.0023	0	0.0002	.	0.0002	.	.	0.0001	0.0001	2.98e-05	0	0	0.0004	0.0002	0	0	0.0002	0.0001	0
11	71725857	.	G	A	423.9	PASS	1	4178345	1	NUMA1	nonsynonymous SNV	.	.	.	.	.	.	.	.	.	.	.	.	.	.	.	.	.	.	.	.	.	.	.	.	.	.	.	.	.	.	.	.	.	.	.	.	.	.
11	71726379	rs138657430	T	C	547.1	PASS	1	580	1	NUMA1	nonsynonymous SNV	.	.	.	.	.	.	.	0.0002	.	.	.	0.001	.	0.0002	0	0.0002	0	0	0.0004	0	0	0.0004	0.0002	0.0005	.	.	0.0003	0	0.0004	0	0	9.14e-05	0.0005	0.0005	0	0.0004	0.0002	0
11	71726438	.	A	G	889.1	PASS	1	764	1	NUMA1	nonsynonymous SNV	.	.	.	.	.	.	.	.	.	.	.	.	.	.	.	.	.	.	.	.	.	.	.	.	.	.	.	.	.	.	.	.	.	.	.	.	.	.
11	71726622	rs149446307	G	A	311.7	PASS	1	283	1	NUMA1	nonsynonymous SNV	.	.	.	.	.	.	.	0.0004	.	.	.	0.002	.	0.0003	0.0004	0	0.0001	0	0.0005	0.0011	0	0.0006	.	0.0009	.	.	0.0004	0.0004	5.96e-05	0.0017	0.0002	0	0.0005	0.0002	0	0.0003	0.0003	0
11	71729276	rs139359161	G	A	693.6	PASS	2	709;125	1,1	NUMA1	nonsynonymous SNV	.	.	.	.	.	.	.	0.0002	.	.	.	.	0.001	0.0005	9.61e-05	8.64e-05	0	0	0.0005	0	0.0016	0.0003	.	0.0005	.	.	0.0004	0.0003	0.0003	0	0	0	0.0004	0.0005	0.0015	0.0002	0.0001	0
11	85701307	rs117411388	T	C	728.6	PASS	1	165	1	PICALM	nonsynonymous SNV	.	.	.	.	.	.	.	0.0006	.	0.0014	.	0.002	.	0.0007	9.63e-05	0.0003	0	0.0006	0.0011	0	0.0005	0.0008	.	0.0013	.	.	0.0007	0.0001	0.0003	0.0012	0	0.0005	0.0011	0.0011	0.0005	0.0005	0.0003	0
11	85726006	rs779752380	C	T	184.5	PASS	1	326	1	PICALM	stopgain
11	85779721	rs146840505	G	C	375.1	PASS	3	1226;4113140;4128477	1,1,1	PICALM	nonsynonymous SNV	.	.	.	.	.	.	.	0.0004	.	.	.	0.002	.	0.0016	0.0003	8.86e-05	0	0.0035	0.0026	0.0011	0	0.0012	0.0002	0.0017	0.011	.	0.0014	0.0005	0.0002	0	0	0.0026	0.0025	0.0007	3.25e-05	0.0014	0	0.0012
11	92085402	.	C	T	1212.6	PASS	1	1512	1	FAT3	nonsynonymous SNV	.	.	.	.	.	.	.	.	.	.	.	.	.	.	.	.	.	.	.	.	.	.	.	.	.	.	.	.	.	.	.	.	.	.	.	.	.	.
11	92085978	.	G	C	971.7	PASS	1	1413	1	FAT3	nonsynonymous SNV	.	.	.	.	.	.	.	.	.	.	.	.	.	.	.	.	.	.	.	.	.	.	.	.	.	.	.	.	.	.	.	.	.	.	.	.	.	.
11	92086866	.	A	C	233.2	PASS	1	4181460	1	FAT3	nonsynonymous SNV	.	.	.	.	.	.	.	.	.	.	.	.	.	.	.	.	.	.	.	.	.	.	.	.	.	.	.	.	.	.	.	.	.	.	.	.	.	.
11	92088192	rs146432830	C	T	406.9	PASS	1	4105105	1	FAT3	nonsynonymous SNV	.	.	.	.	.	.	.	0.0002	0.0008	.	.	.	.	1.66e-05	0.0002	0	0	0	0	0	0	0.0001	0.0003	.	.	.	3.26e-05	0.0002	2.99e-05	0.0001	0	0	2.69e-05	0	0	9.69e-05	0.0002	0
11	92088196	.	A	G	1042.7	PASS	1	40	1	FAT3	nonsynonymous SNV	.	.	.	.	.	.	.	.	.	.	.	.	.	.	.	.	.	.	.	.	.	.	.	.	.	.	.	.	.	.	.	.	.	.	.	.	.	.
11	92257830	rs143194286	G	A	374.2	PASS	2	1177;306	1,1	FAT3	nonsynonymous SNV	.	.	.	.	.	.	.	0.0002	.	0.0014	.	.	.	0.0002	0	0.0016	0.0001	0	0.0001	0.0011	0	0.0001	.	0.0001	.	.	0.0002	0	0.0013	0	0.0001	0	8.12e-05	0	0	9.7e-05	0	0.0012
11	92531088	.	T	A	1940.1	PASS	1	1298	1	FAT3	nonsynonymous SNV	.	.	.	.	.	.	.	.	.	.	.	.	.	.	.	.	.	.	.	.	.	.	.	.	.	.	.	.	.	.	.	.	.	.	.	.	.	.
11	92532207	rs1302145611	C	A	507.2	PASS	1	1080	1	FAT3	nonsynonymous SNV	.	.	.	.	.	.	.	.	.	.	.	.	.	.	.	.	.	.	.	.	.	.	.	.	.	.	.	.	.	.	.	.	.	.	.	.	.	.
11	92533495	rs149993900	G	A	1887	PASS	2	027;1472	1,1	FAT3	nonsynonymous SNV	COSM4037557;COSM4037556	1(stomach)	.	.	.	.	.	0.0002	.	.	.	0.001	.	0.0002	0.0001	0.0003	0	0	0.0004	0	6.06e-05	0.0004	.	0.0006	.	.	0.0002	0.0002	0.0002	0	0	4.49e-05	0.0003	0	9.75e-05	0.0003	0.0001	0
11	92533558	rs200944979	G	A	478.9	PASS	1	1167	1	FAT3	nonsynonymous SNV	COSM4758814;COSM4758813	1(stomach)	.	.	.	.	.	0.0004	.	.	.	0.002	.	0.0006	0.0002	0.0003	0	0	0.001	0	0	0.0008	0.0002	0.0011	.	.	0.0007	0.0005	0.0005	0	0	0.0002	0.0013	0.0007	6.5e-05	0.0008	0.0006	0.0024
11	92533594	.	C	G	390.1	PASS	1	1403	1	FAT3	nonsynonymous SNV	.	.	.	.	.	.	.	.	.	.	.	.	.	.	.	.	.	.	.	.	.	.	.	.	.	.	.	.	.	.	.	.	.	.	.	.	.	.
11	92534008	.	G	A	900.7	PASS	1	763	1	FAT3	nonsynonymous SNV	.	.	.	.	.	.	.	.	.	.	.	.	.	.	.	.	.	.	.	.	.	.	.	.	.	.	.	.	.	.	.	.	.	.	.	.	.	.
11	92534332	.	C	G	226.4	PASS	1	1236	1	FAT3	nonsynonymous SNV	.	.	.	.	.	.	.	.	.	.	.	.	.	.	.	.	.	.	.	.	.	.	.	.	.	.	.	.	.	.	.	.	.	.	.	.	.	.
11	92538454	rs112113306	C	T	396.6	PASS	1	4173863	1	FAT3	nonsynonymous SNV	.	.	.	.	.	.	.	0.001	.	0.0043	.	0.002	.	0.0004	0.0003	0.0003	0	0	0.0006	0	0	0.0005	0.0003	0.0006	.	.	0.0004	0.0002	0.0003	0	0	0	0.0008	0.0004	0	0.0006	0.0001	0
11	92569867	rs200404766	C	T	3206.8	PASS	3	338;475;4148771	1,1,1	FAT3	nonsynonymous SNV	COSM4037590;COSM4037591	1(haematopoietic_and_lymphoid_tissue);1(stomach);1(large_intestine)	.	.	.	.	.	0.0002	0.0008	.	.	.	.	0.0022	0.0006	0.0008	0.0001	0.0033	0.0032	0.0011	0.001	0.0018	.	0.0026	.	.	0.0019	0.0007	0.0005	0.001	5.82e-05	0.0036	0.0028	0.002	0.0011	0.0019	0.0003	0.0024
11	92573727	.	G	A	1205.4	PASS	1	351	1	FAT3	splice_acceptor
11	92577352	rs200032318	G	A	4405.3	PASS	5	296;385;4110378;4133511;4137230	1,1,1,1,1	FAT3	nonsynonymous SNV	COSM1717646;COSM1717647;COSM1717648	3(haematopoietic_and_lymphoid_tissue)	.	.	.	.	.	0.0008	.	0.0014	.	0.002	0.001	0.0021	0.0019	0.0006	0.0001	0.0005	0.0033	0	0.0002	0.004	0.0021	0.005	.	.	0.0023	0.0016	0.0009	0.0004	0.0001	0.0014	0.004	0.0015	0.0002	0.0029	0.0014	0.0012
11	92600166	.	C	T	331.1	PASS	1	1432	1	FAT3	nonsynonymous SNV	.	.	.	.	.	.	.	.	.	.	.	.	.	.	.	.	.	.	.	.	.	.	.	.	.	.	.	.	.	.	.	.	.	.	.	.	.	.
11	92613978	rs201379307	G	A	428.2	PASS	3	4119027;4144951;4171946	1,1,1	FAT3	nonsynonymous SNV	.	.	.	.	.	.	.	0.0004	0.0008	.	.	0.001	.	0.0006	0.0004	8.64e-05	0.001	0.0003	0.0008	0.0022	0.0002	0.0004	0.0005	0.0004	.	.	0.0007	0.0003	8.94e-05	0	0.0009	0.0002	0.0012	0.0009	0.0004	0.001	0.0007	0.0012
11	92616305	rs1440801357	C	T	317.2	PASS	1	4177434	1	FAT3	nonsynonymous SNV	COSM5655296;COSM5655297;COSM5655295	2(haematopoietic_and_lymphoid_tissue)	.	.	.	.	.	.	.	.	.	.	.	.	.	.	.	.	.	.	.	.	.	.	.	.	0	0	0	0	0	0	0	0	0	.	.	.
11	92622404	.	A	G	805.1	PASS	1	4139483	1	FAT3	nonsynonymous SNV
11	92622409	.	A	G	403.8	PASS	1	474	1	FAT3	nonsynonymous SNV
11	92623839	.	G	C	411.3	PASS	1	824	1	FAT3	nonsynonymous SNV	.	.	.	.	.	.	.	.	.	.	.	.	.	.	.	.	.	.	.	.	.	.	.	.	.	.	.	.	.	.	.	.	.	.	.	.	.	.
11	94209552	.	T	C	370	PASS	1	1464	1	MRE11A	nonsynonymous SNV	.	.	.	.	.	.	.	.	.	.	.	.	.	.	.	.	.	.	.	.	.	.	.	.	.	.	.	.	.	.	.	.	.	.	.	.	.	.
11	95825609	.	A	G	558.2	PASS	1	1338	1	MAML2	nonsynonymous SNV	.	.	.	.	.	.	.	.	.	.	.	.	.	.	.	.	.	.	.	.	.	.	.	.	.	.	.	.	.	.	.	.	.	.	.	.	.	.
11	95826052	rs201509772	C	A	342.3	PASS	1	4167381	1	MAML2	nonsynonymous SNV	.	.	.	.	.	.	.	0.0002	.	.	.	.	0.001	0.0008	0.0001	0	0	0.0002	0.001	0.0025	0.0021	0.0009	.	0.0013	.	.	0.0007	6.74e-05	6.11e-05	0	0	0.0003	0.0009	0.001	0.0019	0.0003	0.0001	0.0012
11	96074983	rs200971316	C	G	214.5	PASS	4	4103570;4113191;4124188;4125240	1,1,1,1	MAML2	nonsynonymous SNV	COSM4654588	1(large_intestine)	.	.	.	.	.	0.0004	.	.	.	0.002	.	0.0029	0.0003	0.0007	0	0.0016	0.0046	0	0.0016	0.0012	0.0003	0.0017	.	.	0.0018	0.0003	0.0005	0.0028	0	0.001	0.003	0.0012	0.0012	0.0017	0.0008	0
11	108106417	.	C	T	488.4	PASS	1	4110120	1	ATM	stopgain	.	.	.	.	.	.	.	.	.	.	.	.	.	.	.	.	.	.	.	.	.	.	.	.	.	.	.	.	.	.	.	.	.	.	.	.	.	.
11	108115566	.	CT	C	281.2	PASS	1	1078	1	ATM	frameshift deletion
11	108119823	rs56128736	T	C	980.7	PASS	10	039;052;111;1165;1319;324;831;1056;4103141;4148771	1,1,1,1,1,1,1,1,1,1	ATM	nonsynonymous SNV	COSM21825	3(NS);3(haematopoietic_and_lymphoid_tissue)	other|Benign|other	Hereditary_cancer-predisposing_syndrome|Ataxia-telangiectasia_syndrome|not_specified	RCV000115136.7|RCV000119195.7|RCV000120171.3	MedGen:SNOMED_CT|MedGen:OMIM:Orphanet:SNOMED_CT|MedGen	C0027672:699346009|C0004135:208900:ORPHA100:68504005|CN169374	0.0008	.	0.0014	.	0.003	.	0.0022	0.0007	0.0031	0	0.0002	0.0033	0	0	0.0018	0.0009	0.0022	.	.	0.0022	0.0009	0.003	0.0042	0	8.98e-05	0.0033	0.0024	0	0.0013	0.0006	0.0048
11	108121787	rs35963548	G	A	291.9	PASS	1	519	1	ATM	nonsynonymous SNV	.	.	Uncertain significance|Uncertain significance|Uncertain significance	not_specified|Ataxia-telangiectasia_syndrome|Hereditary_cancer-predisposing_syndrome	RCV000120116.2|RCV000122821.6|RCV000129230.5	MedGen|MedGen:OMIM:Orphanet:SNOMED_CT|MedGen:SNOMED_CT	CN169374|C0004135:208900:ORPHA100:68504005|C0027672:699346009	0.0002	.	0.0014	.	.	.	0.0002	0	0.0014	0	0	0.0001	0	0	0.0001	.	0.0001	.	.	0.0003	6.54e-05	0.0008	0	0	0	0.0002	0.0018	0	0.0001	0.0001	0
11	108128246	rs34231402	T	A	759.4	PASS	2	135;1464	1,1	ATM	nonsynonymous SNV	.	.	Likely benign|Likely benign|Uncertain significance	Hereditary_cancer-predisposing_syndrome|Ataxia-telangiectasia_syndrome|not_specified	RCV000115152.6|RCV000122834.6|RCV000211979.3	MedGen:SNOMED_CT|MedGen:OMIM:Orphanet:SNOMED_CT|MedGen	C0027672:699346009|C0004135:208900:ORPHA100:68504005|CN169374	0.0012	0.0045	.	.	.	.	0.0005	0.0019	0.001	0	0	0.0004	0.0033	0	0.0005	0.0014	.	.	.	0.0007	0.002	0.0018	0.0012	0	0	0.0004	0.0026	0	0.0006	0.0013	0.0024
11	108141789	rs1060501703	A	G	154	PASS	1	155	1	ATM	splice_acceptor
11	108143329	.	C	T	355	PASS	1	4145528	1	ATM	nonsynonymous SNV	.	.	.	.	.	.	.	.	.	.	.	.	.	.	.	.	.	.	.	.	.	.	.	.	.	.	.	.	.	.	.	.	.	.	.	.	.	.
11	108159720	.	C	T	691.3	PASS	1	1344	1	ATM	nonsynonymous SNV	.	.	.	.	.	.	.	.	.	.	.	.	.	.	.	.	.	.	.	.	.	.	.	.	.	.	.	.	.	.	.	.	.	.	.	.	.	.
11	108160480	rs138327406	T	G	869.2	PASS	1	4152611	1	ATM	nonsynonymous SNV	COSM5020989;COSM5020988	1(soft_tissue)	other|other|Benign	Hereditary_cancer-predisposing_syndrome|not_specified|Ataxia-telangiectasia_syndrome	RCV000115193.7|RCV000120139.4|RCV000122848.6	MedGen:SNOMED_CT|MedGen|MedGen:OMIM:Orphanet:SNOMED_CT	C0027672:699346009|CN169374|C0004135:208900:ORPHA100:68504005	0.0004	.	0.0014	.	0.001	.	0.0014	0.0002	0.0011	0	0	0.0023	0	0	0.0012	0.0002	0.0016	.	.	0.0016	0.0004	0.001	0.027	0	0	0.0005	0.0038	0	0.0005	0.0002	0
11	108186610	rs11212587	G	A	533.3	PASS	4	887;125;4170844;4183924	1,1,1,1	ATM	nonsynonymous SNV	COSM24635	2(haematopoietic_and_lymphoid_tissue)	Likely benign|other|Likely benign	Hereditary_cancer-predisposing_syndrome|not_specified|Ataxia-telangiectasia_syndrome	RCV000115221.7|RCV000120151.3|RCV000122864.6	MedGen:SNOMED_CT|MedGen|MedGen:OMIM:Orphanet:SNOMED_CT	C0027672:699346009|CN169374|C0004135:208900:ORPHA100:68504005	0.0012	.	0.0029	0.001	0.003	.	0.0016	0.0004	0.0013	0	0.0012	0.0023	0.0022	0.0004	0.0023	0.0007	0.0031	.	.	0.0015	0.0003	0.001	0.0001	5.8e-05	0.0009	0.0025	0.0011	0.0006	0.0011	0.0006	0.0024
11	108196075	.	A	T	447.1	PASS	1	1416	1	ATM	nonsynonymous SNV	.	.	.	.	.	.	.	.	.	.	.	.	.	.	.	.	.	.	.	.	.	.	.	.	.	.	.	.	.	.	.	.	.	.	.	.	.	.
11	108205787	rs1064793406	TAA	T	261.9	PASS	1	188	1	ATM	frameshift deletion
11	108235906	.	C	T	207.4	PASS	1	1581	1	ATM	nonsynonymous SNV	.	.	.	.	.	.	.	.	.	.	.	.	.	.	.	.	.	.	.	.	.	.	.	.	.	.	.	.	.	.	.	.	.	.	.	.	.	.
11	108236070	.	CAACAAAGTAGCTGAACGTGTCTTAATGA	C	191.4	PASS	1	1416	1	ATM	frameshift deletion
11	108536011	rs149622934	C	G	589.4	PASS	3	1298;177;4184011	1,1,1	DDX10	nonsynonymous SNV	.	.	.	.	.	.	.	0.0006	0.0008	.	.	0.002	.	0.002	0.0006	0.0011	0	0.0017	0.0032	0.0011	6.19e-05	0.0014	0.0005	0.0019	.	0.016	0.0021	0.0006	0.001	0.0155	0	0.0018	0.0024	0.0031	6.75e-05	0.0026	0.0002	0
11	108550250	rs142321169	C	G	1049.7	PASS	2	778;4179976	1,1	DDX10	nonsynonymous SNV	.	.	.	.	.	.	.	0.0002	0.0008	.	.	.	.	0.0005	9.72e-05	0.0007	0	0.0002	0.0008	0	0	0.0005	.	0.0007	.	.	0.0005	6.56e-05	0.0006	0	0	4.49e-05	0.0009	0.0002	3.33e-05	0.0007	0.0005	0
11	108550284	.	A	G	501.7	PASS	1	472	1	DDX10	nonsynonymous SNV	.	.	.	.	.	.	.	.	.	.	.	.	.	.	.	.	.	.	.	.	.	.	.	.	.	.	.	.	.	.	.	.	.	.	.	.	.	.
11	108709186	rs138955971	C	T	635.6	PASS	1	4136095	1	DDX10	nonsynonymous SNV	.	.	.	.	.	.	.	0.0004	.	.	.	.	0.002	0.0004	0	0	0	0	0.0006	0.0023	0.0006	0.0003	0.0002	0.0003	.	.	0.0004	0	0.0002	0.0019	0	0	0.0005	0.0018	0.0007	9.69e-05	0	0
11	108712161	rs147274149	T	G	814	PASS	1	5	1	DDX10	nonsynonymous SNV	.	.	.	.	.	.	.	0.0002	0.0008	.	.	.	.	0.0001	9.63e-05	0.0003	0	0.0002	0.0002	0	0	0.0001	.	0.0001	.	.	0.0001	0.0001	8.94e-05	0	0	4.49e-05	0.0002	0.0004	0	0.0002	0	0.0024
11	117015018	rs1226648766	G	T	233.9	PASS	1	4144633	1	PAFAH1B2	nonsynonymous SNV
11	118342679	.	A	G	375.8	PASS	1	4116268	1	KMT2A	nonsynonymous SNV	.	.	.	.	.	.	.	.	.	.	.	.	.	.	.	.	.	.	.	.	.	.	.	.	.	.	.	.	.	.	.	.	.	.	.	.	.	.
11	118344839	rs139989306	C	T	690.9	PASS	2	733;4177987	1,1	KMT2A	nonsynonymous SNV	.	.	.	.	.	.	.	0.0002	.	.	.	0.001	.	0.0009	0.0003	0	0	0.0006	0.0015	0	0	0.0011	0.0002	0.0015	.	.	0.001	0.0004	0.0002	0.0072	0	0.0004	0.0013	0.0011	0	0.001	0.0002	0
11	118352500	.	G	T	491.7	PASS	1	1534	1	KMT2A	nonsynonymous SNV	.	.	.	.	.	.	.	.	.	.	.	.	.	.	.	.	.	.	.	.	.	.	.	.	.	.	.	.	.	.	.	.	.	.	.	.	.	.
11	118352798	.	C	T	148.6	PASS	1	18	1	KMT2A	nonsynonymous SNV	.	.	.	.	.	.	.	.	.	.	.	.	.	.	.	.	.	.	.	.	.	.	.	.	.	.	.	.	.	.	.	.	.	.	.	.	.	.
11	118354908	.	C	T	999.9	PASS	1	795	1	KMT2A	nonsynonymous SNV	.	.	.	.	.	.	.	.	.	.	.	.	.	.	.	.	.	.	.	.	.	.	.	.	.	.	.	.	.	.	.	.	.	.	.	.	.	.
11	118362528	rs143317202	G	A	356.1	PASS	1	4174905	1	KMT2A	nonsynonymous SNV	.	.	.	.	.	.	.	0.0002	.	.	.	0.001	.	0.0001	0	0.0005	0	0	8.99e-05	0	6.06e-05	0.0002	.	0.0002	.	.	0.0001	0	0.0003	0	0	0	0.0001	0	3.25e-05	6.46e-05	0.0001	0
11	118366570	.	C	T	561.5	PASS	1	4131095	1	KMT2A	nonsynonymous SNV	.	.	.	.	.	.	.	.	.	.	.	.	.	.	.	.	.	.	.	.	.	.	.	.	.	.	.	.	.	.	.	.	.	.	.	.	.	.
11	118376329	.	G	C	928.1	PASS	1	90	1	KMT2A	nonsynonymous SNV	.	.	.	.	.	.	.	.	.	.	.	.	.	.	.	.	.	.	.	.	.	.	.	.	.	.	.	.	.	.	.	.	.	.	.	.	.	.
11	118771588	rs1328845797	G	A	301.9	PASS	1	4161781	1	BCL9L	nonsynonymous SNV	.	.	.	.	.	.	.	.	.	.	.	.	.	.	.	.	.	.	.	.	.	.	.	.	.	.	.	.	.	.	.	.	.	.	.	.	.	.
11	118771714	rs574321228	C	T	370	PASS	1	1290	1	BCL9L	nonsynonymous SNV	.	.	.	.	.	.	.	0.0002	.	.	.	.	0.001	1.81e-05	0	0	0	0	1.56e-05	0	0.0001	.	.	.	.	.	1.5e-05	0	0	0	0	0	1.08e-05	0	0.0001	.	.	.
11	118771957	rs183804575	G	A	589.3	PASS	2	1343;788	1,1	BCL9L	nonsynonymous SNV	.	.	.	.	.	.	.	0.0006	.	0.0043	.	.	.	7.42e-05	9.62e-05	0.0006	0	0	1.5e-05	0	0	.	.	.	.	.	0.0001	0.0001	0.0006	0	0	0	3.58e-05	0	0	9.74e-05	0.0002	0
11	118772287	rs144029087	A	G	1073.2	PASS	1	874	1	BCL9L	nonsynonymous SNV	.	.	.	.	.	.	.	0.0006	.	.	.	0.003	.	0.0009	0.0003	0.0011	0	0.0002	0.0014	0	6.06e-05	0.0016	0.0016	0.0016	.	0.0082	0.001	0.0002	0.0011	0.0029	0	8.98e-05	0.0016	0.0018	3.25e-05	0.0007	0.0006	0.0024
11	118772401	.	A	G	143.6	PASS	1	4109808	1	BCL9L	nonsynonymous SNV	.	.	.	.	.	.	.	.	.	.	.	.	.	.	.	.	.	.	.	.	.	.	.	.	.	.	.	.	.	.	.	.	.	.	.	.	.	.
11	118851324	.	C	A	245.2	PASS	1	186	1	FOXR1	nonsynonymous SNV	.	.	.	.	.	.	.	.	.	.	.	.	.	.	.	.	.	.	.	.	.	.	.	.	.	.	.	.	.	.	.	.	.	.	.	.	.	.
11	120298916	rs147982337	C	T	450.2	PASS	1	4199714	1	ARHGEF12	nonsynonymous SNV	.	.	.	.	.	.	.	0.001	.	.	.	0.003	0.002	0.0017	0.0002	0.0008	0	0.0006	0.0023	0	0.0021	0.0017	.	0.0024	0.011	.	0.0015	0.0001	0.0008	0	0	0.0008	0.0023	0.0015	0.0019	0.0013	0.0007	0
11	120317731	rs138160103	G	A	714.8	PASS	1	727	1	ARHGEF12	nonsynonymous SNV	.	.	.	.	.	.	.	0.0008	.	.	.	0.003	0.001	0.0019	0.0001	0.0003	0.0001	0.0005	0.003	0.0011	0.0009	0.0016	0.0005	0.0022	.	.	0.0016	0.0001	0.0002	0.0003	5.8e-05	0.0009	0.0029	0.0007	0.0012	0.0011	0.0003	0
11	120339997	rs926350763	A	C	240.9	PASS	1	770	1	ARHGEF12	nonsynonymous SNV	.	.	.	.	.	.	.	.	.	.	.	.	.	.	.	.	.	.	.	.	.	.	.	.	.	.	.	.	.	.	.	.	.	.	.	.	.	.
11	120351131	rs202128571	G	A	656.7	PASS	1	352	1	ARHGEF12	nonsynonymous SNV	.	.	.	.	.	.	.	0.0002	.	0.0014	.	.	.	0.0001	0	8.71e-05	0	0.0003	0.0002	0	0	.	.	.	.	.	0.0001	6.58e-05	0	0	0	0.0004	0.0001	0.0002	0	0.0002	0	0
11	120352041	.	T	C	544.8	PASS	1	199	1	ARHGEF12	nonsynonymous SNV	.	.	.	.	.	.	.	.	.	.	.	.	.	.	.	.	.	.	.	.	.	.	.	.	.	.	.	.	.	.	.	.	.	.	.	.	.	.
11	120352133	rs1223461838	T	C	476.6	PASS	1	4115001	1	ARHGEF12	nonsynonymous SNV	.	.	.	.	.	.	.	.	.	.	.	.	.	.	.	.	.	.	.	.	.	.	.	.	.	.	.	.	.	.	.	.	.	.	.	.	.	.
11	128359269	rs79963544	C	T	816.5	PASS	8	117;137;4108101;4130003;4164943;4171586;4176325;4191799	1,1,1,1,1,1,1,1	ETS1	nonsynonymous SNV	COSM1492496;COSM310945	1(kidney);1(lung)	.	.	.	.	.	0.0008	.	0.0014	.	0.003	.	0.0023	0.0007	0.001	0.0001	0.0005	0.0036	0.0044	0.0007	0.003	0.0005	0.0043	.	.	0.0021	0.0006	0.0009	0.0001	5.8e-05	0.0004	0.0039	0.002	0.0008	0.002	0.0009	0.0012
11	128651868	.	A	G	3162.4	PASS	1	158	1	FLI1	nonsynonymous SNV	.	.	.	.	.	.	.	.	.	.	.	.	.	.	.	.	.	.	.	.	.	.	.	.	.	.	.	.	.	.	.	.	.	.	.	.	.	.
12	406289	.	CT	C	1311.9	PASS	1	12	1	KDM5A	frameshift deletion
12	427428	rs373590748	G	A	992.6	PASS	1	850	1	KDM5A	nonsynonymous SNV	.	.	.	.	.	.	.	0.0002	0.0008	.	.	.	.	4.97e-05	0.0006	0	0	0	0	0	0	0.0002	0.0005	.	0.011	.	3.25e-05	0.0005	0	0	0	0	0	0	0	0.0001	0.0005	0
12	461384	rs201675393	T	C	1877.7	PASS	4	141;1468;330;365	1,1,1,1	KDM5A	nonsynonymous SNV	.	.	.	.	.	.	.	0.0002	.	.	.	.	0.001	0.0009	0.0001	0.0002	0	0.0011	0.0014	0.0011	0.0005	0.0009	0.0003	0.0012	.	.	0.001	0.0001	0.0003	0.0001	0	0.0007	0.0017	0.0007	0.0006	0.0008	0.0002	0.0012
12	1553736	.	G	GC	634.5	PASS	1	1452	1	ERC1	frameshift insertion
12	4385357	.	G	A	143.1	PASS	1	175	1	CCND2	nonsynonymous SNV	COSM5551557	1(prostate)	.	.	.	.	.	.	.	.	.	.	.	.	.	.	.	.	.	.	.	.	.	.	.	.	.	.	.	.	.	.	.	.	.	.	.	.
12	7061285	.	G	A	194.1	PASS	1	149	1	PTPN6	nonsynonymous SNV	.	.	.	.	.	.	.	.	.	.	.	.	.	.	.	.	.	.	.	.	.	.	.	.	.	.	.	.	.	.	.	.	.	.	.	.	.	.
12	7064576	rs201345298	C	A	404.7	PASS	1	179	1	PTPN6	nonsynonymous SNV	.	.	.	.	.	.	.	0.0002	.	0.0014	.	.	.	0.0004	0	0.0008	0	0.0002	0.0006	0	0	0.0006	.	0.001	.	.	0.0004	0	0.0007	0	0	8.97e-05	0.0006	0.0002	0	0.0003	0.0001	0.0024
12	7067226	rs62621988	G	A	274.8	PASS	1	343	1	PTPN6	nonsynonymous SNV	.	.	.	.	.	.	.	0.0002	.	.	.	0.001	.	0.0008	0.0002	0.001	0	0.0003	0.0012	0.0023	0	0.0011	0.0005	0.0014	.	.	0.0008	0.0001	0.0005	0	0	0.0003	0.0014	0.0011	3.25e-05	0.0006	0.0003	0
12	12022810	.	C	G	1096.4	PASS	1	733	1	ETV6	nonsynonymous SNV	.	.	.	.	.	.	.	.	.	.	.	.	.	.	.	.	.	.	.	.	.	.	.	.	.	.	.	.	.	.	.	.	.	.	.	.	.	.
12	12871180	rs546234840	A	G	187.4	PASS	1	273	1	CDKN1B	nonsynonymous SNV	COSM2227662	1(upper_aerodigestive_tract)	Likely benign|Uncertain significance	Multiple_endocrine_neoplasia|Multiple_endocrine_neoplasia\x2c_type_4	RCV000346316.1|RCV000475865.1	MedGen:Orphanet:SNOMED_CT|MedGen:OMIM:Orphanet	C0027662:ORPHA276161:46724008|C1970712:610755:ORPHA276152	0.0002	.	0.0014	.	.	.	0.0001	0	0.0002	0	0	0.0002	0	0	.	.	.	.	.	7.43e-05	0	8.96e-05	0	0	0	0.0001	0	0	0.0001	0	0.0012
12	22814013	.	C	T	1534.1	PASS	1	345	1	ETNK1	nonsynonymous SNV	.	.	.	.	.	.	.	.	.	.	.	.	.	.	.	.	.	.	.	.	.	.	.	.	.	.	.	.	.	.	.	.	.	.	.	.	.	.
12	25368451	rs368557003	T	C	1397	PASS	1	442	1	KRAS	nonsynonymous SNV	.	.	.	.	.	.	.	.	.	.	.	.	.	.	.	.	.	.	.	.	.	0.0001	.	0.0001	.	.	.	.	.	.	.	.	.	.	.	.	.	.
12	27803022	.	C	T	356.2	PASS	1	1543	1	PPFIBP1	nonsynonymous SNV	.	.	.	.	.	.	.	.	.	.	.	.	.	.	.	.	.	.	.	.	.	.	.	.	.	.	.	.	.	.	.	.	.	.	.	.	.	.
12	27832479	.	C	T	294.6	PASS	1	4103593	1	PPFIBP1	nonsynonymous SNV	.	.	.	.	.	.	.	.	.	.	.	.	.	.	.	.	.	.	.	.	.	.	.	.	.	.	.	.	.	.	.	.	.	.	.	.	.	.
12	27841260	rs138941072	G	C	3710.3	PASS	1	725	1	PPFIBP1	nonsynonymous SNV	.	.	.	.	.	.	.	0.0006	.	.	.	0.003	.	0.0019	0.001	0.0021	0	0.0002	0.0029	0	6.06e-05	0.0019	0.0005	0.0027	.	.	0.0018	0.0008	0.0019	0	0	0.0002	0.0031	0.0026	0.0001	0.0017	0.0008	0.0012
12	27841297	rs1212882704	G	A	1259.4	PASS	1	184	1	PPFIBP1	nonsynonymous SNV	.	.	.	.	.	.	.	.	.	.	.	.	.	.	.	.	.	.	.	.	.	.	.	.	.	.	.	.	.	.	.	.	.	.	.	.	.	.
12	46205208	rs140285438	G	A	530.1	PASS	3	383;723;885	1,1,1	ARID2	nonsynonymous SNV	.	.	not provided	not_specified	RCV000120087.1	MedGen	CN169374	0.0004	.	0.0014	.	0.001	.	0.0003	9.63e-05	0.0007	0	0	0.0004	0	0	0.0006	.	0.0009	.	.	0.0003	6.56e-05	0.0006	0	0	0	0.0005	0.0007	0	0.0002	0.0001	0.0012
12	46205284	.	C	A	567	PASS	1	756	1	ARID2	nonsynonymous SNV	.	.	.	.	.	.	.	.	.	.	.	.	.	.	.	.	.	.	.	.	.	.	.	.	.	.	.	.	.	.	.	.	.	.	.	.	.	.
12	46244152	rs138384363	C	T	313.1	PASS	1	1237	1	ARID2	nonsynonymous SNV	.	.	.	.	.	.	.	0.0004	.	.	.	0.002	.	0.0002	0.0002	8.67e-05	0	0	0.0004	0	6.06e-05	0.0006	0.0007	0.0006	.	.	0.0003	0.0003	0.0005	0	0	0	0.0004	0.0004	3.25e-05	0.0001	0	0.0012
12	46244160	rs376582344	C	A	458.2	PASS	1	1423	1	ARID2	nonsynonymous SNV	.	.	.	.	.	.	.	.	.	.	.	.	.	.	.	.	.	.	.	.	.	0.0001	.	0.0001	.	.	.	.	.	.	.	.	.	.	.	.	.	.
12	46287238	rs201845936	G	A	306.9	PASS	1	1432	1	ARID2	nonsynonymous SNV	.	.	.	.	.	.	.	0.0002	.	0.0014	.	.	.	8.37e-06	0	0	0	0	1.53e-05	0	0	0.0001	.	0.0001	.	.	1.63e-05	0	2.98e-05	0	0	0	2.69e-05	0	0	3.23e-05	0	0
12	46298141	.	TG	T	517	PASS	1	4107990	1	ARID2	frameshift deletion
12	48368604	.	C	A	741.1	PASS	1	784	1	COL2A1	nonsynonymous SNV	.	.	.	.	.	.	.	.	.	.	.	.	.	.	.	.	.	.	.	.	.	.	.	.	.	.	.	.	.	.	.	.	.	.	.	.	.	.
12	48391456	.	G	C	356.5	PASS	1	141	1	COL2A1	nonsynonymous SNV	.	.	.	.	.	.	.	.	.	.	.	.	.	.	.	.	.	.	.	.	.	.	.	.	.	.	.	.	.	.	.	.	.	.	.	.	.	.
12	49424797	rs1290937992	G	A	866.1	PASS	1	878	1	KMT2D	nonsynonymous SNV	.	.	.	.	.	.	.	.	.	.	.	.	.	.	.	.	.	.	.	.	.	.	.	.	.	.	.	.	.	.	.	.	.	.	.	.	.	.
12	49425230	rs199797812	G	A	664.1	PASS	1	4175941	1	KMT2D	nonsynonymous SNV	COSM1361974;COSM1361975	2(upper_aerodigestive_tract);1(large_intestine)	.	.	.	.	.	0.0002	.	.	0.001	.	.	5.92e-05	0	0	0.0007	0	1.53e-05	0	0	.	.	.	.	.	4.48e-05	0	5.96e-05	0	0.0005	0	8.98e-06	0	0	3.23e-05	0	0
12	49426003	rs201078160	C	T	.	PASS	1	797	1	KMT2D	nonsynonymous SNV	.	.	.	.	.	.	.	0.0002	.	0.0014	.	.	.	0.0001	0	8.65e-05	0.0007	0	7.57e-05	0	0	0.0002	.	0.0002	.	.	0.0001	0	8.94e-05	0	0.0011	0	9e-05	0.0005	0	0.0002	0	0
12	49428231	.	G	C	276.6	PASS	1	4120468	1	KMT2D	nonsynonymous SNV	.	.	.	.	.	.	.	.	.	.	.	.	.	.	.	.	.	.	.	.	.	.	.	.	.	.	.	.	.	.	.	.	.	.	.	.	.	.
12	49428694	rs146044282	T	C	3521.5	PASS	7	011;054;117;1313;152;372;4145177	1,1,1,1,1,1,1	KMT2D	nonsynonymous SNV	.	.	other|Likely benign	not_specified|Kabuki_syndrome	RCV000121420.3|RCV000297958.1	MedGen|MedGen:Orphanet:SNOMED_CT	CN169374|C0796004:ORPHA2322:313426007	0.0004	.	.	.	0.001	0.001	0.0018	0.0003	0.0007	0	0.0023	0.0025	0.0045	0.0012	0.0015	0.0008	0.0018	.	.	0.0016	0.0005	0.0009	0.0001	5.8e-05	0.0016	0.0024	0.002	0.0014	0.0015	0.0002	0.0024
12	49431133	.	C	T	142.2	PASS	1	83	1	KMT2D	nonsynonymous SNV	.	.	.	.	.	.	.	.	.	.	.	.	.	.	.	.	.	.	.	.	.	.	.	.	.	.	.	.	.	.	.	.	.	.	.	.	.	.
12	49431926	.	C	A	1619.8	PASS	1	510	1	KMT2D	nonsynonymous SNV	.	.	.	.	.	.	.	.	.	.	.	.	.	.	.	.	.	.	.	.	.	.	.	.	.	.	.	.	.	.	.	.	.	.	.	.	.	.
12	49433607	.	C	T	1080.9	PASS	1	361	1	KMT2D	nonsynonymous SNV	.	.	.	.	.	.	.	.	.	.	.	.	.	.	.	.	.	.	.	.	.	.	.	.	.	.	.	.	.	.	.	.	.	.	.	.	.	.
12	49434957	.	T	C	334.4	PASS	1	4142605	1	KMT2D	nonsynonymous SNV	.	.	.	.	.	.	.	.	.	.	.	.	.	.	.	.	.	.	.	.	.	.	.	.	.	.	.	.	.	.	.	.	.	.	.	.	.	.
12	49439938	.	C	T	524.3	PASS	1	185	1	KMT2D	nonsynonymous SNV	.	.	.	.	.	.	.	.	.	.	.	.	.	.	.	.	.	.	.	.	.	.	.	.	.	.	.	.	.	.	.	.	.	.	.	.	.	.
12	49443551	.	C	A	1648.1	PASS	1	689	1	KMT2D	nonsynonymous SNV	.	.	.	.	.	.	.	.	.	.	.	.	.	.	.	.	.	.	.	.	.	.	.	.	.	.	.	.	.	.	.	.	.	.	.	.	.	.
12	49443799	rs112236653	G	A	187.7	PASS	1	4104893	1	KMT2D	nonsynonymous SNV	.	.	Likely benign|Likely benign|Uncertain significance	not_specified|Kabuki_syndrome|not_provided	RCV000121382.2|RCV000279877.1|RCV000431106.1	MedGen|MedGen:Orphanet:SNOMED_CT|MedGen	CN169374|C0796004:ORPHA2322:313426007|CN221809	0.0004	.	.	.	0.001	0.001	0.0011	0.0001	0	0.0006	0.0002	0.0019	0	0.0001	0.0008	.	0.0012	.	.	0.001	6.56e-05	0.0001	0	0.0006	0.0003	0.0019	0.0007	0.0001	0.0005	0.0001	0
12	49448803	.	C	T	663.1	PASS	1	765	1	KMT2D	nonsynonymous SNV	.	.	.	.	.	.	.	.	.	.	.	.	.	.	.	.	.	.	.	.	.	.	.	.	.	.	.	.	.	.	.	.	.	.	.	.	.	.
12	50026641	rs199502695	C	T	651.2	PASS	4	008;1220;125;373	1,1,1,1	PRPF40B	nonsynonymous SNV	.	.	.	.	.	.	.	0.0002	.	0.0014	.	.	.	9.06e-05	0	0.0007	0	0	4.5e-05	0	0	.	.	.	.	.	0.0002	0	0.0013	0	0	0	3.58e-05	0.0007	0	9.71e-05	0	0.0024
12	50027247	rs146358365	C	T	2873.5	PASS	1	464	1	PRPF40B	nonsynonymous SNV	.	.	.	.	.	.	.	0.0004	.	.	.	0.001	0.001	0.0004	9.65e-05	0.0002	0	0	0.0004	0.0011	0.0007	0.0004	0.0002	0.0005	.	.	0.0004	0.0002	0.0003	0	0	0	0.0006	0.0004	0.0006	0.0007	0.0003	0
12	50028330	.	T	C	605.2	PASS	1	841	1	PRPF40B	nonsynonymous SNV	.	.	.	.	.	.	.	.	.	.	.	.	.	.	.	.	.	.	.	.	.	.	.	.	.	.	.	.	.	.	.	.	.	.	.	.	.	.
12	50036051	.	C	T	262.5	PASS	1	4199848	1	PRPF40B	nonsynonymous SNV	COSM241263	1(prostate)	.	.	.	.	.	.	.	.	.	.	.	.	.	.	.	.	.	.	.	.	.	.	.	.	.	.	.	.	.	.	.	.	.	.	.	.
12	51189710	.	A	G	620.3	PASS	1	142	1	ATF1	nonsynonymous SNV	.	.	.	.	.	.	.	.	.	.	.	.	.	.	.	.	.	.	.	.	.	.	.	.	.	.	.	.	.	.	.	.	.	.	.	.	.	.
12	51203291	rs146613889	G	A	412.4	PASS	1	52	1	ATF1	nonsynonymous SNV	COSM5005260	1(haematopoietic_and_lymphoid_tissue)	.	.	.	.	.	0.0002	.	0.0014	.	.	.	0.0001	0	0.0005	0	0	0.0001	0	0.0001	.	.	.	.	.	0.0001	0	0.0004	0.001	0	0	5.37e-05	0.0005	6.5e-05	0.0002	0.0002	0.0036
12	51208120	rs532503300	T	C	694.6	PASS	1	875	1	ATF1	nonsynonymous SNV	.	.	.	.	.	.	.	0.0002	.	.	.	.	0.001	0.0001	0	0	0	0	0.0002	0	0.0002	.	.	.	.	.	8.13e-05	0	2.98e-05	0	0	0	0.0001	0	9.75e-05	0.0001	0	0
12	54369154	.	G	T	821.5	PASS	1	338	1	HOXC11	nonsynonymous SNV	.	.	.	.	.	.	.	.	.	.	.	.	.	.	.	.	.	.	.	.	.	.	.	.	.	.	.	.	.	.	.	.	.	.	.	.	.	.
12	56480387	.	A	T	158	PASS	1	473	1	ERBB3	nonsynonymous SNV	.	.	.	.	.	.	.	.	.	.	.	.	.	.	.	.	.	.	.	.	.	.	.	.	.	.	.	.	.	.	.	.	.	.	.	.	.	.
12	56486575	rs12320176	A	G	316	PASS	1	4120193	1	ERBB3	nonsynonymous SNV	.	.	.	.	.	.	.	0.0008	0.003	.	.	.	.	0.0004	0.0037	8.64e-05	0	0	5.99e-05	0	0	0.0015	0.0043	.	.	.	0.0003	0.0039	0.0003	0	0	0	5.37e-05	0.0002	0	0.0014	0.0046	0
12	56493615	rs566285257	GAT	G	562.3	PASS	1	756	1	ERBB3	splice_acceptor
12	56495049	rs79759315	C	T	276.8	PASS	1	4157186	1	ERBB3	nonsynonymous SNV	.	.	.	.	.	.	.	0.0004	.	.	.	0.001	0.001	6.6e-05	0	0	0	0	1.5e-05	0	0.0004	.	.	.	.	.	5.69e-05	0	2.98e-05	0	0	0	8.96e-06	0	0.0004	3.23e-05	0	0
12	56495339	rs55699040	C	A	2559.1	PASS	4	1298;338;4128852;4158726	2,1,1,1	ERBB3	nonsynonymous SNV	.	.	.	.	.	.	.	0.0012	.	0.0043	.	0.003	.	0.0025	0.0008	0.0016	0	0.0003	0.004	0	6.06e-05	0.0039	0.0007	0.0056	.	0.016	0.0024	0.001	0.0011	0.001	0	0.0004	0.0045	0.002	3.25e-05	0.0024	0.0007	0.0012
12	56495469	.	T	C	427.4	PASS	1	4198478	1	ERBB3	nonsynonymous SNV	.	.	.	.	.	.	.	.	.	.	.	.	.	.	.	.	.	.	.	.	.	.	.	.	.	.	.	.	.	.	.	.	.	.	.	.	.	.
12	57000083	rs139817454	C	T	4141.4	PASS	8	1313;144;800;1423;4126692;4138885;4149246;4199996	1,1,1,1,1,1,1,1	BAZ2A	nonsynonymous SNV	COSM4043675;COSM4043676;COSM4043674	1(stomach)	.	.	.	.	.	0.0004	.	.	.	0.002	.	0.0013	0.0006	0.0012	0	0.0008	0.0019	0.0022	0.0002	0.0009	0.0005	0.0011	.	.	0.0012	0.0004	0.0012	0.0003	0	0.0006	0.0019	0.0016	0.0004	0.0009	0	0
12	57003547	rs200427331	G	A	253.2	PASS	1	4109956	1	BAZ2A	nonsynonymous SNV	.	.	.	.	.	.	.	0.0006	.	.	.	0.003	.	0.0003	0	0	0	0.0002	0.0005	0	0	0.0003	.	0.0005	.	.	0.0003	0.0003	0	0	0	4.49e-05	0.0006	0	0	0.0005	0.0005	0
12	57005810	.	A	C	616.7	PASS	2	751;1192	1,1	BAZ2A	nonsynonymous SNV	.	.	.	.	.	.	.	.	.	.	.	.	.	.	.	.	.	.	.	.	.	.	.	.	.	.	.	.	.	.	.	.	.	.	.	.	.	.
12	57006959	.	G	T	300.9	PASS	1	1297	1	BAZ2A	nonsynonymous SNV	.	.	.	.	.	.	.	.	.	.	.	.	.	.	.	.	.	.	.	.	.	.	.	.	.	.	.	.	.	.	.	.	.	.	.	.	.	.
12	57109814	.	G	A	564.2	PASS	1	1169	1	NACA	nonsynonymous SNV	.	.	.	.	.	.	.	.	.	.	.	.	.	.	.	.	.	.	.	.	.	.	.	.	.	.	.	.	.	.	.	.	.	.	.	.	.	.
12	57112947	rs746403095	G	T	225.9	PASS	1	1535	1	NACA	stopgain
12	57114979	.	G	A	138	PASS	1	766	1	NACA	nonsynonymous SNV	.	.	.	.	.	.	.	.	.	.	.	.	.	.	.	.	.	.	.	.	.	.	.	.	.	.	.	.	.	.	.	.	.	.	.	.	.	.
12	57859444	.	G	T	367.7	PASS	1	4190784	1	GLI1	nonsynonymous SNV	.	.	.	.	.	.	.	.	.	.	.	.	.	.	.	.	.	.	.	.	.	.	.	.	.	.	.	.	.	.	.	.	.	.	.	.	.	.
12	57859678	.	G	T	317.7	PASS	1	1360	1	GLI1	nonsynonymous SNV	.	.	.	.	.	.	.	.	.	.	.	.	.	.	.	.	.	.	.	.	.	.	.	.	.	.	.	.	.	.	.	.	.	.	.	.	.	.
12	57863483	.	T	C	640.3	PASS	1	4179976	1	GLI1	splice_donor
12	57864118	rs200306754	G	A	273.4	PASS	1	4190784	1	GLI1	nonsynonymous SNV	COSM3398928	1(central_nervous_system)	.	.	.	.	.	0.0006	.	.	0.003	.	.	0.0003	0.0002	0	0.0028	0	1.56e-05	0	0.0001	0.0002	0.0002	0.0001	.	.	0.0003	0.0002	0	0	0.0032	0	1.03e-05	0.0002	4.13e-05	0.0005	0.0001	0
12	57864873	.	C	T	254.4	PASS	1	4113825	1	GLI1	nonsynonymous SNV	.	.	.	.	.	.	.	.	.	.	.	.	.	.	.	.	.	.	.	.	.	.	.	.	.	.	.	.	.	.	.	.	.	.	.	.	.	.
12	57864923	.	C	G	2587.2	PASS	1	1309	2	GLI1	stopgain	.	.	.	.	.	.	.	.	.	.	.	.	.	.	.	.	.	.	.	.	.	.	.	.	.	.	.	.	.	.	.	.	.	.	.	.	.	.
12	57865189	.	C	A	366.9	PASS	1	125	1	GLI1	nonsynonymous SNV	.	.	.	.	.	.	.	.	.	.	.	.	.	.	.	.	.	.	.	.	.	.	.	.	.	.	.	.	.	.	.	.	.	.	.	.	.	.
12	57910920	.	G	A	565.1	PASS	1	4121974	1	DDIT3	nonsynonymous SNV	.	.	.	.	.	.	.	.	.	.	.	.	.	.	.	.	.	.	.	.	.	.	.	.	.	.	.	.	.	.	.	.	.	.	.	.	.	.
12	59274410	rs200549484	T	C	239.3	PASS	1	4144366	1	LRIG3	nonsynonymous SNV	.	.	.	.	.	.	.	0.0002	.	.	.	0.001	.	0.0002	9.62e-05	0	0	0.0002	0.0003	0	0	.	.	.	.	.	0.0002	0.0001	2.98e-05	0	0	4.49e-05	0.0003	0	0	0.0002	0.0002	0
12	59274506	rs142306271	C	T	403.6	PASS	1	869	1	LRIG3	nonsynonymous SNV	.	.	.	.	.	.	.	0.0002	0.0008	.	.	.	.	8.24e-06	9.61e-05	0	0	0	0	0	0	.	.	.	.	.	8.12e-06	6.53e-05	2.98e-05	0	0	0	0	0	0	6.46e-05	0.0001	0.0012
12	59280632	rs138577440	T	C	1035.5	PASS	2	1229;1263	1,1	LRIG3	nonsynonymous SNV	COSM5654246;COSM5654247	1(haematopoietic_and_lymphoid_tissue)	.	.	.	.	.	0.002	.	0.0029	.	0.004	0.0041	0.0015	0.0002	0.002	0	0	0.0012	0.0011	0.0046	0.0014	0.0011	0.0015	0.011	.	0.0017	0.0002	0.002	0.001	0	4.49e-05	0.0016	0.0018	0.0048	0.0008	0.0005	0.0012
12	59281583	rs201662008	C	T	553.5	PASS	2	175;4128849	1,1	LRIG3	nonsynonymous SNV	.	.	.	.	.	.	.	0.0002	.	.	.	0.001	.	0.0002	0	0.0003	0	0.0003	0.0003	0	6.07e-05	0.0003	.	0.0005	.	.	0.0003	0	0.0004	0	0	0.0004	0.0004	0.0004	3.25e-05	0.0002	0.0001	0
12	65445246	.	G	T	510.6	PASS	1	862	1	WIF1	stopgain	.	.	.	.	.	.	.	.	.	.	.	.	.	.	.	.	.	.	.	.	.	.	.	.	.	.	.	.	.	.	.	.	.	.	.	.	.	.
12	65514824	.	C	G	164.6	PASS	1	4145177	1	WIF1	nonsynonymous SNV	COSM5675129;COSM5675130	1(lung)	.	.	.	.	.	.	.	.	.	.	.	.	.	.	.	.	.	.	.	.	.	.	.	.	.	.	.	.	.	.	.	.	.	.	.	.
12	70949062	rs112145681	C	T	620.9	PASS	2	008;4128355	1,1	PTPRB	nonsynonymous SNV	.	.	.	.	.	.	.	0.001	.	0.0014	.	0.003	0.001	0.0007	0	0.0007	0.0001	0.0016	0.0008	0.0024	0.0002	0.0005	.	0.0007	.	.	0.0005	0	0.0007	0.0001	0.0002	0.0008	0.0007	0.0011	6.52e-05	0.0005	0.0003	0
12	70965009	rs149998223	G	A	2765.2	PASS	4	146;158;874;4139212	1,1,1,1	PTPRB	nonsynonymous SNV	.	.	.	.	.	.	.	0.0008	.	.	.	0.004	.	0.0014	0.0004	0.0036	0	0.0002	0.0018	0.0011	0	0.0015	0.0005	0.002	.	.	0.0014	0.0002	0.004	0	0	4.49e-05	0.0018	0.0027	0	0.0005	0.0001	0.0024
12	70965620	.	T	G	354.8	PASS	1	373	1	PTPRB	nonsynonymous SNV	.	.	.	.	.	.	.	.	.	.	.	.	.	.	.	.	.	.	.	.	.	.	.	.	.	.	.	.	.	.	.	.	.	.	.	.	.	.
12	70988331	.	G	T	1312	PASS	1	765	1	PTPRB	nonsynonymous SNV	.	.	.	.	.	.	.	.	.	.	.	.	.	.	.	.	.	.	.	.	.	.	.	.	.	.	.	.	.	.	.	.	.	.	.	.	.	.
12	95914962	rs144760209	T	C	511	PASS	2	4130865;4133263	1,1	USP44	nonsynonymous SNV	.	.	.	.	.	.	.	0.0002	.	.	.	0.001	.	0.0006	0	0	0	0.0012	0.001	0	0	0.0007	.	0.001	.	.	0.0006	6.53e-05	2.98e-05	0.0004	0	0.0011	0.001	0.0002	0	0.001	0	0
12	95918558	rs372529431	C	T	875.8	PASS	1	39	1	USP44	nonsynonymous SNV	COSM4045504	1(stomach)	.	.	.	.	.	0.0006	.	.	.	.	0.0031	0.0003	9.61e-05	0	0	0	9.02e-05	0	0.0016	.	.	.	.	.	0.0002	0.0002	0	0	0	0	0.0001	0.0002	0.0014	0.0003	0	0
12	95926643	rs568865924	C	T	480.6	PASS	1	272	1	USP44	nonsynonymous SNV	.	.	.	.	.	.	.	0.0002	.	.	.	.	0.001	0.0001	0	8.67e-05	0	0	1.52e-05	0	0.001	.	.	.	.	.	0.0001	0	0	0	0	0	9.37e-06	0	0.0009	3.23e-05	0	0
12	95926960	rs562591075	C	T	1074.1	PASS	1	38	1	USP44	nonsynonymous SNV	.	.	.	.	.	.	.	0.0002	.	.	.	.	0.001	8.24e-06	0	0	0	0	0	0	6.06e-05	.	.	.	.	.	4.06e-06	0	0	0	0	0	0	0	3.25e-05	.	.	.
12	95927735	rs187355417	G	A	341.9	PASS	1	4122063	1	USP44	nonsynonymous SNV	.	.	.	.	.	.	.	0.0004	.	0.0029	.	.	.	1.65e-05	0	0.0002	0	0	0	0	0	.	.	.	.	.	2.03e-05	6.53e-05	5.96e-05	0	5.8e-05	0	0	0	3.25e-05	.	.	.
12	95927782	rs141219097	T	C	594.4	PASS	1	4193638	1	USP44	nonsynonymous SNV	.	.	.	.	.	.	.	0.0002	.	.	.	0.001	.	0.0005	0	0.0002	0	0.0002	0.0009	0	0	0.0008	.	0.0012	.	.	0.0005	0	0.0003	0	0	4.48e-05	0.0009	0	0	0.0005	0.0002	0.0012
12	111856588	rs111360561	C	A	294	PASS	2	4109956;4141476	1,1	SH2B3	nonsynonymous SNV	COSM1685386	1(haematopoietic_and_lymphoid_tissue)	.	.	.	.	.	0.0002	.	0.0014	.	.	.	0.0002	0	0	0	0	0.0007	0	0	.	.	.	.	.	0.0007	0	0.0015	0	0	0	0.001	0.0011	0	0.0005	0.0003	0.0012
12	111885304	rs559278672	C	T	549.6	PASS	1	1317	1	SH2B3	nonsynonymous SNV	COSM5215947;COSM430330	1(breast)	.	.	.	.	.	0.0002	.	.	.	0.001	.	0.0001	0	0.0002	0.0002	0	0.0001	0	6.09e-05	.	.	.	.	.	6.59e-05	0	0.0001	0	0.0002	0	6.41e-05	0	3.26e-05	3.29e-05	0	0.0012
12	111885815	rs537932422	CTCCCTTCCTCACTGGGATTCAGAG	C	408.6	PASS	2	1339;4138527	1,1	SH2B3	nonframeshift deletion	.	.	.	.	.	.	.	.	.	.	.	.	.	0.0014	9.63e-05	0.0004	0	0.0014	0.0015	0.0011	0.0031	.	.	.	.	.	0.001	0.0002	0.0003	0	5.8e-05	0.001	0.0012	0.0009	0.0026	0.0005	0	0.0012
12	113532882	.	C	G	746.3	PASS	1	1338	1	DTX1	nonsynonymous SNV	.	.	.	.	.	.	.	.	.	.	.	.	.	.	.	.	.	.	.	.	.	.	.	.	.	.	.	.	.	.	.	.	.	.	.	.	.	.
12	120534955	rs187211562	C	T	417.3	PASS	1	84	1	RAB35	nonsynonymous SNV
12	121426662	.	T	C	241.8	PASS	1	1432	1	HNF1A	nonsynonymous SNV	.	.	.	.	.	.	.	.	.	.	.	.	.	.	.	.	.	.	.	.	.	.	.	.	.	.	.	.	.	.	.	.	.	.	.	.	.	.
12	122255297	rs374547458	G	A	560.4	PASS	1	4103593	1	SETD1B	nonsynonymous SNV	.	.	.	.	.	.	.	0.0002	0.0008	.	.	.	.	0.0004	0	0	0	0	0.0008	0	0	0.0007	.	0.0009	.	.	0.0002	0.0001	0	0	0	0	0.0005	0	5.07e-05	0.0001	0.0001	0
12	122257694	rs565436724	C	T	390.6	PASS	2	1276;356	1,1	SETD1B	nonsynonymous SNV	.	.	.	.	.	.	.	0.0006	.	.	0.003	.	.	0.0002	0	0	0.005	0	0.0001	0	0	.	.	.	.	.	0.0002	0	4.18e-05	0	0.002	0	0.0002	0	0	0.0002	0	0
12	122260479	rs372668133	C	T	639.5	PASS	1	4128355	1	SETD1B	nonsynonymous SNV	COSM5792181;COSM5792180	1(breast)	.	.	.	.	.	0.0006	.	.	.	.	0.0031	0.0017	0	0	0	0	0.0003	0	0.0044	.	.	.	.	.	0.0006	0.0003	0	0	0	0.0002	0.0002	0.0003	0.0035	0.0002	0.0001	0
12	122260698	.	G	C	74.7	PASS	1	4110498	1	SETD1B	nonsynonymous SNV	.	.	.	.	.	.	.	.	.	.	.	.	.	.	.	.	.	.	.	.	.	.	.	.	.	.	.	.	.	.	.	.	.	.	.	.	.	.
12	122261215	rs547984481	C	T	208	PASS	1	1479	1	SETD1B	nonsynonymous SNV	.	.	.	.	.	.	.	0.0004	.	0.0014	.	.	0.001	7.68e-05	0	0	0	0	0	0	0.0001	.	.	.	.	.	0.0003	0.0002	0.0009	0	0	0	0.0003	0.0014	4.44e-05	0.0002	0	0.0012
12	122762715	.	C	T	3050.6	PASS	1	862	1	CLIP1	nonsynonymous SNV	.	.	.	.	.	.	.	.	.	.	.	.	.	.	.	.	.	.	.	.	.	.	.	.	.	.	.	.	.	.	.	.	.	.	.	.	.	.
12	122825299	rs144240398	C	A	200.3	PASS	1	83	1	CLIP1	splice_donor
12	122845621	.	C	G	186.4	PASS	1	760	1	CLIP1	nonsynonymous SNV	.	.	.	.	.	.	.	.	.	.	.	.	.	.	.	.	.	.	.	.	.	.	.	.	.	.	.	.	.	.	.	.	.	.	.	.	.	.
12	122958526	rs150057798	G	A	4108.9	PASS	6	1052;1295;422;535;1360;4197155	2,2,1,1,1,1	ZCCHC8	nonsynonymous SNV	.	.	.	.	.	.	.	0.0008	.	0.0014	.	0.003	.	0.0022	0.0005	0.001	0	0.0002	0.0034	0.0012	0.0015	0.0033	0.0007	0.0046	.	.	0.0022	0.0002	0.0014	0.0032	0	0.0002	0.0037	0.0023	0.0011	0.0018	0.0007	0
12	124812003	.	G	A	689.2	PASS	1	4146301	1	NCOR2	nonsynonymous SNV	.	.	.	.	.	.	.	.	.	.	.	.	.	.	.	.	.	.	.	.	.	.	.	.	.	.	.	.	.	.	.	.	.	.	.	.	.	.
12	124816999	.	T	C	180.5	PASS	1	1168	1	NCOR2	nonsynonymous SNV	.	.	.	.	.	.	.	.	.	.	.	.	.	.	.	.	.	.	.	.	.	.	.	.	.	.	.	.	.	.	.	.	.	.	.	.	.	.
12	124824561	rs200853446	G	A	363.9	PASS	1	4171946	1	NCOR2	nonsynonymous SNV	.	.	.	.	.	.	.	0.0002	.	.	0.001	.	.	9.26e-05	0.0001	0	0.0006	0	7.65e-05	0	0	0.0001	0.0002	.	.	.	7.76e-05	6.57e-05	2.98e-05	0	0.0005	0	7.22e-05	0	0	.	.	.
12	124832860	rs372325371	C	A	207.4	PASS	1	376	1	NCOR2	nonsynonymous SNV	.	.	.	.	.	.	.	0.0006	.	.	.	.	0.0031	0.0006	0	0	0	0	0.0002	0	0.0042	0.0002	.	0.0002	.	.	0.0005	0	6.12e-05	0.0015	0	0	0.0001	0.0002	0.0029	6.48e-05	0	0
12	124835208	rs199979566	G	A	1539.9	PASS	2	1257;566	1,1	NCOR2	nonsynonymous SNV	.	.	.	.	.	.	.	0.0002	.	0.0014	.	.	.	0.0001	0.0001	0.0003	0	0	0.0002	0	0	0.0002	0.0002	0.0002	.	.	0.0002	0.0001	0.0002	0	0	0	0.0002	0.0004	0	0.0002	0	0.0012
12	124835279	rs200297509	G	A	490.7	PASS	2	1184;194	1,1	NCOR2	nonsynonymous SNV	.	.	.	.	.	.	.	0.0004	0.0008	.	.	0.001	.	0.0006	0.0002	0.0006	0	0	0.0008	0	0.0001	0.0006	0.0002	0.0008	.	.	0.0006	0.0003	0.0006	0	5.81e-05	0	0.001	0.0009	6.5e-05	0.0004	0.0002	0.0012
12	133219838	rs142508245	C	T	337.9	PASS	2	006;4199996	1,1	POLE	nonsynonymous SNV	.	.	Likely benign|other	Colorectal_cancer\x2c_susceptibility_to\x2c_12|not_specified	RCV000226333.2|RCV000236616.2	MedGen:OMIM|MedGen	C3554460:615083|CN169374	0.0002	.	.	.	0.001	.	0.0011	0.0027	0.0014	0	0	0.0013	0.0011	0	0.0018	0.0025	0.0014	.	.	0.0011	0.0026	0.001	0.0006	0	0.0001	0.0016	0.0013	3.26e-05	0.0016	0.0017	0.0024
12	133237569	rs147692158	C	T	430.5	PASS	3	1464;4145528;4194891	1,1,1	POLE	nonsynonymous SNV	.	.	Likely benign|Uncertain significance	Colorectal_cancer\x2c_susceptibility_to\x2c_12|not_specified	RCV000206219.3|RCV000235475.2	MedGen:OMIM|MedGen	C3554460:615083|CN169374	0.0002	.	.	.	0.001	.	0.001	9.67e-05	0.0003	0	0.0009	0.0016	0	0	0.0009	0.0005	0.0012	.	.	0.0008	6.54e-05	0.0002	0	0	0.0005	0.0015	0.0009	0	0.0006	0.0005	0
12	133240981	.	C	G	48.8	PASS	1	39	1	POLE	nonsynonymous SNV	.	.	.	.	.	.	.	.	.	.	.	.	.	.	.	.	.	.	.	.	.	.	.	.	.	.	.	.	.	.	.	.	.	.	.	.	.	.
12	133252043	.	G	C	681.7	PASS	1	1103	1	POLE	nonsynonymous SNV	.	.	.	.	.	.	.	.	.	.	.	.	.	.	.	.	.	.	.	.	.	.	.	.	.	.	.	.	.	.	.	.	.	.	.	.	.	.
12	133253180	rs139075637	A	T	539	PASS	7	4116268;4121361;4138527;4158726;4171946;4173863;4190316	1,1,1,1,1,1,1	POLE	nonsynonymous SNV	.	.	other|Uncertain significance	Colorectal_cancer\x2c_susceptibility_to\x2c_12|not_specified	RCV000206840.4|RCV000255185.2	MedGen:OMIM|MedGen	C3554460:615083|CN169374	0.0004	.	.	.	0.002	.	0.0009	0.0002	0	0	0.0002	0.0015	0	0	0.0009	0.0002	0.0013	.	.	0.0008	0.0003	2.98e-05	0	0	0.0001	0.0017	0.0005	0	0.0008	0.0003	0
12	133257789	rs143626223	G	A	564.7	PASS	2	1489;4107990	1,1	POLE	nonsynonymous SNV	.	.	Likely benign|Uncertain significance	Colorectal_cancer\x2c_susceptibility_to\x2c_12|not_specified	RCV000234674.2|RCV000236828.2	MedGen:OMIM|MedGen	C3554460:615083|CN169374	0.0002	.	0.0014	.	.	.	0.0009	0.0002	8.64e-05	0	0.0014	0.0013	0.0011	0.0004	0.001	0.0007	0.0012	.	.	0.0008	0.0002	0.0001	0	0	0.0012	0.0013	0.0011	0.0004	0.0008	0.0001	0
13	20567721	.	G	A	5536.8	PASS	1	139	1	ZMYM2	nonsynonymous SNV	.	.	.	.	.	.	.	.	.	.	.	.	.	.	.	.	.	.	.	.	.	.	.	.	.	.	.	.	.	.	.	.	.	.	.	.	.	.
13	20567907	.	T	G	1319.4	PASS	1	47	1	ZMYM2	nonsynonymous SNV	.	.	.	.	.	.	.	.	.	.	.	.	.	.	.	.	.	.	.	.	.	.	.	.	.	.	.	.	.	.	.	.	.	.	.	.	.	.
13	20605511	rs187724961	T	C	367.3	PASS	1	1292	1	ZMYM2	nonsynonymous SNV	.	.	.	.	.	.	.	0.0002	.	.	.	0.001	.	9.26e-05	0	0	0.0001	0.0012	3.04e-05	0	0	0.0001	.	0.0001	.	.	0.0002	6.61e-05	6.44e-05	0	5.94e-05	0.0014	3.63e-05	0	0	0.0002	0	0
13	20625636	rs953697486	G	A	462.7	PASS	1	4108627	1	ZMYM2	nonsynonymous SNV	.	.	.	.	.	.	.	.	.	.	.	.	.	.	.	.	.	.	.	.	.	.	.	.	.	.	.	.	.	.	.	.	.	.	.	.	.	.
13	20763366	rs150529554	C	T	996.6	PASS	1	886	1	GJB2	nonsynonymous SNV	COSM2265387	1(breast)	Likely pathogenic|Likely benign|Likely benign|Likely benign|Likely benign|Likely benign	Non-syndromic_genetic_deafness|Nonsyndromic_Hearing_Loss\x2c_Recessive|Nonsyndromic_Hearing_Loss\x2c_Dominant|Mutilating_keratoderma|Keratitis-Ichthyosis-Deafness_Syndrome|Hystrix-like_ichthyosis_with_deafness	RCV000168672.2|RCV000278504.1|RCV000336897.1|RCV000342849.1|RCV000404731.1|RCV000407574.1	MedGen:Orphanet|MedGen|MedGen|MedGen:OMIM:Orphanet:SNOMED_CT|MedGen|MedGen:OMIM	CN043648:ORPHA87884|CN239439|CN239435|C0265964:124500:ORPHA494:24559001|C0265336|C1865234:602540	0.0002	.	.	.	0.001	.	9.91e-05	9.7e-05	8.67e-05	0	0	0.0001	0	0.0001	0.0002	.	0.0003	.	0.016	9.39e-05	6.55e-05	2.98e-05	0	0	0	0.0002	0	9.75e-05	6.46e-05	0.0001	0
13	20763599	rs866127155	T	C	1842.6	PASS	1	1298	1	GJB2	nonsynonymous SNV	.	.	.	.	.	.	.	.	.	.	.	.	.	.	.	.	.	.	.	.	.	.	.	.	.	.	.	.	.	.	.	.	.	.	.	.	.	.
13	21362667	.	A	T	422.2	PASS	1	4147968	1	XPO4	nonsynonymous SNV	.	.	.	.	.	.	.	.	.	.	.	.	.	.	.	.	.	.	.	.	.	.	.	.	.	.	.	.	.	.	.	.	.	.	.	.	.	.
13	21417959	rs1283500665	T	C	514.9	PASS	1	4130051	1	XPO4	nonsynonymous SNV	.	.	.	.	.	.	.	.	.	.	.	.	.	.	.	.	.	.	.	.	.	.	.	.	.	.	.	.	.	.	.	.	.	.	.	.	.	.
13	21565434	rs45453992	C	T	465.6	PASS	1	850	1	LATS2	nonsynonymous SNV	.	.	.	.	.	.	.	0.0004	.	.	.	0.002	.	0.0005	0.0003	0	0.0015	0	0.0006	0	0	0.0004	0.0002	0.0005	.	.	0.0005	0.0001	0	0	0.0023	4.49e-05	0.0008	0.0007	0	0.0003	0.0001	0
13	28537449	rs553066746	ACTT	A	124.3	PASS	1	1294	1	CDX2	nonframeshift deletion	.	.	.	.	.	.	.	0.0008	0.0015	.	.	0.002	.	0.0002	0.0012	0.0001	0	0	0.0002	0	0	0.0002	0.0007	.	.	.	0.0002	0.0009	0.0002	0.0008	0	0	0.0001	0	0	0.0003	0.001	0
13	28539033	rs773759361	C	A	481	PASS	1	4128355	1	CDX2	nonsynonymous SNV	.	.	.	.	.	.	.	.	.	.	.	.	.	.	.	.	.	.	.	.	.	.	.	.	.	.	.	.	.	.	.	.	.	.	.	.	.	.
13	28609652	rs527809498	G	A	1044	PASS	1	772	1	FLT3	nonsynonymous SNV	.	.	.	.	.	.	.	0.0002	.	.	.	0.001	.	0.0001	9.61e-05	8.64e-05	0.0008	0	9.03e-05	0	0	.	.	.	.	.	0.0002	6.54e-05	6e-05	0	0.0013	4.49e-05	9.88e-05	0	3.29e-05	3.23e-05	0	0
13	28611367	.	T	G	1042.9	PASS	1	324	1	FLT3	nonsynonymous SNV	.	.	.	.	.	.	.	.	.	.	.	.	.	.	.	.	.	.	.	.	.	.	.	.	.	.	.	.	.	.	.	.	.	.	.	.	.	.
13	32907111	rs397507591	AG	A	233.4	PASS	1	4140544	1	BRCA2	frameshift deletion	.	.	not provided|Pathogenic	Familial_cancer_of_breast|Breast-ovarian_cancer\x2c_familial_2	RCV000043818.2|RCV000077258.4	MedGen:OMIM:Orphanet:SNOMED_CT|MedGen:OMIM	C0346153:114480:ORPHA227535:254843006|C2675520:612555	.	.	.	.	.	.	.	.	.	.	.	.	.	.	.	.	.	.	.	.	.	.	.	.	.	.	.	.	.	.	.
13	32937333	rs28897745	A	G	513.3	PASS	1	1295	1	BRCA2	nonsynonymous SNV	.	.	other|other|Benign|other	Breast-ovarian_cancer\x2c_familial_2|Hereditary_breast_and_ovarian_cancer_syndrome|Hereditary_cancer-predisposing_syndrome|not_specified	RCV000031716.7|RCV000045378.7|RCV000129068.2|RCV000160248.3	MedGen:OMIM|MedGen:Orphanet|MedGen:SNOMED_CT|MedGen	C2675520:612555|C0677776:ORPHA145|C0027672:699346009|CN169374	0.0002	.	.	.	0.001	.	0.0001	0	0	0	0	0.0002	0.0011	0	0.0005	.	0.0007	.	.	0.0002	0	0.0006	0	0	4.52e-05	0.0003	0.0004	3.25e-05	0.0002	0	0.0012
13	32945172	rs11571747	A	C	552.1	PASS	2	275;4178518	1,1	BRCA2	nonsynonymous SNV	.	.	other|Likely benign|Benign|other|other|Likely benign	Breast-ovarian_cancer\x2c_familial_2|not_provided|Hereditary_cancer-predisposing_syndrome|not_specified|Hereditary_breast_and_ovarian_cancer_syndrome|Fanconi_anemia	RCV000031751.8|RCV000034464.3|RCV000131022.2|RCV000152885.6|RCV000167825.7|RCV000371112.1	MedGen:OMIM|MedGen|MedGen:SNOMED_CT|MedGen|MedGen:Orphanet|MedGen:Orphanet:SNOMED_CT	C2675520:612555|CN221809|C0027672:699346009|CN169374|C0677776:ORPHA145|C0015625:ORPHA84:30575002	0.0002	.	.	.	0.001	.	0.0009	0.0007	0	0	0.0009	0.0014	0	0	0.0015	0.0005	0.002	.	.	0.0011	0.0008	0	0	0	0.0007	0.0021	0.0011	0	0.0016	0.0005	0
13	32953549	rs28897754	G	T	683.9	PASS	3	4103593;4119463;4133263	1,1,1	BRCA2	nonsynonymous SNV	COSM5019704;COSM5019703	2(soft_tissue)	Benign|Likely benign|other\x2cother|other|other|other	not_specified|Hereditary_cancer-predisposing_syndrome|Hereditary_breast_and_ovarian_cancer_syndrome\x2cHereditary_breast_and_ovarian_cancer_syndrome|Breast-ovarian_cancer\x2c_familial_2|not_specified|Hereditary_cancer-predisposing_syndrome	RCV000124011.2|RCV000163136.2|RCV000196478.2\x2cRCV000045642.9|RCV000114008.4|RCV000120366.8|RCV000162603.3	MedGen|MedGen:SNOMED_CT|MedGen:Orphanet\x2cMedGen:Orphanet|MedGen:OMIM|MedGen|MedGen:SNOMED_CT	CN169374|C0027672:699346009|C0677776:ORPHA145\x2cC0677776:ORPHA145|C2675520:612555|CN169374|C0027672:699346009	0.0012	.	0.0029	.	0.004	.	0.0007	9.76e-05	0.0018	0	0.0008	0.0008	0.0011	0	0.0005	.	0.0008	.	.	0.0007	0.0003	0.0018	0	0	0.0004	0.0009	0.002	0	0.0003	0.0002	0.0012
13	35619160	.	G	A	2306	PASS	1	398	1	NBEA	nonsynonymous SNV	.	.	.	.	.	.	.	.	.	.	.	.	.	.	.	.	.	.	.	.	.	.	.	.	.	.	.	.	.	.	.	.	.	.	.	.	.	.
13	35619533	.	G	A	390.9	PASS	1	4170577	1	NBEA	nonsynonymous SNV	COSM6029042;COSM6029041	2(large_intestine)	.	.	.	.	.	.	.	.	.	.	.	.	.	.	.	.	.	.	.	.	.	.	.	.	.	.	.	.	.	.	.	.	.	.	.	.
13	35733825	.	G	A	2895.9	PASS	1	312	1	NBEA	nonsynonymous SNV	.	.	.	.	.	.	.	.	.	.	.	.	.	.	.	.	.	.	.	.	.	.	.	.	.	.	.	.	.	.	.	.	.	.	.	.	.	.
13	35734141	rs193066744	G	A	1616.4	PASS	5	141;170;680;788;859	1,1,1,1,1	NBEA	nonsynonymous SNV	COSM1366581;COSM5158909	1(large_intestine)	.	.	.	.	.	0.001	.	0.0043	.	0.002	.	0.0019	0.0008	0.0026	0	0.0009	0.0027	0	0.0005	0.0014	0.0005	0.0017	.	.	0.0013	0.0005	0.0015	0	6.8e-05	0.0004	0.002	0.0019	0.0005	0.0008	0.0003	0.0012
13	35735887	.	G	A	459.4	PASS	1	4160468	1	NBEA	nonsynonymous SNV	.	.	.	.	.	.	.	.	.	.	.	.	.	.	.	.	.	.	.	.	.	.	.	.	.	.	.	.	.	.	.	.	.	.	.	.	.	.
13	35745410	rs201205330	C	T	460	PASS	4	1183;509;1292;4101815	1,1,1,1	NBEA	nonsynonymous SNV	COSM5362079;COSM5362080	1(large_intestine)	.	.	.	.	.	0.0004	.	.	.	.	0.002	0.0008	0.0002	0.0025	0	0	0.0005	0	0.0017	0.0006	.	0.0009	.	.	0.0007	0.0001	0.0019	0	0	0	0.0005	0.0002	0.0016	0.0003	0	0
13	35770201	rs561239166	G	A	1769.1	PASS	1	358	1	NBEA	nonsynonymous SNV	COSM4705638;COSM262305	2(liver);1(skin);3(large_intestine);1(endometrium)	.	.	.	.	.	0.0002	.	.	.	.	0.001	8.3e-06	0	0	0	0	0	0	6.06e-05	.	.	.	.	.	4.08e-06	0	0	0	0	0	0	0	3.25e-05	.	.	.
13	36124683	.	C	T	506.9	PASS	1	4139696	1	NBEA	nonsynonymous SNV	COSM276259	1(large_intestine);1(endometrium)	.	.	.	.	.	.	.	.	.	.	.	.	.	.	.	.	.	.	.	.	.	.	.	.	.	.	.	.	.	.	.	.	.	.	.	.
13	36125129	.	C	T	352.1	PASS	1	4145528	1	NBEA	nonsynonymous SNV	COSM4047246;COSM4047245	1(stomach)	.	.	.	.	.	.	.	.	.	.	.	.	.	.	.	.	.	.	.	.	.	.	.	.	.	.	.	.	.	.	.	.	.	.	.	.
13	41133856	rs1273268681	C	T	254.9	PASS	1	4147360	1	FOXO1	nonsynonymous SNV	.	.	.	.	.	.	.	.	.	.	.	.	.	.	.	.	.	.	.	.	.	.	.	.	.	.	.	.	.	.	.	.	.	.	.	.	.	.
13	41133967	rs139398811	C	T	363.1	PASS	1	33	1	FOXO1	nonsynonymous SNV	.	.	.	.	.	.	.	0.0002	0.0008	.	.	.	.	3.31e-05	0.0004	0	0	0	0	0	0	0.0003	0.0009	.	.	.	4.07e-05	0.0003	0.0001	0	0	0	8.99e-06	0	0	3.23e-05	0.0001	0
13	46726923	rs138605281	C	T	2106.1	PASS	2	114;4147081	1,1	LCP1	nonsynonymous SNV	.	.	.	.	.	.	.	0.0004	.	.	.	0.002	.	0.0008	9.63e-05	0.0003	0	0.0003	0.0011	0.0011	0.0007	0.0008	.	0.0012	.	.	0.0007	6.54e-05	0.0002	0.0003	0	0.0002	0.0012	0.0004	0.0008	0.0008	0	0.0012
13	92101123	rs142381235	C	T	748.8	PASS	2	1162;721	1,1	GPC5	nonsynonymous SNV	COSM673573	1(endometrium)	.	.	.	.	.	0.0004	0.0008	0.0014	.	.	.	0.0003	0.0003	0.0005	0	0	0.0004	0.0011	0	0.0005	0.0002	0.0006	.	.	0.0004	0.0001	0.0007	0.0037	0	0	0.0002	0.0009	0	0.0004	0.0001	0
13	92345530	rs369076704	G	C	1039.8	PASS	1	689	1	GPC5	nonsynonymous SNV	.	.	.	.	.	.	.	0.0008	.	.	.	.	0.0041	0.0006	9.61e-05	8.64e-05	0	0	0.0001	0	0.0038	0.0002	.	0.0003	.	.	0.0006	6.54e-05	5.96e-05	0	0	0	0.0001	0.0004	0.0041	9.69e-05	0	0
13	103525679	.	C	G	341.9	PASS	1	4166706	1	ERCC5	nonsynonymous SNV	.	.	.	.	.	.	.	.	.	.	.	.	.	.	.	.	.	.	.	.	.	.	.	.	.	.	.	.	.	.	.	.	.	.	.	.	.	.
14	21861809	.	C	G	466.6	PASS	1	4190316	1	CHD8	nonsynonymous SNV	.	.	.	.	.	.	.	.	.	.	.	.	.	.	.	.	.	.	.	.	.	.	.	.	.	.	.	.	.	.	.	.	.	.	.	.	.	.
14	21861869	rs145300090	C	T	461.1	PASS	1	1162	1	CHD8	nonsynonymous SNV	.	.	Uncertain significance	not_specified	RCV000177525.1	MedGen	CN169374	0.0002	.	.	.	0.001	.	0.0008	0.0001	0.0002	0	0	0.0012	0	0.0011	0.0003	0.0002	0.0004	0.011	.	0.0008	0.0001	0.0002	0.0112	0	0	0.0005	0.0005	0.0009	0.0004	0.0003	0.0012
14	32560869	.	A	G	2453.6	PASS	1	338	1	ARHGAP5	nonsynonymous SNV	.	.	.	.	.	.	.	.	.	.	.	.	.	.	.	.	.	.	.	.	.	.	.	.	.	.	.	.	.	.	.	.	.	.	.	.	.	.
14	32561218	rs1169657706	A	T	413.4	PASS	1	4100636	1	ARHGAP5	nonsynonymous SNV	.	.	.	.	.	.	.	.	.	.	.	.	.	.	.	.	.	.	.	.	.	.	.	.	.	.	.	.	.	.	.	.	.	.	.	.	.	.
14	32561923	rs141134108	C	T	850.2	PASS	1	4175941	1	ARHGAP5	nonsynonymous SNV	COSM4476159	1(skin)	.	.	.	.	.	0.0002	.	0.0014	.	.	.	0.0004	0	0.0002	0	0.0003	0.0007	0	6.07e-05	0.0004	.	0.0006	.	0.0082	0.0005	0	0.0001	0.0053	0	8.99e-05	0.0006	0.0013	0.0002	0.0004	0	0.0036
14	32563165	rs147527447	C	A	251.1	PASS	1	4128477	1	ARHGAP5	nonsynonymous SNV	.	.	.	.	.	.	.	0.0004	0.0015	.	.	.	.	5.03e-05	0.0005	0	0	0	1.53e-05	0	0	0.0002	0.0007	.	.	.	6.14e-05	0.0006	8.95e-05	0	0	0	2.72e-05	0	0	0.0003	0.001	0
14	35222823	.	C	G	517.6	PASS	1	821	1	BAZ1A	nonsynonymous SNV	.	.	.	.	.	.	.	.	.	.	.	.	.	.	.	.	.	.	.	.	.	.	.	.	.	.	.	.	.	.	.	.	.	.	.	.	.	.
14	35249505	rs867509502	C	T	724.2	PASS	1	1512	1	BAZ1A	nonsynonymous SNV	.	.	.	.	.	.	.	.	.	.	.	.	.	.	.	.	.	.	.	.	.	.	.	.	.	.	.	.	.	.	.	.	.	.	.	.	.	.
14	35873822	.	T	C	919.1	PASS	1	861	1	NFKBIA	nonsynonymous SNV	.	.	.	.	.	.	.	.	.	.	.	.	.	.	.	.	.	.	.	.	.	.	.	.	.	.	.	.	.	.	.	.	.	.	.	.	.	.
14	38064109	rs139801655	C	G	179.9	PASS	1	4177434	1	FOXA1	nonsynonymous SNV	.	.	.	.	.	.	.	0.0002	.	.	.	0.001	.	0.001	0.0002	0.0007	0	0	0.0016	0	0.0002	0.0012	0.0002	0.0016	.	.	0.001	0.0002	0.0007	0.0002	0	0.0002	0.0017	0.0012	0.0001	0.0008	0	0.0014
14	45667921	rs144567652	C	T	753.3	PASS	3	1326;558;4133863	1,1,1	FANCM	stopgain	COSM5019161	1(soft_tissue)	.	.	.	.	.	0.0006	.	.	.	0.003	.	0.0009	0.0005	0.0002	0	0.0045	0.0009	0.0011	0.0004	0.0008	0.0007	0.0009	.	0.0082	0.001	0.0003	0.0004	0	5.8e-05	0.0044	0.0011	0.0007	0.0003	0.001	0.0001	0
14	45668099	.	T	C	485.3	PASS	1	669	1	FANCM	nonsynonymous SNV	.	.	.	.	.	.	.	.	.	.	.	.	.	.	.	.	.	.	.	.	.	.	.	.	.	.	.	.	.	.	.	.	.	.	.	.	.	.
14	45669156	.	A	G	468.6	PASS	1	4121974	1	FANCM	nonsynonymous SNV	.	.	.	.	.	.	.	.	.	.	.	.	.	.	.	.	.	.	.	.	.	.	.	.	.	.	.	.	.	.	.	.	.	.	.	.	.	.
14	51196272	.	T	C	222.2	PASS	1	4128970	1	NIN	nonsynonymous SNV	.	.	.	.	.	.	.	.	.	.	.	.	.	.	.	.	.	.	.	.	.	.	.	.	.	.	.	.	.	.	.	.	.	.	.	.	.	.
14	56079248	rs529619703	C	T	449.7	PASS	1	4107559	1	KTN1	nonsynonymous SNV	COSM4496803	1(skin)	.	.	.	.	.	0.0002	0.0008	.	.	.	.	8.31e-06	9.76e-05	0	0	0	0	0	0	.	.	.	.	.	8.62e-06	6.69e-05	0	0	0	0	9.29e-06	0	0	.	.	.
14	56085984	.	A	G	279.4	PASS	1	4139483	1	KTN1	nonsynonymous SNV	.	.	.	.	.	.	.	.	.	.	.	.	.	.	.	.	.	.	.	.	.	.	.	.	.	.	.	.	.	.	.	.	.	.	.	.	.	.
14	56117065	rs45460501	A	G	6961.8	PASS	2	316;4197155	1,1	KTN1	nonsynonymous SNV	.	.	.	.	.	.	.	0.0002	.	.	.	0.001	.	0.0008	0.0004	0.0003	0	0	0.0014	0	0	0.0005	0.0002	0.0007	.	.	0.0007	0.0003	0.0002	0	0	0.0005	0.0014	0.0004	0	0.0004	0.0001	0.0024
14	61113130	rs766975120	C	G	407.3	PASS	2	1080;1277	1,1	SIX1	nonsynonymous SNV	.	.	.	.	.	.	.	.	.	.	.	.	.	.	.	.	.	.	.	.	.	.	.	.	.	.	.	.	.	.	.	.	.	.	.	.	.	.
14	61115513	.	T	C	788.4	PASS	1	854	1	SIX1	nonsynonymous SNV	.	.	.	.	.	.	.	.	.	.	.	.	.	.	.	.	.	.	.	.	.	.	.	.	.	.	.	.	.	.	.	.	.	.	.	.	.	.
14	62187212	rs61755705	G	C	1069.7	PASS	4	034;116;621;780	1,1,1,1	HIF1A	nonsynonymous SNV	.	.	.	.	.	.	.	0.001	.	.	.	0.004	0.001	0.0018	0.0005	0.0003	0	0.0003	0.0026	0	0.0023	0.0026	0.0007	0.0036	.	.	0.002	0.0003	0.0011	0.0078	0	0.0005	0.0026	0.002	0.0019	0.0018	0.0009	0.0036
14	62187244	.	G	T	505.2	PASS	1	473	1	HIF1A	nonsynonymous SNV	.	.	.	.	.	.	.	.	.	.	.	.	.	.	.	.	.	.	.	.	.	.	.	.	.	.	.	.	.	.	.	.	.	.	.	.	.	.
14	62203643	rs202183359	A	T	363.6	PASS	1	1328	1	HIF1A	nonsynonymous SNV	.	.	.	.	.	.	.	0.0002	.	.	.	0.001	.	4.94e-05	0	8.64e-05	0	0	7.5e-05	0	0	0.0001	.	0.0001	.	.	9.35e-05	0	0.0002	0	0	0	0.0001	0.0004	0	3.23e-05	0	0
14	66975271	rs150226537	C	G	901.4	PASS	3	278;887;4183136	1,1,1	GPHN	nonsynonymous SNV	.	.	.	.	.	.	.	0.001	.	0.0014	.	0.004	.	0.0014	0.0003	0.001	0	0.0002	0.0021	0	0.0004	0.0015	0.0005	0.002	.	0.0082	0.0013	0.0003	0.0015	0.0001	0	0.0003	0.0021	0.0027	0.0006	0.0012	0.0005	0.0012
14	67589070	.	T	C	490.4	PASS	1	1489	1	GPHN	nonsynonymous SNV	.	.	.	.	.	.	.	.	.	.	.	.	.	.	.	.	.	.	.	.	.	.	.	.	.	.	.	.	.	.	.	.	.	.	.	.	.	.
14	68301887	.	G	C	416	PASS	1	64	1	RAD51B	nonsynonymous SNV	.	.	.	.	.	.	.	.	.	.	.	.	.	.	.	.	.	.	.	.	.	.	.	.	.	.	.	.	.	.	.	.	.	.	.	.	.	.
14	68331831	.	A	G	263.7	PASS	1	1183	1	RAD51B	nonsynonymous SNV	.	.	.	.	.	.	.	.	.	.	.	.	.	.	.	.	.	.	.	.	.	.	.	.	.	.	.	.	.	.	.	.	.	.	.	.	.	.
14	68331840	rs200741476	G	A	292.7	PASS	2	4101316;4136095	1,1	RAD51B	nonsynonymous SNV	.	.	.	.	.	.	.	0.0002	.	.	.	0.001	.	7.46e-05	0	0	0	0	0.0001	0	0	0.0001	.	0.0001	.	.	0.0001	0	0	0	0	0	0.0003	0	0	3.33e-05	0	0
14	69262791	.	C	A	413.6	PASS	1	4158769	1	ZFP36L1	splice_donor
14	69262951	.	G	A	918.7	PASS	1	1103	1	ZFP36L1	stopgain
14	81557483	rs141293178	A	T	444.2	PASS	1	1407	1	TSHR	nonsynonymous SNV	.	.	.	.	.	.	.	0.0008	.	0.0014	.	0.001	0.002	0.0007	0.0003	0	0	0.0005	0.0007	0	0.002	0.0008	0.0007	0.0008	.	.	0.0006	0.0002	0.0001	0	0	0.0001	0.0008	0.0007	0.0016	0.0003	0	0
14	81562992	.	C	A	382.8	PASS	1	4163297	1	TSHR	stopgain	.	.	.	.	.	.	.	.	.	.	.	.	.	.	.	.	.	.	.	.	.	.	.	.	.	.	.	.	.	.	.	.	.	.	.	.	.	.
14	81610339	.	C	G	579	PASS	1	1047	1	TSHR	stopgain	.	.	.	.	.	.	.	.	.	.	.	.	.	.	.	.	.	.	.	.	.	.	.	.	.	.	.	.	.	.	.	.	.	.	.	.	.	.
14	92441008	rs141259390	G	A	495.1	PASS	2	038;318	1,1	TRIP11	nonsynonymous SNV	COSM4148304	1(thyroid)	other	not_specified	RCV000261771.2	MedGen	CN169374	0.0006	.	0.0029	.	.	0.001	0.0011	0.0005	0.001	0	0	0.0013	0.0022	0.0016	0.0006	.	0.0009	.	.	0.0011	0.0003	0.0013	0.0049	0	4.48e-05	0.001	0.0031	0.0017	0.0004	0.0005	0
14	93290929	.	G	C	641.5	PASS	1	4131095	1	GOLGA5	nonsynonymous SNV	.	.	.	.	.	.	.	.	.	.	.	.	.	.	.	.	.	.	.	.	.	.	.	.	.	.	.	.	.	.	.	.	.	.	.	.	.	.
14	93299492	.	GCAGT	G	1710.3	PASS	1	881	1	GOLGA5	frameshift deletion
14	94844866	rs61761869	G	A	454	PASS	1	778	1	SERPINA1	nonsynonymous SNV	.	.	Pathogenic|Pathogenic\x2cPathogenic	Alpha-1-antitrypsin_deficiency|not_provided\x2cAlpha-1-antitrypsin_deficiency	RCV000336993.1|RCV000443069.1\x2cRCV000206411.1	MedGen:OMIM:Orphanet:SNOMED_CT|MedGen\x2cMedGen:OMIM:Orphanet:SNOMED_CT	C0221757:613490:ORPHA60:30188007|CN221809\x2cC0221757:613490:ORPHA60:30188007	0.0002	.	.	.	0.001	.	0.0003	0	0.0002	0	0.0002	0.0004	0	6.06e-05	0.0002	.	0.0002	.	0.016	0.0003	6.53e-05	0.0002	0	0	4.48e-05	0.0005	0.0002	3.25e-05	0.0003	0.0001	0
14	94844967	rs796549685	T	A	119.6	PASS	2	1078;1276	1,1	SERPINA1	nonsynonymous SNV	.	.	.	.	.	.	.	.	.	.	.	.	.	.	.	.	.	.	.	.	.	.	.	.	.	.	.	.	.	.	.	.	.	.	.	0.0071	0.0063	0.0095
14	94845829	rs796680542	G	C	209.2	PASS	2	1430;1477	1,1	SERPINA1	nonsynonymous SNV	.	.	.	.	.	.	.	.	.	.	.	.	.	.	.	.	.	.	.	.	.	.	.	.	.	.	.	.	.	.	.	.	.	.	.	.	.	.
14	94848947	.	T	A	348.5	PASS	1	4158726	1	SERPINA1	nonsynonymous SNV	.	.	.	.	.	.	.	.	.	.	.	.	.	.	.	.	.	.	.	.	.	.	.	.	.	.	.	.	.	.	.	.	.	.	.	.	.	.
14	94849388	rs28931570	G	A	1175.8	PASS	2	016;591	1,1	SERPINA1	nonsynonymous SNV	COSM959169	1(soft_tissue);1(endometrium)	other|other|Uncertain significance|Pathogenic|Likely pathogenic	PI_I|Alpha-1-antitrypsin_deficiency|not_specified|Alpha-1-antitrypsin_deficiency|not_provided	RCV000019575.3|RCV000148875.2|RCV000175577.1|RCV000205893.1|RCV000431149.1	MedGen:OMIM:Orphanet:SNOMED_CT|MedGen|MedGen:OMIM:Orphanet:SNOMED_CT|MedGen	C0221757:613490:ORPHA60:30188007|CN169374|C0221757:613490:ORPHA60:30188007|CN221809	0.0006	.	.	.	0.003	.	0.001	0.0002	0.0003	0.0003	0	0.0016	0	6.07e-05	0.0016	0.0007	0.0021	.	.	0.001	0.0005	0.0004	0	0.0002	0	0.002	0.0011	3.25e-05	0.0013	0.0005	0.0012
14	95557579	.	C	G	252.1	PASS	1	4171810	1	DICER1	nonsynonymous SNV	.	.	.	.	.	.	.	.	.	.	.	.	.	.	.	.	.	.	.	.	.	.	.	.	.	.	.	.	.	.	.	.	.	.	.	.	.	.
14	95574253	rs149242330	C	T	798.7	PASS	5	058;1297;1507;325;1430	1,1,1,1,1	DICER1	nonsynonymous SNV	COSM959266	1(endometrium)	not provided|Likely benign|Likely benign	not_specified|DICER1-related_pleuropulmonary_blastoma_cancer_predisposition_syndrome|Pleuropulmonary_blastoma	RCV000120636.1|RCV000226630.2|RCV000301877.1	MedGen|MedGen:OMIM|MedGen:Orphanet	CN169374|CN072455:601200|C1266144:ORPHA64742	0.001	0.0008	0.0014	.	0.003	.	0.0008	0.0003	0.0016	0	0.0003	0.0011	0.0022	0.0004	0.0008	0.0002	0.0012	.	.	0.0008	0.0003	0.001	0	0	0.0002	0.0012	0.0011	0.0004	0.0006	0.0005	0
14	95582948	.	T	C	3095.4	PASS	1	39	1	DICER1	nonsynonymous SNV	.	.	.	.	.	.	.	.	.	.	.	.	.	.	.	.	.	.	.	.	.	.	.	.	.	.	.	.	.	.	.	.	.	.	.	.	.	.
14	95590785	rs148758903	G	C	1196.1	PASS	1	189	1	DICER1	nonsynonymous SNV	.	.	Uncertain significance|Likely benign	DICER1-related_pleuropulmonary_blastoma_cancer_predisposition_syndrome|Pleuropulmonary_blastoma	RCV000231396.2|RCV000263539.1	MedGen:OMIM|MedGen:Orphanet	CN072455:601200|C1266144:ORPHA64742	0.0002	0.0008	.	.	.	.	0.0004	0.0004	0.0005	0	0	0.0004	0	0.0002	0.0005	0.0005	0.0005	.	.	0.0003	0.0003	0.0002	0.0001	0	4.48e-05	0.0005	0.0002	0.0004	0.0003	0.0002	0.0012
14	96178699	rs146705048	C	T	488.5	PASS	1	4183924	1	TCL1A	nonsynonymous SNV	COSM4953620	2(liver)	.	.	.	.	.	0.0002	.	.	.	0.001	.	0.0004	0	0.0003	0	0	0.0006	0	6.24e-05	0.0002	.	0.0003	.	.	0.0004	6.54e-05	0.0003	0	0	0	0.0007	0	3.25e-05	0.0005	0.0005	0.0024
14	99642125	rs1283850331	G	A	304.1	PASS	1	4121263	1	BCL11B	nonsynonymous SNV	.	.	.	.	.	.	.	.	.	.	.	.	.	.	.	.	.	.	.	.	.	.	.	.	.	.	0	0	0	0	0	0	0	0	0	.	.	.
14	99724042	.	A	C	490.5	PASS	1	4170686	1	BCL11B	nonsynonymous SNV	.	.	.	.	.	.	.	.	.	.	.	.	.	.	.	.	.	.	.	.	.	.	.	.	.	.	.	.	.	.	.	.	.	.	.	.	.	.
14	102552634	.	G	A	446.7	PASS	1	4146301	1	HSP90AA1	stopgain	.	.	.	.	.	.	.	.	.	.	.	.	.	.	.	.	.	.	.	.	.	.	.	.	.	.	.	.	.	.	.	.	.	.	.	.	.	.
15	34643024	rs141497257	T	C	239.6	PASS	1	29	1	NUTM1	nonsynonymous SNV	.	.	.	.	.	.	.	0.0004	0.0008	.	.	0.001	.	0.0008	0.0002	0.0006	0	0	0.0012	0.0011	0	0.001	0.0002	0.0014	.	.	0.001	0.0002	0.0005	0.0135	0	0.0002	0.0006	0.0016	0	0.0004	0.0001	0.0012
15	34646655	.	C	T	444.3	PASS	1	4184437	1	NUTM1	nonsynonymous SNV	.	.	.	.	.	.	.	.	.	.	.	.	.	.	.	.	.	.	.	.	.	.	.	.	.	.	.	.	.	.	.	.	.	.	.	.	.	.
15	41277615	rs141223506	C	T	945.5	PASS	1	345	1	INO80	nonsynonymous SNV	.	.	.	.	.	.	.	0.0006	.	.	.	0.003	.	0.0011	0.0011	0.0005	0	0	0.0014	0.0022	0.0012	0.0018	0.0009	0.0023	.	.	0.0012	0.0009	0.0009	0	0	0	0.0018	0.0018	0.001	0.0012	0.0002	0.0024
15	41364108	.	T	C	667.1	PASS	1	83	1	INO80	nonsynonymous SNV	.	.	.	.	.	.	.	.	.	.	.	.	.	.	.	.	.	.	.	.	.	.	.	.	.	.	.	.	.	.	.	.	.	.	.	.	.	.
15	41371958	.	G	T	1088.4	PASS	1	131	1	INO80	nonsynonymous SNV	.	.	.	.	.	.	.	.	.	.	.	.	.	.	.	.	.	.	.	.	.	.	.	.	.	.	.	.	.	.	.	.	.	.	.	.	.	.
15	41961262	.	C	T	341.1	PASS	1	4175837	1	MGA	nonsynonymous SNV	.	.	.	.	.	.	.	.	.	.	.	.	.	.	.	.	.	.	.	.	.	.	.	.	.	.	.	.	.	.	.	.	.	.	.	.	.	.
15	41961870	.	G	C	414.4	PASS	1	4135350	1	MGA	nonsynonymous SNV	.	.	.	.	.	.	.	.	.	.	.	.	.	.	.	.	.	.	.	.	.	.	.	.	.	.	.	.	.	.	.	.	.	.	.	.	.	.
15	41991134	rs201748568	A	G	492.4	PASS	3	149;272;1056	1,1,1	MGA	nonsynonymous SNV	.	.	.	.	.	.	.	0.0008	0.0008	0.0014	.	0.002	.	0.0005	0.0013	0	0	0	0.0009	0	0	0.0007	0.0014	0.0004	.	.	0.0005	0.0017	0.0014	0.001	0	0	0.0004	0.0013	0	0.0006	0.0016	0.0024
15	42000305	rs1272090898	C	T	258.7	PASS	1	583	1	MGA	nonsynonymous SNV	.	.	.	.	.	.	.	.	.	.	.	.	.	.	.	.	.	.	.	.	.	.	.	.	.	.	.	.	.	.	.	.	.	.	.	.	.	.
15	42019597	rs377081178	A	G	3889.6	PASS	1	510	1	MGA	nonsynonymous SNV	.	.	.	.	.	.	.	0.0002	.	0.0014	.	.	.	0.0001	0	0.0006	0	0	4.51e-05	0	0.0002	0.0001	.	0.0001	.	.	0.0002	0	0.0008	0	0	0	6.29e-05	0.0002	0.0002	3.23e-05	0.0001	0
15	42035163	rs1007592948	C	T	710	PASS	1	474	1	MGA	nonsynonymous SNV	.	.	.	.	.	.	.	.	.	.	.	.	.	.	.	.	.	.	.	.	.	.	.	.	.	.	.	.	.	.	.	.	.	.	.	.	.	.
15	42042466	rs967908721	A	T	419.7	PASS	1	1365	1	MGA	nonsynonymous SNV	.	.	.	.	.	.	.	.	.	.	.	.	.	.	.	.	.	.	.	.	.	.	.	.	.	.	.	.	.	.	.	.	.	.	.	.	.	.
15	42059120	.	G	A	1196	PASS	1	472	1	MGA	nonsynonymous SNV	.	.	.	.	.	.	.	.	.	.	.	.	.	.	.	.	.	.	.	.	.	.	.	.	.	.	.	.	.	.	.	.	.	.	.	.	.	.
15	42059342	rs71472501	T	C	1918	PASS	2	664;4144951	1,1	MGA	nonsynonymous SNV	.	.	.	.	.	.	.	0.0008	0.0008	.	.	0.003	.	0.0009	0.0003	0.0003	0	0.0021	0.0012	0.0022	0.0007	0.0012	0.0003	0.0017	.	.	0.001	0.0002	0.0008	0.0005	0	0.0021	0.0012	0.0009	0.0006	0.0011	0.0008	0.0012
15	50788250	.	C	A	365.9	PASS	1	4183924	1	USP8	nonsynonymous SNV	.	.	.	.	.	.	.	.	.	.	.	.	.	.	.	.	.	.	.	.	.	.	.	.	.	.	.	.	.	.	.	.	.	.	.	.	.	.
15	52622673	rs147898420	G	A	1462.3	PASS	2	325;342	2,1	MYO5A	nonsynonymous SNV	.	.	.	.	.	.	.	0.0002	.	.	.	0.001	.	0.0007	0.0001	0.0004	0	0	0.0011	0	0.0001	0.0008	.	0.0011	.	.	0.0008	6.54e-05	0.0004	0.0107	0	0	0.0005	0.0007	9.75e-05	0.0003	0	0
15	52632542	.	C	T	393.7	PASS	1	4160069	1	MYO5A	nonsynonymous SNV	.	.	.	.	.	.	.	.	.	.	.	.	.	.	.	.	.	.	.	.	.	.	.	.	.	.	.	.	.	.	.	.	.	.	.	.	.	.
15	52643465	rs777833837	C	T	583.8	PASS	1	351	1	MYO5A	nonsynonymous SNV	.	.	.	.	.	.	.	.	.	.	.	.	.	.	.	.	.	.	.	.	.	.	.	.	.	.	.	.	.	.	.	.	.	.	.	.	.	.
15	52643591	.	C	T	544.4	PASS	1	4161288	1	MYO5A	nonsynonymous SNV	.	.	.	.	.	.	.	.	.	.	.	.	.	.	.	.	.	.	.	.	.	.	.	.	.	.	.	.	.	.	.	.	.	.	.	.	.	.
15	52656782	.	T	C	861.2	PASS	1	1268	1	MYO5A	nonsynonymous SNV	.	.	.	.	.	.	.	.	.	.	.	.	.	.	.	.	.	.	.	.	.	.	.	.	.	.	.	.	.	.	.	.	.	.	.	.	.	.
15	52662445	rs200975586	C	T	319	PASS	1	4199714	1	MYO5A	nonsynonymous SNV	.	.	.	.	.	.	.	0.0002	0.0008	.	.	.	.	2.49e-05	0.0001	0	0	0	3e-05	0	0	.	.	.	.	.	2.85e-05	6.54e-05	0	0	0	4.49e-05	4.49e-05	0	0	3.23e-05	0	0
15	52662499	rs1005760412	G	A	1052.9	PASS	1	1444	1	MYO5A	nonsynonymous SNV	COSM4485445;COSM4485444	1(skin);1(biliary_tract)	.	.	.	.	.	.	.	.	.	.	.	.	.	.	.	.	.	.	.	.	.	.	.	.	.	.	.	.	.	.	.	.	.	.	.	.
15	55710427	rs534357896	A	G	1786.9	PASS	1	47	1	C15orf65	nonsynonymous SNV	.	.	.	.	.	.	.	0.0002	.	.	.	0.001	.	0.0005	0	0.0016	0	0	0.0006	0.0022	0	.	.	.	.	.	0.0003	0	0.0004	0	0	0	0.0004	0.0005	0	3.23e-05	0	0
15	56385955	rs188930329	C	T	570.7	PASS	1	4112817	1	RFX7	nonsynonymous SNV	COSM5940539;COSM5940538	1(skin)	.	.	.	.	.	0.0002	.	.	.	0.001	.	0.0007	0.0004	8.66e-05	0	0.0011	0.0011	0.0011	0	0.0009	0.0005	0.0011	.	.	0.0007	0.0003	8.94e-05	0.001	0	0.0017	0.0009	0.0007	0	0.0004	0	0
15	56386432	rs191773270	C	T	446.2	PASS	1	4136702	1	RFX7	nonsynonymous SNV	.	.	.	.	.	.	.	0.0002	.	.	0.001	.	.	6.63e-05	0	0	0.0005	0	4.5e-05	0	6.06e-05	.	.	.	.	.	8.95e-05	0	2.98e-05	0	0.0003	0	0.0001	0	3.25e-05	9.69e-05	0	0
15	56386940	.	T	C	3122.9	PASS	1	762	1	RFX7	nonsynonymous SNV	.	.	.	.	.	.	.	.	.	.	.	.	.	.	.	.	.	.	.	.	.	.	.	.	.	.	.	.	.	.	.	.	.	.	.	.	.	.
15	56388173	rs140370063	C	T	880.3	PASS	1	1075	1	RFX7	nonsynonymous SNV	COSM3794262;COSM3794261	1(urinary_tract)	.	.	.	.	.	0.0002	.	.	.	0.001	.	0.0002	0	0	0	0	0.0003	0	0	0.0002	.	0.0004	.	.	0.0002	6.6e-05	0.0002	0	0	0	0.0004	0.0004	0	0.0002	0	0
15	56388386	rs1487788153	C	A	1091.7	PASS	1	1271	1	RFX7	nonsynonymous SNV	.	.	.	.	.	.	.	.	.	.	.	.	.	.	.	.	.	.	.	.	.	.	.	.	.	.	.	.	.	.	.	.	.	.	.	.	.	.
15	56390574	rs750353636	C	A	198.5	PASS	1	4188800	1	RFX7	nonsynonymous SNV	.	.	.	.	.	.	.	.	.	.	.	.	.	.	.	.	.	.	.	.	.	.	.	.	.	.	0	0	0	0	0	0	0	0	0	.	.	.
15	57545569	rs1402162756	A	G	1007.5	PASS	1	855	1	TCF12	nonsynonymous SNV	.	.	.	.	.	.	.	.	.	.	.	.	.	.	.	.	.	.	.	.	.	.	.	.	.	.	4.07e-06	0	0	0	0	0	0	0	3.25e-05	.	.	.
15	57554367	rs953764180	A	G	1980.7	PASS	1	57	1	TCF12	nonsynonymous SNV	.	.	.	.	.	.	.	.	.	.	.	.	.	.	.	.	.	.	.	.	.	.	.	.	.	.	.	.	.	.	.	.	.	.	.	.	.	.
15	74315485	rs140050477	C	T	610.8	PASS	3	4103593;4142761;4189998	1,1,1	PML	nonsynonymous SNV	.	.	.	.	.	.	.	0.0006	.	0.0014	.	0.002	.	0.0009	0.0004	0.0004	0	0.0009	0.0015	0.0025	0	0.001	0.0005	0.0013	.	.	0.0009	0.0003	0.0003	0	0	0.0008	0.0016	0.0011	0	0.0014	0.0003	0
15	74337119	.	G	A	419.8	PASS	1	115	1	PML	nonsynonymous SNV	.	.	.	.	.	.	.	.	.	.	.	.	.	.	.	.	.	.	.	.	.	.	.	.	.	.	.	.	.	.	.	.	.	.	.	.	.	.
15	75687046	rs532044975	T	C	514	PASS	2	1346;4139483	1,1	SIN3A	nonsynonymous SNV	.	.	.	.	.	.	.	0.0004	.	0.0014	0.001	.	.	0.0001	0	0.0003	0.0003	0	6.01e-05	0	0.0001	.	.	.	.	.	0.0001	0	0.0002	0	0.0003	0	7.18e-05	0.0002	9.79e-05	.	.	.
15	75699475	.	T	C	547.4	PASS	1	664	1	SIN3A	nonsynonymous SNV	.	.	.	.	.	.	.	.	.	.	.	.	.	.	.	.	.	.	.	.	.	.	.	.	.	.	.	.	.	.	.	.	.	.	.	.	.	.
15	75704005	rs61761938	G	A	1328.3	PASS	3	442;176;4139696	1,1,1	SIN3A	nonsynonymous SNV	.	.	.	.	.	.	.	0.0006	.	.	.	0.001	0.002	0.0022	0.0004	0.0018	0	0.0006	0.0028	0.0011	0.0027	0.0021	0.0005	0.0029	.	.	0.002	0.0006	0.0018	0.0001	0	0.0009	0.0029	0.0013	0.0024	0.0017	0.0009	0.0012
15	80450417	.	G	A	314.4	PASS	1	189	1	FAH	nonsynonymous SNV	COSM3504439	1(skin)	.	.	.	.	.	.	.	.	.	.	.	.	.	.	.	.	.	.	.	.	.	.	.	.	.	.	.	.	.	.	.	.	.	.	.	.
15	80460400	rs144234072	C	A	380.1	PASS	1	575	1	FAH	nonsynonymous SNV	.	.	.	.	.	.	.	0.0002	.	.	.	0.001	.	0.0003	0.0004	0	0	0	0.0005	0	0	0.0005	0.0005	0.0006	.	.	0.0002	0.0003	0	0	0	0	0.0005	0.0002	0	0.0002	0.0001	0
15	81517936	.	A	C	448.9	PASS	1	583	1	IL16	nonsynonymous SNV	COSM1629706;COSM1629707	2(liver)	.	.	.	.	.	.	.	.	.	.	.	.	.	.	.	.	.	.	.	.	.	.	.	.	.	.	.	.	.	.	.	.	.	.	.	.
15	81571229	rs1272832187	A	G	424.2	PASS	1	23	1	IL16	nonsynonymous SNV	.	.	.	.	.	.	.	.	.	.	.	.	.	.	.	.	.	.	.	.	.	.	.	.	.	.	.	.	.	.	.	.	.	.	.	.	.	.
15	81591817	rs536694090	T	C	2769.8	PASS	1	1059	1	IL16	nonsynonymous SNV	.	.	.	.	.	.	.	0.0002	.	.	.	.	0.001	0.0003	0	0	0	0	0	0	0.0024	.	.	.	.	.	0.0002	0	0	0	0	0	8.95e-06	0	0.0019	.	.	.
15	81598340	.	A	C	1395.8	PASS	1	182	1	IL16	nonsynonymous SNV	.	.	.	.	.	.	.	.	.	.	.	.	.	.	.	.	.	.	.	.	.	.	.	.	.	.	.	.	.	.	.	.	.	.	.	.	.	.
15	88420216	.	G	T	389.5	PASS	1	4136095	1	NTRK3	nonsynonymous SNV	.	.	.	.	.	.	.	.	.	.	.	.	.	.	.	.	.	.	.	.	.	.	.	.	.	.	.	.	.	.	.	.	.	.	.	.	.	.
15	88472622	rs139392904	G	A	521.7	PASS	1	4189998	1	NTRK3	nonsynonymous SNV	.	.	.	.	.	.	.	0.0002	.	.	0.001	.	.	0.0007	0	0.0003	0	0.0002	0.0011	0.0011	0	0.0008	0.0002	0.001	.	.	0.0008	0	0.0004	0.014	0.0001	4.5e-05	0.0003	0.0011	0	0.0003	0	0
15	88576136	.	T	A	575.9	PASS	1	4115001	2	NTRK3	nonsynonymous SNV	.	.	.	.	.	.	.	.	.	.	.	.	.	.	.	.	.	.	.	.	.	.	.	.	.	.	.	.	.	.	.	.	.	.	.	.	.	.
15	89825056	rs144908351	A	G	599.7	PASS	4	034;1079;4158268;4177810	1,1,1,1	FANCI	nonsynonymous SNV	.	.	other	Fanconi_anemia	RCV000228956.3	MedGen:Orphanet:SNOMED_CT	C0015625:ORPHA84:30575002	0.0008	.	0.0029	.	0.001	0.001	0.0021	0.0003	0.0008	0	0.0012	0.0034	0.0022	0.0005	0.0024	0.0007	0.0033	0.011	.	0.0023	0.0005	0.0005	0.0023	0	0.0015	0.0041	0.0022	0.0004	0.0021	0.0011	0.0012
15	89862296	rs181860632	G	A	185.3	PASS	1	4194218	1	POLG	nonsynonymous SNV	.	.	other	not_provided	RCV000188603.3	MedGen	CN221809	0.0004	.	.	0.002	.	.	6.6e-05	9.65e-05	0.0002	0.0002	0	4.5e-05	0	0	.	.	.	.	.	3.66e-05	6.54e-05	8.93e-05	0	0.0001	0	2.69e-05	0	0	6.47e-05	0	0.0024
15	89866693	rs138457939	T	C	638.2	PASS	1	4190929	1	POLG	nonsynonymous SNV	.	.	Uncertain significance|Uncertain significance	not_specified|Progressive_sclerosing_poliodystrophy	RCV000188567.4|RCV000231376.1	MedGen|MedGen:OMIM:Orphanet:SNOMED_CT	CN169374|C0205710:203700:ORPHA726:20415001	0.0002	0.0008	.	.	.	.	0.0004	0.0011	8.67e-05	0	0	0.0004	0.0022	0.0002	0.0005	0.0011	0.0002	.	.	0.0003	0.001	0.0002	0	5.8e-05	0	0.0004	0.0015	0.0001	0.0005	0.001	0
15	89868870	rs113994096	G	A	404.9	PASS	5	060;141;770;4124542;4173863	1,1,1,1,1	POLG	nonsynonymous SNV	.	.	Pathogenic|Pathogenic|Pathogenic|Uncertain significance|other|Pathogenic|Pathogenic	Mitochondrial_DNA_depletion_syndrome_4B\x2c_MNGIE_type|Mitochondrial_DNA_depletion_syndrome_1_(MNGIE_type)|Cerebellar_ataxia_infantile_with_progressive_external_ophthalmoplegia|not_specified|Progressive_sclerosing_poliodystrophy|Global_developmental_delay|not_provided	RCV000014456.28|RCV000020473.1|RCV000186576.4|RCV000193529.1|RCV000408293.1|RCV000415307.1|RCV000427845.1	MedGen:OMIM|MedGen:OMIM|MedGen:OMIM|MedGen|MedGen:OMIM:Orphanet:SNOMED_CT|Human_Phenotype_Ontology:MedGen|MedGen	C3150914:613662|C0872218:603041|C1850303:258450|CN169374|C0205710:203700:ORPHA726:20415001|HP:0001263:C4020875|CN221809	0.0008	.	0.0014	.	0.003	.	0.0017	0	0.0005	0	0.0003	0.0029	0.0011	0.0003	0.0022	.	0.0034	.	.	0.0015	0.0003	0.0009	0.002	0	0.0003	0.0026	0.002	0.0003	0.0015	0.0003	0
15	89873337	rs138929605	T	A	494.6	PASS	1	184	1	POLG	nonsynonymous SNV	.	.	Likely pathogenic|Uncertain significance|Uncertain significance	not_provided|Progressive_sclerosing_poliodystrophy|POLG-Related_Spectrum_Disorders	RCV000188643.2|RCV000231645.2|RCV000396333.1	MedGen|MedGen:OMIM:Orphanet:SNOMED_CT|MedGen	CN221809|C0205710:203700:ORPHA726:20415001|CN239393	0.0002	.	.	.	0.001	.	0.0004	0	8.65e-05	0	0.0002	0.0007	0	0	0.0004	.	0.0006	.	.	0.0004	6.54e-05	0.0001	0	0	0.0003	0.0007	0.0002	0	0.0002	0	0
15	89876490	.	G	T	163.6	PASS	1	1424	1	POLG	nonsynonymous SNV	.	.	.	.	.	.	.	.	.	.	.	.	.	.	.	.	.	.	.	.	.	.	.	.	.	.	.	.	.	.	.	.	.	.	.	.	.	.
15	89876658	rs139599587	G	A	284.4	PASS	1	4181460	1	POLG	nonsynonymous SNV	.	.	Uncertain significance|Uncertain significance	not_specified|Progressive_sclerosing_poliodystrophy	RCV000188685.1|RCV000461638.1	MedGen|MedGen:OMIM:Orphanet:SNOMED_CT	CN169374|C0205710:203700:ORPHA726:20415001	0.0008	0.0023	.	.	.	0.001	0.0002	0.0009	0	0	0	0	0	0.0008	0.0004	0.0011	.	.	.	0.0002	0.0008	0.0001	0	0	0	0	0.0002	0.0008	0.0002	0.0008	0
15	90633791	rs139512088	A	G	321.4	PASS	1	4142761	1	IDH2	nonsynonymous SNV	.	.	.	.	.	.	.	0.0002	.	0.0014	.	.	.	3.3e-05	0	0.0002	0	0	3e-05	0	0	0.0002	.	0.0002	.	.	6.09e-05	0	0.0002	0	0	0	7.16e-05	0.0002	0	.	.	.
15	91145559	rs147681624	G	A	680.8	PASS	1	4105746	1	CRTC3	nonsynonymous SNV	.	.	.	.	.	.	.	0.0002	.	.	.	0.001	.	0.0002	0	0	0	0	0.0003	0	0.0002	0.0002	.	0.0002	.	.	0.0001	0	0	0	0	0	0.0003	0	0.0002	3.23e-05	0	0
15	91147652	rs145024567	G	A	1261.5	PASS	3	189;366;811	1,1,1	CRTC3	nonsynonymous SNV	.	.	.	.	.	.	.	0.001	0.003	.	.	0.001	.	0.0004	0.003	0.0003	0	0	0.0001	0	0	0.0008	0.002	0.0001	.	.	0.0003	0.0026	0.0005	0	0	0	0.0002	0.0005	0	0.0006	0.0019	0
15	91181748	.	C	A	70.8	PASS	1	270	1	CRTC3	nonsynonymous SNV	.	.	.	.	.	.	.	.	.	.	.	.	.	.	.	.	.	.	.	.	.	.	.	.	.	.	.	.	.	.	.	.	.	.	.	.	.	.
15	91184404	rs150890712	G	A	373.5	PASS	1	4110378	1	CRTC3	nonsynonymous SNV	.	.	.	.	.	.	.	.	.	.	.	.	.	.	.	.	.	.	.	.	.	0.0001	.	0.0001	.	.	.	.	.	.	.	.	.	.	.	.	.	.
15	91290633	rs144706057	T	C	396.3	PASS	4	323;4163639;4177406;4193278	1,1,1,1	BLM	nonsynonymous SNV	.	.	Uncertain significance|other	not_specified|Bloom_syndrome	RCV000115279.2|RCV000210906.4	MedGen|MedGen:OMIM:Orphanet:SNOMED_CT	CN169374|C0005859:210900:ORPHA125:4434006	0.0004	.	.	.	0.002	.	0.0017	0.0006	0.0003	0	0.0004	0.0032	0.0015	0	0.0015	0.0009	0.0019	.	.	0.0011	0.0004	0.0005	0	0	0.0003	0.0022	0.0006	3.32e-05	0.001	0.0003	0
15	91308570	rs146077918	C	T	1435.2	PASS	7	004;279;351;676;4179894;4184011;4188800	1,1,1,1,1,1,1	BLM	nonsynonymous SNV	COSM3505421	2(skin)	Likely benign|other	not_specified|Bloom_syndrome	RCV000115288.3|RCV000172805.1	MedGen|MedGen:OMIM:Orphanet:SNOMED_CT	CN169374|C0005859:210900:ORPHA125:4434006	0.001	.	.	.	0.004	0.001	0.0016	0.0004	0.0016	0	0.0003	0.0022	0.0022	0.0012	0.0016	0.0007	0.0021	.	.	0.0017	0.0005	0.0019	0.0005	0	0.0003	0.0025	0.0015	0.0014	0.0018	0.0005	0
15	91358499	.	C	T	1030.8	PASS	1	811	1	BLM	nonsynonymous SNV	.	.	.	.	.	.	.	.	.	.	.	.	.	.	.	.	.	.	.	.	.	.	.	.	.	.	.	.	.	.	.	.	.	.	.	.	.	.
15	91428312	rs1457673376	C	T	213.1	PASS	1	280	1	FES	nonsynonymous SNV	.	.	.	.	.	.	.	.	.	.	.	.	.	.	.	.	.	.	.	.	.	.	.	.	.	.	.	.	.	.	.	.	.	.	.	.	.	.
15	91436013	rs141708381	C	T	250.8	PASS	1	4179894	1	FES	nonsynonymous SNV	.	.	.	.	.	.	.	.	.	.	.	.	.	.	.	.	.	.	.	.	.	0.0001	.	0.0001	.	.	.	.	.	.	.	.	.	.	.	.	.	.
15	93467774	.	G	A	381.5	PASS	1	4120879	1	CHD2	nonsynonymous SNV	.	.	.	.	.	.	.	.	.	.	.	.	.	.	.	.	.	.	.	.	.	.	.	.	.	.	.	.	.	.	.	.	.	.	.	.	.	.
15	93485169	.	A	T	414.6	PASS	1	4190784	1	CHD2	nonsynonymous SNV	.	.	.	.	.	.	.	.	.	.	.	.	.	.	.	.	.	.	.	.	.	.	.	.	.	.	.	.	.	.	.	.	.	.	.	.	.	.
15	93563356	rs1365608167	A	G	75.6	PASS	1	148	1	CHD2	nonsynonymous SNV	.	.	.	.	.	.	.	.	.	.	.	.	.	.	.	.	.	.	.	.	.	.	.	.	.	.	.	.	.	.	.	.	.	.	.	.	.	.
15	93567735	rs1486760399	C	T	716.9	PASS	1	773	1	CHD2	nonsynonymous SNV	COSM966723	1(endometrium)	.	.	.	.	.	.	.	.	.	.	.	.	.	.	.	.	.	.	.	.	.	.	.	.	.	.	.	.	.	.	.	.	.	.	.	.
15	99434811	.	G	T	303.9	PASS	1	4145391	1	IGF1R	nonsynonymous SNV	.	.	.	.	.	.	.	.	.	.	.	.	.	.	.	.	.	.	.	.	.	.	.	.	.	.	.	.	.	.	.	.	.	.	.	.	.	.
15	99442765	rs45445894	G	A	478.4	PASS	2	1534;785	1,1	IGF1R	nonsynonymous SNV	.	.	.	.	.	.	.	0.0014	0.003	0.0029	.	0.001	.	0.0005	0.0047	0.0007	0	0	7.49e-05	0.0011	0	0.0023	0.0068	.	.	.	0.0006	0.0056	0.0011	0.0001	0	0	8.95e-05	0.0011	0	0.0015	0.0048	0.0012
16	339473	.	A	T	391.7	PASS	1	882	1	AXIN1	nonsynonymous SNV	.	.	.	.	.	.	.	.	.	.	.	.	.	.	.	.	.	.	.	.	.	.	.	.	.	.	.	.	.	.	.	.	.	.	.	.	.	.
16	2096239	rs150766139	G	A	2252.3	PASS	2	345;4119463	1,1	NTHL1	stopgain	.	.	Pathogenic	Familial_adenomatous_polyposis_3	RCV000172911.3	MedGen:OMIM	CN231254:616415	0.0004	.	.	.	0.002	.	0.0015	0.0002	0.0004	0	0.0036	0.0023	0.0011	0.0001	0.0008	0.0005	0.001	.	.	0.0014	0.0001	0.0007	0.0004	0	0.0038	0.002	0.0015	0.0002	0.0015	0.0006	0
16	2112537	.	T	G	169.6	PASS	1	4138464	1	TSC2	nonsynonymous SNV	.	.	.	.	.	.	.	.	.	.	.	.	.	.	.	.	.	.	.	.	.	.	.	.	.	.	.	.	.	.	.	.	.	.	.	.	.	.
16	2112558	rs45484298	G	A	318.1	PASS	5	1066;312;366;4135099;4177856	1,1,1,1,1	TSC2	nonsynonymous SNV	.	.	Likely benign|Likely benign|Likely benign|Likely benign|Uncertain significance|other	not_provided|Tuberous_sclerosis_syndrome|not_specified|Hereditary_cancer-predisposing_syndrome|Hirschsprung_disease_1|Tuberous_sclerosis_2	RCV000034643.6|RCV000054863.2|RCV000122204.6|RCV000163424.1|RCV000201296.1|RCV000227708.3	MedGen|MedGen:Orphanet:SNOMED_CT|MedGen|MedGen:SNOMED_CT|MedGen:OMIM|MedGen:OMIM	CN221809|C0041341:ORPHA805:7199000|CN169374|C0027672:699346009|C2931876:142623|C1860707:613254	0.0004	.	0.0014	.	0.001	.	0.0008	0.0004	0.0006	0.0001	0	0.0012	0.0015	7.43e-05	0.0012	0.0002	0.0016	.	0.0082	0.0007	0.0001	0.0012	0.0006	5.82e-05	0.0001	0.001	0.0007	0.0001	0.0009	0.0002	0
16	2120487	rs1800729	G	A	552.6	PASS	8	015;1507;166;173;297;809;830;1464	1,1,1,1,1,1,1,1	TSC2	nonsynonymous SNV	COSM5019065;COSM5019066	1(soft_tissue)	Benign|Likely benign|other|Benign|Benign	not_provided|Tuberous_sclerosis_syndrome|not_specified|Hereditary_cancer-predisposing_syndrome|Tuberous_sclerosis_2	RCV000034646.5|RCV000054859.2|RCV000122209.6|RCV000129673.2|RCV000204294.3	MedGen|MedGen:Orphanet:SNOMED_CT|MedGen|MedGen:SNOMED_CT|MedGen:OMIM	CN221809|C0041341:ORPHA805:7199000|CN169374|C0027672:699346009|C1860707:613254	0.0008	.	0.0029	.	0.002	.	0.0017	0.0006	0.0007	0	0.0003	0.0028	0	0	0.0027	0.0011	0.0035	0.011	.	0.002	0.0006	0.0005	0	0	0.0005	0.0039	0.0013	3.25e-05	0.0023	0.0006	0
16	2124321	rs45517238	C	A	273.8	PASS	2	174;186	1,1	TSC2	nonsynonymous SNV	.	.	Likely benign|Likely benign|Likely benign|other|Benign	not_provided|Tuberous_sclerosis_syndrome|Hereditary_cancer-predisposing_syndrome|not_specified|Tuberous_sclerosis_2	RCV000034649.4|RCV000054857.2|RCV000163390.1|RCV000176271.3|RCV000204134.3	MedGen|MedGen:Orphanet:SNOMED_CT|MedGen:SNOMED_CT|MedGen|MedGen:OMIM	CN221809|C0041341:ORPHA805:7199000|C0027672:699346009|CN169374|C1860707:613254	0.0002	.	.	.	.	0.001	0.0006	0	0.0003	0	0	0.0009	0	0.0001	0.0008	.	0.0013	.	.	0.0007	6.55e-05	0.0006	0	0	4.53e-05	0.0012	0.0009	0.0002	0.0004	0	0.0036
16	2136279	.	A	T	432.1	PASS	1	820	1	TSC2	nonsynonymous SNV	.	.	.	.	.	.	.	.	.	.	.	.	.	.	.	.	.	.	.	.	.	.	.	.	.	.	.	.	.	.	.	.	.	.	.	.	.	.
16	2137933	rs184892282	T	C	682.6	PASS	1	1543	1	TSC2	nonsynonymous SNV	.	.	.	.	.	.	.	.	.	.	.	.	.	.	.	.	.	.	.	.	.	.	.	.	.	.	.	.	.	.	.	.	.	.	.	.	.	.
16	2138096	rs45517391	C	T	722.3	PASS	1	723	1	TSC2	nonsynonymous SNV	.	.	Likely benign|Benign|Likely benign	Tuberous_sclerosis_syndrome|not_specified|Tuberous_sclerosis_2	RCV000043179.3|RCV000189943.3|RCV000229384.2	MedGen:Orphanet:SNOMED_CT|MedGen|MedGen:OMIM	C0041341:ORPHA805:7199000|CN169374|C1860707:613254	0.0008	0.0015	.	.	0.002	.	0.0003	0.0005	0.0007	0	0	0.0003	0.0022	0	0.0002	.	0.0003	0.011	.	0.0003	0.0004	0.0007	0	0	0	0.0004	0.0005	0	0.0002	0.0001	0
16	2138570	rs45517423	C	T	809.4	PASS	3	1290;1459;341	1,1,1	TSC2	nonsynonymous SNV	COSM87828	1(pancreas)	Likely benign|Likely benign|not provided|not provided|Uncertain significance|Uncertain significance|other|Benign	not_provided|Tuberous_sclerosis_syndrome|Lymphangiomyomatosis|Tuberous_sclerosis_syndrome|Tuberous_sclerosis_and_lymphangiomyomatosis|Hereditary_cancer-predisposing_syndrome|not_specified|Tuberous_sclerosis_2	RCV000034665.4|RCV000054862.2|RCV000055245.1|RCV000055245.1|RCV000148917.1|RCV000163344.1|RCV000178483.3|RCV000204788.3	MedGen|MedGen:Orphanet:SNOMED_CT|MedGen:OMIM:Orphanet:SNOMED_CT|MedGen:Orphanet:SNOMED_CT|MedGen|MedGen:SNOMED_CT|MedGen|MedGen:OMIM	CN221809|C0041341:ORPHA805:7199000|C0751674:606690:ORPHA538:73017001|C0041341:ORPHA805:7199000|CN221561|C0027672:699346009|CN169374|C1860707:613254	0.0008	.	.	.	0.003	0.001	0.0012	0.0002	0.0013	0	0.0008	0.0018	0.0035	0.0003	0.0013	0.0002	0.0019	.	.	0.0015	0.0004	0.0021	0.0034	0	0.0008	0.002	0.0018	0.0003	0.0009	0.0001	0.0012
16	2222227	.	G	C	223.3	PASS	1	762	1	TRAF7	nonsynonymous SNV	.	.	.	.	.	.	.	.	.	.	.	.	.	.	.	.	.	.	.	.	.	.	.	.	.	.	.	.	.	.	.	.	.	.	.	.	.	.
16	3640145	.	T	G	1577	PASS	1	626	1	SLX4	nonsynonymous SNV	.	.	.	.	.	.	.	.	.	.	.	.	.	.	.	.	.	.	.	.	.	.	.	.	.	.	.	.	.	.	.	.	.	.	.	.	.	.
16	3820773	rs142047649	G	A	324.3	PASS	1	4186613	1	CREBBP	nonsynonymous SNV	COSM96413	1(breast);1(haematopoietic_and_lymphoid_tissue);1(soft_tissue);2(lung)	Benign|Likely benign	not_specified|not_provided	RCV000081040.6|RCV000429335.1	MedGen|MedGen	CN169374|CN221809	0.0004	.	.	.	0.002	.	0.0008	0.0002	0.0004	0	0	0.0014	0.0011	0	0.0014	0.0005	0.0019	.	0.0082	0.001	0.0002	0.0006	0	0	0.0001	0.0019	0.0011	0	0.0011	0.0005	0.0012
16	9857107	.	C	T	426.6	PASS	1	39	1	GRIN2A	nonsynonymous SNV	.	.	.	.	.	.	.	.	.	.	.	.	.	.	.	.	.	.	.	.	.	.	.	.	.	.	.	.	.	.	.	.	.	.	.	.	.	.
16	9857574	rs145063086	G	C	644.6	PASS	1	577	1	GRIN2A	nonsynonymous SNV	COSM107888	1(skin)	other|Likely benign|Uncertain significance	not_specified|Epilepsy\x2c_focal\x2c_with_speech_disorder_and_with_or_without_mental_retardation|Focal_epilepsy	RCV000187665.5|RCV000309897.1|RCV000417003.1	MedGen|MedGen:OMIM|MedGen:SNOMED_CT	CN169374|C1832814:245570|C0014547:29753000	0.0002	.	.	.	0.001	.	0.0005	0.0003	0.0002	0	0.0002	0.0009	0	0	0.0008	0.0002	0.001	.	.	0.0006	6.54e-05	0.0003	0	0	0.0004	0.0011	0.0005	0	0.0005	0.0003	0
16	9857761	.	A	G	447.1	PASS	1	1096	1	GRIN2A	nonsynonymous SNV	.	.	.	.	.	.	.	.	.	.	.	.	.	.	.	.	.	.	.	.	.	.	.	.	.	.	.	.	.	.	.	.	.	.	.	.	.	.
16	9923476	.	G	C	474.3	PASS	1	49	1	GRIN2A	nonsynonymous SNV	.	.	.	.	.	.	.	.	.	.	.	.	.	.	.	.	.	.	.	.	.	.	.	.	.	.	.	.	.	.	.	.	.	.	.	.	.	.
16	11000754	.	C	T	743.4	PASS	1	4	1	CIITA	nonsynonymous SNV	.	.	.	.	.	.	.	.	.	.	.	.	.	.	.	.	.	.	.	.	.	.	.	.	.	.	.	.	.	.	.	.	.	.	.	.	.	.
16	12492338	.	G	T	1984.9	PASS	1	777	1	SNX29	nonsynonymous SNV	.	.	.	.	.	.	.	.	.	.	.	.	.	.	.	.	.	.	.	.	.	.	.	.	.	.	.	.	.	.	.	.	.	.	.	.	.	.
16	14022003	rs141101671	G	A	628	PASS	1	4167925	1	ERCC4	nonsynonymous SNV	.	.	.	.	.	.	.	0.0002	.	0.0014	.	.	.	8.24e-05	0	0.0002	0	0	0.0001	0	0	0.0003	.	0.0005	.	.	0.0001	0	0.0003	0.0002	0	0	0.0001	0.0007	0	3.23e-05	0	0
16	14038627	.	A	G	1194.2	PASS	1	854	1	ERCC4	nonsynonymous SNV	.	.	.	.	.	.	.	.	.	.	.	.	.	.	.	.	.	.	.	.	.	.	.	.	.	.	.	.	.	.	.	.	.	.	.	.	.	.
16	14041608	.	A	G	1120.2	PASS	1	116	1	ERCC4	nonsynonymous SNV	.	.	.	.	.	.	.	.	.	.	.	.	.	.	.	.	.	.	.	.	.	.	.	.	.	.	.	.	.	.	.	.	.	.	.	.	.	.
16	15808909	.	C	G	224.7	PASS	1	4138464	1	MYH11	nonsynonymous SNV	.	.	.	.	.	.	.	.	.	.	.	.	.	.	.	.	.	.	.	.	.	.	.	.	.	.	.	.	.	.	.	.	.	.	.	.	.	.
16	15814758	.	C	G	779	PASS	1	4177842	1	MYH11	nonsynonymous SNV	.	.	.	.	.	.	.	.	.	.	.	.	.	.	.	.	.	.	.	.	.	.	.	.	.	.	.	.	.	.	.	.	.	.	.	.	.	.
16	15814814	rs111854563	G	A	732.4	PASS	2	1472;4167925	1,1	MYH11	nonsynonymous SNV	.	.	Likely benign|Uncertain significance|Likely benign	Thoracic_aortic_aneurysm_and_aortic_dissection|not_specified|Aortic_aneurysm\x2c_familial_thoracic_4	RCV000157333.3|RCV000212723.2|RCV000473652.1	MedGen:Orphanet|MedGen|MedGen:OMIM	CN118826:ORPHA91387|CN169374|C1851504:132900	0.0002	.	.	.	0.001	.	0.0007	0	0	0.0001	0.0011	0.0012	0	0	0.0005	.	0.0008	.	.	0.0007	0.0001	0	0	5.8e-05	0.0012	0.0012	0.0007	0	0.0006	0	0
16	15814883	rs137934837	C	T	742.4	PASS	6	116;387;510;664;676;176	1,1,1,1,1,1	MYH11	nonsynonymous SNV	.	.	Uncertain significance|other|Likely benign	Thoracic_aortic_aneurysm_and_aortic_dissection|Aortic_aneurysm\x2c_familial_thoracic_4|not_specified	RCV000157332.4|RCV000227161.3|RCV000417390.1	MedGen:Orphanet|MedGen:OMIM|MedGen	CN118826:ORPHA91387|C1851504:132900|CN169374	0.0014	0.0008	0.0014	0.002	.	0.0031	0.0023	0.0006	0.0021	0.001	0.0002	0.003	0.0033	0.0024	0.0016	0.0005	0.0022	0.011	.	0.0022	0.0005	0.0016	0.003	0.0012	0.0002	0.0031	0.0031	0.0021	0.0017	0.0006	0.0036
16	15818143	rs112467954	C	T	1937.8	PASS	3	380;654;770	1,1,1	MYH11	nonsynonymous SNV	.	.	Uncertain significance|Uncertain significance|Uncertain significance	not_specified|Thoracic_aortic_aneurysm_and_aortic_dissection|Aortic_aneurysm\x2c_familial_thoracic_4	RCV000182517.3|RCV000252216.1|RCV000466453.1	MedGen|MedGen:Orphanet|MedGen:OMIM	CN169374|CN118826:ORPHA91387|C1851504:132900	0.0006	.	.	.	0.003	.	0.0004	9.61e-05	0.0008	0	0	0.0005	0	0	0.0006	0.0002	0.0008	.	.	0.0005	0.0002	0.0006	0.0001	0	0	0.0008	0.0005	0	0.0004	0.0001	0
16	15818262	rs1401689647	G	A	387.4	PASS	1	4158268	1	MYH11	nonsynonymous SNV	.	.	.	.	.	.	.	.	.	.	.	.	.	.	.	.	.	.	.	.	.	.	.	.	.	.	.	.	.	.	.	.	.	.	.	.	.	.
16	15818780	rs7196804	C	T	932.9	PASS	2	1062;267	1,1	MYH11	nonsynonymous SNV	.	.	Benign|Uncertain significance|Likely benign|Likely benign	Thoracic_aortic_aneurysm_and_aortic_dissection|Lissencephaly\x2c_Recessive|not_specified|Aortic_aneurysm\x2c_familial_thoracic_4	RCV000182512.3|RCV000398079.1|RCV000417389.1|RCV000459113.1	MedGen:Orphanet|MedGen|MedGen|MedGen:OMIM	CN118826:ORPHA91387|CN239458|CN169374|C1851504:132900	0.0012	0.0045	.	.	.	.	0.0007	0.0044	0.0011	0	0	0.0004	0	0	0.0027	0.0066	0.0007	.	.	0.0008	0.0046	0.0015	0.0037	0	0	0.0003	0.0015	0	0.0021	0.0062	0.0012
16	15844048	rs111404182	G	A	339.2	PASS	1	599	1	MYH11	nonsynonymous SNV	COSM2127188;COSM2127189	1(oesophagus);1(prostate)	Uncertain significance|Uncertain significance	Aortic_aneurysm\x2c_familial_thoracic_4|Thoracic_aortic_aneurysm_and_aortic_dissection	RCV000148694.2|RCV000252564.1	MedGen:OMIM|MedGen:Orphanet	C1851504:132900|CN118826:ORPHA91387	0.0002	.	.	.	0.001	.	0.0006	0	0.0008	0	0	0.0008	0.0033	0.0001	0.0002	.	0.0003	.	.	0.0007	6.53e-05	0.001	0.0014	0	4.49e-05	0.001	0.0015	0.0002	0.0005	0.0001	0
16	15872688	rs150759461	G	A	333.1	PASS	1	4100636	1	MYH11	nonsynonymous SNV	COSM3887969;COSM3887970	1(skin)	Likely benign|Uncertain significance|other|Likely benign|Uncertain significance	Altered_myosin_contractile_function|Loeys-Dietz_syndrome|not_specified|Aortic_aneurysm\x2c_familial_thoracic_4|Thoracic_aortic_aneurysm_and_aortic_dissection	RCV000148692.1|RCV000157329.1|RCV000182546.3|RCV000206298.3|RCV000251088.1	MedGen|MedGen:Orphanet:SNOMED_CT|MedGen|MedGen:OMIM|MedGen:Orphanet	CN221557|C2697932:ORPHA60030:446263001|CN169374|C1851504:132900|CN118826:ORPHA91387	0.0006	.	.	.	0.003	.	0.0019	0.0005	0.0002	0	0.0038	0.003	0.0022	6.06e-05	0.0025	0.0009	0.0033	.	0.016	0.0018	0.0005	8.93e-05	0	0	0.0029	0.0031	0.002	0	0.0016	0.0006	0.0012
16	23635348	rs45478192	A	C	354.2	PASS	2	4133263;4166151	1,1	PALB2	nonsynonymous SNV	.	.	other|Uncertain significance|other|Likely benign|other	Familial_cancer_of_breast|Pancreatic_cancer_3|Hereditary_cancer-predisposing_syndrome|Fanconi_anemia|not_specified	RCV000114561.8|RCV000114562.1|RCV000116092.7|RCV000306515.1|RCV000417395.1	MedGen:OMIM:Orphanet:SNOMED_CT|MedGen:OMIM|MedGen:SNOMED_CT|MedGen:Orphanet:SNOMED_CT|MedGen	C0346153:114480:ORPHA227535:254843006|C3150547:613348|C0027672:699346009|C0015625:ORPHA84:30575002|CN169374	0.0008	0.0008	0.0014	.	0.002	.	0.001	0.0003	0.0005	0.0001	0.0003	0.0016	0	0	0.0015	.	0.0023	.	.	0.001	0.0003	0.0007	0.0018	0	4.49e-05	0.0017	0.0005	0	0.0011	0.0007	0
16	23637676	.	A	G	1304.5	PASS	1	669	1	PALB2	nonsynonymous SNV	.	.	.	.	.	.	.	.	.	.	.	.	.	.	.	.	.	.	.	.	.	.	.	.	.	.	.	.	.	.	.	.	.	.	.	.	.	.
16	24166176	rs369508594	A	T	301.7	PASS	1	1465	1	PRKCB	nonsynonymous SNV	.	.	.	.	.	.	.	0.0004	.	.	.	.	0.002	0.0004	0.0006	0.0001	0	0	3.51e-05	0.0013	0.0021	0.0002	0.0005	.	.	.	0.0003	0.0003	3e-05	0	0	0	5.44e-05	0.0002	0.0018	9.69e-05	0.0002	0
16	27455970	rs201566028	G	C	315.5	PASS	1	1266	1	IL21R	nonsynonymous SNV	.	.	.	.	.	.	.	0.001	.	0.0043	.	0.002	.	0.0003	0	0.0013	0	0	0.0002	0	0	0.0001	.	0.0001	.	.	0.0003	7.18e-05	0.0014	0.0023	0	0	0.0001	0.0004	0	0.0001	0	0.0036
16	27460521	rs267604484	G	A	1454.7	PASS	1	1319	1	IL21R	nonsynonymous SNV	.	.	.	.	.	.	.	.	.	.	.	.	.	.	.	.	.	.	.	.	.	.	.	.	.	.	.	.	.	.	.	.	.	.	.	.	.	.
16	30133311	rs200617125	C	T	424.7	PASS	2	1328;1101	1,1	MAPK3	nonsynonymous SNV	COSM3111839;COSM3111840;COSM4259390	1(large_intestine)	.	.	.	.	.	0.0004	.	0.0029	.	.	.	0.0003	9.75e-05	0.0005	0	0	0.0004	0	0	0.0002	.	0.0002	.	.	0.0004	0.0003	0.0008	0.0001	0	0	0.0006	0.0004	0	0.0005	0.0001	0.0048
16	30977081	rs376474875	C	G	1202.8	PASS	1	544	1	SETD1A	nonsynonymous SNV	.	.	.	.	.	.	.	0.0002	.	.	.	0.001	.	4.77e-05	0	0	0	0	8.47e-05	0	0	0.0001	.	0.0001	.	.	5.77e-05	0	3.25e-05	0	0	0	9.95e-05	0.0004	0	3.32e-05	0	0
16	31202326	.	A	C	534.6	PASS	1	783	1	FUS	nonsynonymous SNV	.	.	.	.	.	.	.	.	.	.	.	.	.	.	.	.	.	.	.	.	.	.	.	.	.	.	.	.	.	.	.	.	.	.	.	.	.	.
16	50813603	.	C	T	937.5	PASS	1	4186613	1	CYLD	nonsynonymous SNV	.	.	.	.	.	.	.	.	.	.	.	.	.	.	.	.	.	.	.	.	.	.	.	.	.	.	.	.	.	.	.	.	.	.	.	.	.	.
16	64984724	.	C	T	830.5	PASS	1	4186613	1	CDH11	nonsynonymous SNV	.	.	.	.	.	.	.	.	.	.	.	.	.	.	.	.	.	.	.	.	.	.	.	.	.	.	.	.	.	.	.	.	.	.	.	.	.	.
16	67070552	.	C	G	533.6	PASS	1	283	1	CBFB	nonsynonymous SNV	.	.	.	.	.	.	.	.	.	.	.	.	.	.	.	.	.	.	.	.	.	.	.	.	.	.	.	.	.	.	.	.	.	.	.	.	.	.
16	67670682	rs145727304	C	T	318.7	PASS	4	1226;4120193;4124188;4133511	1,1,1,1	CTCF	nonsynonymous SNV	COSM4169929	1(haematopoietic_and_lymphoid_tissue)	Uncertain significance|Likely benign	not_specified|not_provided	RCV000193895.1|RCV000427860.1	MedGen|MedGen	CN169374|CN221809	0.0002	.	0.0014	.	.	.	0.0021	0.0009	0.0006	0	0.0005	0.0036	0.0011	0	0.0044	0.0014	0.0059	.	.	0.0023	0.0009	0.0008	0	0	0.0003	0.0045	0.0017	0	0.0029	0.0014	0.0012
16	67671597	.	C	G	260.6	PASS	1	1179	1	CTCF	nonsynonymous SNV	.	.	.	.	.	.	.	.	.	.	.	.	.	.	.	.	.	.	.	.	.	.	.	.	.	.	.	.	.	.	.	.	.	.	.	.	.	.
16	68847228	.	G	A	960.2	PASS	1	117	1	CDH1	nonsynonymous SNV	.	.	.	.	.	.	.	.	.	.	.	.	.	.	.	.	.	.	.	.	.	.	.	.	.	.	.	.	.	.	.	.	.	.	.	.	.	.
16	68847305	.	G	C	207.7	PASS	1	1262	1	CDH1	nonsynonymous SNV	.	.	.	.	.	.	.	.	.	.	.	.	.	.	.	.	.	.	.	.	.	.	.	.	.	.	.	.	.	.	.	.	.	.	.	.	.	.
16	69334814	.	G	A	543.1	PASS	1	1472	1	SNTB2	nonsynonymous SNV	.	.	.	.	.	.	.	.	.	.	.	.	.	.	.	.	.	.	.	.	.	.	.	.	.	.	.	.	.	.	.	.	.	.	.	.	.	.
16	72822288	.	G	A	516.9	PASS	1	1191	1	ZFHX3	nonsynonymous SNV	.	.	.	.	.	.	.	.	.	.	.	.	.	.	.	.	.	.	.	.	.	.	.	.	.	.	.	.	.	.	.	.	.	.	.	.	.	.
16	72822351	rs62639993	G	A	963.3	PASS	2	312;596	1,1	ZFHX3	nonsynonymous SNV	.	.	.	.	.	.	.	0.0002	.	.	.	0.001	.	0.0004	0.0002	0.0008	0	0.0002	0.0004	0	0.0001	0.0002	.	0.0003	.	.	0.0004	6.54e-05	0.001	0	0	0	0.0005	0.0007	6.5e-05	0.0002	0.0001	0
16	72828009	rs185694644	C	T	591.7	PASS	1	1534	1	ZFHX3	nonsynonymous SNV	.	.	.	.	.	.	.	0.0002	.	.	.	0.001	.	3.3e-05	0	8.64e-05	0	0	4.5e-05	0	0	0.0001	.	0.0001	.	.	3.66e-05	0	2.98e-05	0	0	0	7.16e-05	0	0	6.46e-05	0	0
16	72828629	rs1324649054	T	G	399.6	PASS	1	4167381	1	ZFHX3	nonsynonymous SNV	.	.	.	.	.	.	.	.	.	.	.	.	.	.	.	.	.	.	.	.	.	.	.	.	.	.	4.06e-06	0	0	0	0	0	8.95e-06	0	0	.	.	.
16	72828890	rs141564201	T	C	1083.7	PASS	1	1054	1	ZFHX3	nonsynonymous SNV	.	.	.	.	.	.	.	0.0004	.	0.0014	.	0.001	.	0.0007	0.0002	0.0017	0	0.0006	0.0009	0	0	0.0008	0.0002	0.0012	.	.	0.0007	0.0003	0.0014	0.0007	0	0.0004	0.0009	0.0011	0	0.0008	0.0002	0.0024
16	72831132	rs148334947	C	A	831.1	PASS	7	276;447;757;1191;523;4100314;4113191	1,1,1,1,1,1,1	ZFHX3	nonsynonymous SNV	.	.	.	.	.	.	.	0.0004	.	.	.	0.002	.	0.0009	0.0003	0.0004	0	0.0002	0.0015	0.0011	0	0.0011	0.0002	0.0015	.	.	0.0011	0.0002	0.0012	0.0001	0	0.0002	0.0019	0.0015	0	0.0008	0.0002	0.0036
16	72831151	rs181054801	G	T	772.3	PASS	2	333;591	1,1	ZFHX3	nonsynonymous SNV	.	.	.	.	.	.	.	0.0008	.	.	.	0.004	.	0.0002	0	0.0003	0	0	0.0003	0	0	0.0002	.	0.0002	.	.	0.0002	0	0.0003	0.0001	0	0	0.0003	0.0002	0	6.46e-05	0	0
16	72831278	.	T	C	496.3	PASS	1	567	1	ZFHX3	nonsynonymous SNV	.	.	.	.	.	.	.	.	.	.	.	.	.	.	.	.	.	.	.	.	.	.	.	.	.	.	.	.	.	.	.	.	.	.	.	.	.	.
16	72831629	rs117283459	G	A	907.4	PASS	3	166;383;4107990	1,1,1	ZFHX3	nonsynonymous SNV	.	.	.	.	.	.	.	0.001	0.0008	0.0029	.	0.002	.	0.001	0.0004	0.0009	0	0.0003	0.0016	0	6.06e-05	0.0012	0.0007	0.0014	0.011	.	0.0009	0.0004	0.0007	0.0003	0	0.0003	0.0015	0.0013	6.5e-05	0.0005	0.0002	0
16	72991376	.	C	A	569.3	PASS	1	664	1	ZFHX3	nonsynonymous SNV	.	.	.	.	.	.	.	.	.	.	.	.	.	.	.	.	.	.	.	.	.	.	.	.	.	.	.	.	.	.	.	.	.	.	.	.	.	.
16	72991395	rs148618101	C	G	398.2	PASS	1	52	1	ZFHX3	nonsynonymous SNV	COSM4170072	1(haematopoietic_and_lymphoid_tissue)	.	.	.	.	.	0.0006	.	0.0014	.	0.002	.	0.0012	0.0003	0.0011	0	0	0.0019	0.0011	0.0004	0.0013	0.0005	0.0017	.	.	0.0013	0.0002	0.0013	0.0159	0	0	0.0009	0.0022	0.0006	0.0007	0.0002	0.0024
16	72992045	rs544260229	G	A	294.8	PASS	2	1192;4177434	1,1	ZFHX3	nonsynonymous SNV	.	.	.	.	.	.	.	0.0002	.	.	.	0.001	.	1.66e-05	0	0	0	0	1.51e-05	0	6.06e-05	.	.	.	.	.	2.03e-05	0	0	0	0	0	8.98e-06	0	0.0001	.	.	.
16	72992378	rs147016640	G	C	708.8	PASS	2	757;4142605	1,1	ZFHX3	nonsynonymous SNV	.	.	.	.	.	.	.	0.0002	.	.	.	0.001	.	0.0002	0	8.64e-05	0	0	0.0003	0.0022	0	0.0002	.	0.0003	.	.	0.0002	0	5.96e-05	0.0006	0	0	0.0003	0.0002	0	0.0004	0.0002	0
16	74670264	.	G	A	353.5	PASS	1	4130865	1	RFWD3	nonsynonymous SNV	.	.	.	.	.	.	.	.	.	.	.	.	.	.	.	.	.	.	.	.	.	.	.	.	.	.	.	.	.	.	.	.	.	.	.	.	.	.
16	81892756	.	C	G	437.2	PASS	1	661	1	PLCG2	nonsynonymous SNV	.	.	.	.	.	.	.	.	.	.	.	.	.	.	.	.	.	.	.	.	.	.	.	.	.	.	.	.	.	.	.	.	.	.	.	.	.	.
16	81953174	rs1477576619	G	A	488.9	PASS	1	4109142	1	PLCG2	nonsynonymous SNV	.	.	.	.	.	.	.	.	.	.	.	.	.	.	.	.	.	.	.	.	.	.	.	.	.	.	.	.	.	.	.	.	.	.	.	.	.	.
16	81957106	rs142825971	A	G	492.7	PASS	1	4186812	1	PLCG2	nonsynonymous SNV	.	.	.	.	.	.	.	0.0012	.	.	.	0.002	0.0041	0.0014	0.0009	0.0006	0	0.002	0.0016	0	0.0018	0.0017	0.0003	0.0024	.	.	0.0014	0.0005	0.0002	0	0	0.0015	0.0019	0.0015	0.0022	0.002	0.0006	0.0012
16	81965151	rs200677528	G	C	533.6	PASS	1	51	1	PLCG2	nonsynonymous SNV	.	.	.	.	.	.	.	0.0002	.	0.0014	.	.	.	0.0001	0	8.64e-05	0	0	0.0002	0	0	0.0002	.	0.0004	.	0.0082	0.0002	0	8.94e-05	0.0042	0	0	1.79e-05	0.0005	0	3.23e-05	0	0
16	81968130	.	A	C	242.8	PASS	1	373	1	PLCG2	nonsynonymous SNV	.	.	.	.	.	.	.	.	.	.	.	.	.	.	.	.	.	.	.	.	.	.	.	.	.	.	.	.	.	.	.	.	.	.	.	.	.	.
16	88947187	rs150852720	C	T	425.7	PASS	1	122	1	CBFA2T3	nonsynonymous SNV	.	.	.	.	.	.	.	0.0002	.	0.0014	.	.	.	0.0003	0	0.0021	0	0	0.0003	0	0	0.0002	.	0.0004	.	.	0.0002	0	0.0006	0	7.02e-05	0	0.0002	0.0004	0	0.0002	0	0.0012
16	88947740	rs200173287	C	T	268.3	PASS	1	1371	1	CBFA2T3	nonsynonymous SNV	.	.	.	.	.	.	.	0.0004	.	.	.	0.002	.	0.0007	0.0002	0.0013	0	0	0.001	0	0	0.0004	.	0.0006	.	.	0.0005	9.04e-05	0.0008	0	0	0	0.0008	0.0009	3.67e-05	0.0003	0.0001	0.0012
16	88947826	.	C	G	344.3	PASS	1	4105105	1	CBFA2T3	nonsynonymous SNV	.	.	.	.	.	.	.	.	.	.	.	.	.	.	.	.	.	.	.	.	.	.	.	.	.	.	.	.	.	.	.	.	.	.	.	.	.	.
16	88952423	rs143704547	G	T	512.6	PASS	1	1196	1	CBFA2T3	nonsynonymous SNV	.	.	.	.	.	.	.	0.0004	0.0008	0.0014	.	.	.	0.0002	0	0.0019	0	0	9.48e-05	0	0.0002	.	.	.	.	.	5.94e-05	0.0001	0.0002	0	0	6.7e-05	2.87e-05	0	8.3e-05	3.23e-05	0	0
16	88952424	rs561624190	A	C	512.6	PASS	1	1196	1	CBFA2T3	nonsynonymous SNV	.	.	.	.	.	.	.	0.0004	0.0008	0.0014	.	.	.	0.0002	0	0.0018	0	0	9.38e-05	0	0.0002	.	.	.	.	.	5.93e-05	0.0001	0.0002	0	0	6.68e-05	2.86e-05	0	8.32e-05	3.24e-05	0	0
16	88967923	rs143043820	G	A	118	PASS	1	4104893	1	CBFA2T3	nonsynonymous SNV	COSM5989714	1(haematopoietic_and_lymphoid_tissue)	.	.	.	.	.	0.0002	.	.	.	.	0.001	0.0006	0	0	0	0	0.001	0	0.0006	0.0007	.	0.0011	.	.	0.0008	0	0	0.0029	0	5.55e-05	0.001	0.001	0.0006	0.0006	0.0003	0
16	89813080	.	C	T	88.8	PASS	1	294	1	FANCA	nonsynonymous SNV	.	.	.	.	.	.	.	.	.	.	.	.	.	.	.	.	.	.	.	.	.	.	.	.	.	.	.	.	.	.	.	.	.	.	.	.	.	.
16	89845385	.	G	T	270	PASS	1	664	1	FANCA	nonsynonymous SNV	.	.	.	.	.	.	.	.	.	.	.	.	.	.	.	.	.	.	.	.	.	.	.	.	.	.	.	.	.	.	.	.	.	.	.	.	.	.
17	1257610	.	C	T	197.9	PASS	1	4136095	1	YWHAE	nonsynonymous SNV	COSM5513234;COSM5513235	1(biliary_tract)	.	.	.	.	.	.	.	.	.	.	.	.	.	.	.	.	.	.	.	.	.	.	.	.	.	.	.	.	.	.	.	.	.	.	.	.
17	5064855	rs143126839	C	T	1125	PASS	2	1195;859	1,1	USP6	nonsynonymous SNV	.	.	.	.	.	.	.	0.0002	.	.	.	0.001	.	0.0002	9.61e-05	0.0006	0	0	0.0001	0	0.0002	0.0001	0.0002	.	.	.	0.0002	0.0001	0.0004	0.0006	0	0	8.06e-05	0.0013	0.0002	9.68e-05	0.0001	0.0012
17	5253852	.	C	G	372.9	PASS	1	4171810	1	RABEP1	nonsynonymous SNV	.	.	.	.	.	.	.	.	.	.	.	.	.	.	.	.	.	.	.	.	.	.	.	.	.	.	.	.	.	.	.	.	.	.	.	.	.	.
17	5264884	rs558415422	G	A	289.9	PASS	1	111	1	RABEP1	nonsynonymous SNV	.	.	.	.	.	.	.	0.0002	.	.	.	0.001	.	0.0004	0	8.65e-05	0	0	4.5e-05	0.0011	0.0027	.	.	.	.	.	0.0004	0	2.98e-05	0	0	0	5.37e-05	0.0002	0.0028	3.23e-05	0	0
17	7480999	.	C	T	1774.2	PASS	1	302	1	EIF4A1	nonsynonymous SNV	.	.	.	.	.	.	.	.	.	.	.	.	.	.	.	.	.	.	.	.	.	.	.	.	.	.	.	.	.	.	.	.	.	.	.	.	.	.
17	7481749	.	C	A	1204	PASS	2	583;800	1,1	EIF4A1	nonsynonymous SNV	.	.	.	.	.	.	.	.	.	.	.	.	.	.	.	.	.	.	.	.	.	.	.	.	.	.	.	.	.	.	.	.	.	.	.	.	.	.
17	8044417	.	G	C	329.4	PASS	1	4158769	1	PER1	nonsynonymous SNV	.	.	.	.	.	.	.	.	.	.	.	.	.	.	.	.	.	.	.	.	.	.	.	.	.	.	.	.	.	.	.	.	.	.	.	.	.	.
17	8045136	rs145053802	G	A	179.7	PASS	1	4197438	1	PER1	nonsynonymous SNV	.	.	.	.	.	.	.	0.0004	.	0.0014	.	0.001	.	0.0008	0.0006	0.0004	0	0	0.0012	0.0011	0	0.0015	0.0007	0.002	.	0.016	0.0002	0	0.0001	0	0	0	0.0003	0.0002	0	0.0008	0.0003	0
17	8045629	rs1266421656	T	C	586.9	PASS	1	591	1	PER1	nonsynonymous SNV	.	.	.	.	.	.	.	.	.	.	.	.	.	.	.	.	.	.	.	.	.	.	.	.	.	.	.	.	.	.	.	.	.	.	.	.	.	.
17	8045714	rs112743620	C	T,A	227.2	PASS	2	4187640;4197155	1,1	PER1	nonsynonymous SNV	COSM5020554	1(soft_tissue)	.	.	.	.	.	0.001	.	0.0043	.	0.002	.	0.0006	0.0003	0.0004	0	0.0003	0.0009	0	0	.	.	.	.	.	0.0006	0.0003	0.0003	0	0	0.0004	0.0012	0.0006	0	0.0005	0.0001	0
17	8052595	rs140853060	G	C	1430.1	PASS	3	1312;149;884	1,1,1	PER1	nonsynonymous SNV	.	.	.	.	.	.	.	0.0006	.	.	.	0.003	.	0.0008	9.68e-05	0.0012	0	0	0.0012	0	0	0.0008	.	0.0012	.	.	0.0007	0.0001	0.0012	0.0005	0	0	0.0012	0.0005	0	0.0006	0.0003	0.0012
17	8053861	rs150803032	T	C	364	PASS	1	4113825	1	PER1	nonsynonymous SNV	.	.	.	.	.	.	.	0.0002	.	.	.	0.001	.	0.0004	0.0004	0	0	0	0.0007	0	0	0.0004	0.0002	0.0005	.	.	0.0003	0.0003	0	0	0	0	0.0007	0	0	0.0004	0.0002	0
17	9829968	rs545557656	G	A	535.3	PASS	1	383	1	GAS7	nonsynonymous SNV	.	.	.	.	.	.	.	0.0002	0.0008	.	.	.	.	4.13e-05	9.68e-05	0	0	0	6.01e-05	0	0	.	.	.	.	.	4.07e-05	0.0001	5.96e-05	0	0	0	4.48e-05	0.0002	0	.	.	.
17	15950289	rs1480267062	A	T	566.7	PASS	1	1425	1	NCOR1	nonsynonymous SNV	.	.	.	.	.	.	.	.	.	.	.	.	.	.	.	.	.	.	.	.	.	.	.	.	.	.	4.1e-06	6.54e-05	0	0	0	0	0	0	0	.	.	.
17	15961841	rs200158089	G	A	751.5	PASS	1	181	1	NCOR1	nonsynonymous SNV	.	.	.	.	.	.	.	0.0002	.	0.0014	.	.	.	7.41e-05	9.61e-05	0.0002	0	0	8.99e-05	0	0	0.0001	0.0002	.	.	.	6.09e-05	6.53e-05	0.0002	0	0	0	6.27e-05	0.0002	0	.	.	.
17	15971252	rs118021690	G	A	554.2	PASS	1	772	1	NCOR1	nonsynonymous SNV	.	.	.	.	.	.	.	0.0002	.	.	.	0.001	.	1.65e-05	0	0	0	0	3e-05	0	0	.	.	.	0.011	.	2.03e-05	0	0	0	5.8e-05	0	3.59e-05	0	0	.	.	.
17	15976786	rs200471424	T	G	649.7	PASS	1	4105746	1	NCOR1	nonsynonymous SNV	.	.	.	.	.	.	.	0.0002	.	.	.	0.001	.	8.24e-05	0	8.64e-05	0	0	0.0001	0	6.06e-05	0.0001	.	0.0001	.	.	0.0001	0	3.04e-05	0.0014	0	0	9.89e-05	0	0.0002	.	.	.
17	15978907	.	G	A	561.8	PASS	1	1290	1	NCOR1	nonsynonymous SNV	.	.	.	.	.	.	.	.	.	.	.	.	.	.	.	.	.	.	.	.	.	.	.	.	.	.	.	.	.	.	.	.	.	.	.	.	.	.
17	15983762	rs139706730	C	G	459.7	PASS	3	1346;4109808;4183924	1,1,1	NCOR1	nonsynonymous SNV	COSM5574213;COSM5574214	1(haematopoietic_and_lymphoid_tissue)	.	.	.	.	.	0.0002	.	.	.	0.001	.	0.0006	0.0003	0.0003	0	0.0002	0.0009	0.0011	0.0005	0.0004	0.0005	0.0003	.	.	0.0006	0.0001	0.0004	0	0	0.0004	0.001	0.0007	0.0006	0.0005	0	0
17	15995273	.	C	G	1180.8	PASS	1	772	1	NCOR1	nonsynonymous SNV	.	.	.	.	.	.	.	.	.	.	.	.	.	.	.	.	.	.	.	.	.	.	.	.	.	.	.	.	.	.	.	.	.	.	.	.	.	.
17	16001772	.	G	A	534.2	PASS	1	4102009	1	NCOR1	nonsynonymous SNV	.	.	.	.	.	.	.	.	.	.	.	.	.	.	.	.	.	.	.	.	.	.	.	.	.	.	.	.	.	.	.	.	.	.	.	.	.	.
17	16012204	.	T	C	593.5	PASS	1	4177406	1	NCOR1	nonsynonymous SNV	.	.	.	.	.	.	.	.	.	.	.	.	.	.	.	.	.	.	.	.	.	.	.	.	.	.	.	.	.	.	.	.	.	.	.	.	.	.
17	16029403	.	C	T	581.9	PASS	1	4175837	1	NCOR1	nonsynonymous SNV	.	.	.	.	.	.	.	.	.	.	.	.	.	.	.	.	.	.	.	.	.	.	.	.	.	.	.	.	.	.	.	.	.	.	.	.	.	.
17	17125849	rs747429545	T	G	236.1	PASS	1	788	1	FLCN	nonsynonymous SNV	.	.	.	.	.	.	.	.	.	.	.	.	.	.	.	.	.	.	.	.	.	.	.	.	.	.	.	.	.	.	.	.	.	.	.	.	.	.
17	20107762	rs35489815	A	C	1459.4	PASS	1	290	1	SPECC1	nonsynonymous SNV	.	.	.	.	.	.	.	.	.	.	.	.	.	.	.	.	.	.	.	.	.	.	.	.	.	.	.	.	.	.	.	.	.	.	.	.	.	.
17	20108476	rs202164673	T	A	2518.8	PASS	1	885	1	SPECC1	nonsynonymous SNV	COSM3736159	1(skin)	.	.	.	.	.	0.0002	.	.	.	0.001	.	0.0003	0	8.65e-05	0	0	0.0002	0.0011	0.0013	.	.	.	.	.	0.0002	0	2.98e-05	0.0001	0	4.48e-05	0.0001	0.0005	0.0013	.	.	.
17	20108795	rs377027470	G	A	1446.7	PASS	1	585	1	SPECC1	nonsynonymous SNV	COSM2798542;COSM5510885	1(biliary_tract)	.	.	.	.	.	0.0008	0.003	.	.	.	.	0.0001	0.001	0	0	0	0	0	0.0002	0.0002	0.0002	0.0001	.	.	0.0001	0.001	8.94e-05	0	0	0	2.69e-05	0.0002	6.5e-05	0.0004	0.0015	0
17	20163540	rs201980094	G	A	491	PASS	1	4197155	1	SPECC1	nonsynonymous SNV	.	.	.	.	.	.	.	0.0002	0.0008	.	.	.	.	0.0002	9.61e-05	0.0003	0	0	0.0001	0	0.0007	.	.	.	.	.	0.0002	0	5.96e-05	0	0	0	0.0001	0.0007	0.0007	6.46e-05	0	0
17	29676209	.	A	T	313	PASS	1	4186812	1	NF1	nonsynonymous SNV	.	.	.	.	.	.	.	.	.	.	.	.	.	.	.	.	.	.	.	.	.	.	.	.	.	.	.	.	.	.	.	.	.	.	.	.	.	.
17	29679412	rs148154172	C	T	481.7	PASS	1	1192	1	NF1	nonsynonymous SNV	COSM5019804;COSM5019803;COSM5019802	1(soft_tissue)	Uncertain significance|Likely benign|Likely benign	not_provided|Hereditary_cancer-predisposing_syndrome|Neurofibromatosis\x2c_type_1	RCV000034590.1|RCV000130730.3|RCV000199269.3	MedGen|MedGen:SNOMED_CT|MedGen:OMIM:Orphanet:SNOMED_CT	CN221809|C0027672:699346009|C0027831:162200:ORPHA636:92824003	.	.	.	.	.	.	0.0007	0	0.0006	0.0001	0.0002	0.0012	0.0022	0	0.0007	.	0.001	.	.	0.0008	0	0.0009	0.0094	0	4.49e-05	0.0006	0.0009	0	0.0003	0.0002	0.0012
17	29701073	.	A	G	594.6	PASS	1	821	1	NF1	nonsynonymous SNV	.	.	.	.	.	.	.	.	.	.	.	.	.	.	.	.	.	.	.	.	.	.	.	.	.	.	.	.	.	.	.	.	.	.	.	.	.	.
17	30264461	rs199728576	G	A	271.2	PASS	1	4108588	1	SUZ12	nonsynonymous SNV	.	.	.	.	.	.	.	0.0006	.	0.0014	.	0.002	.	0.0001	0	0.0045	0	0	0.0002	0	0	.	.	.	0.011	.	0.0006	0.0002	0.0008	0	0	0	0.001	0.0008	0	0.0004	0	0.0012
17	30325838	rs139363631	C	T	489.1	PASS	3	044;1165;1464	1,1,1	SUZ12	nonsynonymous SNV	.	.	.	.	.	.	.	0.0002	.	0.0014	.	.	.	0.0002	0.0001	0.0002	0	0	0.0003	0	0.0002	0.0005	.	0.0007	.	.	0.0003	0	0.0004	0.0013	0	0	0.0003	0.0002	0.0002	0.0001	0	0
17	30325868	rs557229254	A	G	241.5	PASS	1	1177	1	SUZ12	nonsynonymous SNV	.	.	.	.	.	.	.	0.0002	0.0008	.	.	.	.	8.38e-06	0.0001	0	0	0	0	0	0	.	.	.	.	.	4.08e-06	6.57e-05	0	0	0	0	0	0	0	.	.	.
17	34171111	.	T	C	2178.9	PASS	1	780	1	TAF15	nonsynonymous SNV	.	.	.	.	.	.	.	.	.	.	.	.	.	.	.	.	.	.	.	.	.	.	.	.	.	.	.	.	.	.	.	.	.	.	.	.	.	.
17	36875772	.	C	A	478.9	PASS	1	4121974	1	MLLT6	nonsynonymous SNV	.	.	.	.	.	.	.	.	.	.	.	.	.	.	.	.	.	.	.	.	.	.	.	.	.	.	.	.	.	.	.	.	.	.	.	.	.	.
17	37627674	rs555751910	C	T	3497.7	PASS	1	1468	1	CDK12	nonsynonymous SNV	.	.	.	.	.	.	.	0.0002	.	.	.	.	0.001	9.89e-05	0	0	0	0	0	0	0.0007	.	.	.	.	.	6.5e-05	0	0	0	0	0	0	0	0.0005	3.23e-05	0	0
17	37686925	rs562971864	C	T	1614.8	PASS	1	722	1	CDK12	nonsynonymous SNV	.	.	.	.	.	.	.	0.0002	.	.	.	0.001	.	8.47e-06	0	0	0	0	1.54e-05	0	0	.	.	.	.	.	4.09e-06	0	0	0	0	0	9.04e-06	0	0	.	.	.
17	37687355	.	T	C	300.2	PASS	1	4138527	1	CDK12	nonsynonymous SNV	.	.	.	.	.	.	.	.	.	.	.	.	.	.	.	.	.	.	.	.	.	.	.	.	.	.	.	.	.	.	.	.	.	.	.	.	.	.
17	37687436	rs767287779	C	G	416.4	PASS	1	832	1	CDK12	nonsynonymous SNV	.	.	.	.	.	.	.	.	.	.	.	.	.	.	.	.	.	.	.	.	.	.	.	.	.	.	.	.	.	.	.	.	.	.	.	.	.	.
17	37687472	.	G	A	404.8	PASS	1	4190929	1	CDK12	stopgain	.	.	.	.	.	.	.	.	.	.	.	.	.	.	.	.	.	.	.	.	.	.	.	.	.	.	.	.	.	.	.	.	.	.	.	.	.	.
17	37872145	rs142456637	C	T	464.1	PASS	2	4113191;4169012	1,1	ERBB2	nonsynonymous SNV	COSM5019397;COSM5019396	1(soft_tissue)	not provided	not_specified	RCV000120740.1	MedGen	CN169374	0.0004	.	.	.	0.002	.	0.0008	9.74e-05	0.0007	0	0	0.0012	0.0034	6.1e-05	0.0007	.	0.001	.	.	0.0008	6.54e-05	0.001	0.0008	0	0	0.0012	0.002	3.25e-05	0.0004	0.0001	0
17	37922320	.	A	C	314	PASS	1	282	1	IKZF3	nonsynonymous SNV	.	.	.	.	.	.	.	.	.	.	.	.	.	.	.	.	.	.	.	.	.	.	.	.	.	.	.	.	.	.	.	.	.	.	.	.	.	.
17	37922684	.	C	T	1249.8	PASS	1	783	1	IKZF3	nonsynonymous SNV	.	.	.	.	.	.	.	.	.	.	.	.	.	.	.	.	.	.	.	.	.	.	.	.	.	.	.	.	.	.	.	.	.	.	.	.	.	.
17	40364168	.	G	A	315.6	PASS	1	4166706	1	STAT5B	nonsynonymous SNV	.	.	.	.	.	.	.	.	.	.	.	.	.	.	.	.	.	.	.	.	.	.	.	.	.	.	.	.	.	.	.	.	.	.	.	.	.	.
17	40379567	.	G	A	699.2	PASS	1	23	1	STAT5B	nonsynonymous SNV	.	.	.	.	.	.	.	.	.	.	.	.	.	.	.	.	.	.	.	.	.	.	.	.	.	.	.	.	.	.	.	.	.	.	.	.	.	.
17	40475360	.	C	T	518	PASS	1	4198478	1	STAT3	nonsynonymous SNV	.	.	.	.	.	.	.	.	.	.	.	.	.	.	.	.	.	.	.	.	.	.	.	.	.	.	.	.	.	.	.	.	.	.	.	.	.	.
17	41243856	.	A	C	653.4	PASS	1	145	1	BRCA1	nonsynonymous SNV	.	.	.	.	.	.	.	.	.	.	.	.	.	.	.	.	.	.	.	.	.	.	.	.	.	.	.	.	.	.	.	.	.	.	.	.	.	.
17	41606065	rs117364926	G	A	552	PASS	1	4184437	1	ETV4	nonsynonymous SNV	.	.	.	.	.	.	.	0.001	.	0.0014	.	0.002	0.002	0.0011	0.0002	0.0012	0	0.0002	0.0016	0	0.0005	0.001	0.0002	0.0014	.	.	0.0009	0.0003	0.0012	0	0	0.0001	0.0015	0.0011	0.0004	0.0011	0.0001	0.0012
17	41606573	.	C	T	901.4	PASS	1	727	1	ETV4	nonsynonymous SNV	.	.	.	.	.	.	.	.	.	.	.	.	.	.	.	.	.	.	.	.	.	.	.	.	.	.	.	.	.	.	.	.	.	.	.	.	.	.
17	41606891	.	T	G	158.4	PASS	1	753	1	ETV4	nonsynonymous SNV	.	.	.	.	.	.	.	.	.	.	.	.	.	.	.	.	.	.	.	.	.	.	.	.	.	.	.	.	.	.	.	.	.	.	.	.	.	.
17	47688677	.	C	T	422.6	PASS	1	1163	1	SPOP	nonsynonymous SNV	.	.	.	.	.	.	.	.	.	.	.	.	.	.	.	.	.	.	.	.	.	.	.	.	.	.	.	.	.	.	.	.	.	.	.	.	.	.
17	47875800	rs374961973	G	A	535.2	PASS	1	1056	1	KAT7	nonsynonymous SNV	.	.	.	.	.	.	.	0.0002	.	.	.	.	0.001	0.0001	0	0	0	0	5.99e-05	0	0.0005	0.0001	.	0.0001	.	.	8.53e-05	0	0	0	0	0	4.48e-05	0.0002	0.0005	3.23e-05	0	0
17	48263206	rs147266928	T	C	369.7	PASS	1	4168738	1	COL1A1	nonsynonymous SNV	.	.	Likely benign	not_specified	RCV000424654.1	MedGen	CN169374	0.0006	.	.	.	0.003	.	0.0009	9.65e-05	0	0	0.0012	0.0015	0	0	0.0017	.	0.0026	.	.	0.0008	6.54e-05	5.96e-05	0.0002	0	0.0012	0.0014	0.0016	3.25e-05	0.001	0.0005	0
17	48270048	rs113950465	C	T	230.5	PASS	1	1424	1	COL1A1	nonsynonymous SNV	.	.	Uncertain significance|Uncertain significance	Osteogenesis_imperfecta|not_specified	RCV000029561.1|RCV000287253.2	MeSH:MedGen:Orphanet:SNOMED_CT|MedGen	D010013:C0029434:ORPHA666:78314001|CN169374	0.0004	.	0.0029	.	.	.	0.0002	9.64e-05	0.0004	0.0001	0	0.0002	0	0	0.0002	0.0002	0.0002	.	.	0.0002	6.53e-05	0.0004	0	5.8e-05	0	0.0004	0.0002	3.25e-05	0.0003	0	0.0012
17	55752446	rs145489286	G	A	362.1	PASS	1	17	1	MSI2	nonsynonymous SNV	.	.	.	.	.	.	.	0.0002	.	.	.	0.001	.	0.0007	0.0004	0.0003	0	0.0002	0.0012	0	0	0.0012	0.0007	0.0014	.	.	0.0007	0.0001	0.0003	0	0	0.0001	0.0014	0	0	0.0009	0.0006	0.0012
17	56770161	rs377297129	T	G	479	PASS	1	4176046	1	RAD51C	stoploss
17	57079058	.	C	T	225.1	PASS	1	5	1	TRIM37	nonsynonymous SNV	.	.	.	.	.	.	.	.	.	.	.	.	.	.	.	.	.	.	.	.	.	.	.	.	.	.	.	.	.	.	.	.	.	.	.	.	.	.
17	57093101	.	C	T	360.2	PASS	1	4144366	1	TRIM37	nonsynonymous SNV	.	.	.	.	.	.	.	.	.	.	.	.	.	.	.	.	.	.	.	.	.	.	.	.	.	.	.	.	.	.	.	.	.	.	.	.	.	.
17	57106011	rs200239638	C	T	319.9	PASS	1	115	1	TRIM37	nonsynonymous SNV	.	.	.	.	.	.	.	0.0002	.	0.0014	.	.	.	0.0001	9.73e-05	0.0002	0	0	0.0002	0	0	.	.	.	.	.	0.0001	6.54e-05	0.0002	0	0	0	0.0002	0	0	6.46e-05	0	0
17	57109451	.	C	T	421.4	PASS	1	1424	1	TRIM37	nonsynonymous SNV	.	.	.	.	.	.	.	.	.	.	.	.	.	.	.	.	.	.	.	.	.	.	.	.	.	.	.	.	.	.	.	.	.	.	.	.	.	.
17	57759018	.	A	G	530.5	PASS	1	4181460	1	CLTC	nonsynonymous SNV	.	.	.	.	.	.	.	.	.	.	.	.	.	.	.	.	.	.	.	.	.	.	.	.	.	.	.	.	.	.	.	.	.	.	.	.	.	.
17	57763076	.	G	T	821.3	PASS	1	278	1	CLTC	nonsynonymous SNV	.	.	.	.	.	.	.	.	.	.	.	.	.	.	.	.	.	.	.	.	.	.	.	.	.	.	.	.	.	.	.	.	.	.	.	.	.	.
17	58725415	.	A	G	895.6	PASS	1	308	1	PPM1D	nonsynonymous SNV	.	.	.	.	.	.	.	.	.	.	.	.	.	.	.	.	.	.	.	.	.	.	.	.	.	.	.	.	.	.	.	.	.	.	.	.	.	.
17	59761413	rs878855150	C	CTTTG	212.1	PASS	1	4177601	1	BRIP1	frameshift insertion	.	.	Likely pathogenic|Likely pathogenic	Familial_cancer_of_breast|Fanconi_anemia\x2c_complementation_group_J	RCV000233395.1|RCV000233395.1	MedGen:OMIM:Orphanet:SNOMED_CT|MedGen:OMIM	C0346153:114480:ORPHA227535:254843006|C1836860:609054	.	.	.	.	.	.	.	.	.	.	.	.	.	.	.	.	.	.	.	.	.	.	.	.	.	.	.	.	.	.	.
17	59885856	rs28997570	T	C	1317.9	PASS	2	351;4178518	1,1	BRIP1	nonsynonymous SNV	.	.	Benign|Likely benign|Likely benign|Likely benign|Likely benign|Likely benign	Hereditary_cancer-predisposing_syndrome|not_specified|Familial_cancer_of_breast|Fanconi_anemia\x2c_complementation_group_J|Neoplasm_of_ovary|Fanconi_anemia\x2c_complementation_group_J	RCV000116167.6|RCV000120408.5|RCV000123367.6|RCV000123367.6|RCV000410013.1|RCV000412293.1	MedGen:SNOMED_CT|MedGen|MedGen:OMIM:Orphanet:SNOMED_CT|MedGen:OMIM|Gene:MedGen:OMIM:SNOMED_CT|MedGen:OMIM	C0027672:699346009|CN169374|C0346153:114480:ORPHA227535:254843006|C1836860:609054|6765:C0919267:167000:123843001|C1836860:609054	0.0004	.	.	.	0.002	.	0.0011	0.0003	0.0003	0	0.0012	0.0017	0.0011	0.0004	0.0013	0.0007	0.0016	.	.	0.0011	0.0005	0.0004	0	0	0.001	0.0018	0.0011	0.0004	0.0008	0.0003	0
17	62500193	.	G	C	1089.9	PASS	1	760	1	DDX5	nonsynonymous SNV	.	.	.	.	.	.	.	.	.	.	.	.	.	.	.	.	.	.	.	.	.	.	.	.	.	.	.	.	.	.	.	.	.	.	.	.	.	.
17	63010416	rs144334275	T	A	445.8	PASS	2	4158268;4162611	1,1	GNA13	nonsynonymous SNV	.	.	.	.	.	.	.	0.0004	.	.	.	0.002	.	0.0005	9.61e-05	0	0	0.0011	0.0008	0.0011	6.06e-05	0.0002	.	0.0003	.	.	0.0005	0.0001	2.98e-05	0	0	0.0016	0.0007	0.0004	3.25e-05	0.0004	0.0002	0
17	63010848	rs1062597	C	G	774.3	PASS	7	1167;1221;1294;565;661;754;4186812	1,1,1,1,1,1,1	GNA13	nonsynonymous SNV	.	.	.	.	.	.	.	0.0008	.	0.0014	.	0.003	.	0.0016	0.0004	0.0009	0	0	0.0027	0.0011	0.0002	0.0025	0.0007	0.0034	.	.	0.0017	0.0004	0.001	0.0022	0	0.0002	0.0029	0.0022	0.0005	0.0016	0.0003	0
17	63049619	.	C	A	328.3	PASS	1	4135278	1	GNA13	splice_donor
17	63049685	rs201626569	T	C	1852.3	PASS	1	381	1	GNA13	nonsynonymous SNV	.	.	.	.	.	.	.	0.0004	.	.	.	0.001	0.001	0.0002	0	0.0003	0.0002	0	0.0002	0	0.0005	0.0002	.	0.0003	.	.	0.0003	0	0.0002	0	0.0003	0	0.0003	0.0005	0.0005	0.0002	0.0002	0
17	63526198	rs140344858	C	T	459.4	PASS	1	4133863	1	AXIN2	nonsynonymous SNV	COSM983020	1(endometrium)	Uncertain significance|Likely benign	not_specified|Oligodontia-colorectal_cancer_syndrome	RCV000115877.4|RCV000226193.2	MedGen|MedGen:OMIM:Orphanet	CN169374|C1837750:608615:ORPHA300576	0.0012	0.0045	.	.	.	.	0.0003	0.0039	0	0	0	1.5e-05	0	0	0.0012	0.0032	0.0001	.	.	0.0003	0.0037	0.0001	0	0	0	8.97e-06	0	0	0.0009	0.003	0
17	63532528	rs138287857	G	A	249.8	PASS	1	4161696	1	AXIN2	nonsynonymous SNV	COSM3665212	1(oesophagus)	Uncertain significance|Likely benign	not_specified|Oligodontia-colorectal_cancer_syndrome	RCV000115873.5|RCV000234519.3	MedGen|MedGen:OMIM:Orphanet	CN169374|C1837750:608615:ORPHA300576	0.0004	.	.	.	0.002	.	0.0019	0.0003	0.0004	0	0.0015	0.003	0.0035	0.0004	0.0014	0.0007	0.0017	.	.	0.0016	0.0002	0.0003	0.0089	0	0.0009	0.0024	0.0017	0.0004	0.0012	0.0002	0
17	63534353	rs139871607	T	C	229.8	PASS	1	4198478	1	AXIN2	nonsynonymous SNV	.	.	Uncertain significance|Likely benign|Uncertain significance|Uncertain significance	not_specified|Oligodontia-colorectal_cancer_syndrome|Colorectal_cancer|Oligodontia	RCV000115866.5|RCV000227795.3|RCV000417356.1|RCV000417356.1	MedGen|MedGen:OMIM:Orphanet|MedGen|Human_Phenotype_Ontology:MedGen	CN169374|C1837750:608615:ORPHA300576|CN221574|HP:0000677:CN000637	0.0006	.	.	.	0.003	.	0.0009	0.0004	0.0002	0	0.0002	0.0016	0.0011	0	0.0016	0.0002	0.0023	.	.	0.0008	0.0003	0.0002	0	0	0.0003	0.0015	0.0011	0	0.0007	0.0001	0
17	63554116	rs201531372	G	A	1391.8	PASS	1	366	1	AXIN2	nonsynonymous SNV	.	.	Uncertain significance|other	not_specified|Oligodontia-colorectal_cancer_syndrome	RCV000115879.5|RCV000228466.3	MedGen|MedGen:OMIM:Orphanet	CN169374|C1837750:608615:ORPHA300576	0.0002	.	.	.	.	0.001	0.0002	0	0.0003	0	0	0.0002	0	0.0008	0.0002	.	0.0002	.	.	0.0003	0	0.0003	0.0001	0	0	0.0002	0.0002	0.0008	6.46e-05	0	0
17	66511668	.	C	T	720.7	PASS	1	4101626	1	PRKAR1A	nonsynonymous SNV	.	.	.	.	.	.	.	.	.	.	.	.	.	.	.	.	.	.	.	.	.	.	.	.	.	.	.	.	.	.	.	.	.	.	.	.	.	.
17	66518940	rs200069356	G	A	630.7	PASS	2	142;815	1,1	PRKAR1A	nonsynonymous SNV	.	.	Likely benign|Likely benign|Likely benign	Carney_complex\x2c_type_1|Carney_complex|Acrodysostosis	RCV000233943.2|RCV000327381.1|RCV000384218.1	MedGen:OMIM|MedGen:Orphanet|MedGen:Orphanet:SNOMED_CT	C2607929:160980|C0406810:ORPHA1359|C0220659:ORPHA950:66758006	0.0004	.	.	.	.	0.002	0.0004	0	0.0011	0	0	0.0003	0	0.0008	.	.	.	.	.	0.0004	0	0.001	0	5.8e-05	0	0.0003	0.0011	0.0007	0.0003	0	0.0012
17	73775231	.	G	T	79.8	PASS	1	4159421	1	H3F3B	nonsynonymous SNV	.	.	.	.	.	.	.	.	.	.	.	.	.	.	.	.	.	.	.	.	.	.	.	.	.	.	.	.	.	.	.	.	.	.	.	.	.	.
17	74470206	.	C	A	389.4	PASS	1	122	1	RHBDF2	nonsynonymous SNV	.	.	.	.	.	.	.	.	.	.	.	.	.	.	.	.	.	.	.	.	.	.	.	.	.	.	.	.	.	.	.	.	.	.	.	.	.	.
17	74473317	.	G	C	336.7	PASS	1	832	1	RHBDF2	nonsynonymous SNV	.	.	.	.	.	.	.	.	.	.	.	.	.	.	.	.	.	.	.	.	.	.	.	.	.	.	.	.	.	.	.	.	.	.	.	.	.	.
17	74473329	rs140433374	C	T	178.9	PASS	1	395	1	RHBDF2	nonsynonymous SNV	.	.	.	.	.	.	.	0.0002	.	0.0014	.	.	.	0.0008	0.0002	0.0008	0	0.0015	0.001	0	0.0011	0.0007	.	0.001	.	.	0.0008	0.0002	0.0008	0.0001	0	0.0012	0.001	0.0008	0.0008	0.0005	0	0.0012
17	74732530	.	G	A	249.4	PASS	1	382	1	SRSF2	nonsynonymous SNV	.	.	.	.	.	.	.	.	.	.	.	.	.	.	.	.	.	.	.	.	.	.	.	.	.	.	.	.	.	.	.	.	.	.	.	.	.	.
17	76989693	rs544902800	C	G	319.3	PASS	1	4166940	1	CANT1	nonsynonymous SNV	.	.	.	.	.	.	.	0.0002	.	.	.	0.001	.	8.24e-06	0	0	0	0	1.5e-05	0	0	.	.	.	.	.	4.06e-06	0	0	0	0	0	8.95e-06	0	0	.	.	.
17	76989775	rs145516713	C	T	1010.5	PASS	5	083;1309;152;330;383	1,1,1,1,1	CANT1	nonsynonymous SNV	.	.	.	.	.	.	.	0.0004	.	0.0014	.	0.001	.	0.0004	0.0002	0.0015	0	0	0.0005	0	0	0.0008	0.0005	0.001	.	.	0.0006	6.54e-05	0.002	0.0001	0	4.49e-05	0.0006	0.0007	0	0.0002	0.0003	0.0012
17	78311449	rs368850066	C	T	486.1	PASS	1	4142267	1	RNF213	nonsynonymous SNV	.	.	.	.	.	.	.	0.0002	.	.	.	0.001	.	0.0002	0	0	0	0	0.0004	0	0	0.0004	.	0.0006	.	.	0.0001	0	0	0	0	0	0.0002	0	4.39e-05	0.0002	0.0001	0
17	78311637	.	C	T	144.6	PASS	1	4137230	1	RNF213	nonsynonymous SNV	.	.	.	.	.	.	.	.	.	.	.	.	.	.	.	.	.	.	.	.	.	.	.	.	.	.	.	.	.	.	.	.	.	.	.	.	.	.
17	78313946	.	G	T	398.7	PASS	1	4109808	1	RNF213	nonsynonymous SNV	.	.	.	.	.	.	.	.	.	.	.	.	.	.	.	.	.	.	.	.	.	.	.	.	.	.	.	.	.	.	.	.	.	.	.	.	.	.
17	78313951	rs181142554	G	A	2302.3	PASS	1	591	1	RNF213	nonsynonymous SNV	.	.	.	.	.	.	.	0.0002	.	0.0014	.	.	.	3.34e-05	0	8.78e-05	0	0	4.54e-05	0	0	.	.	.	.	.	4.07e-05	0	8.93e-05	0	0	0	4.48e-05	0.0002	3.25e-05	.	.	.
17	78319718	rs202143169	G	A	467.3	PASS	1	284	1	RNF213	nonsynonymous SNV	COSM4580222;COSM4580221	1(bone)	.	.	.	.	.	0.0002	.	.	.	0.001	.	0.0003	0	0.0009	0	0.0002	0.0002	0.0011	0.0004	.	.	.	.	.	0.0003	0	0.0007	0	0	0.0002	0.0002	0.0005	0.0004	9.68e-05	0.0002	0
17	78328364	rs200217989	C	T	325.3	PASS	1	809	1	RNF213	nonsynonymous SNV	.	.	.	.	.	.	.	0.0002	.	.	.	0.001	.	0.0001	0	8.65e-05	0	0	0.0002	0	0	.	.	.	.	.	7.73e-05	0	0.0001	0	0	0	0.0001	0.0002	0	3.23e-05	0	0.0012
17	78348466	.	ATGATGCAGGGTGATGGACCAC	A	214.3	PASS	1	4164330	1	RNF213	stoploss
17	78355462	rs141301945	C	T	781.2	PASS	3	284;753;753	1,1,1	RNF213	nonsynonymous SNV	.	.	.	.	.	.	.	0.0004	.	.	.	0.002	.	0.0006	0.0003	0.0006	0	0.0002	0.001	0	0	0.001	0.0002	0.0014	.	0.0082	0.0007	0.0002	0.0006	0.0012	0	8.98e-05	0.0011	0.0004	0	0.0005	0.0006	0
17	78363852	.	T	C	646.2	PASS	1	4128355	1	RNF213	nonsynonymous SNV	.	.	.	.	.	.	.	.	.	.	.	.	.	.	.	.	.	.	.	.	.	.	.	.	.	.	.	.	.	.	.	.	.	.	.	.	.	.
17	79967904	rs556931297	G	GC	451	PASS	3	4105105;4175941;4194891	1,1,1	ASPSCR1	frameshift insertion
18	22805073	rs114102095	G	C	545	PASS	1	4148261	1	ZNF521	nonsynonymous SNV	.	.	.	.	.	.	.	0.0004	.	0.0014	.	0.001	.	0.0005	0.0002	0.0004	0	0	0.0008	0.0022	0	0.0009	.	0.0014	.	.	0.0006	0.0002	0.0004	0.0016	0	0	0.0009	0.0007	0	0.0004	0.0001	0
18	22805282	rs1048517256	T	G	145.9	PASS	1	1484	1	ZNF521	nonsynonymous SNV	.	.	.	.	.	.	.	.	.	.	.	.	.	.	.	.	.	.	.	.	.	.	.	.	.	.	.	.	.	.	.	.	.	.	.	.	.	.
18	22806533	rs138606013	T	C	828.6	PASS	1	832	1	ZNF521	nonsynonymous SNV	.	.	.	.	.	.	.	0.0004	.	.	.	0.001	0.001	0.0001	0	0	0	0.0006	0.0001	0	6.06e-05	0.0001	.	0.0001	.	0.016	0.0001	0	5.96e-05	0.0008	0	0.0003	0.0001	0	3.25e-05	.	.	.
18	22806966	rs150250688	C	T	776.5	PASS	3	186;1427;4161288	1,1,1	ZNF521	nonsynonymous SNV	COSM5904471	1(skin)	.	.	.	.	.	0.0002	.	.	.	0.001	.	0.0009	0.0006	0.0008	0	0.0002	0.0014	0.0011	0	0.001	0.0009	0.001	.	.	0.0009	0.0006	0.0005	0.0004	5.81e-05	0.0003	0.0016	0.0005	3.25e-05	0.0005	0.0001	0
18	22806981	rs114155230	C	T	3106.9	PASS	3	011;149;4128355	1,1,1	ZNF521	nonsynonymous SNV	.	.	.	.	.	.	.	0.0008	.	0.0014	.	0.003	.	0.0019	0.0005	0.0015	0	0.0006	0.0027	0.0011	0.0019	0.0027	0.0011	0.0035	.	.	0.002	0.0005	0.0013	0.0016	0	0.0004	0.0032	0.0026	0.0018	0.0019	0.0003	0.0024
18	23615004	rs147146752	C	A	984.5	PASS	5	022;165;170;188;291	1,1,1,1,1	SS18	nonsynonymous SNV	.	.	.	.	.	.	.	0.0006	0.0008	.	.	0.001	0.001	0.0015	0.0003	0.0006	0.0001	0.0002	0.0023	0.0011	0.0008	0.0016	0.0002	0.0023	.	.	0.0016	0.0002	0.0006	0.0057	5.81e-05	0.0003	0.0025	0.0007	0.0008	0.0011	0.0003	0.0012
18	30349869	rs142480775	G	C	115.2	PASS	1	4110996	1	KLHL14	nonsynonymous SNV	.	.	.	.	.	.	.	0.0002	.	0.0014	.	.	.	0.0002	0	0.0003	0	0.0003	0.0003	0.0011	0	0.0003	.	0.0005	.	.	0.0002	0	0.0001	0	0	0.0002	0.0004	0.0005	3.25e-05	9.69e-05	0	0
18	30350575	.	C	A	473.9	PASS	1	885	1	KLHL14	nonsynonymous SNV
18	42530102	rs1316407204	A	G	1557.3	PASS	1	820	1	SETBP1	nonsynonymous SNV	.	.	.	.	.	.	.	.	.	.	.	.	.	.	.	.	.	.	.	.	.	.	.	.	.	.	.	.	.	.	.	.	.	.	.	.	.	.
18	42530797	rs548105094	C	T	1409.9	PASS	1	669	1	SETBP1	nonsynonymous SNV	COSM2812054	1(stomach)	.	.	.	.	.	0.0002	.	0.0014	.	.	.	1.65e-05	0	0	0	0	3e-05	0	0	.	.	.	.	.	2.44e-05	0	0	0	0	0	4.48e-05	0	3.25e-05	6.46e-05	0	0
18	42530798	rs563237293	G	A	860.6	PASS	3	189;325;1164	1,1,1	SETBP1	nonsynonymous SNV	.	.	.	.	.	.	.	0.0004	.	0.0014	.	.	0.001	4.12e-05	0	0.0002	0	0	3e-05	0	6.06e-05	.	.	.	.	.	8.13e-05	6.54e-05	0.0003	0	0	0	6.28e-05	0.0002	3.25e-05	9.69e-05	0.0002	0
18	42533267	rs149638556	G	A	486	PASS	3	005;764;179	1,1,1	SETBP1	nonsynonymous SNV	COSM5989938	1(haematopoietic_and_lymphoid_tissue)	.	.	.	.	.	0.0004	.	0.0029	.	.	.	0.0004	0.0003	0.0025	0	0	0.0003	0.0011	0	0.0003	0.0002	0.0003	.	.	0.0005	0.0001	0.0019	0	0	0	0.0005	0.0017	3.26e-05	0.0005	0.0005	0.006
18	45374888	.	C	T	312.3	PASS	1	1165	1	SMAD2	nonsynonymous SNV	.	.	.	.	.	.	.	.	.	.	.	.	.	.	.	.	.	.	.	.	.	.	.	.	.	.	.	.	.	.	.	.	.	.	.	.	.	.
18	50589797	.	G	A	1809.9	PASS	1	874	1	DCC	nonsynonymous SNV	.	.	.	.	.	.	.	.	.	.	.	.	.	.	.	.	.	.	.	.	.	.	.	.	.	.	.	.	.	.	.	.	.	.	.	.	.	.
18	50592476	.	G	A	471.8	PASS	1	4194218	1	DCC	nonsynonymous SNV	.	.	.	.	.	.	.	.	.	.	.	.	.	.	.	.	.	.	.	.	.	.	.	.	.	.	.	.	.	.	.	.	.	.	.	.	.	.
18	50592531	rs144623089	A	G	1233.1	PASS	3	139;4148261;4166151	1,1,1	DCC	nonsynonymous SNV	.	.	.	.	.	.	.	0.0014	0.0008	.	.	0.003	0.0031	0.0029	0.0003	0.0007	0	0.0015	0.0043	0.0022	0.0029	0.0032	0.0007	0.0045	.	.	0.0029	0.0006	0.0012	0	0.0001	0.0025	0.0045	0.0024	0.0029	0.0027	0.0009	0
18	50832030	rs369809232	C	T	432.2	PASS	1	4121974	1	DCC	nonsynonymous SNV	COSM4072539;COSM4072540	1(stomach);5(prostate)	.	.	.	.	.	0.0004	.	0.0014	0.001	.	.	5.77e-05	0	8.66e-05	0.0001	0	1.5e-05	0	0.0002	0.0001	.	0.0001	.	.	3.25e-05	0	0	0	5.8e-05	0	1.79e-05	0	0.0002	3.23e-05	0	0
18	54358969	.	T	C	642	PASS	1	330	1	WDR7	nonsynonymous SNV	.	.	.	.	.	.	.	.	.	.	.	.	.	.	.	.	.	.	.	.	.	.	.	.	.	.	.	.	.	.	.	.	.	.	.	.	.	.
18	54423856	rs138399196	G	T	771	PASS	2	1059;4110498	1,1	WDR7	nonsynonymous SNV	.	.	.	.	.	.	.	0.0002	.	.	.	0.001	.	0.0013	9.84e-05	0	0	0.0048	0.0019	0.0011	0	0.0012	0.0002	0.0016	.	.	0.0014	0.0003	6e-05	0.0001	0	0.0044	0.0021	0.0007	0	0.0043	0.0002	0
18	54423971	rs139102456	C	T	981.8	PASS	5	182;794;875;4100049;4118156	1,1,1,1,1	WDR7	nonsynonymous SNV	.	.	.	.	.	.	.	0.0004	.	.	.	0.002	.	0.0006	0.0003	0.0008	0	0.0002	0.0009	0	0.0001	0.0005	.	0.0008	.	.	0.0006	0.0002	0.001	0	0	4.49e-05	0.0009	0	0.0002	0.0005	0.0003	0
18	54605806	.	C	A	585.2	PASS	1	585	1	WDR7	nonsynonymous SNV	.	.	.	.	.	.	.	.	.	.	.	.	.	.	.	.	.	.	.	.	.	.	.	.	.	.	.	.	.	.	.	.	.	.	.	.	.	.
18	54688000	rs574508992	A	G	477	PASS	1	145	1	WDR7	nonsynonymous SNV	.	.	.	.	.	.	.	0.0004	.	.	.	.	0.002	0.0003	0	0	0	0	0	0.0022	0.0019	.	.	.	.	.	0.0003	0	2.98e-05	0	0	0	8.96e-06	0	0.0025	3.23e-05	0	0.0012
18	56184289	rs56067275	G	A	818.2	PASS	1	580	1	ALPK2	nonsynonymous SNV	.	.	.	.	.	.	.	0.0002	.	.	.	0.001	.	9.89e-05	0.0002	0	0.0001	0	0.0001	0	6.06e-05	.	.	.	.	.	0.0001	0.0001	0.0001	0	5.8e-05	0	0.0002	0	3.25e-05	0.0002	0.0002	0
18	56184297	rs55647142	C	T	471.9	PASS	1	54	1	ALPK2	nonsynonymous SNV	COSM231742;COSM231743	1(skin)	.	.	.	.	.	0.0002	.	0.0014	.	.	.	0.0003	0.0004	0.0003	0	0	0.0005	0	0	0.0007	0.0007	0.0007	.	.	0.0004	0.0003	0.0005	0.0001	0	0	0.0007	0.0002	0	0.0006	0.0005	0
18	56205096	rs146152799	A	G	464.9	PASS	1	4124432	1	ALPK2	nonsynonymous SNV	.	.	.	.	.	.	.	0.0002	.	.	.	0.001	.	0.0005	0.0002	8.64e-05	0	0	0.0008	0.0011	0.0002	0.0013	0.0005	0.0017	.	.	0.0005	0.0002	0.0002	0.0001	0	0	0.0009	0.0004	9.75e-05	0.0006	0.0001	0
18	56205373	rs561573547	T	TG	211.4	PASS	2	002;244	1,1	ALPK2	frameshift insertion	.	.	.	.	.	.	.	0.0006	.	0.0014	.	0.002	.	0.0018	0.0005	0.0007	0	0.0005	0.003	0.0022	0.0005	0.0023	0.0002	0.0034	.	.	0.0019	0.0003	0.0011	0.0058	0	0.0007	0.0028	0.0017	0.0007	0.0018	0.0007	0.0012
18	56247152	rs138300448	C	A	201.4	PASS	1	4174742	1	ALPK2	nonsynonymous SNV	.	.	.	.	.	.	.	0.0002	.	.	.	0.001	.	0.0005	9.61e-05	0	0	0	0.0009	0	0	0.001	.	0.0015	.	0.0082	0.0006	0.0001	0.0003	0	0	0	0.0012	0.0004	0	0.0006	0.0008	0
18	56414962	.	C	G	274.9	PASS	1	4183136	1	MALT1	stopgain	.	.	.	.	.	.	.	.	.	.	.	.	.	.	.	.	.	.	.	.	.	.	.	.	.	.	.	.	.	.	.	.	.	.	.	.	.	.
18	61022498	rs1449404392	A	G	325.5	PASS	1	4133263	1	KDSR	nonsynonymous SNV	.	.	.	.	.	.	.	.	.	.	.	.	.	.	.	.	.	.	.	.	.	.	.	.	.	.	.	.	.	.	.	.	.	.	.	3.23e-05	0	0
19	1226555	rs200078204	C	T	268.6	PASS	1	4137230	1	STK11	nonsynonymous SNV	.	.	Likely benign|Likely benign|other	Hereditary_cancer-predisposing_syndrome|Peutz-Jeghers_syndrome|not_specified	RCV000115596.7|RCV000200450.5|RCV000213035.5	MedGen:SNOMED_CT|MeSH:MedGen:OMIM:Orphanet:SNOMED_CT|MedGen	C0027672:699346009|D010580:C0031269:175200:ORPHA2869:54411001|CN169374	0.0004	.	.	.	0.002	.	0.0009	0	0.0002	0	0	0.0016	0	0.0002	0.0004	.	0.0006	.	.	0.0004	8.42e-05	0.0002	0	0	0	0.0008	0.0006	0.0001	0.0005	0.0003	0
19	1615732	.	GT	G	462.5	PASS	1	1446	1	TCF3	frameshift deletion
19	1615775	rs149277795	C	T	316.8	PASS	1	4122063	1	TCF3	nonsynonymous SNV	.	.	.	.	.	.	.	0.0004	.	.	.	.	0.002	0.0001	9.74e-05	8.68e-05	0.0001	0	0.0002	0	8.6e-05	.	.	.	.	.	0.0001	0	9.27e-05	0.0005	0.0001	0	0.0002	0	7.46e-05	6.48e-05	0.0001	0
19	1615785	rs201250905	C	T	223.7	PASS	1	1339	1	TCF3	nonsynonymous SNV	.	.	.	.	.	.	.	0.0004	0.0015	.	.	.	.	2.67e-05	0.0002	0	0	0	1.56e-05	0	0	.	.	.	.	.	4.04e-05	0.0001	0	0.0001	0	0	5.94e-05	0	0	0.0004	0	0
19	1625601	rs554419240	C	T	142	PASS	1	1426	1	TCF3	nonsynonymous SNV	.	.	.	.	.	.	.	0.0006	.	.	.	0.003	.	0.0002	0	0.0011	0	0	0.0001	0.0021	9.41e-05	.	.	.	.	.	0.0002	0	0.0007	0	0	0	0.0002	0.0013	0.0001	9.69e-05	0.0001	0.0012
19	1650226	rs147133056	C	A	898.4	PASS	1	4176046	1	TCF3	nonsynonymous SNV	COSM1391233;COSM1391234	1(large_intestine)	.	.	.	.	.	0.0002	.	.	.	0.001	.	0.0017	0.0003	0	0	0.0045	0.0036	0	0	0.0024	0.0005	0.0034	.	.	0.0011	0.0003	0.0004	0.0007	0	0.0007	0.0021	0.0007	0	0.0007	0.0003	0.0012
19	3119235	rs529942770	G	A	194.8	PASS	1	83	1	GNA11	nonsynonymous SNV	.	.	.	.	.	.	.	0.0002	.	.	.	.	0.001	1.65e-05	0	0	0	0	1.5e-05	0	6.06e-05	.	.	.	.	.	1.63e-05	0	0	0	0	0	2.69e-05	0	3.25e-05	.	.	.
19	4090612	rs117945277	G	A	326.3	PASS	1	4198478	1	MAP2K2	nonsynonymous SNV	.	.	Uncertain significance	not_specified	RCV000269273.1	MedGen	CN169374	0.0002	.	.	.	0.001	.	0.0001	0	0	0	0	0.0002	0	0	.	.	.	0.011	.	7.26e-05	0	0	0	0	0	0.0002	0.0003	0	.	.	.
19	4365515	rs868490265	G	A	181.4	PASS	1	1185	1	SH3GL1	nonsynonymous SNV	.	.	.	.	.	.	.	.	.	.	.	.	.	.	.	.	.	.	.	.	.	.	.	.	.	.	.	.	.	.	.	.	.	.	.	.	.	.
19	6222523	rs1286763401	T	C	137	PASS	1	4130194	1	MLLT1	nonsynonymous SNV	.	.	.	.	.	.	.	.	.	.	.	.	.	.	.	.	.	.	.	.	.	.	.	.	.	.	0	0	0	0	0	0	0	0	0	.	.	.
19	6222610	rs143656133	C	T	273.8	PASS	2	1164;4147968	1,1	MLLT1	nonsynonymous SNV	.	.	.	.	.	.	.	0.0016	.	0.0043	.	0.003	0.002	0.0011	0	0.0024	0	0	0.001	0.0048	0.0024	0.0004	.	0.0006	.	.	0.0012	6.62e-05	0.0022	0	0	7.18e-05	0.001	0.0026	0.0025	0.0005	0	0.0012
19	8993450	rs796290489	A	C	121.7	PASS	1	1267	1	MUC16	nonsynonymous SNV	COSM5763744	1(large_intestine)	.	.	.	.	.	.	.	.	.	.	.	.	.	.	.	.	.	.	.	.	.	.	.	.	.	.	.	.	.	.	.	.	.	0.0939	0.175	0.0873
19	8997119	rs145435147	T	C	2115.4	PASS	2	023;361	1,1	MUC16	nonsynonymous SNV	.	.	.	.	.	.	.	0.0004	.	0.0014	.	0.001	.	0.0003	0.0001	0.0004	0	0	0.0004	0.0011	0	0.0004	.	0.0006	.	.	0.0002	0	0.0003	0	0	0	0.0004	0.0004	0	0.0001	0.0001	0
19	9038416	.	C	A	1360	PASS	1	110	1	MUC16	splice_acceptor
19	9057564	.	CT	C	907.9	PASS	1	266	1	MUC16	frameshift deletion	COSM5747990;COSM5747989	1(pancreas)	.	.	.	.	.	.	.	.	.	.	.	.	.	.	.	.	.	.	.	.	.	.	.	.	.	.	.	.	.	.	.	.	.	.	.	.
19	9057667	.	G	A	5806.7	PASS	1	15	1	MUC16	stopgain	COSM6086988;COSM6086987	1(lung)	.	.	.	.	.	.	.	.	.	.	.	.	.	.	.	.	.	.	.	.	.	.	.	.	.	.	.	.	.	.	.	.	.	.	.	.
19	9064630	.	TG	T	2264.8	PASS	2	885;824	1,1	MUC16	frameshift deletion
19	9067923	.	G	GT	104.7	PASS	1	17	1	MUC16	frameshift insertion
19	9087935	.	TTG	T	981.3	PASS	1	114	1	MUC16	frameshift deletion
19	10247750	rs1013461054	A	T	307.6	PASS	1	4186812	1	DNMT1	splice_donor
19	10305545	rs1216341078	G	A	473	PASS	1	544	1	DNMT1	nonsynonymous SNV	COSM5854544;COSM5854543	1(NS)	.	.	.	.	.	.	.	.	.	.	.	.	.	.	.	.	.	.	.	.	.	.	.	.	0	0	0	0	0	0	0	0	0	.	.	.
19	10335403	rs3745268	C	T	242.4	PASS	1	4149246	1	S1PR2	nonsynonymous SNV	.	.	.	.	.	.	.	0.0004	.	.	0.002	.	.	0.0002	0	0	0.0027	0	7.52e-05	0	0	.	.	.	.	.	0.0002	0	2.98e-05	0	0.0028	4.48e-05	5.37e-05	0	0	0.0002	0	0
19	10599900	.	A	G	186.1	PASS	1	4117030	1	KEAP1	nonsynonymous SNV	.	.	.	.	.	.	.	.	.	.	.	.	.	.	.	.	.	.	.	.	.	.	.	.	.	.	.	.	.	.	.	.	.	.	.	.	.	.
19	10600042	.	C	A	110.2	PASS	1	727	1	KEAP1	nonsynonymous SNV	.	.	.	.	.	.	.	.	.	.	.	.	.	.	.	.	.	.	.	.	.	.	.	.	.	.	.	.	.	.	.	.	.	.	.	.	.	.
19	10602344	rs147613351	G	A	77.1	PASS	1	1098	1	KEAP1	nonsynonymous SNV	.	.	.	.	.	.	.	0.0002	.	.	.	0.001	.	0.0004	0.0001	0.0006	0	0	0.0006	0	0	0.0004	.	0.0006	.	.	0.0003	7.04e-05	0.0003	0.0022	0	0	0.0004	0.0002	0	0.0002	0.0001	0
19	10610439	rs202181679	C	T	499.4	PASS	3	1053;598;4110996	1,1,1	KEAP1	nonsynonymous SNV	COSM2812647	1(large_intestine)	.	.	.	.	.	0.0002	.	0.0014	.	.	.	0.0002	0	0.0002	0	0.0002	0.0003	0	0	0.0001	.	0.0001	.	.	0.0003	0	8.93e-05	0.0038	5.8e-05	0.0003	0.0001	0.0011	3.25e-05	9.7e-05	0	0
19	10935776	.	A	AC	234.6	PASS	1	1	1	DNM2	frameshift insertion
19	11152102	rs879796805	C	A	357.6	PASS	1	158	1	SMARCA4	nonsynonymous SNV	.	.	.	.	.	.	.	.	.	.	.	.	.	.	.	.	.	.	.	.	.	.	.	.	.	.	.	.	.	.	.	.	.	.	.	.	.	.
19	12903216	.	A	G	34.1	PASS	1	4159421	1	JUNB	nonsynonymous SNV	.	.	.	.	.	.	.	.	.	.	.	.	.	.	.	.	.	.	.	.	.	.	.	.	.	.	.	.	.	.	.	.	.	.	.	.	.	.
19	13054760	rs201689726	G	A	250.8	PASS	1	4199848	1	CALR	nonsynonymous SNV
19	14204604	.	C	T	511.7	PASS	1	4101815	1	PRKACA	nonsynonymous SNV	.	.	.	.	.	.	.	.	.	.	.	.	.	.	.	.	.	.	.	.	.	.	.	.	.	.	.	.	.	.	.	.	.	.	.	.	.	.
19	14626895	rs143320658	G	A	197.9	PASS	1	4189200	1	DNAJB1	nonsynonymous SNV	COSM330692	1(lung)	.	.	.	.	.	0.0006	.	0.0029	.	0.001	.	0.0003	9.62e-05	0.0003	0	0	0.0005	0	0	0.0005	0.0002	0.0006	.	.	0.0003	0	0.0004	0	0	0	0.0006	0.0002	0	0.0002	0.0002	0
19	14627495	.	G	C	745.3	PASS	1	770	1	DNAJB1	nonsynonymous SNV	.	.	.	.	.	.	.	.	.	.	.	.	.	.	.	.	.	.	.	.	.	.	.	.	.	.	.	.	.	.	.	.	.	.	.	.	.	.
19	14627718	.	G	A	1545.3	PASS	1	709	1	DNAJB1	stopgain	.	.	.	.	.	.	.	.	.	.	.	.	.	.	.	.	.	.	.	.	.	.	.	.	.	.	.	.	.	.	.	.	.	.	.	.	.	.
19	14629019	rs199815171	A	G	201.9	PASS	1	505	1	DNAJB1	nonsynonymous SNV	.	.	.	.	.	.	.	0.0002	.	0.0014	.	.	.	2.94e-05	0	0.0003	0	0	0	0	0	.	.	.	.	.	1.68e-05	0	0.0001	0	0	0	0	0	0	.	.	.
19	17945708	rs146837396	C	G	320.2	PASS	4	1167;1507;326;523	1,1,1,1	JAK3	nonsynonymous SNV	COSM5946070	1(NS)	not provided|Uncertain significance	not_specified|Severe_Combined_Immune_Deficiency	RCV000121261.1|RCV000352396.1	MedGen|MedGen	CN169374|CN239264	0.0004	.	0.0029	.	.	.	0.0004	0.0005	0.0013	0	0	0.0005	0.0011	0	0.0004	.	0.0006	.	.	0.0006	0.0005	0.0017	0.0047	0	0	0.0004	0.0015	0	0.0006	0.0006	0.0024
19	17947980	rs193922361	G	A	421.9	PASS	1	4110120	1	JAK3	nonsynonymous SNV	.	.	Likely pathogenic	Severe_combined_immunodeficiency_disease	RCV000030087.1	MeSH:MedGen:Orphanet:SNOMED_CT	D016511:C0085110:ORPHA183660:31323000	.	.	.	.	.	.	.	.	.	.	.	.	.	.	.	.	.	.	.	1.09e-05	0	0	0	0	0	1.28e-05	0.0002	0	.	.	.
19	18555641	.	T	G	149.1	PASS	1	358	1	ELL	nonsynonymous SNV	.	.	.	.	.	.	.	.	.	.	.	.	.	.	.	.	.	.	.	.	.	.	.	.	.	.	.	.	.	.	.	.	.	.	.	.	.	.
19	18557592	rs151228060	G	C	544	PASS	5	1380;1447;1468;588;4128849	1,1,1,1,1	ELL	nonsynonymous SNV	.	.	.	.	.	.	.	0.0006	.	0.0029	.	0.001	.	0.0009	0.0002	0.0012	0	0.0006	0.0013	0	6.13e-05	0.0014	0.0005	0.0019	.	.	0.001	0.0002	0.0013	0.0001	0	0.0005	0.0016	0.0005	9.75e-05	0.0017	0.0003	0.0012
19	18876306	rs138875847	C	T	550.7	PASS	8	045;1222;160;274;595;765;1371;1384	1,1,1,1,1,1,1,1	CRTC1	nonsynonymous SNV	COSM5020749;COSM5020750	1(soft_tissue)	.	.	.	.	.	0.0006	.	0.0029	.	0.001	.	0.0008	0	0.001	0	0.0002	0.0012	0.0011	0	0.0007	.	0.001	.	.	0.0009	6.54e-05	0.0015	0.0068	0	0.0003	0.0007	0.0011	0	0.0006	0	0.0012
19	30312632	.	A	C	273.8	PASS	1	122	1	CCNE1	nonsynonymous SNV	.	.	.	.	.	.	.	.	.	.	.	.	.	.	.	.	.	.	.	.	.	.	.	.	.	.	.	.	.	.	.	.	.	.	.	.	.	.
19	33372856	rs45470694	C	A	532.2	PASS	1	4179976	1	CEP89	stopgain	.	.	.	.	.	.	.	.	.	.	.	.	.	.	.	.	.	.	.	.	.	.	.	.	.	.	.	.	.	.	.	.	.	.	.	.	.	.
19	34687596	rs199997804	G	A	3177.8	PASS	2	395;1430	1,1	LSM14A	nonsynonymous SNV	.	.	.	.	.	.	.	0.0014	.	.	0.002	0.001	0.0041	0.0008	0	0.0002	0.0006	0	0.0004	0	0.004	0.0002	.	0.0002	.	0.0082	0.0007	6.55e-05	5.98e-05	0.0027	0.0002	0	0.0003	0.0009	0.0035	6.47e-05	0.0001	0
19	34706139	.	C	T	131.2	PASS	1	733	1	LSM14A	nonsynonymous SNV	.	.	.	.	.	.	.	.	.	.	.	.	.	.	.	.	.	.	.	.	.	.	.	.	.	.	.	.	.	.	.	.	.	.	.	.	.	.
19	34712530	.	G	A	421.6	PASS	1	4179894	1	LSM14A	nonsynonymous SNV	.	.	.	.	.	.	.	.	.	.	.	.	.	.	.	.	.	.	.	.	.	.	.	.	.	.	.	.	.	.	.	.	.	.	.	.	.	.
19	34712587	rs149275422	C	A	523	PASS	1	142	1	LSM14A	nonsynonymous SNV	.	.	.	.	.	.	.	0.0002	.	.	.	0.001	.	0.0002	0	0.001	0	0	0.0001	0	0	0.0001	.	0.0001	.	.	0.0002	0	0.0011	0	0	0	0.0001	0	0	.	.	.
19	34712631	.	T	G	214.7	PASS	1	757	1	LSM14A	nonsynonymous SNV	.	.	.	.	.	.	.	.	.	.	.	.	.	.	.	.	.	.	.	.	.	.	.	.	.	.	.	.	.	.	.	.	.	.	.	.	.	.
19	35827226	rs142629522	G	C	133	PASS	1	145	1	CD22	nonsynonymous SNV	.	.	.	.	.	.	.	0.0002	.	.	.	0.001	.	6.7e-05	0	0.0004	0	0	6.08e-05	0	0	0.0001	.	0.0001	.	.	0.0001	0	0.0004	0	0	0	0.0001	0.0002	0	6.46e-05	0.0002	0
19	40741948	.	C	T	218.9	PASS	1	824	1	AKT2	nonsynonymous SNV	.	.	.	.	.	.	.	.	.	.	.	.	.	.	.	.	.	.	.	.	.	.	.	.	.	.	.	.	.	.	.	.	.	.	.	.	.	.
19	42598028	rs200445754	G	A	1077.4	PASS	1	841	1	POU2F2	nonsynonymous SNV	COSM3823214;COSM3823213;COSM5202644	1(breast)	.	.	.	.	.	0.0002	0.0008	.	.	.	.	1.65e-05	9.63e-05	8.64e-05	0	0	0	0	0	.	.	.	0.011	.	2.45e-05	6.54e-05	3.02e-05	0	0	4.49e-05	2.69e-05	0	0	6.46e-05	0.0001	0
19	42788885	rs1342527965	C	T	262.2	PASS	1	4130865	1	CIC	nonsynonymous SNV	.	.	.	.	.	.	.	.	.	.	.	.	.	.	.	.	.	.	.	.	.	.	.	.	.	.	.	.	.	.	.	.	.	.	.	.	.	.
19	42795144	rs201439084	C	T	244.4	PASS	1	442	1	CIC	nonsynonymous SNV	COSM4985722	1(soft_tissue)	.	.	.	.	.	0.0006	.	0.0029	.	0.001	.	0.0003	0.0001	0.0014	0	0	0.0003	0.0023	0	0.0001	.	0.0001	.	.	0.0004	6.6e-05	0.0016	0	0	0	0.0003	0.0009	3.25e-05	0.0001	0	0
19	42796573	rs555135145	T	C	132.9	PASS	1	1053	1	CIC	nonsynonymous SNV	.	.	.	.	.	.	.	0.0002	.	0.0014	.	.	.	0.0001	0	0.001	0	0	9.49e-05	0	0	.	.	.	.	.	0.0002	0	0.0011	0	0	0	0.0001	0.0006	0	.	.	.
19	42796955	rs149948572	C	T	344.3	PASS	1	757	1	CIC	nonsynonymous SNV	.	.	.	.	.	.	.	0.0002	.	.	.	.	0.001	9.14e-05	9.9e-05	0.0003	0	0	7.57e-05	0	0.0001	0.0002	0.0005	0.0001	.	.	0.0001	0.0002	0.0003	0	0	0	9.03e-05	0	6.5e-05	6.47e-05	0.0001	0
19	50905173	rs41563714	C	T	663.7	PASS	2	1328;4193278	1,1	POLD1	nonsynonymous SNV	.	.	Uncertain significance|Uncertain significance	Colorectal_cancer_10|not_specified	RCV000230582.2|RCV000255386.1	Gene:MedGen:OMIM|MedGen	100271691:C2675481:612591|CN169374	0.0006	0.0008	0.0014	.	0.001	.	0.0005	0.0005	0.0004	0	0.0003	0.0007	0	6.06e-05	0.0005	0.0005	0.0006	.	.	0.0005	0.0003	0.0004	0	0.0002	0.0002	0.0008	0.0002	3.25e-05	0.0008	0	0
19	50916705	.	A	G	181.5	PASS	1	723	1	POLD1	nonsynonymous SNV	.	.	.	.	.	.	.	.	.	.	.	.	.	.	.	.	.	.	.	.	.	.	.	.	.	.	.	.	.	.	.	.	.	.	.	.	.	.
19	50917023	rs145473716	G	A	310.7	PASS	1	4110378	1	POLD1	nonsynonymous SNV	COSM3692994;COSM3692995	1(large_intestine)	other|Likely benign|Likely benign	Colorectal_cancer_10|Hereditary_cancer-predisposing_syndrome|not_specified	RCV000206687.2|RCV000210771.1|RCV000217194.2	Gene:MedGen:OMIM|MedGen:SNOMED_CT|MedGen	100271691:C2675481:612591|C0027672:699346009|CN169374	0.001	.	0.0043	0.002	.	.	0.0017	0	0.0005	0.0013	0	0.0023	0.0035	0.0024	0.0013	.	0.002	.	0.0082	0.0018	6.54e-05	0.0006	0.0213	0.0011	0	0.001	0.002	0.0027	0.0004	0	0
19	51378085	rs139063242	G	A	626.5	PASS	6	040;4116268;4136095;4152611;4182393;4182605	1,1,1,1,1,1	KLK2	nonsynonymous SNV	.	.	.	.	.	.	.	0.0006	.	0.0014	.	0.001	0.001	0.0018	0.0007	0.0007	0	0.0011	0.0027	0.0011	0.0007	0.0017	0.0007	0.0022	.	0.0082	0.002	0.0007	0.0014	0.0042	0	0.0011	0.003	0.0018	0.0007	0.0021	0.0006	0.0024
19	52714517	rs950558629	C	T	443	PASS	1	4113825	1	PPP2R1A	nonsynonymous SNV	.	.	.	.	.	.	.	.	.	.	.	.	.	.	.	.	.	.	.	.	.	.	.	.	.	.	.	.	.	.	.	.	.	.	.	.	.	.
19	52716236	rs945817997	C	T	299.5	PASS	1	4144951	1	PPP2R1A	nonsynonymous SNV	.	.	.	.	.	.	.	.	.	.	.	.	.	.	.	.	.	.	.	.	.	.	.	.	.	.	0	0	0	0	0	0	0	0	0	.	.	.
19	54646887	.	G	A	283.1	PASS	1	3	1	CNOT3	nonsynonymous SNV	COSM96799	1(breast);2(haematopoietic_and_lymphoid_tissue);1(urinary_tract);5(prostate)	.	.	.	.	.	.	.	.	.	.	.	.	.	.	.	.	.	.	.	.	.	.	.	.	.	.	.	.	.	.	.	.	.	.	.	.
19	54656002	.	C	T	844.8	PASS	1	116	1	CNOT3	nonsynonymous SNV	.	.	.	.	.	.	.	.	.	.	.	.	.	.	.	.	.	.	.	.	.	.	.	.	.	.	0	0	0	0	0	0	0	0	0	.	.	.
20	1918051	rs527874912	C	T	307.4	PASS	1	1220	1	SIRPA	nonsynonymous SNV	COSM2704814;COSM2704815	1(NS)	.	.	.	.	.	0.0002	.	0.0014	.	.	.	4.12e-05	0.0002	8.64e-05	0	0	3e-05	0	0	.	.	.	.	.	2.44e-05	0.0001	2.98e-05	0	0	0	1.79e-05	0	3.25e-05	0.0001	0.0002	0.0012
20	11900441	rs139514711	C	T	936.4	PASS	1	882	1	BTBD3	nonsynonymous SNV	COSM1024505	1(endometrium)	.	.	.	.	.	0.0006	.	0.0014	.	0.002	.	0.0002	0	0.0003	0	0	0.0003	0.0011	0	0.0002	.	0.0002	.	.	0.0002	0	0.0003	0	0	0	0.0003	0.0002	0.0002	0.0002	0	0
20	11900456	.	G	A	1426	PASS	1	381	1	BTBD3	nonsynonymous SNV	COSM1024506	1(large_intestine);1(endometrium)	.	.	.	.	.	.	.	.	.	.	.	.	.	.	.	.	.	.	.	.	.	.	.	.	.	.	.	.	.	.	.	.	.	.	.	.
20	11903546	.	G	T	1329.9	PASS	1	571	1	BTBD3	nonsynonymous SNV	.	.	.	.	.	.	.	.	.	.	.	.	.	.	.	.	.	.	.	.	.	.	.	.	.	.	.	.	.	.	.	.	.	.	.	.	.	.
20	11904138	.	A	G	275.3	PASS	1	4124795	1	BTBD3	nonsynonymous SNV	.	.	.	.	.	.	.	.	.	.	.	.	.	.	.	.	.	.	.	.	.	.	.	.	.	.	.	.	.	.	.	.	.	.	.	.	.	.
20	20018017	.	G	A	2989.3	PASS	1	621	1	CRNKL1	nonsynonymous SNV	.	.	.	.	.	.	.	.	.	.	.	.	.	.	.	.	.	.	.	.	.	.	.	.	.	.	.	.	.	.	.	.	.	.	.	.	.	.
20	20026029	rs112980877	C	T	663.2	PASS	4	1167;1277;314;4104893	1,1,1,1	CRNKL1	nonsynonymous SNV	.	.	.	.	.	.	.	0.0002	.	.	.	0.001	.	0.0005	0.0002	0.0003	0	0.0002	0.0008	0	0	0.0012	0.0005	0.0015	.	.	0.0005	0.0002	0.0002	0	0	8.97e-05	0.001	0.0007	0	0.0004	0	0.0012
20	31021182	rs201899433	G	A	444.5	PASS	1	4170686	1	ASXL1	nonsynonymous SNV	.	.	.	.	.	.	.	0.0002	.	.	0.001	.	.	6.59e-05	9.61e-05	0	0	0	7.5e-05	0	0.0001	.	.	.	.	.	6.09e-05	6.54e-05	2.98e-05	0	0	4.48e-05	8.95e-05	0	6.5e-05	9.69e-05	0	0
20	35533855	.	G	GC	190.4	PASS	1	1239	1	SAMHD1	frameshift insertion
20	35539670	.	A	C	2541.7	PASS	1	188	1	SAMHD1	stopgain	.	.	.	.	.	.	.	.	.	.	.	.	.	.	.	.	.	.	.	.	.	.	.	.	.	.	.	.	.	.	.	.	.	.	.	.	.	.
20	39704855	.	C	T	485.9	PASS	1	173	1	TOP1	nonsynonymous SNV	.	.	.	.	.	.	.	.	.	.	.	.	.	.	.	.	.	.	.	.	.	.	.	.	.	.	.	.	.	.	.	.	.	.	.	.	.	.
20	39794408	.	G	A	197	PASS	1	177	1	PLCG1	nonsynonymous SNV	.	.	.	.	.	.	.	.	.	.	.	.	.	.	.	.	.	.	.	.	.	.	.	.	.	.	.	.	.	.	.	.	.	.	.	.	.	.
20	39796561	.	A	G	356.5	PASS	1	1257	1	PLCG1	nonsynonymous SNV	.	.	.	.	.	.	.	.	.	.	.	.	.	.	.	.	.	.	.	.	.	.	.	.	.	.	.	.	.	.	.	.	.	.	.	.	.	.
20	39802595	.	A	T	2034	PASS	1	345	1	PLCG1	nonsynonymous SNV	.	.	.	.	.	.	.	.	.	.	.	.	.	.	.	.	.	.	.	.	.	.	.	.	.	.	.	.	.	.	.	.	.	.	.	.	.	.
20	39802920	.	C	A	1700.3	PASS	1	854	1	PLCG1	nonsynonymous SNV	.	.	.	.	.	.	.	.	.	.	.	.	.	.	.	.	.	.	.	.	.	.	.	.	.	.	.	.	.	.	.	.	.	.	.	.	.	.
20	40713385	rs180871064	C	T	381.9	PASS	1	842	1	PTPRT	nonsynonymous SNV	COSM5366032;COSM5366033	1(large_intestine)	.	.	.	.	.	0.0002	.	0.0014	.	.	.	1.71e-05	0	0	0	0	3.05e-05	0	0	.	.	.	.	.	1.3e-05	0	0	0	0	0	2.79e-05	0	0	.	.	.
20	40733305	rs201162919	G	T	362.6	PASS	2	1441;4170844	1,1	PTPRT	nonsynonymous SNV	COSM4989563;COSM4989562	2(soft_tissue)	.	.	.	.	.	0.0004	.	0.0029	.	.	.	0.0011	0.0001	0.0006	0	0.0008	0.0016	0.0011	0.0007	0.0007	0.0002	0.001	.	.	0.0009	6.54e-05	0.0005	0	0	0.0006	0.0015	0.0013	0.0008	0.0008	0.0003	0.0012
20	40944545	rs200852571	G	A	215.6	PASS	1	306	1	PTPRT	nonsynonymous SNV	.	.	.	.	.	.	.	0.0002	.	.	.	0.001	.	2.48e-05	0	0	0	0	4.5e-05	0	0	.	.	.	.	.	3.27e-05	0	2.98e-05	0	0	0	5.45e-05	0	3.25e-05	9.69e-05	0	0.0012
20	41101050	rs192944843	C	T	544	PASS	2	1312;1418	1,1	PTPRT	nonsynonymous SNV	.	.	.	.	.	.	.	0.0004	.	.	.	0.002	.	0.0009	0.0004	0.0004	0	0.0002	0.0011	0	0.001	0.0009	0.0005	0.0012	.	.	0.001	0.0004	0.0009	0.0001	5.8e-05	0.0005	0.0014	0.0009	0.001	0.0015	0.0002	0
20	41419894	.	T	C	770.4	PASS	1	267	1	PTPRT	nonsynonymous SNV	.	.	.	.	.	.	.	.	.	.	.	.	.	.	.	.	.	.	.	.	.	.	.	.	.	.	.	.	.	.	.	.	.	.	.	.	.	.
20	43955989	rs145789563	C	T	162.5	PASS	1	4135099	1	SDC4	nonsynonymous SNV	.	.	.	.	.	.	.	0.0002	.	.	.	0.001	.	0.0001	9.63e-05	0.0003	0	0	0.0002	0	6.06e-05	0.0003	.	0.0005	.	.	0.0001	0.0001	0.0001	0	0	0	0.0002	0.0002	3.25e-05	0.0002	0.0002	0
20	50048830	rs139027658	C	T	382.5	PASS	3	1228;124;1078	1,1,1	NFATC2	nonsynonymous SNV	.	.	.	.	.	.	.	0.0008	.	0.0014	.	0.003	.	0.0007	0	0.0014	0	0	0.001	0.0011	0	0.0009	0.0002	0.0013	.	0.0082	0.0009	6.54e-05	0.002	0.0064	0	0	0.0008	0.0011	0	0.0005	0.0002	0
20	50049203	rs1047594592	T	C	82.4	PASS	1	312	1	NFATC2	nonsynonymous SNV	.	.	.	.	.	.	.	.	.	.	.	.	.	.	.	.	.	.	.	.	.	.	.	.	.	.	0	0	0	0	0	0	0	0	0	.	.	.
20	50140590	.	C	A	325	PASS	1	122	1	NFATC2	nonsynonymous SNV	.	.	.	.	.	.	.	.	.	.	.	.	.	.	.	.	.	.	.	.	.	.	.	.	.	.	.	.	.	.	.	.	.	.	.	.	.	.
20	50407179	.	C	T	228.8	PASS	1	168	1	SALL4	nonsynonymous SNV	.	.	.	.	.	.	.	.	.	.	.	.	.	.	.	.	.	.	.	.	.	.	.	.	.	.	.	.	.	.	.	.	.	.	.	.	.	.
20	50407735	rs143818932	A	C	633.5	PASS	2	040;596	1,1	SALL4	nonsynonymous SNV	.	.	Likely benign|Uncertain significance	SALL4-Related_Spectrum_Disorders|not_specified	RCV000315629.1|RCV000391761.1	MedGen|MedGen	CN239401|CN169374	0.0004	.	.	.	0.002	.	0.001	9.64e-05	0.0007	0	0.0003	0.0016	0.0011	6.06e-05	0.0009	0.0002	0.0013	.	.	0.001	0.0003	0.0015	0.0001	0	0.0004	0.0016	0.0011	3.25e-05	0.0006	0.0001	0
20	57429275	.	G	A	595.4	PASS	1	4128435	1	GNAS	nonsynonymous SNV	.	.	.	.	.	.	.	.	.	.	.	.	.	.	.	.	.	.	.	.	.	.	.	.	.	.	.	.	.	.	.	.	.	.	.	.	.	.
20	62164907	rs553979804	G	A	1259.2	PASS	1	350	1	PTK6	stopgain	.	.	.	.	.	.	.	0.0002	.	.	.	0.001	.	2.59e-05	0	8.7e-05	0	0	3.08e-05	0	0	.	.	.	.	.	4.55e-05	0	0.0002	0	0	0	5.47e-05	0	0	.	.	.
20	62165009	.	C	T	534.1	PASS	1	12	1	PTK6	nonsynonymous SNV	.	.	.	.	.	.	.	.	.	.	.	.	.	.	.	.	.	.	.	.	.	.	.	.	.	.	.	.	.	.	.	.	.	.	.	.	.	.
21	36231833	.	G	A	563.8	PASS	1	1295	1	RUNX1	nonsynonymous SNV	COSM4873659;COSM1030461	1(endometrium)	.	.	.	.	.	.	.	.	.	.	.	.	.	.	.	.	.	.	.	.	.	.	.	.	.	.	.	.	.	.	.	.	.	.	.	.
21	42842574	.	C	T	444.2	PASS	1	4107990	1	TMPRSS2	splice_donor
21	42860331	.	C	G	266.3	PASS	1	4187640	1	TMPRSS2	nonsynonymous SNV	.	.	.	.	.	.	.	.	.	.	.	.	.	.	.	.	.	.	.	.	.	.	.	.	.	.	.	.	.	.	.	.	.	.	.	.	.	.
21	42860339	.	C	T	489.6	PASS	1	800	1	TMPRSS2	nonsynonymous SNV	.	.	.	.	.	.	.	.	.	.	.	.	.	.	.	.	.	.	.	.	.	.	.	.	.	.	.	.	.	.	.	.	.	.	.	.	.	.
21	44513271	rs140932020	C	T	125.5	PASS	1	4158483	1	U2AF1	nonsynonymous SNV	.	.	.	.	.	.	.	0.0002	.	0.0014	.	.	.	2.49e-05	9.8e-05	8.66e-05	0	0	1.51e-05	0	0	0.0002	0.0002	0.0001	.	.	2.44e-05	6.6e-05	2.98e-05	0	0	0	2.69e-05	0	3.25e-05	3.25e-05	0.0001	0
22	19171074	rs527763206;rs375471950	C	CT	1181.8	PASS	2	362;4124795	1,1	CLTCL1	frameshift insertion	.	.	.	.	.	.	.	0.0012	0.0008	0.0043	.	0.002	.	0.0005	0.0004	0.001	0	0	0.0006	0.0034	0	0.0004	0.0002	0.0005	.	.	0.0005	0.0005	0.001	0.0026	0	0	0.0005	0.0016	0	0.0003	0.0002	0
22	19175143	rs201296558	G	A	904.7	PASS	1	815	1	CLTCL1	nonsynonymous SNV	COSM3693932;COSM3693931	1(large_intestine)	.	.	.	.	.	0.0002	.	.	.	0.001	.	0.0011	0.0001	0.0004	0	0	0.0016	0	0.0009	0.0013	0.0005	0.0017	.	.	0.001	0.0002	0.0004	0.0028	0	0	0.0016	0.0013	0.0008	0.0005	0.0006	0
22	19175213	rs55790642	C	T	243.7	PASS	1	785	1	CLTCL1	nonsynonymous SNV	.	.	.	.	.	.	.	0.0004	.	.	0.001	.	0.001	0.0004	0	8.89e-05	0	0	0.0004	0	0.0013	0.0002	.	0.0002	.	.	0.0004	0	0	0.0011	0	0	0.0004	0.0004	0.0014	0.0002	0	0.0012
22	19184010	rs556579608	T	C	759.9	PASS	1	797	1	CLTCL1	nonsynonymous SNV	COSM4672964;COSM4672963	1(large_intestine)	.	.	.	.	.	0.0002	.	0.0014	.	.	.	8.29e-06	0	8.66e-05	0	0	0	0	0	.	.	.	.	.	2.84e-05	0	0.0002	0	0	0	0	0.0002	0	.	.	.
22	19209588	.	A	C	574.7	PASS	1	1323	1	CLTCL1	nonsynonymous SNV	.	.	.	.	.	.	.	.	.	.	.	.	.	.	.	.	.	.	.	.	.	.	.	.	.	.	.	.	.	.	.	.	.	.	.	.	.	.
22	19211467	rs181639433	T	A	358.6	PASS	5	1452;4163639;4183924;4187640;4199848	1,1,1,1,1	CLTCL1	nonsynonymous SNV	COSM5021139;COSM5021138	1(soft_tissue)	.	.	.	.	.	0.001	.	0.0014	.	0.004	.	0.0023	0.0004	0.0003	0	0.0018	0.0038	0.0011	0	0.0027	0.0007	0.0037	.	.	0.002	0.0003	0.0004	0.0002	0	0.0022	0.0037	0.0018	0	0.002	0.001	0
22	19222211	rs199652160	C	T	1574.8	PASS	2	144;447	1,1	CLTCL1	nonsynonymous SNV	.	.	other	not_provided	RCV000413114.2	MedGen	CN221809	0.0004	.	0.0014	.	0.001	.	0.0005	0.0002	0.0013	0	0.0002	0.0006	0	0.0001	0.0005	0.0007	0.0004	.	.	0.0005	0.0003	0.0008	0	0	4.49e-05	0.0007	0.0013	6.5e-05	0.0003	0.0002	0.0024
22	19226874	rs147685377	T	C	3846.2	PASS	10	034;146;147;302;583;772;1101;4101815;4114033;4159421	1,1,1,1,1,1,1,1,1,1	CLTCL1	nonsynonymous SNV	.	.	.	.	.	.	.	0.0006	.	0.0029	.	0.001	.	0.0018	0.001	0.0021	0	0.0005	0.0028	0.0011	0	0.0028	0.0011	0.0036	.	.	0.0019	0.0006	0.0027	0	0	0.0003	0.0032	0.0027	0	0.0021	0.0006	0.0024
22	19241669	rs371582873	C	G	883.4	PASS	1	794	1	CLTCL1	nonsynonymous SNV	.	.	.	.	.	.	.	0.0002	.	.	.	0.001	.	4.27e-05	0	0.0003	0	0	3.09e-05	0	0	0.0001	.	0.0001	.	.	3.66e-05	0	0.0002	0	0	0	1.79e-05	0	0	.	.	.
22	20073836	.	A	G	597.8	PASS	1	571	1	DGCR8	nonsynonymous SNV	.	.	.	.	.	.	.	.	.	.	.	.	.	.	.	.	.	.	.	.	.	.	.	.	.	.	.	.	.	.	.	.	.	.	.	.	.	.
22	20073919	rs118025402	C	T	393.1	PASS	1	4169012	1	DGCR8	nonsynonymous SNV	.	.	.	.	.	.	.	0.0006	.	.	0.003	.	.	0.0001	0.0002	0	0.001	0	1.5e-05	0	6.06e-05	0.0002	0.0005	.	.	.	0.0001	0.0005	0	0	0.0011	0	1.79e-05	0	3.25e-05	6.47e-05	0.0002	0
22	20097585	rs148884257	C	T	340	PASS	1	505	1	DGCR8	nonsynonymous SNV	.	.	.	.	.	.	.	0.0006	0.0015	0.0014	.	.	.	0.0003	0.0007	0.0007	0	0	0.0003	0	6.07e-05	0.0002	0.0005	.	.	.	0.0004	0.0008	0.0017	0	0	0	0.0003	0.0007	3.25e-05	0.0004	0.0008	0.0036
22	21348954	rs139368531	G	A	332	PASS	2	1425;4122063	1,1	LZTR1	nonsynonymous SNV	.	.	.	.	.	.	.	0.0006	.	.	.	0.003	.	0.0003	0.0003	0	0	0.0031	0.0003	0	0	0.0005	0.0002	0.0006	.	.	0.0005	0.0001	0.0003	0	0	0.0031	0.0003	0.0005	0	0.0006	0.0002	0
22	23523988	.	A	C	505.5	PASS	1	4182605	1	BCR	nonsynonymous SNV	.	.	.	.	.	.	.	.	.	.	.	.	.	.	.	.	.	.	.	.	.	.	.	.	.	.	.	.	.	.	.	.	.	.	.	.	.	.
22	23615924	rs1020634700	C	T	461.3	PASS	3	124;171;725	1,1,1	BCR	nonsynonymous SNV	.	.	.	.	.	.	.	.	.	.	.	.	.	.	.	.	.	.	.	.	.	.	.	.	.	.	.	.	.	.	.	.	.	.	.	.	.	.
22	23615950	.	A	G	666.1	PASS	1	829	1	BCR	nonsynonymous SNV	.	.	.	.	.	.	.	.	.	.	.	.	.	.	.	.	.	.	.	.	.	.	.	.	.	.	.	.	.	.	.	.	.	.	.	.	.	.
22	28193077	rs1266340952	G	A	534.1	PASS	1	1430	1	MN1	nonsynonymous SNV	.	.	.	.	.	.	.	.	.	.	.	.	.	.	.	.	.	.	.	.	.	.	.	.	.	.	.	.	.	.	.	.	.	.	.	.	.	.
22	28193317	rs1159987506	G	T	488.8	PASS	1	505	1	MN1	nonsynonymous SNV	.	.	.	.	.	.	.	.	.	.	.	.	.	.	.	.	.	.	.	.	.	.	.	.	.	.	0	0	0	0	0	0	0	0	0	.	.	.
22	28196476	rs200030766	C	T	637.7	PASS	2	382;1192	1,1	MN1	nonsynonymous SNV	.	.	.	.	.	.	.	0.0006	0.0008	0.0014	.	0.001	.	0.0012	0.0003	0.0011	0	0	0.0017	0	0.0007	0.0011	0.0003	0.0014	.	.	0.0011	0.0004	0.0009	0.0001	0	8.97e-05	0.0019	0.0013	0.0008	0.0008	0.0002	0
22	29445447	rs200654061	C	G	545	PASS	4	1386;753;783;753	1,1,1,1	ZNRF3	nonsynonymous SNV	.	.	.	.	.	.	.	0.0006	.	0.0014	.	0.002	.	0.0011	0.0001	0.0003	0	0.0006	0.0018	0	6.26e-05	0.0015	0.0005	0.002	.	.	0.0009	0.0001	0.0003	0	0	0.0004	0.0017	0.0007	9.79e-05	0.0006	0.0003	0
22	29446577	.	C	T	218.4	PASS	1	4113140	1	ZNRF3	nonsynonymous SNV	.	.	.	.	.	.	.	.	.	.	.	.	.	.	.	.	.	.	.	.	.	.	.	.	.	.	.	.	.	.	.	.	.	.	.	.	.	.
22	29446903	rs199737518	C	A	763.7	PASS	1	4114033	1	ZNRF3	nonsynonymous SNV	COSM4987298;COSM4987297	1(soft_tissue)	.	.	.	.	.	0.0002	.	.	.	0.001	.	0.0011	0	0.0008	0	0.0003	0.0016	0	0.0001	0.0007	.	0.0011	.	.	0.0007	0	0.0002	0	0	0.0006	0.0013	0.0013	0	0.0005	0.0002	0.0012
22	31722884	rs144494015	C	T	516.1	PASS	2	053;330	1,1	PATZ1	nonsynonymous SNV	.	.	.	.	.	.	.	0.0006	0.0015	0.0014	.	.	.	0.0003	0.0006	0.0004	0	0	0.0002	0.0011	0.0002	0.0003	0.0002	0.0003	.	.	0.0003	0.0006	0.0004	0.0002	5.83e-05	0	0.0003	0.0013	0.0002	0.0004	0.0007	0.0024
22	35478513	.	G	T	721.6	PASS	1	4110498	1	ISX	stopgain	.	.	.	.	.	.	.	.	.	.	.	.	.	.	.	.	.	.	.	.	.	.	.	.	.	.	.	.	.	.	.	.	.	.	.	.	.	.
22	35478663	rs149896833	G	A	437.2	PASS	3	1426, 1525, 398	1,1,1	ISX	splice_donor
22	36681953	.	C	G	613.8	PASS	1	1565	1	MYH9	nonsynonymous SNV	.	.	.	.	.	.	.	.	.	.	.	.	.	.	.	.	.	.	.	.	.	.	.	.	.	.	.	.	.	.	.	.	.	.	.	.	.	.
22	36682873	rs142094977	A	G	1069.2	PASS	4	018;475;4139483;4144131	1,1,1,1	MYH9	nonsynonymous SNV	.	.	Uncertain significance|Likely benign|Likely benign	not_specified|MYH9-related_disorder|Nonsyndromic_Hearing_Loss\x2c_Dominant	RCV000037565.2|RCV000338710.1|RCV000392887.1	MedGen|MedGen|MedGen	CN169374|CN239288|CN239435	0.0006	0.0008	.	.	0.002	.	0.0013	0.0005	0	0	0.0014	0.0021	0	0	0.0012	0.0007	0.0014	.	0.016	0.0013	0.0005	0.0001	0.0015	0	0.0014	0.0023	0.0009	0	0.0039	0.0002	0
22	36685292	rs139134727	G	A	963.4	PASS	6	1075;1543;308;869;4128435;4178310	1,1,2,1,1,1	MYH9	nonsynonymous SNV	COSM1235622	1(haematopoietic_and_lymphoid_tissue)	other|Likely benign|Likely benign	not_specified|MYH9-related_disorder|Nonsyndromic_Hearing_Loss\x2c_Dominant	RCV000151329.2|RCV000293752.1|RCV000348717.1	MedGen|MedGen|MedGen	CN169374|CN239288|CN239435	0.0004	.	.	.	0.001	0.001	0.0021	0.0005	0.0006	0.0002	0.0004	0.0031	0.0024	0.0015	0.0033	0.0007	0.0047	.	.	0.0019	0.0003	0.001	0.0006	0.0001	0.0004	0.0031	0.0026	0.0014	0.0018	0.0005	0.0048
22	36689909	rs141582478	C	T	465	PASS	1	1292	1	MYH9	nonsynonymous SNV	.	.	.	.	.	.	.	0.0002	.	.	0.001	.	.	6.76e-05	0	0.0001	0.0001	0	8.78e-05	0	0	0.0001	.	0.0001	.	.	5.76e-05	0	2.99e-05	0	5.84e-05	0	0.0001	0	0	6.46e-05	0.0001	0
22	36696191	rs199520053	C	G	860.5	PASS	1	139	1	MYH9	nonsynonymous SNV	.	.	.	.	.	.	.	0.0002	.	.	.	0.001	.	3.31e-05	0	0.0002	0	0	3.01e-05	0	0	.	.	.	.	.	3.67e-05	0	5.96e-05	0	0	0	5.37e-05	0.0002	0	.	.	.
22	36696921	.	C	G	807	PASS	1	339	1	MYH9	nonsynonymous SNV	.	.	.	.	.	.	.	.	.	.	.	.	.	.	.	.	.	.	.	.	.	.	.	.	.	.	.	.	.	.	.	.	.	.	.	.	.	.
22	36745275	rs56200894	G	C	2023	PASS	7	1063;1403;1565;160;315;794;878	1,1,1,1,1,1,1	MYH9	nonsynonymous SNV	.	.	Benign|Likely benign|Likely benign	not_specified|MYH9-related_disorder|Nonsyndromic_Hearing_Loss\x2c_Dominant	RCV000155187.1|RCV000298717.1|RCV000369754.1	MedGen|MedGen|MedGen	CN169374|CN239288|CN239435	0.0008	.	0.0029	.	0.002	.	0.0015	0.0008	0.002	0	0.0009	0.0021	0.0023	0.0002	0.0024	0.0011	0.003	.	0.0082	0.0016	0.0007	0.0024	0	0	0.0005	0.0024	0.0026	0.0002	0.0016	0.0005	0.0048
22	39629493	rs190122588	C	T	308.7	PASS	1	1221	1	PDGFB	nonsynonymous SNV	.	.	.	.	.	.	.	0.0002	.	0.0014	.	.	.	8.26e-06	0	8.65e-05	0	0	0	0	0	.	.	.	.	.	1.75e-05	0	6.65e-05	0	0.0001	0	0	0	0	.	.	.
22	41545151	rs201480900	C	T	971.4	PASS	2	273;4122063	1,1	EP300	nonsynonymous SNV	COSM5608368	1(skin)	.	.	.	.	.	0.0002	.	0.0014	.	.	.	0.0002	0	0.0002	0	0	0.0003	0	0	0.0002	.	0.0002	.	.	0.0001	0	0.0001	0.0001	0	0	0.0002	0.0004	0	0.0001	0.0002	0
22	41573601	.	G	C	408.2	PASS	1	4105782	1	EP300	nonsynonymous SNV	.	.	.	.	.	.	.	.	.	.	.	.	.	.	.	.	.	.	.	.	.	.	.	.	.	.	.	.	.	.	.	.	.	.	.	.	.	.
22	41573623	rs1437362111	C	T	291.5	PASS	1	38	1	EP300	nonsynonymous SNV	.	.	.	.	.	.	.	.	.	.	.	.	.	.	.	.	.	.	.	.	.	.	.	.	.	.	.	.	.	.	.	.	.	.	.	.	.	.
22	41574718	.	C	G	1537.8	PASS	1	34	1	EP300	nonsynonymous SNV	.	.	.	.	.	.	.	.	.	.	.	.	.	.	.	.	.	.	.	.	.	.	.	.	.	.	.	.	.	.	.	.	.	.	.	.	.	.
X	24197650	rs150375972	G	A	4419.5	PASS	3	319;626;4169012	2,1,1	ZFX	nonsynonymous SNV	.	.	.	.	.	.	.	0.0008	.	.	.	0.0039	.	0.0011	0.0001	0.0003	0	0	0.0018	0	0.0003	0.0012	0.0003	0.0018	.	.	0.0011	0.0002	0.0009	0	0	6.08e-05	0.0021	0.001	0.0002	0.0012	0.0003	0
X	39932564	rs144722432	C	T	909.1	PASS	1	1260	2	BCOR	nonsynonymous SNV	.	.	other	not_specified	RCV000193574.2	MedGen	CN169374	0.0003	.	0.0019	.	.	.	0.0006	0.0001	0.0008	0	0.0003	0.001	0.0019	0	0.0006	.	0.0009	.	.	0.0007	0.0003	0.0009	0.0001	0	6.38e-05	0.0011	0.0008	0	0.0004	0.0002	0
X	41201846	.	G	A	455.2	PASS	1	4136702	1	DDX3X	nonsynonymous SNV	.	.	.	.	.	.	.	.	.	.	.	.	.	.	.	.	.	.	.	.	.	.	.	.	.	.	.	.	.	.	.	.	.	.	.	.	.	.
X	44920638	.	T	G	349.8	PASS	1	4131095	1	KDM6A	nonsynonymous SNV	.	.	.	.	.	.	.	.	.	.	.	.	.	.	.	.	.	.	.	.	.	.	.	.	.	.	.	.	.	.	.	.	.	.	.	.	.	.
X	47039858	.	T	A	249.3	PASS	1	4113825	1	RBM10	nonsynonymous SNV	.	.	.	.	.	.	.	.	.	.	.	.	.	.	.	.	.	.	.	.	.	.	.	.	.	.	.	.	.	.	.	.	.	.	.	.	.	.
X	48649629	rs372131208	C	T	242.9	PASS	1	312	1	GATA1	nonsynonymous SNV	.	.	.	.	.	.	.	0.0003	.	.	.	0.0013	.	0.0005	0	0.0012	0	0	0.0005	0.0027	0.001	0.0001	.	0.0001	.	.	0.0005	0	0.0013	0.0014	0	0	0.0002	0.0011	0.0011	0.0003	0.0002	0.0032
X	63412766	rs146489129	T	G	1442.5	PASS	2	766;1191	2,1	AMER1	nonsynonymous SNV	.	.	.	.	.	.	.	0.0003	.	0.0019	.	.	.	0.0012	0.0002	0.0005	0	0.002	0.0019	0	0	0.0018	0.0003	0.0027	.	.	0.0013	0.0003	0.0006	0.004	0	0.0019	0.0019	0.0005	0	0.0018	0.0007	0.0016
X	66931348	.	C	T	307.7	PASS	1	396	1	AR	nonsynonymous SNV	.	.	.	.	.	.	.	.	.	.	.	.	.	.	.	.	.	.	.	.	.	.	.	.	.	.	.	.	.	.	.	.	.	.	.	.	.	.
X	66941675	.	G	C	1772.6	PASS	1	298	2	AR	nonsynonymous SNV	.	.	.	.	.	.	.	.	.	.	.	.	.	.	.	.	.	.	.	.	.	.	.	.	.	.	.	.	.	.	.	.	.	.	.	.	.	.
X	70357732	.	C	T	447.4	PASS	1	820	1	MED12	nonsynonymous SNV	.	.	.	.	.	.	.	.	.	.	.	.	.	.	.	.	.	.	.	.	.	.	.	.	.	.	.	.	.	.	.	.	.	.	.	.	.	.
X	70597480	.	C	T	646.7	PASS	1	4107990	1	TAF1	nonsynonymous SNV	.	.	.	.	.	.	.	.	.	.	.	.	.	.	.	.	.	.	.	.	.	.	.	.	.	.	.	.	.	.	.	.	.	.	.	.	.	.
X	70674681	rs1184861702	A	G	371.6	PASS	1	1257	1	TAF1	nonsynonymous SNV	.	.	.	.	.	.	.	.	.	.	.	.	.	.	.	.	.	.	.	.	.	.	.	.	.	.	.	.	.	.	.	.	.	.	.	.	.	.
X	76776381	.	A	G	531.3	PASS	1	4177842	1	ATRX	nonsynonymous SNV	.	.	.	.	.	.	.	.	.	.	.	.	.	.	.	.	.	.	.	.	.	.	.	.	.	.	.	.	.	.	.	.	.	.	.	.	.	.
X	123224518	.	C	G	277	PASS	1	721	1	STAG2	nonsynonymous SNV	.	.	.	.	.	.	.	.	.	.	.	.	.	.	.	.	.	.	.	.	.	.	.	.	.	.	.	.	.	.	.	.	.	.	.	.	.	.
X	129156896	.	G	A	1844.2	PASS	1	880	2	BCORL1	nonsynonymous SNV	COSM1682880	1(ovary)	.	.	.	.	.	.	.	.	.	.	.	.	.	.	.	.	.	.	.	.	.	.	.	0.0082	.	.	.	.	.	.	.	.	.	.	.	.
X	129159223	.	A	G	499.2	PASS	1	4177639	1	BCORL1	nonsynonymous SNV	.	.	.	.	.	.	.	.	.	.	.	.	.	.	.	.	.	.	.	.	.	.	.	.	.	.	.	.	.	.	.	.	.	.	.	.	.	.
X	129200878	rs141284451	G	A	1053.9	PASS	1	326	1	ELF4	nonsynonymous SNV	.	.	.	.	.	.	.	0.0013	.	0.0038	.	0.0039	.	0.003	0.0005	0.0013	0.0023	0.002	0.0045	0.0048	0.0006	0.0026	0.0008	0.0036	.	.	0.0026	0.0003	0.001	0	0.0024	0.0025	0.0043	0.003	0.0006	0.0028	0.0012	0
X	132887574	.	G	T	873.2	PASS	1	1472	2	GPC3	nonsynonymous SNV	.	.	.	.	.	.	.	.	.	.	.	.	.	.	.	.	.	.	.	.	.	.	.	.	.	.	.	.	.	.	.	.	.	.	.	.	.	.
X	147030322	rs45540244	C	T	1718.4	PASS	1	626	1	FMR1	nonsynonymous SNV	.	.	Benign	not_specified	RCV000079964.4	MedGen	CN169374	0.0005	.	.	.	0.0026	.	0.0009	0.0002	0.0004	0	0	0.0015	0.0016	0.0002	0.0017	.	0.0027	0.011	.	0.001	0.0004	0.0003	0.0027	0	0	0.0017	0.0007	0.0003	0.001	0	0
X	152807810	rs62642960	A	C	325.2	PASS	1	4174742	1	ATP2B3	nonsynonymous SNV	.	.	.	.	.	.	.	0.0005	.	.	.	0.0026	.	0.0019	0.0005	0.0001	0	0	0.0034	0	0	0.0029	0.001	0.004	.	.	0.0021	0.0005	0.0002	0.0032	0	0.0001	0.0041	0.0022	0	0.0019	0.0002	0.0016
X	152815594	.	T	C	223.7	PASS	1	1078	1	ATP2B3	nonsynonymous SNV	.	.	.	.	.	.	.	.	.	.	.	.	.	.	.	.	.	.	.	.	.	.	.	.	.	.	.	.	.	.	.	.	.	.	.	.	.	.
X	152826218	.	C	T	958.8	PASS	1	307	1	ATP2B3	nonsynonymous SNV	.	.	.	.	.	.	.	.	.	.	.	.	.	.	.	.	.	.	.	.	.	.	.	.	.	.	.	.	.	.	.	.	.	.	.	.	.	.
X	153590073	.	T	A	905.4	PASS	1	841	1	FLNA	nonsynonymous SNV	.	.	.	.	.	.	.	.	.	.	.	.	.	.	.	.	.	.	.	.	.	.	.	.	.	.	.	.	.	.	.	.	.	.	.	.	.	.
X	153599586	.	G	A	317.7	PASS	1	1386	1	FLNA	stopgain	.	.	.	.	.	.	.	.	.	.	.	.	.	.	.	.	.	.	.	.	.	.	.	.	.	.	.	.	.	.	.	.	.	.	.	.	.	.
X	153629244	rs782769153	C	G	537	PASS	1	4148261	1	RPL10	stopgain	.	.	.	.	.	.	.	0.0003	.	.	.	0.0013	.	6.74e-05	0	0	0	0	0.0001	0	0	.	.	.	.	.	8.88e-05	0	0	0	0	0	0.0002	0.0005	0	4.61e-05	0	0
X	154299814	.	G	T	327.1	PASS	1	1223	1	BRCC3	nonsynonymous SNV	.	.	.	.	.	.	.	.	.	.	.	.	.	.	.	.	.	.	.	.	.	.	.	.	.	.	.	.	.	.	.	.	.	.	.	.	.	.
X	154305469	rs28997578	A	G	1817.7	PASS	2	197;1353	1,1	BRCC3	nonsynonymous SNV	.	.	.	.	.	.	.	0.0008	.	0.0019	.	0.0026	.	0.001	0	0.0001	0	0	0.0018	0	0.0005	0.0011	.	0.0017	.	.	0.001	0	0.0002	0.0078	0	0	0.0013	0.0002	0.0006	0.0005	0.0002	0.0016
X	154319075	.	A	G	245.4	PASS	1	1276	1	BRCC3	nonsynonymous SNV	.	.	.	.	.	.	.	.	.	.	.	.	.	.	.	.	.	.	.	.	.	.	.	.	.	.	.	.	.	.	.	.	.	.	.	.	.	.
[truncated: 5 more columns]
