# Supplementary material for: Detection of Rare Germline Variants in the Genomes of B Cell Neoplasms
Source: Preprints.org preprint supplement (doi:10.20944/preprints202101.0330.v1), 2021-01-18
Supplement: Supplementary file 3 [file Supplementary Table 10.xlsx]

## Sheet: Sheet1
#CHROM	POS	ID	REF	ALT	QUAL	FILTER	Cases	INFO
6	36839543	rs115690696	G	A	1752.2	PASS	9	gene=PPIL1;AB=0.460317;ABP=3.872;AO=29;CALLERS=freebayes,gatk-haplotype,platypus,samtools;CIGAR=1X;DPB=63;DPRA=0;EPP=4.88226;EPPR=15.5282;GTI=0;LEN=1;MEANALT=1;MQM=60;MQMR=60;NS=1;NUMALT=1;ODDS=126.436;PAIRED=1;PAIREDR=1;PAO=0;PQA=0;PQR=0;PRO=0;QA=889;QR=1020;RO=34;RPL=19;RPP=9.07545;RPPR=3.26577;RPR=10;RUN=1;SAF=13;SAP=3.68421;SAR=16;SRF=10;SRP=15.5282;SRR=24;TYPE=snp;technology.illumina=1;CSQ=A…
9	5126715	rs142269166	A	G	629	PASS	11	gene=JAK2;AB=0.442308;ABP=4.51363;AO=23;CALLERS=freebayes,gatk-haplotype,platypus,samtools;CIGAR=1X;DPB=52;DPRA=0;EPP=3.10471;EPPR=3.08518;GTI=0;LEN=1;MEANALT=1;MQM=60;MQMR=60;NS=1;NUMALT=1;ODDS=112.353;PAIRED=1;PAIREDR=1;PAO=0;PQA=0;PQR=0;PRO=0;QA=791;QR=1015;RO=29;RPL=8;RPP=7.63648;RPPR=3.08518;RPR=15;RUN=1;SAF=17;SAP=14.4341;SAR=6;SRF=20;SRP=12.0706;SRR=9;TYPE=snp;technology.illumina=1;CSQ=G|s…
6	86160102	rs1206902099	A	G	175.2	PASS	1	gene=NT5E;AB=0.347826;ABP=7.63648;AO=8;CALLERS=freebayes,gatk-haplotype,platypus,samtools;CIGAR=1X;DPB=23;DPRA=0;EPP=3.0103;EPPR=5.49198;GTI=0;LEN=1;MEANALT=2;MQM=60;MQMR=60;NS=1;NUMALT=1;ODDS=40.3431;PAIRED=1;PAIREDR=1;PAO=0;PQA=0;PQR=0;PRO=0;QA=321;QR=528;RO=14;RPL=5;RPP=4.09604;RPPR=3.63072;RPR=3;RUN=1;SAF=5;SAP=4.09604;SAR=3;SRF=7;SRP=3.0103;SRR=7;TYPE=snp;technology.illumina=1;CSQ=G|structur…
6	86181119	.	C	A	245.5	PASS	1	gene=NT5E;AB=0.433333;ABP=4.16842;AO=13;CALLERS=freebayes,gatk-haplotype,platypus,samtools;CIGAR=1X;DPB=30;DPRA=0;EPP=3.17734;EPPR=4.1599;GTI=0;LEN=1;MEANALT=1;MQM=60;MQMR=60;NS=1;NUMALT=1;ODDS=56.5369;PAIRED=1;PAIREDR=1;PAO=0;PQA=0;PQR=0;PRO=0;QA=440;QR=513;RO=17;RPL=6;RPP=3.17734;RPPR=4.1599;RPR=7;RUN=1;SAF=2;SAP=16.5402;SAR=11;SRF=4;SRP=13.3567;SRR=13;TYPE=snp;technology.illumina=1;CSQ=A|struc…
6	86195033	rs41271617	G	A	899.2	PASS	11	gene=NT5E;AB=0.484848;ABP=3.0761;AO=16;CALLERS=freebayes,gatk-haplotype,platypus,samtools;CIGAR=1X;DPB=33;DPRA=0;EPP=22.5536;EPPR=4.1599;GTI=0;LEN=1;MEANALT=1;MQM=58.0625;MQMR=60;NS=1;NUMALT=1;ODDS=58.5702;PAIRED=1;PAIREDR=1;PAO=0;PQA=0;PQR=0;PRO=0;QA=482;QR=514;RO=17;RPL=6;RPP=5.18177;RPPR=3.13803;RPR=10;RUN=1;SAF=12;SAP=11.6962;SAR=4;SRF=11;SRP=6.20364;SRR=6;TYPE=snp;technology.illumina=1;CSQ=A…
6	86200277	rs72905321	T	A	481.3	PASS	1	gene=NT5E;AB=0.465517;ABP=3.60933;AO=27;CALLERS=freebayes,gatk-haplotype,platypus,samtools;CIGAR=1X;DPB=58;DPRA=0;EPP=3.09072;EPPR=3.64073;GTI=0;LEN=1;MEANALT=1;MQM=57.4074;MQMR=60;NS=1;NUMALT=1;ODDS=110.822;PAIRED=0.925926;PAIREDR=1;PAO=0;PQA=0;PQR=0;PRO=0;QA=807;QR=944;RO=31;RPL=16;RPP=5.02092;RPPR=11.486;RPR=11;RUN=1;SAF=11;SAP=5.02092;SAR=16;SRF=15;SRP=3.08035;SRR=16;TYPE=snp;technology.illum…
13	45912819	rs147579094	C	T	1013.9	PASS	9	gene=TPT1;AB=0.36;ABP=11.5225;AO=18;CALLERS=freebayes,gatk-haplotype,platypus,samtools;CIGAR=1X;DPB=50;DPRA=0;EPP=7.35324;EPPR=4.09604;GTI=0;LEN=1;MEANALT=1;MQM=60;MQMR=60;NS=1;NUMALT=1;ODDS=65.5774;PAIRED=1;PAIREDR=1;PAO=0;PQA=0;PQR=0;PRO=0;QA=562;QR=1004;RO=32;RPL=11;RPP=4.9405;RPPR=4.09604;RPR=7;RUN=1;SAF=13;SAP=10.7311;SAR=5;SRF=20;SRP=7.35324;SRR=12;TYPE=snp;technology.illumina=1;CSQ=T|struc…
13	45913681	.	CCT	C	277.1	PASS	1	gene=TPT1;CALLERS=freebayes,gatk-haplotype,platypus,samtools;DECOMPOSED;LEN=2;NS=1;TYPE=del;CSQ=C|frameshift_variant|HIGH|TPT1|ENSG00000133112|transcript|ENST00000309246|protein_coding|4/5|c.348_349delAG|p.Ala118fs|366/1008|348/567|116/188||,C|frameshift_variant|HIGH|TPT1|ENSG00000133112|transcript|ENST00000379056|protein_coding|3/5|c.246_247delAG|p.Ala84fs|418/1101|246/417|82/138||,C|frameshift_…
13	45914179	.	T	G	66	PASS	1	gene=TPT1;CALLERS=freebayes,samtools;DECOMPOSED;LEN=1;NS=1;TYPE=snp;CSQ=G|structural_interaction_variant|HIGH|TPT1|ENSG00000133112|interaction|1YZ1:A_81-A_134:ENST00000530705|protein_coding|3/6|c.243A>C||||||,G|structural_interaction_variant|HIGH|TPT1|ENSG00000133112|interaction|1YZ1:B_81-B_134:ENST00000530705|protein_coding|3/6|c.243A>C||||||,G|structural_interaction_variant|HIGH|TPT1|ENSG000001…
13	45914870	.	A	G	980.7	PASS	1	gene=TPT1;AB=0.754902;ABP=60.5756;AO=77;CALLERS=freebayes,platypus,samtools;CIGAR=1X;DPB=102;DPRA=0;EPP=3.26411;EPPR=3.10471;GTI=0;LEN=1;MEANALT=3;MQM=44.6623;MQMR=55.8696;NS=1;NUMALT=1;ODDS=19.8407;PAIRED=0.766234;PAIREDR=0.826087;PAO=0;PQA=0;PQR=0;PRO=0;QA=1900;QR=564;RO=23;RPL=4;RPP=137.275;RPPR=3.10471;RPR=73;RUN=1;SAF=42;SAP=4.39215;SAR=35;SRF=11;SRP=3.10471;SRR=12;TYPE=snp;technology.illumi…
9	120475248	rs137853920	G	A	2768.6	PASS	9	gene=TLR4;AB=0.463768;ABP=6.15736;AO=128;CALLERS=freebayes,gatk-haplotype,platypus,samtools;CIGAR=1X;DPB=276;DPRA=0;EPP=16.3106;EPPR=16.2152;GTI=0;LEN=1;MEANALT=1;MQM=59.5156;MQMR=59.6351;NS=1;NUMALT=1;ODDS=637.498;PAIRED=1;PAIREDR=0.993243;PAO=0;PQA=0;PQR=0;PRO=0;QA=4113;QR=4966;RO=148;RPL=65;RPP=3.07816;RPPR=8.87914;RPR=63;RUN=1;SAF=53;SAP=11.2212;SAR=75;SRF=67;SRP=5.88603;SRR=81;TYPE=snp;techn…
10	75830746	rs373744314	T	C	584.8	PASS	2	gene=VCL;AB=0.485714;ABP=3.07234;AO=17;CALLERS=freebayes,gatk-haplotype,platypus,samtools;CIGAR=1X;DPB=35;DPRA=0;EPP=3.13803;EPPR=3.49285;GTI=0;LEN=1;MEANALT=1;MQM=58.1765;MQMR=60;NS=1;NUMALT=1;ODDS=69.7537;PAIRED=1;PAIREDR=1;PAO=0;PQA=0;PQR=0;PRO=0;QA=536;QR=550;RO=18;RPL=5;RPP=9.26925;RPPR=15.074;RPR=12;RUN=1;SAF=14;SAP=18.4661;SAR=3;SRF=14;SRP=15.074;SRR=4;TYPE=snp;technology.illumina=1;CSQ=C|…
10	75832578	rs189242810	C	T	1052.1	PASS	6	gene=VCL;AB=0.410714;ABP=6.88793;AO=23;CALLERS=freebayes,gatk-haplotype,platypus,samtools;CIGAR=1X;DPB=56;DPRA=0;EPP=3.10471;EPPR=4.65535;GTI=0;LEN=1;MEANALT=1;MQM=60;MQMR=60;NS=1;NUMALT=1;ODDS=92.6035;PAIRED=1;PAIREDR=1;PAO=0;PQA=0;PQR=0;PRO=0;QA=718;QR=1101;RO=33;RPL=14;RPP=5.3706;RPPR=3.60252;RPR=9;RUN=1;SAF=4;SAP=24.253;SAR=19;SRF=10;SRP=14.1309;SRR=23;TYPE=snp;technology.illumina=1;CSQ=T|str…
10	75834531	.	C	CAA	143.9	PASS	1	gene=VCL;CALLERS=freebayes,gatk-haplotype,platypus,samtools;DECOMPOSED;LEN=2;NS=1;TYPE=ins;CSQ=CAA|frameshift_variant|HIGH|VCL|ENSG00000035403|transcript|ENST00000211998|protein_coding|6/22|c.658_659dupAA|p.Asn220fs|754/5482|660/3405|220/1134||INFO_REALIGN_3_PRIME,CAA|frameshift_variant|HIGH|VCL|ENSG00000035403|transcript|ENST00000372755|protein_coding|6/21|c.658_659dupAA|p.Asn220fs|754/5286|660/…
17	37825908	rs556631070	G	A	373.1	PASS	1	gene=PNMT;AB=0.5;ABP=3.0103;AO=15;CALLERS=freebayes,gatk-haplotype,platypus,samtools;CIGAR=1X;DPB=30;DPRA=0;EPP=10.1038;EPPR=4.31318;GTI=0;LEN=1;MEANALT=1;MQM=60;MQMR=60;NS=1;NUMALT=1;ODDS=85.9004;PAIRED=0.933333;PAIREDR=1;PAO=0;PQA=0;PQR=0;PRO=0;QA=574;QR=615;RO=15;RPL=7;RPP=3.15506;RPPR=4.31318;RPR=8;RUN=1;SAF=7;SAP=3.15506;SAR=8;SRF=6;SRP=4.31318;SRR=9;TYPE=snp;technology.illumina=1;CSQ=A|stru…
17	37825998	rs72554035	C	T	513.2	PASS	7	gene=PNMT;AB=0.428571;ABP=3.94093;AO=9;CALLERS=freebayes,gatk-haplotype,platypus,samtools;CIGAR=1X;DPB=21;DPRA=0;EPP=3.25157;EPPR=3.73412;GTI=0;LEN=1;MEANALT=1;MQM=60;MQMR=60;NS=1;NUMALT=1;ODDS=32.564;PAIRED=1;PAIREDR=1;PAO=0;PQA=0;PQR=0;PRO=0;QA=278;QR=394;RO=12;RPL=4;RPP=3.25157;RPPR=9.52472;RPR=5;RUN=1;SAF=6;SAP=5.18177;SAR=3;SRF=6;SRP=3.0103;SRR=6;TYPE=snp;technology.illumina=1;CSQ=T|structur…
17	37826013	rs34530498	C	T	126.9	PASS	1	gene=PNMT;AB=0.333333;ABP=10.9724;AO=11;CALLERS=freebayes,gatk-haplotype,platypus,samtools;CIGAR=1X;DPB=33;DPRA=0;EPP=3.20771;EPPR=9.32731;GTI=0;LEN=1;MEANALT=1;MQM=60;MQMR=57.6818;NS=1;NUMALT=1;ODDS=29.2224;PAIRED=1;PAIREDR=0.863636;PAO=0;PQA=0;PQR=0;PRO=0;QA=317;QR=645;RO=22;RPL=7;RPP=4.78696;RPPR=3.0103;RPR=4;RUN=1;SAF=3;SAP=7.94546;SAR=8;SRF=8;SRP=6.56362;SRR=14;TYPE=snp;technology.illumina=1…
17	37826077	rs151192070	T	C	236.2	PASS	1	gene=PNMT;AB=0.407407;ABP=5.02092;AO=11;CALLERS=freebayes,gatk-haplotype,platypus,samtools;CIGAR=1X;DPB=27;DPRA=0;EPP=3.20771;EPPR=5.18177;GTI=0;LEN=1;MEANALT=1;MQM=59.0909;MQMR=60;NS=1;NUMALT=1;ODDS=54.385;PAIRED=1;PAIREDR=1;PAO=0;PQA=0;PQR=0;PRO=0;QA=416;QR=597;RO=16;RPL=7;RPP=4.78696;RPPR=3.55317;RPR=4;RUN=1;SAF=9;SAP=12.6832;SAR=2;SRF=11;SRP=7.89611;SRR=5;TYPE=snp;technology.illumina=1;CSQ=C|…
1	11718797	rs142346784	G	A	1149.1	PASS	9	gene=FBXO44;AB=0.565217;ABP=3.86001;AO=13;CALLERS=freebayes,gatk-haplotype,platypus,samtools;CIGAR=1X;DPB=23;DPRA=0;EPP=3.17734;EPPR=10.8276;GTI=0;LEN=1;MEANALT=1;MQM=60;MQMR=60;NS=1;NUMALT=1;ODDS=43.6778;PAIRED=1;PAIREDR=1;PAO=0;PQA=0;PQR=0;PRO=0;QA=443;QR=348;RO=10;RPL=5;RPP=4.51363;RPPR=6.48466;RPR=8;RUN=1;SAF=7;SAP=3.17734;SAR=6;SRF=5;SRP=3.0103;SRR=5;TYPE=snp;technology.illumina=1;CSQ=A|stru…
6	52843321	rs557844606	GCTT	G	1142.9	PASS	5	gene=GSTA4;CALLERS=freebayes,gatk-haplotype,platypus,samtools;DECOMPOSED;LEN=3;NS=1;TYPE=del;CSQ=G|structural_interaction_variant|HIGH|GSTA4|ENSG00000170899|interaction|1GUL:A_13-A_205:ENST00000370959|protein_coding|7/7|c.613_615delAAG||||||,G|structural_interaction_variant|HIGH|GSTA4|ENSG00000170899|interaction|1GUL:A_17-A_205:ENST00000370959|protein_coding|7/7|c.613_615delAAG||||||,G|structural…
9	32408612	rs41304757	G	A	940.6	PASS	7	gene=ACO1;AB=0.518987;ABP=3.25768;AO=41;CALLERS=freebayes,gatk-haplotype,platypus,samtools;CIGAR=1X;DPB=79;DPRA=0;EPP=7.30028;EPPR=3.9246;GTI=0;LEN=1;MEANALT=1;MQM=58.122;MQMR=58.7105;NS=1;NUMALT=1;ODDS=166.764;PAIRED=0.95122;PAIREDR=1;PAO=0;PQA=0;PQR=0;PRO=0;QA=1291;QR=1151;RO=38;RPL=12;RPP=18.3165;RPPR=3.0103;RPR=29;RUN=1;SAF=27;SAP=11.961;SAR=14;SRF=20;SRP=3.23888;SRR=18;TYPE=snp;technology.il…
9	32418353	rs41305321	C	T	340.1	PASS	1	gene=ACO1;AB=0.405405;ABP=5.88603;AO=15;CALLERS=freebayes,gatk-haplotype,platypus,samtools;CIGAR=1X;DPB=37;DPRA=0;EPP=3.15506;EPPR=3.1137;GTI=0;LEN=1;MEANALT=2;MQM=60;MQMR=60;NS=1;NUMALT=1;ODDS=78.3155;PAIRED=1;PAIREDR=1;PAO=0;PQA=0;PQR=0;PRO=0;QA=553;QR=680;RO=21;RPL=7;RPP=3.15506;RPPR=3.94093;RPR=8;RUN=1;SAF=8;SAP=3.15506;SAR=7;SRF=8;SRP=5.59539;SRR=13;TYPE=snp;technology.illumina=1;CSQ=T|struc…
9	32429499	.	C	T	245	PASS	1	gene=ACO1;AB=0.6;ABP=5.18177;AO=15;CALLERS=freebayes,gatk-haplotype,platypus,samtools;CIGAR=1X;DPB=25;DPRA=0;EPP=6.62942;EPPR=10.8276;GTI=0;LEN=1;MEANALT=1;MQM=60;MQMR=56.9;NS=1;NUMALT=1;ODDS=31.7229;PAIRED=1;PAIREDR=1;PAO=0;PQA=0;PQR=0;PRO=0;QA=446;QR=315;RO=10;RPL=12;RPP=14.7363;RPPR=10.8276;RPR=3;RUN=1;SAF=2;SAP=20.5268;SAR=13;SRF=2;SRP=10.8276;SRR=8;TYPE=snp;technology.illumina=1;CSQ=T|stop_g…
9	32431807	rs1157673817	C	T	2634.7	PASS	1	gene=ACO1;AB=0;ABP=0;AO=96;CALLERS=freebayes,gatk-haplotype,platypus,samtools;CIGAR=1X;DPB=96;DPRA=0;EPP=3.10078;EPPR=0;GTI=0;LEN=1;MEANALT=1;MQM=59.3958;MQMR=0;NS=1;NUMALT=1;ODDS=137.689;PAIRED=0.979167;PAIREDR=0;PAO=0;PQA=0;PQR=0;PRO=0;QA=3040;QR=0;RO=0;RPL=63;RPP=23.3679;RPPR=0;RPR=33;RUN=1;SAF=26;SAP=46.8017;SAR=70;SRF=0;SRP=0;SRR=0;TYPE=snp;technology.illumina=1;CSQ=T|structural_interaction_…
9	32450092	rs112153542	C	T	182	PASS	1	gene=ACO1;AB=0.52381;ABP=3.1137;AO=11;CALLERS=freebayes,gatk-haplotype,platypus,samtools;CIGAR=1X;DPB=21;DPRA=0;EPP=3.20771;EPPR=3.0103;GTI=0;LEN=1;MEANALT=1;MQM=60;MQMR=60;NS=1;NUMALT=1;ODDS=35.7998;PAIRED=1;PAIREDR=1;PAO=0;PQA=0;PQR=0;PRO=0;QA=332;QR=292;RO=10;RPL=9;RPP=12.6832;RPPR=3.0103;RPR=2;RUN=1;SAF=6;SAP=3.20771;SAR=5;SRF=6;SRP=3.87889;SRR=4;TYPE=snp;technology.illumina=1;CSQ=T|structura…
8	6371240	rs149383060	C	G	1443.1	PASS	6	gene=ANGPT2;AB=0.480769;ABP=3.17734;AO=25;CALLERS=freebayes,gatk-haplotype,platypus,samtools;CIGAR=1X;DPB=52;DPRA=0;EPP=7.26639;EPPR=3.73412;GTI=0;LEN=1;MEANALT=1;MQM=60;MQMR=60;NS=1;NUMALT=1;ODDS=122.678;PAIRED=1;PAIREDR=1;PAO=0;PQA=0;PQR=0;PRO=0;QA=843;QR=893;RO=27;RPL=9;RPP=7.26639;RPPR=3.73412;RPR=16;RUN=1;SAF=18;SAP=13.5202;SAR=7;SRF=19;SRP=12.7417;SRR=8;TYPE=snp;technology.illumina=1;CSQ=G|…
7	116340177	rs200074800	G	A	301.6	PASS	1	gene=MET;AB=0.555556;ABP=3.9754;AO=20;CALLERS=freebayes,gatk-haplotype,platypus,samtools;CIGAR=1X;DPB=36;DPRA=0;EPP=6.91895;EPPR=3.15506;GTI=0;LEN=1;MEANALT=2;MQM=58.45;MQMR=57.9333;NS=1;NUMALT=1;ODDS=45.8368;PAIRED=1;PAIREDR=1;PAO=0;PQA=0;PQR=0;PRO=0;QA=515;QR=393;RO=15;RPL=8;RPP=4.74748;RPPR=3.15506;RPR=12;RUN=1;SAF=11;SAP=3.44459;SAR=9;SRF=7;SRP=3.15506;SRR=8;TYPE=snp;technology.illumina=1;CSQ…
7	116371911	.	C	A	155.1	PASS	1	gene=MET;AB=0.37931;ABP=6.67934;AO=11;CALLERS=freebayes,gatk-haplotype,platypus,samtools;CIGAR=1X;DPB=29;DPRA=0;EPP=12.6832;EPPR=3.0103;GTI=0;LEN=1;MEANALT=1;MQM=60;MQMR=58.2778;NS=1;NUMALT=1;ODDS=35.7169;PAIRED=1;PAIREDR=1;PAO=0;PQA=0;PQR=0;PRO=0;QA=333;QR=556;RO=18;RPL=5;RPP=3.20771;RPPR=3.49285;RPR=6;RUN=1;SAF=3;SAP=7.94546;SAR=8;SRF=3;SRP=20.3821;SRR=15;TYPE=snp;technology.illumina=1;CSQ=A|st…
7	116415124	rs370529693	C	T	1217.8	PASS	1	gene=MET;AB=0.535354;ABP=4.08507;AO=53;CALLERS=freebayes,gatk-haplotype,platypus,samtools;CIGAR=1X;DPB=99;DPRA=0;EPP=4.03458;EPPR=3.0103;GTI=0;LEN=1;MEANALT=1;MQM=60;MQMR=60;NS=1;NUMALT=1;ODDS=229.968;PAIRED=1;PAIREDR=1;PAO=0;PQA=0;PQR=0;PRO=0;QA=1750;QR=1522;RO=46;RPL=27;RPP=3.05127;RPPR=12.2627;RPR=26;RUN=1;SAF=27;SAP=3.05127;SAR=26;SRF=17;SRP=9.80795;SRR=29;TYPE=snp;technology.illumina=1;CSQ=T…
7	116436003	.	TG	T	1074.5	PASS	1	gene=MET;CALLERS=freebayes,gatk-haplotype,platypus,samtools;DECOMPOSED;LEN=1;NS=1;TYPE=del;CSQ=T|frameshift_variant|HIGH|MET|ENSG00000105976|transcript|ENST00000318493|protein_coding|21/21|c.4054delG|p.Val1352fs|4241/4632|4054/4227|1352/1408||INFO_REALIGN_3_PRIME,T|frameshift_variant|HIGH|MET|ENSG00000105976|transcript|ENST00000397752|protein_coding|21/21|c.4000delG|p.Val1334fs|4200/6635|4000/417…
10	12006066	.	G	A	418.3	PASS	1	gene=UPF2;AB=0.542857;ABP=3.56868;AO=19;CALLERS=freebayes,gatk-haplotype,platypus,samtools;CIGAR=1X;DPB=35;DPRA=0;EPP=3.12459;EPPR=11.6962;GTI=0;LEN=1;MEANALT=1;MQM=60;MQMR=56.625;NS=1;NUMALT=1;ODDS=76.0733;PAIRED=1;PAIREDR=0.9375;PAO=0;PQA=0;PQR=0;PRO=0;QA=647;QR=554;RO=16;RPL=14;RPP=12.2676;RPPR=5.18177;RPR=5;RUN=1;SAF=8;SAP=4.03889;SAR=11;SRF=8;SRP=3.0103;SRR=8;TYPE=snp;technology.illumina=1;C…
10	12070864	.	T	C	913	PASS	1	gene=UPF2;AB=0.561644;ABP=5.41974;AO=41;CALLERS=freebayes,gatk-haplotype,platypus,samtools;CIGAR=1X;DPB=73;DPRA=0;EPP=4.33437;EPPR=3.28173;GTI=0;LEN=1;MEANALT=1;MQM=60;MQMR=60;NS=1;NUMALT=1;ODDS=140.464;PAIRED=1;PAIREDR=1;PAO=0;PQA=0;PQR=0;PRO=0;QA=1338;QR=996;RO=32;RPL=23;RPP=4.33437;RPPR=9.79615;RPR=18;RUN=1;SAF=28;SAP=14.9269;SAR=13;SRF=20;SRP=7.35324;SRR=12;TYPE=snp;technology.illumina=1;CSQ=…
10	12071235	rs35258162	A	T	1127.8	PASS	2	gene=UPF2;AB=0.470588;ABP=3.26577;AO=16;CALLERS=freebayes,gatk-haplotype,platypus,samtools;CIGAR=1X;DPB=34;DPRA=0;EPP=16.582;EPPR=7.35324;GTI=0;LEN=1;MEANALT=1;MQM=57.3125;MQMR=60;NS=1;NUMALT=1;ODDS=62.3132;PAIRED=1;PAIREDR=1;PAO=0;PQA=0;PQR=0;PRO=0;QA=492;QR=562;RO=18;RPL=7;RPP=3.55317;RPPR=3.0103;RPR=9;RUN=1;SAF=12;SAP=11.6962;SAR=4;SRF=5;SRP=10.7311;SRR=13;TYPE=snp;technology.illumina=1;CSQ=T|…
11	68696783	rs35193202	C	T	700.9	PASS	8	gene=IGHMBP2;AB=0.311111;ABP=16.956;AO=14;CALLERS=freebayes,gatk-haplotype,platypus,samtools;CIGAR=1X;DPB=45;DPRA=0;EPP=3.63072;EPPR=5.61607;GTI=0;LEN=1;MEANALT=2;MQM=57.7857;MQMR=49.1667;NS=1;NUMALT=1;ODDS=24.9375;PAIRED=1;PAIREDR=0.933333;PAO=0;PQA=0;PQR=0;PRO=0;QA=364;QR=821;RO=30;RPL=9;RPP=5.49198;RPPR=5.61607;RPR=5;RUN=1;SAF=13;SAP=25.3454;SAR=1;SRF=14;SRP=3.29983;SRR=16;TYPE=snp;technology.…
3	62257167	.	C	A	567.4	PASS	1	gene=PTPRG;AB=0.511111;ABP=3.05855;AO=23;CALLERS=freebayes,gatk-haplotype,platypus,samtools;CIGAR=1X;DPB=45;DPRA=0;EPP=3.10471;EPPR=3.0103;GTI=0;LEN=1;MEANALT=1;MQM=60;MQMR=60;NS=1;NUMALT=1;ODDS=125.262;PAIRED=0.956522;PAIREDR=1;PAO=0;PQA=0;PQR=0;PRO=0;QA=849;QR=812;RO=22;RPL=11;RPP=3.10471;RPPR=4.58955;RPR=12;RUN=1;SAF=17;SAP=14.4341;SAR=6;SRF=12;SRP=3.40511;SRR=10;TYPE=snp;technology.illumina=1…
3	62257203	.	A	T	387.6	PASS	1	gene=PTPRG;AB=0.642857;ABP=7.97367;AO=18;CALLERS=freebayes,gatk-haplotype,platypus,samtools;CIGAR=1X;DPB=28;DPRA=0;EPP=3.0103;EPPR=3.87889;GTI=0;LEN=1;MEANALT=1;MQM=60;MQMR=60;NS=1;NUMALT=1;ODDS=29.1612;PAIRED=0.888889;PAIREDR=1;PAO=0;PQA=0;PQR=0;PRO=0;QA=591;QR=291;RO=10;RPL=5;RPP=10.7311;RPPR=3.87889;RPR=13;RUN=1;SAF=8;SAP=3.49285;SAR=10;SRF=4;SRP=3.87889;SRR=6;TYPE=snp;technology.illumina=1;CS…
3	62268408	.	TA	T	576.7	PASS	1	gene=PTPRG;CALLERS=freebayes,gatk-haplotype,platypus,samtools;DECOMPOSED;LEN=1;NS=1;TYPE=del;CSQ=T|frameshift_variant|HIGH|PTPRG|ENSG00000144724|transcript|ENST00000474889|protein_coding|28/30|c.3920delA|p.Tyr1307fs|4297/9021|3920/4338|1307/1445||,T|frameshift_variant|HIGH|PTPRG|ENSG00000144724|transcript|ENST00000295874|protein_coding|27/29|c.3833delA|p.Tyr1278fs|4210/4650|3833/4251|1278/1416||,…
3	62268528	rs199914909	A	G	738.1	PASS	2	gene=PTPRG;AB=0.475;ABP=3.44459;AO=38;CALLERS=freebayes,gatk-haplotype,samtools;CIGAR=1X;DPB=80;DPRA=0;EPP=6.66752;EPPR=8.18047;GTI=0;LEN=1;MEANALT=1;MQM=55.9211;MQMR=57.0476;NS=1;NUMALT=1;ODDS=162.669;PAIRED=1;PAIREDR=1;PAO=0;PQA=0;PQR=0;PRO=0;QA=1154;QR=1270;RO=42;RPL=19;RPP=3.0103;RPPR=3.21711;RPR=19;RUN=1;SAF=10;SAP=21.525;SAR=28;SRF=10;SRP=28.0339;SRR=32;TYPE=snp;technology.illumina=1;CSQ=G|…
10	134137877	rs564621303	C	CCTAT	1050.5	PASS	8	gene=STK32C;CALLERS=freebayes,gatk-haplotype,platypus,samtools;DECOMPOSED;LEN=4;NS=1;TYPE=ins;CSQ=CCTAT|splice_acceptor_variant&intron_variant|HIGH|STK32C|ENSG00000165752|transcript|ENST00000368619|protein_coding|1/1|c.395-4_395-1dupATAG||||||WARNING_TRANSCRIPT_NO_START_CODON,CCTAT|intron_variant|MODIFIER|STK32C|ENSG00000165752|transcript|ENST00000368625|protein_coding|1/11|c.301+7059_301+7062dup…
1	162549300	rs983800480	A	C	933.8	PASS	1	gene=UAP1;AB=0.489362;ABP=3.1027;AO=46;CALLERS=freebayes,gatk-haplotype,platypus,samtools;CIGAR=1X;DPB=94;DPRA=0;EPP=7.73089;EPPR=4.6389;GTI=0;LEN=1;MEANALT=1;MQM=59.3261;MQMR=60;NS=1;NUMALT=1;ODDS=215.014;PAIRED=1;PAIREDR=1;PAO=0;PQA=0;PQR=0;PRO=0;QA=1437;QR=1448;RO=48;RPL=19;RPP=6.03148;RPPR=5.9056;RPR=27;RUN=1;SAF=31;SAP=15.095;SAR=15;SRF=31;SRP=11.8771;SRR=17;TYPE=snp;technology.illumina=1;CS…
1	162557419	rs34942806	A	G	694.7	PASS	2	gene=UAP1;AB=0.529412;ABP=3.3935;AO=27;CALLERS=freebayes,gatk-haplotype,platypus,samtools;CIGAR=1X;DPB=51;DPRA=0;EPP=16.6021;EPPR=12.0581;GTI=0;LEN=1;MEANALT=1;MQM=60;MQMR=60;NS=1;NUMALT=1;ODDS=136.944;PAIRED=1;PAIREDR=1;PAO=0;PQA=0;PQR=0;PRO=0;QA=1024;QR=909;RO=24;RPL=11;RPP=5.02092;RPPR=12.0581;RPR=16;RUN=1;SAF=18;SAP=9.52472;SAR=9;SRF=14;SRP=4.45795;SRR=10;TYPE=snp;technology.illumina=1;CSQ=G|…
1	162557431	.	C	T	3110.7	PASS	1	gene=UAP1;AB=0.427653;ABP=17.1493;AO=133;CALLERS=freebayes,gatk-haplotype,platypus,samtools;CIGAR=1X;DPB=311;DPRA=0;EPP=42.2111;EPPR=15.5024;GTI=0;LEN=1;MEANALT=1;MQM=59.2481;MQMR=59.7416;NS=1;NUMALT=1;ODDS=716.261;PAIRED=0.977444;PAIREDR=0.988764;PAO=0;PQA=0;PQR=0;PRO=0;QA=4694;QR=6391;RO=178;RPL=70;RPP=3.81032;RPPR=7.89001;RPR=63;RUN=1;SAF=42;SAP=42.2111;SAR=91;SRF=56;SRP=56.1504;SRR=122;TYPE=s…
1	162560282	rs61747497	C	T	441.8	PASS	1	gene=UAP1;AB=0.525;ABP=3.22745;AO=21;CALLERS=freebayes,gatk-haplotype,platypus,samtools;CIGAR=1X;DPB=40;DPRA=0;EPP=8.07707;EPPR=5.8675;GTI=0;LEN=1;MEANALT=1;MQM=58.5238;MQMR=59.1053;NS=1;NUMALT=1;ODDS=95.1229;PAIRED=0.952381;PAIREDR=0.736842;PAO=0;PQA=0;PQR=0;PRO=0;QA=686;QR=651;RO=19;RPL=10;RPP=3.1137;RPPR=3.12459;RPR=11;RUN=1;SAF=9;SAP=3.94093;SAR=12;SRF=11;SRP=4.03889;SRR=8;TYPE=snp;technology…
6	152265352	rs142712646	C	T	1270.8	PASS	4	gene=ESR1;AB=0.444444;ABP=4.21667;AO=20;CALLERS=freebayes,gatk-haplotype,platypus,samtools;CIGAR=1X;DPB=45;DPRA=0;EPP=13.8677;EPPR=8.80089;GTI=0;LEN=1;MEANALT=2;MQM=58.45;MQMR=58.7083;NS=1;NUMALT=1;ODDS=57.7011;PAIRED=1;PAIREDR=1;PAO=0;PQA=0;PQR=0;PRO=0;QA=495;QR=621;RO=24;RPL=10;RPP=3.0103;RPPR=4.45795;RPR=10;RUN=1;SAF=11;SAP=3.44459;SAR=9;SRF=14;SRP=4.45795;SRR=10;TYPE=snp;technology.illumina=1…
12	13061364	rs527915306	AG	A	766.2	PASS	4	gene=GPRC5A;CALLERS=freebayes,gatk-haplotype,platypus,samtools;DECOMPOSED;LEN=1;NS=1;TYPE=del;CSQ=A|frameshift_variant|HIGH|GPRC5A|ENSG00000013588|transcript|ENST00000014914|protein_coding|2/4|c.183delG|p.Arg61fs|1073/7362|183/1074|61/357||INFO_REALIGN_3_PRIME,A|frameshift_variant|HIGH|GPRC5A|ENSG00000013588|transcript|ENST00000534831|protein_coding|2/2|c.183delG|p.Arg61fs|259/897|183/821|61/272|…
17	64738819	rs34406842	A	G	530.2	PASS	4	gene=PRKCA;AB=0.535714;ABP=3.32051;AO=15;CALLERS=freebayes,gatk-haplotype,platypus,samtools;CIGAR=1X;DPB=28;DPRA=0;EPP=4.31318;EPPR=16.5402;GTI=0;LEN=1;MEANALT=1;MQM=55.3333;MQMR=60;NS=1;NUMALT=1;ODDS=40.2258;PAIRED=0.866667;PAIREDR=1;PAO=0;PQA=0;PQR=0;PRO=0;QA=419;QR=386;RO=13;RPL=11;RPP=10.1038;RPPR=11.1951;RPR=4;RUN=1;SAF=2;SAP=20.5268;SAR=13;SRF=1;SRP=23.2217;SRR=12;TYPE=snp;technology.illumi…
6	7395322	rs114381343	A	G	576.7	PASS	6	gene=RIOK1;AB=0.454545;ABP=3.60252;AO=15;CALLERS=freebayes,gatk-haplotype,platypus,samtools;CIGAR=1X;DPB=33;DPRA=0;EPP=4.31318;EPPR=3.49285;GTI=0;LEN=1;MEANALT=1;MQM=60;MQMR=54.9444;NS=1;NUMALT=1;ODDS=68.9187;PAIRED=1;PAIREDR=0.888889;PAO=0;PQA=0;PQR=0;PRO=0;QA=495;QR=615;RO=18;RPL=7;RPP=3.15506;RPPR=3.49285;RPR=8;RUN=1;SAF=5;SAP=6.62942;SAR=10;SRF=6;SRP=7.35324;SRR=12;TYPE=snp;technology.illumin…
6	7405535	rs200129596	T	G	476.4	PASS	1	gene=RIOK1;AB=0.473684;ABP=3.23888;AO=18;CALLERS=freebayes,gatk-haplotype,platypus,samtools;CIGAR=1X;DPB=38;DPRA=0;EPP=4.9405;EPPR=3.44459;GTI=0;LEN=1;MEANALT=1;MQM=60;MQMR=60;NS=1;NUMALT=1;ODDS=109.705;PAIRED=1;PAIREDR=1;PAO=0;PQA=0;PQR=0;PRO=0;QA=725;QR=825;RO=20;RPL=6;RPP=7.35324;RPPR=3.44459;RPR=12;RUN=1;SAF=13;SAP=10.7311;SAR=5;SRF=10;SRP=3.0103;SRR=10;TYPE=snp;technology.illumina=1;CSQ=G|st…
12	71950407	rs117535164	A	G	645.3	PASS	7	gene=LGR5;AB=0.409091;ABP=7.74806;AO=27;CALLERS=freebayes,gatk-haplotype,platypus,samtools;CIGAR=1X;DPB=66;DPRA=0;EPP=3.09072;EPPR=7.52028;GTI=0;LEN=1;MEANALT=1;MQM=60;MQMR=60;NS=1;NUMALT=1;ODDS=119.253;PAIRED=1;PAIREDR=1;PAO=0;PQA=0;PQR=0;PRO=0;QA=895;QR=1272;RO=39;RPL=11;RPP=5.02092;RPPR=4.40227;RPR=16;RUN=1;SAF=23;SAP=32.0437;SAR=4;SRF=28;SRP=19.1015;SRR=11;TYPE=snp;technology.illumina=1;CSQ=G…
6	161771194	.	C	T	203.4	PASS	1	gene=PARK2;AB=0.451613;ABP=3.64073;AO=14;CALLERS=freebayes,gatk-haplotype,platypus,samtools;CIGAR=1X;DPB=31;DPRA=0;EPP=5.49198;EPPR=3.13803;GTI=0;LEN=1;MEANALT=1;MQM=60;MQMR=60;NS=1;NUMALT=1;ODDS=46.8334;PAIRED=1;PAIREDR=1;PAO=0;PQA=0;PQR=0;PRO=0;QA=389;QR=530;RO=17;RPL=8;RPP=3.63072;RPPR=9.26925;RPR=6;RUN=1;SAF=3;SAP=12.937;SAR=11;SRF=3;SRP=18.4661;SRR=14;TYPE=snp;technology.illumina=1;CSQ=T|sto…
6	162206852	rs34424986	G	A	677.6	PASS	7	gene=PARK2;AB=0.444444;ABP=3.9754;AO=16;CALLERS=freebayes,gatk-haplotype,platypus,samtools;CIGAR=1X;DPB=36;DPRA=0;EPP=3.55317;EPPR=3.44459;GTI=0;LEN=1;MEANALT=1;MQM=60;MQMR=60;NS=1;NUMALT=1;ODDS=77.7521;PAIRED=1;PAIREDR=1;PAO=0;PQA=0;PQR=0;PRO=0;QA=550;QR=719;RO=20;RPL=11;RPP=7.89611;RPPR=3.44459;RPR=5;RUN=1;SAF=6;SAP=5.18177;SAR=10;SRF=4;SRP=18.6449;SRR=16;TYPE=snp;technology.illumina=1;CSQ=A|st…
4	71888145	rs184543423	A	G	1151.3	PASS	5	gene=DCK;AB=0.468468;ABP=3.96888;AO=52;CALLERS=freebayes,gatk-haplotype,platypus,samtools;CIGAR=1X;DPB=111;DPRA=0;EPP=5.68288;EPPR=3.93042;GTI=0;LEN=1;MEANALT=1;MQM=58.8077;MQMR=57.5085;NS=1;NUMALT=1;ODDS=260.485;PAIRED=1;PAIREDR=0.932203;PAO=0;PQA=0;PQR=0;PRO=0;QA=1704;QR=1918;RO=59;RPL=29;RPP=4.51363;RPPR=11.2913;RPR=23;RUN=1;SAF=23;SAP=4.51363;SAR=29;SRF=30;SRP=3.0471;SRR=29;TYPE=snp;technolog…
10	5141619	rs61730879	A	G	1303.4	PASS	15	gene=AKR1C3;AB=0.448276;ABP=5.70592;AO=52;CALLERS=freebayes,gatk-haplotype,platypus,samtools;CIGAR=1X;DPB=116;DPRA=0;EPP=5.68288;EPPR=8.83536;GTI=0;LEN=1;MEANALT=2;MQM=54.9231;MQMR=59.3492;NS=1;NUMALT=1;ODDS=209.371;PAIRED=0.980769;PAIREDR=1;PAO=0;PQA=0;PQR=0;PRO=0;QA=1496;QR=1576;RO=63;RPL=27;RPP=3.17734;RPPR=12.9715;RPR=25;RUN=1;SAF=33;SAP=11.1951;SAR=19;SRF=28;SRP=4.69922;SRR=35;TYPE=snp;techn…
20	39977798	rs559175371	GC	G	901.1	PASS	9	gene=LPIN3;CALLERS=freebayes,gatk-haplotype,platypus;DECOMPOSED;LEN=1;NS=1;TYPE=del;CSQ=G|frameshift_variant|HIGH|LPIN3|ENSG00000132793|transcript|ENST00000373257|protein_coding|5/20|c.631delC|p.Gln211fs|722/4363|631/2556|211/851||INFO_REALIGN_3_PRIME,G|upstream_gene_variant|MODIFIER|LPIN3|ENSG00000132793|transcript|ENST00000445975|protein_coding||c.-3524delC|||||3522|WARNING_TRANSCRIPT_INCOMPLET…
20	39980556	.	C	T	151.6	PASS	1	gene=LPIN3;AB=0.354839;ABP=8.68415;AO=11;CALLERS=freebayes,gatk-haplotype,platypus,samtools;CIGAR=1X;DPB=31;DPRA=0;EPP=3.20771;EPPR=6.91895;GTI=0;LEN=1;MEANALT=1;MQM=60;MQMR=60;NS=1;NUMALT=1;ODDS=34.9056;PAIRED=0.909091;PAIREDR=1;PAO=0;PQA=0;PQR=0;PRO=0;QA=330;QR=645;RO=20;RPL=5;RPP=3.20771;RPPR=4.74748;RPR=6;RUN=1;SAF=4;SAP=4.78696;SAR=7;SRF=11;SRP=3.44459;SRR=9;TYPE=snp;technology.illumina=1;CS…
20	39983351	rs140359632	C	T	424	PASS	2	gene=LPIN3;AB=0.590909;ABP=4.58955;AO=13;CALLERS=freebayes,gatk-haplotype,platypus,samtools;CIGAR=1X;DPB=22;DPRA=0;EPP=3.17734;EPPR=3.25157;GTI=0;LEN=1;MEANALT=1;MQM=52.8462;MQMR=56.5556;NS=1;NUMALT=1;ODDS=19.4021;PAIRED=1;PAIREDR=1;PAO=0;PQA=0;PQR=0;PRO=0;QA=335;QR=234;RO=9;RPL=8;RPP=4.51363;RPPR=5.18177;RPR=5;RUN=1;SAF=2;SAP=16.5402;SAR=11;SRF=1;SRP=14.8328;SRR=8;TYPE=snp;technology.illumina=1;…
