# Supplementary material for: Detection of Rare Germline Variants in the Genomes of B Cell Neoplasms
Source: Preprints.org preprint supplement (doi:10.20944/preprints202101.0330.v1), 2021-01-18
Supplement: Supplementary file 4 [file Supplementary Table 11.xlsx]

## Sheet: Sheet1
ID	P-value	FDR	OR	CLL	Lymphoma
PPIL1	0.287421	0.53812	3.62252	8	1
JAK2	1	1	1.19808	8	3
NT5E	0.144839	0.470726	0.440951	7	7
TPT1	0.00500616	0.0433867	0.163536	3	8
TLR4	0.287421	0.53812	3.62252	8	1
VCL	0.728361	0.86079	1.57587	7	2
PNMT	0.00186107	0.0241939	0.108854	2	8
FBXO44	0.0636013	0.275605	Inf	9	0
GSTA4	0.331151	0.53812	Inf	5	0
ACO1	1	1	1.19808	8	3
ANGPT2	0.184804	0.533877	Inf	6	0
MET	0.316966	0.53812	Inf	4	0
UPF2	0.316966	0.53812	Inf	4	0
IGHMBP2	0.00149833	0.0241939	0.0623864	1	7
PTPRG	0.647565	0.801748	0.670731	3	2
STK32C	1	1	1.34832	6	2
UAP1	0.647565	0.801748	0.670731	3	2
ESR1	0.591487	0.801748	0.446544	2	2
GPRC5A	1	1	1.34623	3	1
PRKCA	0.316966	0.53812	Inf	4	0
RIOK1	0.446068	0.644331	2.70674	6	1
LGR5	0.0322739	0.167824	0.176477	2	5
PARK2	0.446075	0.644331	3.16377	7	1
DCK	0.331151	0.53812	Inf	5	0
AKR1C3	0.00793894	0.0516031	Inf	15	0
LPIN3	0.117359	0.435906	5.01128	11	1
