# Supplementary material for: Detection of Rare Germline Variants in the Genomes of B Cell Neoplasms
Source: Preprints.org preprint supplement (doi:10.20944/preprints202101.0330.v1), 2021-01-18
Supplement: Supplementary file 5 [file Supplementary Table 2.xlsx]

## Sheet: Sheet1
Gene	N. of variants	Known variants	Lilely CHIP
ASXL1	1	1	0
ASXL2	6	2	1
BCOR	1	1	0
BCORL1	3	0	1
CBL	4	1	0
CREBBP	1	1	0
CUX1	7	4	0
DNMT3A	2	1	2
ETV6	1	0	0
EZH2	1	1	0
GNAS	1	0	0
IDH1	2	2	0
IDH2	1	1	0
JAK2	11	11	0
KMT2A	9	3	0
MPL	1	1	0
PPM1D	2	0	1
SETD2	6	2	0
SETDB1	15	14	0
SRSF2	1	0	0
TET2	7	0	5
U2AF1	1	1	0
