# Supplementary material for: Detection of Rare Germline Variants in the Genomes of B Cell Neoplasms
Source: Preprints.org preprint supplement (doi:10.20944/preprints202101.0330.v1), 2021-01-18
Supplement: Supplementary file 6 [file Supplementary Table 3.xlsx]

## Sheet: Sheet1
CHROM	POS	ID	REF	ALT	QUAL	FILTER	N_CASES	CASE_ID	TYPE	GENE	ExonicFunc.refGene
1	32741626	.	CT	C	475.7	PASS	1	4182605	1	LCK	frameshift deletion
1	190067180	.	TTG	T	634.2	PASS	1	898	1	BRINP3	frameshift deletion
3	121248569	.	CA	C	260.2	PASS	1	4138527	1	POLQ	frameshift deletion
4	40103992	.	CAAGT	C	1411.1	PASS	1	1535	1	N4BP2	frameshift deletion
4	187541319	.	AT	A	376.6	PASS	1	4124188	1	FAT1	frameshift deletion
6	43581878	.	CCT	C	3332.2	PASS	2	070;504	1,1	POLH	frameshift deletion
6	87965943	.	GAGAA	G	176.5	PASS	1	25	1	ZNF292	frameshift deletion
6	152774686	rs547705798	AG	A	674.3	PASS	3	1198;4119027;4178655	1,1,1	SYNE1	frameshift deletion
6	167417243	.	CTTCAGTTTTT	C	558.6	PASS	1	596	1	FGFR1OP	frameshift deletion
7	91630255	.	GA	G	306.9	PASS	1	4138464	1	AKAP9	frameshift deletion
7	91708791	.	GA	G	943.8	PASS	1	800	1	AKAP9	frameshift deletion
7	92404108	.	CTCTG	C	246.8	PASS	1	1386	1	CDK6	frameshift deletion
7	116436003	.	TG	T	1074.5	PASS	1	854	1	MET	frameshift deletion
8	117866558	.	AC	A	330.6	PASS	1	1380	1	RAD21	frameshift deletion
10	28900272	.	TAAAC	T	205.8	PASS	1	4177406	1	WAC	frameshift deletion
10	96829148	rs1207535747	AAAAGG	A	221.6	PASS	1	1353	1	CYP2C8	frameshift deletion
11	108115566	.	CT	C	281.2	PASS	1	1078	1	ATM	frameshift deletion
11	108205787	rs1064793406	TAA	T	261.9	PASS	1	188	1	ATM	frameshift deletion
11	108236070	.	CAACAAAGTAGCTGAACGTGTCTTAATGA	C	191.4	PASS	1	1416	1	ATM	frameshift deletion
12	406289	.	CT	C	1311.9	PASS	1	12	1	KDM5A	frameshift deletion
12	46298141	.	TG	T	517	PASS	1	4107990	1	ARID2	frameshift deletion
13	32907111	rs397507591	AG	A	233.4	PASS	1	4140544	1	BRCA2	frameshift deletion
14	93299492	.	GCAGT	G	1710.3	PASS	1	881	1	GOLGA5	frameshift deletion
19	1615732	.	GT	G	462.5	PASS	1	1446	1	TCF3	frameshift deletion
19	9057564	.	CT	C	907.9	PASS	1	266	1	MUC16	frameshift deletion
19	9064630	.	TG	T	2264.8	PASS	2	885;824	1,1	MUC16	frameshift deletion
19	9087935	.	TTG	T	981.3	PASS	1	114	1	MUC16	frameshift deletion
1	150917623	rs587715611;rs755041728;rs587751384	TG	T,TGG	730.7	PASS	5	1346;150;658;762;868	1,1,1,1,1	SETDB1	frameshift insertion
2	29416170	rs370701220	C	CT	133.7	PASS	1	188	1	ALK	frameshift insertion
3	30713698	.	C	CA	1395.7	PASS	1	588	1	TGFBR2	frameshift insertion
3	121206336	.	C	CTGTA	405.1	PASS	1	4160468	1	POLQ	frameshift insertion
9	117826953	.	G	GT	104.2	PASS	1	4178310	1	TNC	frameshift insertion
9	134072879	.	G	GT	277	PASS	1	1491	1	NUP214	frameshift insertion
12	1553736	.	G	GC	634.5	PASS	1	1452	1	ERC1	frameshift insertion
17	59761413	rs878855150	C	CTTTG	212.1	PASS	1	4177601	1	BRIP1	frameshift insertion
17	79967904	rs556931297	G	GC	451	PASS	3	4105105;4175941;4194891	1,1,1	ASPSCR1	frameshift insertion
18	56205373	rs561573547	T	TG	211.4	PASS	2	002;244	1,1	ALPK2	frameshift insertion
19	9067923	.	G	GT	104.7	PASS	1	17	1	MUC16	frameshift insertion
19	10935776	.	A	AC	234.6	PASS	1	1	1	DNM2	frameshift insertion
20	35533855	.	G	GC	190.4	PASS	1	1239	1	SAMHD1	frameshift insertion
22	19171074	rs527763206;rs375471950	C	CT	1181.8	PASS	2	362;4124795	1,1	CLTCL1	frameshift insertion
1	110888159	.	A	T	2033.4	PASS	1	124	1	RBM15	splice_acceptor
2	215661842	rs879254139	C	A	415.5	PASS	1	4160069	1	BARD1	splice_acceptor
11	92573727	.	G	A	1205.4	PASS	1	351	1	FAT3	splice_acceptor
11	108141789	rs1060501703	A	G	154	PASS	1	155	1	ATM	splice_acceptor
12	56493615	rs566285257	GAT	G	562.3	PASS	1	756	1	ERBB3	splice_acceptor
19	9038416	.	C	A	1360	PASS	1	110	1	MUC16	splice_acceptor
1	179079416	rs56004467	C	T	2368.6	PASS	1	812	1	ABL2	splice_donor
2	216184456	.	T	C	931.5	PASS	1	778	1	ATIC	splice_donor
3	121240849	.	C	A	214.6	PASS	1	1360	1	POLQ	splice_donor
5	158526589	.	AC	A	227.6	PASS	1	4190316	1	EBF1	splice_donor
8	30922580	.	G	A	1620.9	PASS	1	156	1	WRN	splice_donor
8	118831914	.	C	G	325.1	PASS	1	1195	1	EXT1	splice_donor
12	57863483	.	T	C	640.3	PASS	1	4179976	1	GLI1	splice_donor
12	122825299	rs144240398	C	A	200.3	PASS	1	83	1	CLIP1	splice_donor
14	69262791	.	C	A	413.6	PASS	1	4158769	1	ZFP36L1	splice_donor
17	63049619	.	C	A	328.3	PASS	1	4135278	1	GNA13	splice_donor
19	10247750	rs1013461054	A	T	307.6	PASS	1	4186812	1	DNMT1	splice_donor
21	42842574	.	C	T	444.2	PASS	1	4107990	1	TMPRSS2	splice_donor
22	35478663	rs149896833	G	A	437.2	PASS	3	1426, 1525, 398	1,1,1	ISX	splice_donor
6	128718818	rs199678395	T	C	1115.7	PASS	2	1587;4182393	1,1	PTPRK	startloss
1	156844733	.	C	A	540.9	PASS	1	4176046	1	NTRK1	stopgain
1	157557721	rs145588032	G	A	544.6	PASS	1	4199714	1	FCRL4	stopgain
2	48033741	.	A	T	545.5	PASS	1	4109808	1	MSH6	stopgain
3	53764570	.	A	T	644.5	PASS	1	4171586	1	CACNA1D	stopgain
3	121155022	.	G	T	1238.9	PASS	1	580	1	POLQ	stopgain
3	195481129	rs144662307	C	A	735	PASS	4	1237;284;762;084	1,1,1,1	MUC4	stopgain
3	195498672	rs1395586960	G	A	943.6	PASS	1	305	1	MUC4	stopgain
4	25664173	.	C	A	267.5	PASS	1	4121621	1	SLC34A2	stopgain
4	106157472	.	T	A	391.2	PASS	1	4197438	1	TET2	stopgain
4	135121247	.	G	A	2052.2	PASS	1	1271	1	PABPC4L	stopgain
6	117686297	rs1302519741	TTAAATAAGGCA	T	75	PASS	1	1271	1	ROS1	stopgain
7	66459273	rs120074160	T	A	268	PASS	1	4199714	1	SBDS	stopgain
7	91641932	.	C	T	1936.1	PASS	1	387	1	AKAP9	stopgain
8	30948355	.	G	T	314.1	PASS	1	4108588	1	WRN	stopgain
8	93017346	rs200143453	G	A	1635.2	PASS	2	070;1465	1,1	RUNX1T1	stopgain
8	145738323	rs1406641581	G	A	598.1	PASS	1	150	1	RECQL4	stopgain
9	136031455	.	G	A	404.9	PASS	1	4141476	1	RALGDS	stopgain
10	32306230	.	G	A	676.9	PASS	1	4163639	1	KIF5B	stopgain
10	114220336	.	G	T	575.7	PASS	2	753;753	1,1	VTI1A	stopgain
11	85726006	rs779752380	C	T	184.5	PASS	1	326	1	PICALM	stopgain
11	108106417	.	C	T	488.4	PASS	1	4110120	1	ATM	stopgain
12	57112947	rs746403095	G	T	225.9	PASS	1	1535	1	NACA	stopgain
12	57864923	.	C	G	2587.2	PASS	1	1309	2	GLI1	stopgain
12	65445246	.	G	T	510.6	PASS	1	862	1	WIF1	stopgain
14	45667921	rs144567652	C	T	753.3	PASS	3	1326;558;4133863	1,1,1	FANCM	stopgain
14	69262951	.	G	A	918.7	PASS	1	1103	1	ZFP36L1	stopgain
14	81562992	.	C	A	382.8	PASS	1	4163297	1	TSHR	stopgain
14	81610339	.	C	G	579	PASS	1	1047	1	TSHR	stopgain
14	102552634	.	G	A	446.7	PASS	1	4146301	1	HSP90AA1	stopgain
16	2096239	rs150766139	G	A	2252.3	PASS	2	345;4119463	1,1	NTHL1	stopgain
17	37687472	.	G	A	404.8	PASS	1	4190929	1	CDK12	stopgain
18	56414962	.	C	G	274.9	PASS	1	4183136	1	MALT1	stopgain
19	9057667	.	G	A	5806.7	PASS	1	15	1	MUC16	stopgain
19	14627718	.	G	A	1545.3	PASS	1	709	1	DNAJB1	stopgain
19	33372856	rs45470694	C	A	532.2	PASS	1	4179976	1	CEP89	stopgain
20	35539670	.	A	C	2541.7	PASS	1	188	1	SAMHD1	stopgain
20	62164907	rs553979804	G	A	1259.2	PASS	1	350	1	PTK6	stopgain
22	35478513	.	G	T	721.6	PASS	1	4110498	1	ISX	stopgain
X	153599586	.	G	A	317.7	PASS	1	1386	1	FLNA	stopgain
X	153629244	rs782769153	C	G	537	PASS	1	4148261	1	RPL10	stopgain
17	56770161	rs377297129	T	G	479	PASS	1	4176046	1	RAD51C	stoploss
17	78348466	.	ATGATGCAGGGTGATGGACCAC	A	214.3	PASS	1	4164330	1	RNF213	stoploss
