# Supplementary material for: Detection of Rare Germline Variants in the Genomes of B Cell Neoplasms
Source: Preprints.org preprint supplement (doi:10.20944/preprints202101.0330.v1), 2021-01-18
Supplement: Supplementary file 7 [file Supplementary Table 4.xlsx]

## Sheet: Sheet1
CHROM	POS	ID	REF	ALT	N_CASES	GENE	ExonicFunc.refGene	COSMIC_ID	COSMIC_DIS
1	11297958	rs566273004	C	T	1	MTOR	nonsynonymous SNV	COSM1294735	1(urinary_tract)
1	15844763	rs535165327	G	A	1	CASP9	nonsynonymous SNV	COSM243493	1(prostate)
1	16255086	rs181758065	G	A	1	SPEN	nonsynonymous SNV	COSM1335786	1(large_intestine)
1	16257159	rs141407539	G	A	1	SPEN	nonsynonymous SNV	COSM3740792	1(liver)
1	27106106	rs41303631	G	A	3	ARID1A	nonsynonymous SNV	COSM5020791	1(soft_tissue);1(skin)
1	47717556	.	C	T	1	STIL	nonsynonymous SNV	COSM5010544	1(kidney)
1	47748129	rs149185431	G	A	6	STIL	nonsynonymous SNV	COSM5020753	1(soft_tissue)
1	120459251	rs143236410	G	T	3	NOTCH2	nonsynonymous SNV	COSM1581340	1(haematopoietic_and_lymphoid_tissue);1(pancreas)
1	147096153	rs113081863	G	A	1	BCL9	nonsynonymous SNV	COSM1235637	1(haematopoietic_and_lymphoid_tissue)
1	150917623	rs587715611;rs755041728;rs587751384	TG	T,TGG	5	SETDB1	frameshift insertion	COSM5348791	1(liver)
1	162724631	rs371333028	C	T	1	DDR2	nonsynonymous SNV	COSM3689105;COSM3689104	1(large_intestine)
1	186308826	.	G	T	1	TPR	nonsynonymous SNV	COSM247960	1(prostate)
1	186316510	rs201054576	C	T	1	TPR	nonsynonymous SNV	COSM2123090	1(large_intestine)
1	204518437	rs201947927	C	T	3	MDM4	nonsynonymous SNV	COSM23543	1(liver);2(skin);1(upper_aerodigestive_tract)
1	205632155	rs142713511	G	A	1	SLC45A3	nonsynonymous SNV	COSM902823	1(endometrium)
2	25466800	rs144689354	G	A	1	DNMT3A	nonsynonymous SNV	COSM87012;COSM1407108	13(haematopoietic_and_lymphoid_tissue);1(skin)
2	100170775	rs151104269	C	T	2	AFF3	nonsynonymous SNV	COSM5649364	1(oesophagus)
2	109379847	rs549497956	C	T	2	RANBP2	nonsynonymous SNV	COSM200820	1(salivary_gland)
2	141113994	rs138237325	G	A	3	LRP1B	nonsynonymous SNV	COSM3732921	1(stomach)
2	141291694	rs527342957	C	T	1	LRP1B	nonsynonymous SNV	COSM221422	1(haematopoietic_and_lymphoid_tissue);1(oesophagus);1(skin);1(large_intestine)
2	141598583	rs199519370	G	A	1	LRP1B	nonsynonymous SNV	COSM441184	1(breast);1(stomach);1(pancreas);1(oesophagus)
2	141739813	rs143670199	C	T	1	LRP1B	nonsynonymous SNV	COSM3117523	1(skin)
2	178096406	rs141363120	G	A	4	NFE2L2	nonsynonymous SNV	COSM5019708	1(soft_tissue)
2	189855743	rs112185887	G	A	1	COL3A1	nonsynonymous SNV	COSM139426;COSM3575355	3(skin)
2	190660586	rs61756360	C	T	1	PMS1	nonsynonymous SNV	COSM4583036	1(bone)
2	190742010	rs142159998	C	T	3	PMS1	nonsynonymous SNV	COSM5861358	1(NS);1(large_intestine)
2	209116182	rs142923780	A	C	1	IDH1	nonsynonymous SNV	COSM1581043	1(haematopoietic_and_lymphoid_tissue)
2	232889039	rs202059499	C	T	2	DIS3L2	nonsynonymous SNV	COSM4636699;COSM4636698;COSM4636700;COSM4636697	1(large_intestine)
3	10107089	rs146509445	C	T	1	FANCD2	nonsynonymous SNV	COSM1580876;COSM1580877	1(haematopoietic_and_lymphoid_tissue)
3	13661319	rs200141144	G	A	1	FBLN2	nonsynonymous SNV	COSM3427124;COSM3427125	1(large_intestine)
3	13672274	rs201224373	G	A	1	FBLN2	nonsynonymous SNV	COSM1038940;COSM1038941	1(oesophagus);1(endometrium)
3	30713834	rs35766612	G	A	4	TGFBR2	nonsynonymous SNV	COSM5019392;COSM5019391	2(soft_tissue)
3	47079245	rs76132393	T	C	1	SETD2	nonsynonymous SNV	COSM1581651;COSM1581650	1(haematopoietic_and_lymphoid_tissue)
3	50289947	rs183955200	G	A	1	GNAI2	nonsynonymous SNV	COSM1046441	1(endometrium)
3	70008500	.	C	T	2	MITF	nonsynonymous SNV	COSM4807147;COSM4807148;COSM4807149;COSM4807146	1(haematopoietic_and_lymphoid_tissue);1(pancreas)
3	77684116	rs62250276	C	T	1	ROBO2	nonsynonymous SNV	COSM5125353	1(large_intestine)
3	138453640	rs148366420	G	A	1	PIK3CB	nonsynonymous SNV	COSM1039063	1(endometrium)
3	154860085	rs200791566	G	A	1	MME	nonsynonymous SNV	COSM207009	1(skin)
3	168802737	rs201825977	G	A	1	MECOM	nonsynonymous SNV	COSM4115102;COSM4115101	1(stomach)
3	168834305	rs145677287	T	G	1	MECOM	nonsynonymous SNV	COSM1236077	1(haematopoietic_and_lymphoid_tissue)
3	187446313	rs137878288	G	A	1	BCL6	nonsynonymous SNV	COSM3591104	1(skin)
3	187449515	rs372779365	C	T	1	BCL6	nonsynonymous SNV	COSM1042459	1(endometrium)
3	187449516	rs551620719	G	A	1	BCL6	nonsynonymous SNV	COSM3332950	1(haematopoietic_and_lymphoid_tissue)
3	188327019	rs149437411	C	T	6	LPP	nonsynonymous SNV	COSM1213638	1(large_intestine)
3	192517304	rs1472341110	A	G	1	MB21D2	nonsynonymous SNV	COSM4116093	1(stomach)
4	1806131	rs17881656	T	C	10	FGFR3	nonsynonymous SNV	COSM6166952;COSM724	1(haematopoietic_and_lymphoid_tissue);2(urinary_tract);1(skin);1(lung)
4	54880005	rs1184296732	T	C	1	CHIC2	nonsynonymous SNV	COSM1201052	1(large_intestine)
4	55961103	rs140041720	C	T	1	KDR	nonsynonymous SNV	COSM3780305	1(pancreas);2(large_intestine)
4	55964925	rs149745504	G	A	3	KDR	nonsynonymous SNV	COSM94566	1(lung)
4	55972029	rs55716939	C	T	2	KDR	nonsynonymous SNV	COSM4125180	1(stomach)
4	55984888	rs201719457	C	T	3	KDR	nonsynonymous SNV	COSM3428557	1(soft_tissue);1(skin);1(large_intestine)
4	87622436	.	C	T	1	PTPN13	nonsynonymous SNV	COSM735427	1(lung)
4	87732228	rs61730643	G	T	1	PTPN13	nonsynonymous SNV	COSM5711936	1(large_intestine)
4	106164071	.	C	T	1	TET2	nonsynonymous SNV	COSM4383907	1(haematopoietic_and_lymphoid_tissue)
4	126329821	rs139716832	A	G	1	FAT4	nonsynonymous SNV	COSM5989822;COSM5989823;COSM5989824	1(haematopoietic_and_lymphoid_tissue)
4	126412333	rs138173652	G	A	3	FAT4	nonsynonymous SNV	COSM3009859;COSM3009860	1(prostate);1(large_intestine)
4	187517711	.	C	A	1	FAT1	nonsynonymous SNV	COSM5517609;COSM5517610	1(biliary_tract)
4	187531074	rs199989457	C	T	1	FAT1	nonsynonymous SNV	COSM3131488;COSM3131489	1(large_intestine)
4	187539653	rs201751862	G	A	1	FAT1	nonsynonymous SNV	COSM4683505;COSM4683506	1(large_intestine)
4	187557782	rs200252550	G	A	1	FAT1	nonsynonymous SNV	COSM1729882;COSM1729883	2(haematopoietic_and_lymphoid_tissue);1(liver)
4	187628853	rs370215067	T	C	2	FAT1	nonsynonymous SNV	COSM3392822;COSM3392823	1(pancreas)
5	35876106	.	C	T	1	IL7R	nonsynonymous SNV	COSM1695580	3(skin)
5	55250787	rs140433866	G	C	1	IL6ST	nonsynonymous SNV	COSM6005549	1(prostate)
5	98216872	rs567874073	T	C	1	CHD1	nonsynonymous SNV	COSM4799699	2(liver)
5	112102960	rs139196838	C	T	1	APC	nonsynonymous SNV	COSM248836	1(pancreas);1(large_intestine)
5	112174677	rs143638171	T	C	7	APC	nonsynonymous SNV	COSM30751	1(large_intestine)
5	112174802	rs201830995	C	T	2	APC	nonsynonymous SNV	COSM1580515	1(stomach);1(haematopoietic_and_lymphoid_tissue)
6	26056240	rs547786942	C	G	1	HIST1H1C	nonsynonymous SNV	COSM4885402	1(upper_aerodigestive_tract)
6	27107158	.	G	A	1	HIST1H4I	nonsynonymous SNV	COSM87505	1(pancreas)
6	37138956	.	G	A	1	PIM1	nonsynonymous SNV	COSM4610153	1(haematopoietic_and_lymphoid_tissue)
6	37139030	rs35760989	G	C	5	PIM1	nonsynonymous SNV	COSM5020785	1(soft_tissue)
6	87967393	rs572597069	G	A	1	ZNF292	nonsynonymous SNV	COSM1233829;COSM1233828	1(large_intestine)
6	93955064	rs151105732	G	A	1	EPHA7	nonsynonymous SNV	COSM5431599;COSM5431600	1(oesophagus)
6	117631302	rs138376257	G	A	1	ROS1	nonsynonymous SNV	COSM227020;COSM227019;COSM5595249	3(skin)
6	117715381	rs56274823	A	G	6	ROS1	nonsynonymous SNV	COSM3697472;COSM3697473	1(large_intestine)
6	152265352	rs142712646	C	T	4	ESR1	nonsynonymous SNV	COSM4969495;COSM4969496	2(central_nervous_system)
6	152454556	rs139834542	A	G	3	SYNE1	nonsynonymous SNV	COSM6049997;COSM6049993;COSM6049996;COSM6049994;COSM6049995	1(large_intestine)
6	152527476	rs200236760	G	A	1	SYNE1	nonsynonymous SNV	COSM1441296;COSM1441297;COSM3410671;COSM3410672;COSM1441295	1(central_nervous_system)
6	159191861	rs374945393	C	T	1	EZR	nonsynonymous SNV	COSM4885375	1(upper_aerodigestive_tract)
7	6038824	rs374704824	C	T	1	PMS2	nonsynonymous SNV	COSM3084735	1(upper_aerodigestive_tract)
7	42007201	rs62622373	T	C	4	GLI3	nonsynonymous SNV	COSM5020313	1(soft_tissue)
7	55259442	.	G	A	1	EGFR	nonsynonymous SNV	COSM20896	2(lung);1(thyroid)
7	91727479	rs139046510	A	T	2	AKAP9	nonsynonymous SNV	COSM6050031;COSM6050030	1(large_intestine)
7	98601827	rs201183421	G	A	1	TRRAP	nonsynonymous SNV	COSM1230624;COSM1230623	1(large_intestine)
7	116340177	rs200074800	G	A	1	MET	nonsynonymous SNV	COSM4644770	1(large_intestine)
7	128829039	rs570242755	G	GGCT	1	SMO	nonframeshift insertion	COSM1169629	2(stomach)
7	138522877	rs946825291	G	A	1	KIAA1549	nonsynonymous SNV	COSM4962816	1(pancreas)
7	140439694	.	C	T	1	BRAF	nonsynonymous SNV	COSM26447	1(stomach);1(endometrium)
7	148515137	rs1441187386	G	A	1	EZH2	nonsynonymous SNV	COSM1205909;COSM1205908	1(skin);1(large_intestine)
7	151859914	rs546643392	G	A	1	KMT2C	nonsynonymous SNV	COSM4384307;COSM4384308	1(haematopoietic_and_lymphoid_tissue)
8	1824809	rs144004435	C	T	1	ARHGEF10	nonsynonymous SNV	COSM5091266;COSM50657;COSM1455888	2(large_intestine)
8	1876804	rs35925274	C	T	1	ARHGEF10	nonsynonymous SNV	COSM6039099;COSM6039100	1(large_intestine)
8	17804695	rs140481840	G	A	1	PCM1	nonsynonymous SNV	COSM2873451	1(haematopoietic_and_lymphoid_tissue)
8	30948045	rs150148567	A	G	1	WRN	nonsynonymous SNV	COSM1496821	1(kidney)
8	41548021	rs113948846	G	A	4	ANK1	nonsynonymous SNV	COSM1099865;COSM1597715	1(endometrium)
8	41552202	rs368279119	C	T	1	ANK1	nonsynonymous SNV	COSM4962766;COSM4962767	1(pancreas)
8	41798556	rs200762586	C	T	3	KAT6A	nonsynonymous SNV	COSM1099935	1(stomach);1(endometrium)
8	42823322	rs139710426	G	A	2	HOOK3	nonsynonymous SNV	COSM1285416	1(autonomic_ganglia)
8	52469407	rs777981874	C	G	1	PXDNL	nonsynonymous SNV	COSM6113711	1(lung)
8	68992692	rs529924687	G	A	1	PREX2	nonsynonymous SNV	COSM1101284;COSM1101283	1(stomach);1(oesophagus);1(skin);2(large_intestine);1(endometrium)
8	71036267	.	C	T	1	NCOA2	nonsynonymous SNV	COSM1314178	1(urinary_tract)
8	113364697	rs139786530	T	C	3	CSMD3	nonsynonymous SNV	COSM6111842;COSM6111843	1(lung)
8	128750527	rs146505192	T	C	3	MYC	nonsynonymous SNV	COSM3358205;COSM3358206	2(haematopoietic_and_lymphoid_tissue)
8	145737123	rs35346077	G	A	2	RECQL4	nonsynonymous SNV	COSM3698976	1(large_intestine)
9	399200	.	C	G	1	DOCK8	nonsynonymous SNV	COSM2152092;COSM2152091	2(central_nervous_system)
9	2056721	.	C	T	1	SMARCA2	nonsynonymous SNV	COSM5569924;COSM5569923	1(prostate)
9	5126715	rs142269166	A	G	11	JAK2	nonsynonymous SNV	COSM33708	2(haematopoietic_and_lymphoid_tissue)
9	8484269	.	C	A	1	PTPRD	nonsynonymous SNV	COSM754049;COSM1151349;COSM4861583;COSM1151348;COSM1648174	1(lung)
9	8500886	.	G	A	1	PTPRD	nonsynonymous SNV	COSM3658990;COSM3658991	2(NS);2(skin)
9	98212185	rs113663584	C	T	3	PTCH1	nonsynonymous SNV	COSM17477	1(skin)
9	98231239	rs570441437	G	A	1	PTCH1	nonsynonymous SNV	COSM327220;COSM327219;COSM327221;COSM327222	1(haematopoietic_and_lymphoid_tissue);1(large_intestine)
9	133738340	rs34549764	A	G	4	ABL1	nonsynonymous SNV	COSM6005485	2(NS)
9	133760790	rs367600262	C	T	1	ABL1	nonsynonymous SNV	COSM4658545;COSM4658547;COSM4658546	1(large_intestine)
9	134008519	.	T	C	1	NUP214	nonsynonymous SNV	COSM5093109;COSM1460590	1(large_intestine)
9	139401234	rs182330532	G	A	1	NOTCH1	nonsynonymous SNV	COSM99653;COSM99654	1(upper_aerodigestive_tract)
9	139405111	rs201620358	G	A	5	NOTCH1	nonsynonymous SNV	COSM3724370;COSM3724369	1(haematopoietic_and_lymphoid_tissue);1(soft_tissue);1(kidney);2(upper_aerodigestive_tract)
9	139820309	rs142412558	G	A	1	TRAF2	nonsynonymous SNV	COSM3905898;COSM3905899	1(stomach)
10	31812927	rs143370284	A	C	2	ZEB1	nonsynonymous SNV	COSM5574244;COSM5574245	1(haematopoietic_and_lymphoid_tissue)
10	32306230	.	G	A	1	KIF5B	stopgain	COSM1212486;COSM4439761	1(oesophagus);1(large_intestine)
10	61552762	rs575393361	C	CGGAGGT	2	CCDC6	nonframeshift insertion	COSM4573685	1(bone);1(soft_tissue)
10	70451518	.	G	A	1	TET1	nonsynonymous SNV	COSM327331	2(haematopoietic_and_lymphoid_tissue);1(lung)
10	72357817	rs768505698	C	T	1	PRF1	nonsynonymous SNV	COSM2160494	1(upper_aerodigestive_tract)
10	104353782	rs1403040084	G	A	1	SUFU	nonsynonymous SNV	COSM4730796	1(large_intestine)
10	123263356	.	C	T	1	FGFR2	nonsynonymous SNV	COSM5682718;COSM5682715;COSM5682717;COSM5682716;COSM5682719	1(lung)
11	3060432	rs558009289	C	T	2	CARS	nonsynonymous SNV	COSM1199596;COSM1199595	1(large_intestine)
11	3716782	rs144659895	C	T	2	NUP98	nonsynonymous SNV	COSM3967487;COSM3967486	1(central_nervous_system)
11	57561543	rs76817459	A	G	2	CTNND1	nonsynonymous SNV	COSM3383603;COSM3383602	1(pancreas)
11	57573934	rs200943999	T	G	1	CTNND1	nonsynonymous SNV	COSM3687393	1(large_intestine)
11	71148959	rs565893436	C	T	1	DHCR7	nonsynonymous SNV	COSM3452903;COSM3452902	5(skin);1(large_intestine)
11	71715733	rs35681270	G	A	1	NUMA1	nonsynonymous SNV	COSM5641086;COSM5641085	1(oesophagus)
11	92533495	rs149993900	G	A	2	FAT3	nonsynonymous SNV	COSM4037557;COSM4037556	1(stomach)
11	92533558	rs200944979	G	A	1	FAT3	nonsynonymous SNV	COSM4758814;COSM4758813	1(stomach)
11	92569867	rs200404766	C	T	3	FAT3	nonsynonymous SNV	COSM4037590;COSM4037591	1(haematopoietic_and_lymphoid_tissue);1(stomach);1(large_intestine)
11	92577352	rs200032318	G	A	5	FAT3	nonsynonymous SNV	COSM1717646;COSM1717647;COSM1717648	3(haematopoietic_and_lymphoid_tissue)
11	92616305	rs1440801357	C	T	1	FAT3	nonsynonymous SNV	COSM5655296;COSM5655297;COSM5655295	2(haematopoietic_and_lymphoid_tissue)
11	96074983	rs200971316	C	G	4	MAML2	nonsynonymous SNV	COSM4654588	1(large_intestine)
11	108119823	rs56128736	T	C	10	ATM	nonsynonymous SNV	COSM21825	3(NS);3(haematopoietic_and_lymphoid_tissue)
11	108160480	rs138327406	T	G	1	ATM	nonsynonymous SNV	COSM5020989;COSM5020988	1(soft_tissue)
11	108186610	rs11212587	G	A	4	ATM	nonsynonymous SNV	COSM24635	2(haematopoietic_and_lymphoid_tissue)
11	128359269	rs79963544	C	T	8	ETS1	nonsynonymous SNV	COSM1492496;COSM310945	1(kidney);1(lung)
12	4385357	.	G	A	1	CCND2	nonsynonymous SNV	COSM5551557	1(prostate)
12	12871180	rs546234840	A	G	1	CDKN1B	nonsynonymous SNV	COSM2227662	1(upper_aerodigestive_tract)
12	49425230	rs199797812	G	A	1	KMT2D	nonsynonymous SNV	COSM1361974;COSM1361975	2(upper_aerodigestive_tract);1(large_intestine)
12	50036051	.	C	T	1	PRPF40B	nonsynonymous SNV	COSM241263	1(prostate)
12	51203291	rs146613889	G	A	1	ATF1	nonsynonymous SNV	COSM5005260	1(haematopoietic_and_lymphoid_tissue)
12	57000083	rs139817454	C	T	8	BAZ2A	nonsynonymous SNV	COSM4043675;COSM4043676;COSM4043674	1(stomach)
12	57864118	rs200306754	G	A	1	GLI1	nonsynonymous SNV	COSM3398928	1(central_nervous_system)
12	59280632	rs138577440	T	C	2	LRIG3	nonsynonymous SNV	COSM5654246;COSM5654247	1(haematopoietic_and_lymphoid_tissue)
12	65514824	.	C	G	1	WIF1	nonsynonymous SNV	COSM5675129;COSM5675130	1(lung)
12	95918558	rs372529431	C	T	1	USP44	nonsynonymous SNV	COSM4045504	1(stomach)
12	111856588	rs111360561	C	A	2	SH2B3	nonsynonymous SNV	COSM1685386	1(haematopoietic_and_lymphoid_tissue)
12	111885304	rs559278672	C	T	1	SH2B3	nonsynonymous SNV	COSM5215947;COSM430330	1(breast)
12	122260479	rs372668133	C	T	1	SETD1B	nonsynonymous SNV	COSM5792181;COSM5792180	1(breast)
13	20763366	rs150529554	C	T	1	GJB2	nonsynonymous SNV	COSM2265387	1(breast)
13	32953549	rs28897754	G	T	3	BRCA2	nonsynonymous SNV	COSM5019704;COSM5019703	2(soft_tissue)
13	35619533	.	G	A	1	NBEA	nonsynonymous SNV	COSM6029042;COSM6029041	2(large_intestine)
13	35734141	rs193066744	G	A	5	NBEA	nonsynonymous SNV	COSM1366581;COSM5158909	1(large_intestine)
13	35745410	rs201205330	C	T	4	NBEA	nonsynonymous SNV	COSM5362079;COSM5362080	1(large_intestine)
13	35770201	rs561239166	G	A	1	NBEA	nonsynonymous SNV	COSM4705638;COSM262305	2(liver);1(skin);3(large_intestine);1(endometrium)
13	36124683	.	C	T	1	NBEA	nonsynonymous SNV	COSM276259	1(large_intestine);1(endometrium)
13	36125129	.	C	T	1	NBEA	nonsynonymous SNV	COSM4047246;COSM4047245	1(stomach)
13	92101123	rs142381235	C	T	2	GPC5	nonsynonymous SNV	COSM673573	1(endometrium)
14	32561923	rs141134108	C	T	1	ARHGAP5	nonsynonymous SNV	COSM4476159	1(skin)
14	45667921	rs144567652	C	T	3	FANCM	stopgain	COSM5019161	1(soft_tissue)
14	56079248	rs529619703	C	T	1	KTN1	nonsynonymous SNV	COSM4496803	1(skin)
14	92441008	rs141259390	G	A	2	TRIP11	nonsynonymous SNV	COSM4148304	1(thyroid)
14	94849388	rs28931570	G	A	2	SERPINA1	nonsynonymous SNV	COSM959169	1(soft_tissue);1(endometrium)
14	95574253	rs149242330	C	T	5	DICER1	nonsynonymous SNV	COSM959266	1(endometrium)
14	96178699	rs146705048	C	T	1	TCL1A	nonsynonymous SNV	COSM4953620	2(liver)
15	52662499	rs1005760412	G	A	1	MYO5A	nonsynonymous SNV	COSM4485445;COSM4485444	1(skin);1(biliary_tract)
15	56385955	rs188930329	C	T	1	RFX7	nonsynonymous SNV	COSM5940539;COSM5940538	1(skin)
15	56388173	rs140370063	C	T	1	RFX7	nonsynonymous SNV	COSM3794262;COSM3794261	1(urinary_tract)
15	80450417	.	G	A	1	FAH	nonsynonymous SNV	COSM3504439	1(skin)
15	81517936	.	A	C	1	IL16	nonsynonymous SNV	COSM1629706;COSM1629707	2(liver)
15	91308570	rs146077918	C	T	7	BLM	nonsynonymous SNV	COSM3505421	2(skin)
15	93567735	rs1486760399	C	T	1	CHD2	nonsynonymous SNV	COSM966723	1(endometrium)
16	2120487	rs1800729	G	A	8	TSC2	nonsynonymous SNV	COSM5019065;COSM5019066	1(soft_tissue)
16	2138570	rs45517423	C	T	3	TSC2	nonsynonymous SNV	COSM87828	1(pancreas)
16	3820773	rs142047649	G	A	1	CREBBP	nonsynonymous SNV	COSM96413	1(breast);1(haematopoietic_and_lymphoid_tissue);1(soft_tissue);2(lung)
16	9857574	rs145063086	G	C	1	GRIN2A	nonsynonymous SNV	COSM107888	1(skin)
16	15844048	rs111404182	G	A	1	MYH11	nonsynonymous SNV	COSM2127188;COSM2127189	1(oesophagus);1(prostate)
16	15872688	rs150759461	G	A	1	MYH11	nonsynonymous SNV	COSM3887969;COSM3887970	1(skin)
16	30133311	rs200617125	C	T	2	MAPK3	nonsynonymous SNV	COSM3111839;COSM3111840;COSM4259390	1(large_intestine)
16	67670682	rs145727304	C	T	4	CTCF	nonsynonymous SNV	COSM4169929	1(haematopoietic_and_lymphoid_tissue)
16	72991395	rs148618101	C	G	1	ZFHX3	nonsynonymous SNV	COSM4170072	1(haematopoietic_and_lymphoid_tissue)
16	88967923	rs143043820	G	A	1	CBFA2T3	nonsynonymous SNV	COSM5989714	1(haematopoietic_and_lymphoid_tissue)
17	1257610	.	C	T	1	YWHAE	nonsynonymous SNV	COSM5513234;COSM5513235	1(biliary_tract)
17	8045714	rs112743620	C	T,A	2	PER1	nonsynonymous SNV	COSM5020554	1(soft_tissue)
17	15983762	rs139706730	C	G	3	NCOR1	nonsynonymous SNV	COSM5574213;COSM5574214	1(haematopoietic_and_lymphoid_tissue)
17	20108476	rs202164673	T	A	1	SPECC1	nonsynonymous SNV	COSM3736159	1(skin)
17	20108795	rs377027470	G	A	1	SPECC1	nonsynonymous SNV	COSM2798542;COSM5510885	1(biliary_tract)
17	29679412	rs148154172	C	T	1	NF1	nonsynonymous SNV	COSM5019804;COSM5019803;COSM5019802	1(soft_tissue)
17	37872145	rs142456637	C	T	2	ERBB2	nonsynonymous SNV	COSM5019397;COSM5019396	1(soft_tissue)
17	63526198	rs140344858	C	T	1	AXIN2	nonsynonymous SNV	COSM983020	1(endometrium)
17	63532528	rs138287857	G	A	1	AXIN2	nonsynonymous SNV	COSM3665212	1(oesophagus)
17	78319718	rs202143169	G	A	1	RNF213	nonsynonymous SNV	COSM4580222;COSM4580221	1(bone)
18	22806966	rs150250688	C	T	3	ZNF521	nonsynonymous SNV	COSM5904471	1(skin)
18	42530797	rs548105094	C	T	1	SETBP1	nonsynonymous SNV	COSM2812054	1(stomach)
18	42533267	rs149638556	G	A	3	SETBP1	nonsynonymous SNV	COSM5989938	1(haematopoietic_and_lymphoid_tissue)
18	50832030	rs369809232	C	T	1	DCC	nonsynonymous SNV	COSM4072539;COSM4072540	1(stomach);5(prostate)
18	56184297	rs55647142	C	T	1	ALPK2	nonsynonymous SNV	COSM231742;COSM231743	1(skin)
19	1650226	rs147133056	C	A	1	TCF3	nonsynonymous SNV	COSM1391233;COSM1391234	1(large_intestine)
19	8993450	rs796290489	A	C	1	MUC16	nonsynonymous SNV	COSM5763744	1(large_intestine)
19	9057564	.	CT	C	1	MUC16	frameshift deletion	COSM5747990;COSM5747989	1(pancreas)
19	9057667	.	G	A	1	MUC16	stopgain	COSM6086988;COSM6086987	1(lung)
19	10305545	rs1216341078	G	A	1	DNMT1	nonsynonymous SNV	COSM5854544;COSM5854543	1(NS)
19	10610439	rs202181679	C	T	3	KEAP1	nonsynonymous SNV	COSM2812647	1(large_intestine)
19	14626895	rs143320658	G	A	1	DNAJB1	nonsynonymous SNV	COSM330692	1(lung)
19	17945708	rs146837396	C	G	4	JAK3	nonsynonymous SNV	COSM5946070	1(NS)
19	18876306	rs138875847	C	T	8	CRTC1	nonsynonymous SNV	COSM5020749;COSM5020750	1(soft_tissue)
19	42598028	rs200445754	G	A	1	POU2F2	nonsynonymous SNV	COSM3823214;COSM3823213;COSM5202644	1(breast)
19	42795144	rs201439084	C	T	1	CIC	nonsynonymous SNV	COSM4985722	1(soft_tissue)
19	50917023	rs145473716	G	A	1	POLD1	nonsynonymous SNV	COSM3692994;COSM3692995	1(large_intestine)
19	54646887	.	G	A	1	CNOT3	nonsynonymous SNV	COSM96799	1(breast);2(haematopoietic_and_lymphoid_tissue);1(urinary_tract);5(prostate)
20	1918051	rs527874912	C	T	1	SIRPA	nonsynonymous SNV	COSM2704814;COSM2704815	1(NS)
20	11900441	rs139514711	C	T	1	BTBD3	nonsynonymous SNV	COSM1024505	1(endometrium)
20	11900456	.	G	A	1	BTBD3	nonsynonymous SNV	COSM1024506	1(large_intestine);1(endometrium)
20	40713385	rs180871064	C	T	1	PTPRT	nonsynonymous SNV	COSM5366032;COSM5366033	1(large_intestine)
20	40733305	rs201162919	G	T	2	PTPRT	nonsynonymous SNV	COSM4989563;COSM4989562	2(soft_tissue)
21	36231833	.	G	A	1	RUNX1	nonsynonymous SNV	COSM4873659;COSM1030461	1(endometrium)
22	19175143	rs201296558	G	A	1	CLTCL1	nonsynonymous SNV	COSM3693932;COSM3693931	1(large_intestine)
22	19184010	rs556579608	T	C	1	CLTCL1	nonsynonymous SNV	COSM4672964;COSM4672963	1(large_intestine)
22	19211467	rs181639433	T	A	5	CLTCL1	nonsynonymous SNV	COSM5021139;COSM5021138	1(soft_tissue)
22	29446903	rs199737518	C	A	1	ZNRF3	nonsynonymous SNV	COSM4987298;COSM4987297	1(soft_tissue)
22	36685292	rs139134727	G	A	6	MYH9	nonsynonymous SNV	COSM1235622	1(haematopoietic_and_lymphoid_tissue)
22	41545151	rs201480900	C	T	2	EP300	nonsynonymous SNV	COSM5608368	1(skin)
X	129156896	.	G	A	1	BCORL1	nonsynonymous SNV	COSM1682880	1(ovary)
