# Supplementary material for: Detection of Rare Germline Variants in the Genomes of B Cell Neoplasms
Source: Preprints.org preprint supplement (doi:10.20944/preprints202101.0330.v1), 2021-01-18
Supplement: Supplementary file 8 [file Supplementary Table 5.xlsx]

## Sheet: Sheet1
CHROM	POS	ID	REF	ALT	QUAL	FILTER	N_CASES	Gene	Variant Type
1	11227549	.	C	G	692.3	PASS	1	MTOR	nonsynonymous SNV
1	11297958	rs566273004	C	T	570	PASS	1	MTOR	nonsynonymous SNV
1	16200775	rs143263475	C	T	4131.1	PASS	4	SPEN	nonsynonymous SNV
1	16235853	.	G	C	595.3	PASS	1	SPEN	nonsynonymous SNV
1	16254776	.	A	G	1264	PASS	1	SPEN	nonsynonymous SNV
1	16254883	rs1246693905	C	G	364.6	PASS	1	SPEN	nonsynonymous SNV
1	16255086	rs181758065	G	A	246.4	PASS	1	SPEN	nonsynonymous SNV
1	16256142	rs184914524	T	C	162.3	PASS	1	SPEN	nonsynonymous SNV
1	16256265	.	G	T	476.9	PASS	1	SPEN	nonsynonymous SNV
1	16257159	rs141407539	G	A	257.9	PASS	1	SPEN	nonsynonymous SNV
1	16261256	rs41269147	A	G	196.7	PASS	1	SPEN	nonsynonymous SNV
1	16263971	.	T	C	933.6	PASS	1	SPEN	nonsynonymous SNV
1	16264022	rs41269153	G	C	626.1	PASS	2	SPEN	nonsynonymous SNV
1	23885773	rs146163818	A	T	208.4	PASS	2	ID3	nonsynonymous SNV
1	27023262	rs1394917679	G	A	253.7	PASS	1	ARID1A	nonsynonymous SNV
1	27023550	rs1450841040	G	T	74.8	PASS	1	ARID1A	nonsynonymous SNV
1	27089693	.	G	A	448.6	PASS	1	ARID1A	nonsynonymous SNV
1	27101022	rs369118235	A	G	151.2	PASS	2	ARID1A	nonsynonymous SNV
1	27102163	.	G	A	707.6	PASS	1	ARID1A	nonsynonymous SNV
1	27106106	rs41303631	G	A	1775	PASS	3	ARID1A	nonsynonymous SNV
1	39317396	rs147181818	C	T	414.7	PASS	3	RRAGC	nonsynonymous SNV
1	39321510	rs541381163	T	C	509.5	PASS	1	RRAGC	nonsynonymous SNV
1	39325281	.	G	A	48.2	PASS	1	RRAGC	nonsynonymous SNV
1	65312368	rs149968614	C	T	434.8	PASS	1	JAK1	nonsynonymous SNV
1	65321324	rs61735631	G	A	522.3	PASS	2	JAK1	nonsynonymous SNV
1	85733329	rs1052221974	C	T	332.8	PASS	1	BCL10	nonsynonymous SNV
1	120458660	.	G	C	270.7	PASS	1	NOTCH2	nonsynonymous SNV
1	120459251	rs143236410	G	T	868.3	PASS	3	NOTCH2	nonsynonymous SNV
1	120465364	rs116321057	C	T	279.5	PASS	1	NOTCH2	nonsynonymous SNV
1	150550799	.	C	A	125.7	PASS	1	MCL1	nonsynonymous SNV
1	167935880	rs146895084	G	A	1277.5	PASS	1	DCAF6	nonsynonymous SNV
1	167962499	rs143999777	G	T	537.8	PASS	3	DCAF6	nonsynonymous SNV
1	190067180	.	TTG	T	634.2	PASS	1	BRINP3	frameshift deletion
1	190234052	.	G	C	1105.5	PASS	1	BRINP3	nonsynonymous SNV
1	190423882	.	G	A	625.5	PASS	1	BRINP3	nonsynonymous SNV
1	245027126	.	G	C	347.4	PASS	1	HNRNPU	nonsynonymous SNV
2	32605339	.	C	G	539.7	PASS	1	BIRC6	nonsynonymous SNV
2	32626684	.	G	A	507.6	PASS	1	BIRC6	nonsynonymous SNV
2	32640659	.	A	G	829.5	PASS	1	BIRC6	nonsynonymous SNV
2	32656154	rs201321733	G	A	527.2	PASS	1	BIRC6	nonsynonymous SNV
2	32667393	rs79589157	T	C	2372.6	PASS	3	BIRC6	nonsynonymous SNV
2	32688363	.	T	C	1618.6	PASS	1	BIRC6	nonsynonymous SNV
2	32692685	rs61754133	A	G	503.9	PASS	1	BIRC6	nonsynonymous SNV
2	32718640	.	T	C	907.5	PASS	1	BIRC6	nonsynonymous SNV
2	32724850	.	G	C	548.7	PASS	1	BIRC6	nonsynonymous SNV
2	32728142	.	C	G	489	PASS	1	BIRC6	nonsynonymous SNV
2	32733170	.	C	T	630.6	PASS	1	BIRC6	nonsynonymous SNV
2	32740353	rs61757638	C	T	6074.8	PASS	7	BIRC6	nonsynonymous SNV
2	32756425	.	A	T	2082.1	PASS	1	BIRC6	nonsynonymous SNV
2	32768467	rs199654826	T	A	872.6	PASS	1	BIRC6	nonsynonymous SNV
2	32770927	.	G	T	432.4	PASS	1	BIRC6	nonsynonymous SNV
2	32774425	.	G	A	2416.5	PASS	1	BIRC6	nonsynonymous SNV
2	48027580	.	A	G	439	PASS	1	MSH6	nonsynonymous SNV
2	48033423	rs147453999	A	T	493	PASS	1	MSH6	nonsynonymous SNV
2	48033741	.	A	T	545.5	PASS	1	MSH6	stopgain
2	48033995	.	T	C	433.5	PASS	1	MSH6	nonsynonymous SNV
2	48059947	.	G	T	445.3	PASS	1	FBXO11	nonsynonymous SNV
2	48066142	.	G	A	477.3	PASS	1	FBXO11	nonsynonymous SNV
2	61753571	.	T	C	1639.7	PASS	1	XPO1	nonsynonymous SNV
2	85273237	.	G	T	188.8	PASS	1	KCMF1	nonsynonymous SNV
2	85276747	.	A	G	587.4	PASS	1	KCMF1	nonsynonymous SNV
2	96810009	.	A	C	378	PASS	1	DUSP2	nonsynonymous SNV
2	102476184	.	T	A	400.4	PASS	1	MAP4K4	nonsynonymous SNV
2	102481428	rs56048147	T	A	326.1	PASS	1	MAP4K4	nonsynonymous SNV
2	145162535	.	C	T	413.4	PASS	1	ZEB2	nonsynonymous SNV
2	145274908	rs146394306	G	C	248	PASS	2	ZEB2	nonsynonymous SNV
2	202141673	.	G	A	631	PASS	1	CASP8	nonsynonymous SNV
3	9475992	.	C	T	826.8	PASS	1	SETD5
3	9476025	.	T	C	1834.5	PASS	1	SETD5	nonsynonymous SNV
3	9517188	rs1402788547	C	T	454.2	PASS	1	SETD5	nonsynonymous SNV
3	9517443	rs1347746280	A	G	664.7	PASS	1	SETD5	nonsynonymous SNV
3	30713698	.	C	CA	1395.7	PASS	1	TGFBR2	frameshift insertion
3	30713834	rs35766612	G	A	2964.7	PASS	4	TGFBR2	nonsynonymous SNV
3	47079245	rs76132393	T	C	207.9	PASS	1	SETD2	nonsynonymous SNV
3	47084109	rs564576540	T	C	1627.1	PASS	1	SETD2	nonsynonymous SNV
3	47088054	.	G	A	566.3	PASS	1	SETD2	nonsynonymous SNV
3	47155379	.	T	C	776.1	PASS	1	SETD2	nonsynonymous SNV
3	47165151	.	T	A	429.3	PASS	1	SETD2	nonsynonymous SNV
3	47165404	.	G	A	1265.2	PASS	1	SETD2	nonsynonymous SNV
3	50289947	rs183955200	G	A	272.5	PASS	1	GNAI2	nonsynonymous SNV
3	50293752	.	A	G	387	PASS	1	GNAI2	nonsynonymous SNV
3	71015168	rs202173892	C	T	550.5	PASS	1	FOXP1	nonsynonymous SNV
3	71027110	rs200355554	G	C	1463.3	PASS	3	FOXP1	nonsynonymous SNV
3	71064716	.	A	G	456	PASS	1	FOXP1	nonsynonymous SNV
3	73432565	rs145452940	G	A	2067.4	PASS	3	PDZRN3	nonsynonymous SNV
3	73439024	rs146640162	G	C	334.6	PASS	1	PDZRN3	nonsynonymous SNV
3	73450098	.	A	C	1463	PASS	1	PDZRN3	nonsynonymous SNV
3	73450146	rs141385664	T	C	1893.6	PASS	1	PDZRN3	nonsynonymous SNV
3	73453470	.	A	G	1565.1	PASS	1	PDZRN3	nonsynonymous SNV
3	73657832	rs150437956	C	T	689.5	PASS	2	PDZRN3	nonsynonymous SNV
3	105378061	rs55821768	G	C	643.1	PASS	1	CBLB	nonsynonymous SNV
3	105389086	.	A	G	897.6	PASS	1	CBLB	nonsynonymous SNV
3	105438946	.	T	C	340	PASS	1	CBLB	nonsynonymous SNV
3	105452960	.	T	C	369.5	PASS	1	CBLB	nonsynonymous SNV
3	142272098	rs141783863	A	G	653.2	PASS	1	ATR	nonsynonymous SNV
3	142272513	.	T	G	137.3	PASS	1	ATR	nonsynonymous SNV
3	142272549	.	G	A	904.4	PASS	1	ATR	nonsynonymous SNV
3	142839681	rs545988820	C	T	437.4	PASS	1	CHST2	nonsynonymous SNV
3	154836554	rs147564881	G	C	841.1	PASS	3	MME	nonsynonymous SNV
3	154859862	rs138218277	A	G	728.5	PASS	3	MME	nonsynonymous SNV
3	154860085	rs200791566	G	A	953.1	PASS	1	MME	nonsynonymous SNV
3	154884774	.	A	G	412.8	PASS	1	MME	nonsynonymous SNV
3	168802737	rs201825977	G	A	563.6	PASS	1	MECOM	nonsynonymous SNV
3	168819949	.	A	C	994.3	PASS	1	MECOM	nonsynonymous SNV
3	168834158	rs199568118	T	C	922.2	PASS	2	MECOM	nonsynonymous SNV
3	168834305	rs145677287	T	G	84.5	PASS	1	MECOM	nonsynonymous SNV
3	168840462	rs34896995	T	C	566.7	PASS	3	MECOM	nonsynonymous SNV
3	168845789	.	C	T	453.4	PASS	1	MECOM	nonsynonymous SNV
3	187444636	.	C	A	619.4	PASS	1	BCL6	nonsynonymous SNV
3	187446313	rs137878288	G	A	41	PASS	1	BCL6	nonsynonymous SNV
3	187447463	rs529677174	G	A	417.3	PASS	1	BCL6	nonsynonymous SNV
3	187449515	rs372779365	C	T	226.3	PASS	1	BCL6	nonsynonymous SNV
3	187449516	rs551620719	G	A	578.7	PASS	1	BCL6	nonsynonymous SNV
4	73941995	rs144043898	G	C	848.4	PASS	2	ANKRD17	nonsynonymous SNV
4	74000880	.	G	A	546.8	PASS	1	ANKRD17	nonsynonymous SNV
4	83861100	rs140374560	A	G	481.5	PASS	1	LIN54	nonsynonymous SNV
4	83867599	rs34929292	G	C	1254.7	PASS	2	LIN54	nonsynonymous SNV
4	106156255	.	G	T	396.2	PASS	1	TET2	nonsynonymous SNV
4	106157472	.	T	A	391.2	PASS	1	TET2	stopgain
4	135121247	.	G	A	2052.2	PASS	1	PABPC4L	stopgain
5	67522580	.	T	C	218.9	PASS	1	PIK3R1	nonsynonymous SNV
5	67591254	.	G	T	536.6	PASS	1	PIK3R1	nonsynonymous SNV
5	98192320	.	A	T	263.4	PASS	1	CHD1	nonsynonymous SNV
5	98193990	rs138351327	G	A	1661.1	PASS	3	CHD1	nonsynonymous SNV
5	98216872	rs567874073	T	C	379.2	PASS	1	CHD1	nonsynonymous SNV
5	98224802	rs144567251	T	A	927	PASS	4	CHD1	nonsynonymous SNV
5	123976999	.	T	A	2328.7	PASS	1	ZNF608	nonsynonymous SNV
5	123979338	.	C	A	462	PASS	1	ZNF608	nonsynonymous SNV
5	124079821	.	C	T	935.8	PASS	1	ZNF608	nonsynonymous SNV
5	124080379	rs139312462	T	C	1623.7	PASS	5	ZNF608	nonsynonymous SNV
5	158526589	.	AC	A	227.6	PASS	1	EBF1	splice_donor
6	18439952	.	A	G	937.3	PASS	1	RNF144B	nonsynonymous SNV
6	18459948	.	A	G	1151.4	PASS	1	RNF144B	nonsynonymous SNV
6	26056129	rs140766420	C	A	553.9	PASS	1	HIST1H1C	nonsynonymous SNV
6	26056240	rs547786942	C	G	388.2	PASS	1	HIST1H1C	nonsynonymous SNV
6	26156834	.	C	G	225.1	PASS	1	HIST1H1E	nonsynonymous SNV
6	26157015	rs1381465342	G	A	270.2	PASS	2	HIST1H1E	nonsynonymous SNV
6	27101191	.	C	G	908.3	PASS	1	HIST1H2AG	nonsynonymous SNV
6	27835061	.	T	G	1212.2	PASS	1	HIST1H1B	nonsynonymous SNV
6	27839834	rs549064212	C	T	373.6	PASS	1	HIST1H3I	nonsynonymous SNV
6	27839996	.	G	C	44.9	PASS	1	HIST1H3I	nonsynonymous SNV
6	27858417	.	T	C	399.5	PASS	1	HIST1H3J	nonsynonymous SNV
6	37138956	.	G	A	59.7	PASS	1	PIM1	nonsynonymous SNV
6	37139030	rs35760989	G	C	1048	PASS	5	PIM1	nonsynonymous SNV
6	37139094	.	G	T	247.7	PASS	1	PIM1	nonsynonymous SNV
6	37139098	.	C	A	81.4	PASS	1	PIM1	nonsynonymous SNV
6	41908701	.	G	C	215.9	PASS	1	CCND3	nonsynonymous SNV
6	87953322	rs184839913	T	G	261	PASS	2	ZNF292	nonsynonymous SNV
6	87964726	.	T	C	691.5	PASS	1	ZNF292	nonsynonymous SNV
6	87965046	.	G	A	647	PASS	1	ZNF292	nonsynonymous SNV
6	87965776	.	A	G	329.2	PASS	1	ZNF292	nonsynonymous SNV
6	87965943	.	GAGAA	G	176.5	PASS	1	ZNF292	frameshift deletion
6	87966169	.	T	C	485.8	PASS	1	ZNF292	nonsynonymous SNV
6	87966641	.	C	G	1069.3	PASS	1	ZNF292	nonsynonymous SNV
6	87967393	rs572597069	G	A	1029.9	PASS	1	ZNF292	nonsynonymous SNV
6	87968677	rs41273279	C	T	1149.3	PASS	3	ZNF292	nonsynonymous SNV
6	87969118	rs1191785376	G	A	510.9	PASS	1	ZNF292	nonsynonymous SNV
6	90642474	.	G	A	423.4	PASS	1	BACH2	nonsynonymous SNV
6	90660424	.	C	A	373.4	PASS	1	BACH2	nonsynonymous SNV
6	90660581	rs149898769	C	T	434.4	PASS	4	BACH2	nonsynonymous SNV
6	106543549	rs139534654	A	G	599.9	PASS	2	PRDM1	nonsynonymous SNV
6	106547240	rs374709917	G	C	643.5	PASS	1	PRDM1	nonsynonymous SNV
6	106554879	.	G	A	310.5	PASS	1	PRDM1	nonsynonymous SNV
6	128297846	.	A	G	261.7	PASS	1	PTPRK	nonsynonymous SNV
6	128303989	rs144386522	T	A	718.8	PASS	1	PTPRK	nonsynonymous SNV
6	128313848	.	G	T	291	PASS	1	PTPRK	nonsynonymous SNV
6	128718818	rs199678395	T	C	1115.7	PASS	2	PTPRK	startloss
6	138202173	rs201429571	G	A	1629.8	PASS	1	TNFAIP3	nonsynonymous SNV
6	152454457	.	T	G	2231.3	PASS	1	SYNE1	nonsynonymous SNV
6	152454556	rs139834542	A	G	564.6	PASS	3	SYNE1	nonsynonymous SNV
6	152461162	rs119103248	C	T	856.2	PASS	2	SYNE1	nonsynonymous SNV
6	152527476	rs200236760	G	A	555.3	PASS	1	SYNE1	nonsynonymous SNV
6	152536125	.	G	T	435.4	PASS	1	SYNE1	nonsynonymous SNV
6	152542654	rs565754195	T	C	1022.3	PASS	1	SYNE1	nonsynonymous SNV
6	152545711	rs140962690	A	G	953.6	PASS	1	SYNE1	nonsynonymous SNV
6	152615118	rs147998933	A	G	643.2	PASS	2	SYNE1	nonsynonymous SNV
6	152651266	.	C	T	994.9	PASS	1	SYNE1	nonsynonymous SNV
6	152651557	rs41301343	G	A	1106.9	PASS	3	SYNE1	nonsynonymous SNV
6	152651911	rs142388112	C	T	909.1	PASS	1	SYNE1	nonsynonymous SNV
6	152665286	.	A	G	435.8	PASS	1	SYNE1	nonsynonymous SNV
6	152671401	rs577279875	C	T	281.4	PASS	1	SYNE1	nonsynonymous SNV
6	152690199	rs149901087	G	C	163.7	PASS	1	SYNE1	nonsynonymous SNV
6	152697692	rs117360770	G	C	538.1	PASS	2	SYNE1	nonsynonymous SNV
6	152720802	.	A	C	584.4	PASS	1	SYNE1	nonsynonymous SNV
6	152730821	rs577979265	A	G	1431	PASS	1	SYNE1	nonsynonymous SNV
6	152751666	.	A	G	2063.1	PASS	1	SYNE1	nonsynonymous SNV
6	152762383	rs144566713	C	T	323.3	PASS	2	SYNE1	nonsynonymous SNV
6	152768682	rs201743223	C	A	318.7	PASS	1	SYNE1	nonsynonymous SNV
6	152774686	rs547705798	AG	A	674.3	PASS	3	SYNE1
6	152783904	.	A	G	1302.5	PASS	1	SYNE1	nonsynonymous SNV
6	152949429	.	T	C	540.6	PASS	1	SYNE1	nonsynonymous SNV
6	157099526	rs1378351788	G	A	226.9	PASS	1	ARID1B	nonsynonymous SNV
6	157099528	rs200808642	G	T	226.9	PASS	1	ARID1B	nonsynonymous SNV
6	157150491	.	A	G	827.7	PASS	1	ARID1B	nonsynonymous SNV
6	157405848	.	G	C	755.9	PASS	1	ARID1B	nonsynonymous SNV
6	157511242	rs138784762	A	G	1596	PASS	1	ARID1B	nonsynonymous SNV
7	2954916	.	G	C	148.5	PASS	1	CARD11	nonsynonymous SNV
7	116339677	.	T	A	1061.6	PASS	1	MET	nonsynonymous SNV
7	116340177	rs200074800	G	A	301.6	PASS	1	MET	nonsynonymous SNV
7	116371911	.	C	A	155.1	PASS	1	MET	nonsynonymous SNV
7	116411923	rs34589476	C	T	380.9	PASS	1	MET	nonsynonymous SNV
7	116415124	rs370529693	C	T	1217.8	PASS	1	MET	nonsynonymous SNV
7	116436003	.	TG	T	1074.5	PASS	1	MET	frameshift deletion
7	124482897	rs143635917	T	C	626.8	PASS	1	POT1	nonsynonymous SNV
7	124511092	.	T	C	1418.7	PASS	1	POT1	nonsynonymous SNV
7	140439694	.	C	T	313.1	PASS	1	BRAF	nonsynonymous SNV
7	148515137	rs1441187386	G	A	1787.3	PASS	1	EZH2	nonsynonymous SNV
7	151842343	.	C	T	352.4	PASS	1	KMT2C	nonsynonymous SNV
7	151843784	rs142657994	A	C	367	PASS	1	KMT2C	nonsynonymous SNV
7	151845823	.	T	C	1676.3	PASS	1	KMT2C	nonsynonymous SNV
7	151849963	.	G	C	218.5	PASS	1	KMT2C	nonsynonymous SNV
7	151849978	.	T	C	1616	PASS	1	KMT2C	nonsynonymous SNV
7	151851379	.	G	A	546.1	PASS	1	KMT2C	nonsynonymous SNV
7	151854907	.	C	T	414.7	PASS	1	KMT2C
7	151859914	rs546643392	G	A	307.3	PASS	1	KMT2C	nonsynonymous SNV
7	151860025	.	T	C	942.2	PASS	1	KMT2C	nonsynonymous SNV
7	151866318	.	T	C	513.5	PASS	1	KMT2C	nonsynonymous SNV
7	151874175	.	T	C	342.9	PASS	1	KMT2C	nonsynonymous SNV
7	151875013	rs900510100	C	T	386.2	PASS	1	KMT2C	nonsynonymous SNV
7	151875093	rs530218895	A	G	151	PASS	1	KMT2C	nonsynonymous SNV
7	151878209	.	T	G	1231.6	PASS	1	KMT2C	nonsynonymous SNV
7	151879194	.	T	A	374.6	PASS	1	KMT2C	nonsynonymous SNV
7	151891116	.	C	A	676.6	PASS	1	KMT2C	nonsynonymous SNV
7	151949698	rs140919432	G	T	282	PASS	1	KMT2C	nonsynonymous SNV
8	28413359	.	C	T	1159.4	PASS	1	FZD3	nonsynonymous SNV
8	28420428	rs147574227	G	A	434	PASS	1	FZD3	nonsynonymous SNV
8	52320642	rs200978094	C	A	1303.9	PASS	1	PXDNL	nonsynonymous SNV
8	52469407	rs777981874	C	G	455.9	PASS	1	PXDNL	nonsynonymous SNV
8	59727976	rs146676487	G	A	505.3	PASS	5	TOX	nonsynonymous SNV
8	59728090	rs138337223	G	A	266.5	PASS	1	TOX	nonsynonymous SNV
8	59728189	rs201823077	G	A	420.5	PASS	1	TOX	nonsynonymous SNV
8	103289209	.	G	A	359.2	PASS	2	UBR5	nonsynonymous SNV
8	103310692	.	T	C	184.7	PASS	1	UBR5	nonsynonymous SNV
8	103316307	.	C	T	424.5	PASS	1	UBR5	nonsynonymous SNV
8	103340036	rs200599625	C	T	606.5	PASS	2	UBR5	nonsynonymous SNV
8	128750527	rs146505192	T	C	1378.5	PASS	3	MYC	nonsynonymous SNV
8	128750972	.	C	T	309.5	PASS	1	MYC	nonsynonymous SNV
8	128750986	rs4645960	G	T	3894.2	PASS	1	MYC	nonsynonymous SNV
8	135490774	rs201818197	A	G	1655.7	PASS	2	ZFAT	nonsynonymous SNV
8	135615163	.	G	T	919.6	PASS	1	ZFAT	nonsynonymous SNV
8	135622851	rs75596750	G	A	858.7	PASS	3	ZFAT	nonsynonymous SNV
8	144941229	rs144123426	A	T	642.3	PASS	4	EPPK1	nonsynonymous SNV
8	144941565	.	C	T	408.1	PASS	1	EPPK1	nonsynonymous SNV
8	144942135	.	C	T	400.9	PASS	1	EPPK1	nonsynonymous SNV
8	144942209	.	G	C	443.4	PASS	1	EPPK1	nonsynonymous SNV
8	144942387	rs199598193	G	A	753.6	PASS	3	EPPK1	nonsynonymous SNV
8	144942482	rs111830312	C	T	253.7	PASS	1	EPPK1	nonsynonymous SNV
8	144942519	rs545933698	C	T	1948.4	PASS	1	EPPK1	nonsynonymous SNV
8	144942975	rs201982226	G	A	147.1	PASS	1	EPPK1	nonsynonymous SNV
8	144943446	rs199499630	C	T	502.5	PASS	1	EPPK1	nonsynonymous SNV
8	144946484	rs144289918	C	A	557.1	PASS	3	EPPK1	nonsynonymous SNV
8	144946771	.	C	G	153	PASS	1	EPPK1	nonsynonymous SNV
8	144947118	.	C	T	184.4	PASS	1	EPPK1	nonsynonymous SNV
8	144947228	rs200139141	A	T	166.9	PASS	1	EPPK1	nonsynonymous SNV
9	93641206	rs886319107	G	C	719.7	PASS	1	SYK	nonsynonymous SNV
9	93650837	.	G	A	469.9	PASS	1	SYK	nonsynonymous SNV
9	95997245	rs1444551716	T	C	207.9	PASS	1	WNK2	nonsynonymous SNV
9	139391876	.	C	T	377.4	PASS	1	NOTCH1	nonsynonymous SNV
9	139401234	rs182330532	G	A	1001.2	PASS	1	NOTCH1	nonsynonymous SNV
9	139405111	rs201620358	G	A	289.1	PASS	5	NOTCH1	nonsynonymous SNV
9	139820166	rs540379507	G	A	176.4	PASS	2	TRAF2	nonsynonymous SNV
9	139820309	rs142412558	G	A	228.5	PASS	1	TRAF2	nonsynonymous SNV
10	28824554	.	G	A	491.2	PASS	1	WAC	nonsynonymous SNV
10	28897205	.	C	T	1419.5	PASS	2	WAC	nonsynonymous SNV
10	28900272	.	TAAAC	T	205.8	PASS	1	WAC
10	63700087	rs150284163	A	C	403	PASS	5	ARID5B	nonsynonymous SNV
10	63845501	.	G	A	266	PASS	1	ARID5B	nonsynonymous SNV
11	62569037	rs199769585	G	C	214.1	PASS	1	NXF1	nonsynonymous SNV
11	108106417	.	C	T	488.4	PASS	1	ATM	stopgain
11	108115566	.	CT	C	281.2	PASS	1	ATM	frameshift deletion
11	108119823	rs56128736	T	C	980.7	PASS	10	ATM	nonsynonymous SNV
11	108121787	rs35963548	G	A	291.9	PASS	1	ATM	nonsynonymous SNV
11	108128246	rs34231402	T	A	759.4	PASS	2	ATM	nonsynonymous SNV
11	108141789	rs1060501703	A	G	154	PASS	1	ATM	splice_acceptor
11	108143329	.	C	T	355	PASS	1	ATM	nonsynonymous SNV
11	108159720	.	C	T	691.3	PASS	1	ATM	nonsynonymous SNV
11	108160480	rs138327406	T	G	869.2	PASS	1	ATM	nonsynonymous SNV
11	108186610	rs11212587	G	A	533.3	PASS	4	ATM	nonsynonymous SNV
11	108196075	.	A	T	447.1	PASS	1	ATM	nonsynonymous SNV
11	108205787	rs1064793406	TAA	T	261.9	PASS	1	ATM	frameshift deletion
11	108235906	.	C	T	207.4	PASS	1	ATM	nonsynonymous SNV
11	108236070	.	CAACAAAGTAGCTGAACGTGTCTTAATGA	C	191.4	PASS	1	ATM	frameshift deletion
11	108536011	rs149622934	C	G	589.4	PASS	3	DDX10	nonsynonymous SNV
11	108550250	rs142321169	C	G	1049.7	PASS	2	DDX10	nonsynonymous SNV
11	108550284	.	A	G	501.7	PASS	1	DDX10	nonsynonymous SNV
11	108709186	rs138955971	C	T	635.6	PASS	1	DDX10	nonsynonymous SNV
11	108712161	rs147274149	T	G	814	PASS	1	DDX10	nonsynonymous SNV
11	128359269	rs79963544	C	T	816.5	PASS	8	ETS1	nonsynonymous SNV
12	4385357	.	G	A	143.1	PASS	1	CCND2	nonsynonymous SNV
12	7061285	.	G	A	194.1	PASS	1	PTPN6	nonsynonymous SNV
12	7064576	rs201345298	C	A	404.7	PASS	1	PTPN6	nonsynonymous SNV
12	7067226	rs62621988	G	A	274.8	PASS	1	PTPN6	nonsynonymous SNV
12	12022810	.	C	G	1096.4	PASS	1	ETV6	nonsynonymous SNV
12	25368451	rs368557003	T	C	1397	PASS	1	KRAS	nonsynonymous SNV
12	49424797	rs1290937992	G	A	866.1	PASS	1	KMT2D	nonsynonymous SNV
12	49425230	rs199797812	G	A	664.1	PASS	1	KMT2D	nonsynonymous SNV
12	49426003	rs201078160	C	T	.	PASS	1	KMT2D	nonsynonymous SNV
12	49428231	.	G	C	276.6	PASS	1	KMT2D	nonsynonymous SNV
12	49428694	rs146044282	T	C	3521.5	PASS	7	KMT2D	nonsynonymous SNV
12	49431133	.	C	T	142.2	PASS	1	KMT2D	nonsynonymous SNV
12	49431926	.	C	A	1619.8	PASS	1	KMT2D	nonsynonymous SNV
12	49433607	.	C	T	1080.9	PASS	1	KMT2D	nonsynonymous SNV
12	49434957	.	T	C	334.4	PASS	1	KMT2D	nonsynonymous SNV
12	49439938	.	C	T	524.3	PASS	1	KMT2D	nonsynonymous SNV
12	49443551	.	C	A	1648.1	PASS	1	KMT2D	nonsynonymous SNV
12	49443799	rs112236653	G	A	187.7	PASS	1	KMT2D	nonsynonymous SNV
12	49448803	.	C	T	663.1	PASS	1	KMT2D	nonsynonymous SNV
12	57000083	rs139817454	C	T	4141.4	PASS	8	BAZ2A	nonsynonymous SNV
12	57003547	rs200427331	G	A	253.2	PASS	1	BAZ2A	nonsynonymous SNV
12	57005810	.	A	C	616.7	PASS	2	BAZ2A	nonsynonymous SNV
12	57006959	.	G	T	300.9	PASS	1	BAZ2A	nonsynonymous SNV
12	113532882	.	C	G	746.3	PASS	1	DTX1	nonsynonymous SNV
12	122255297	rs374547458	G	A	560.4	PASS	1	SETD1B	nonsynonymous SNV
12	122257694	rs565436724	C	T	390.6	PASS	2	SETD1B	nonsynonymous SNV
12	122260479	rs372668133	C	T	639.5	PASS	1	SETD1B	nonsynonymous SNV
12	122260698	.	G	C	74.7	PASS	1	SETD1B	nonsynonymous SNV
12	122261215	rs547984481	C	T	208	PASS	1	SETD1B	nonsynonymous SNV
13	21362667	.	A	T	422.2	PASS	1	XPO4	nonsynonymous SNV
13	21417959	rs1283500665	T	C	514.9	PASS	1	XPO4	nonsynonymous SNV
13	41133856	rs1273268681	C	T	254.9	PASS	1	FOXO1	nonsynonymous SNV
13	41133967	rs139398811	C	T	363.1	PASS	1	FOXO1	nonsynonymous SNV
14	21861809	.	C	G	466.6	PASS	1	CHD8	nonsynonymous SNV
14	21861869	rs145300090	C	T	461.1	PASS	1	CHD8	nonsynonymous SNV
14	35873822	.	T	C	919.1	PASS	1	NFKBIA	nonsynonymous SNV
14	69262791	.	C	A	413.6	PASS	1	ZFP36L1	splice_donor
14	69262951	.	G	A	918.7	PASS	1	ZFP36L1	nonsynonymous SNV
14	93290929	.	G	C	641.5	PASS	1	GOLGA5	nonsynonymous SNV
14	93299492	.	GCAGT	G	1710.3	PASS	1	GOLGA5	frameshift deletion
14	95557579	.	C	G	252.1	PASS	1	DICER1	nonsynonymous SNV
14	95574253	rs149242330	C	T	798.7	PASS	5	DICER1	nonsynonymous SNV
14	95582948	.	T	C	3095.4	PASS	1	DICER1	nonsynonymous SNV
14	95590785	rs148758903	G	C	1196.1	PASS	1	DICER1	nonsynonymous SNV
14	96178699	rs146705048	C	T	488.5	PASS	1	TCL1A	nonsynonymous SNV
15	41277615	rs141223506	C	T	945.5	PASS	1	INO80	nonsynonymous SNV
15	41364108	.	T	C	667.1	PASS	1	INO80	nonsynonymous SNV
15	41371958	.	G	T	1088.4	PASS	1	INO80	nonsynonymous SNV
15	41961262	.	C	T	341.1	PASS	1	MGA	nonsynonymous SNV
15	41961870	.	G	C	414.4	PASS	1	MGA	nonsynonymous SNV
15	41991134	rs201748568	A	G	492.4	PASS	3	MGA	nonsynonymous SNV
15	42000305	rs1272090898	C	T	258.7	PASS	1	MGA	nonsynonymous SNV
15	42019597	rs377081178	A	G	3889.6	PASS	1	MGA	nonsynonymous SNV
15	42035163	rs1007592948	C	T	710	PASS	1	MGA	nonsynonymous SNV
15	42042466	rs967908721	A	T	419.7	PASS	1	MGA	nonsynonymous SNV
15	42059120	.	G	A	1196	PASS	1	MGA	nonsynonymous SNV
15	42059342	rs71472501	T	C	1918	PASS	2	MGA	nonsynonymous SNV
15	56385955	rs188930329	C	T	570.7	PASS	1	RFX7	nonsynonymous SNV
15	56386432	rs191773270	C	T	446.2	PASS	1	RFX7	nonsynonymous SNV
15	56386940	.	T	C	3122.9	PASS	1	RFX7	nonsynonymous SNV
15	56388173	rs140370063	C	T	880.3	PASS	1	RFX7	nonsynonymous SNV
15	56388386	rs1487788153	C	A	1091.7	PASS	1	RFX7	nonsynonymous SNV
15	56390574	rs750353636	C	A	198.5	PASS	1	RFX7	nonsynonymous SNV
15	75687046	rs532044975	T	C	514	PASS	2	SIN3A	nonsynonymous SNV
15	75699475	.	T	C	547.4	PASS	1	SIN3A	nonsynonymous SNV
15	75704005	rs61761938	G	A	1328.3	PASS	3	SIN3A	nonsynonymous SNV
15	81517936	.	A	C	448.9	PASS	1	IL16	nonsynonymous SNV
15	81571229	rs1272832187	A	G	424.2	PASS	1	IL16	nonsynonymous SNV
15	81591817	rs536694090	T	C	2769.8	PASS	1	IL16	nonsynonymous SNV
15	81598340	.	A	C	1395.8	PASS	1	IL16	nonsynonymous SNV
15	93467774	.	G	A	381.5	PASS	1	CHD2	nonsynonymous SNV
15	93485169	.	A	T	414.6	PASS	1	CHD2	nonsynonymous SNV
15	93563356	rs1365608167	A	G	75.6	PASS	1	CHD2	nonsynonymous SNV
15	93567735	rs1486760399	C	T	716.9	PASS	1	CHD2	nonsynonymous SNV
16	3820773	rs142047649	G	A	324.3	PASS	1	CREBBP	nonsynonymous SNV
16	11000754	.	C	T	743.4	PASS	1	CIITA	nonsynonymous SNV
16	30977081	rs376474875	C	G	1202.8	PASS	1	SETD1A	nonsynonymous SNV
16	67670682	rs145727304	C	T	318.7	PASS	4	CTCF	nonsynonymous SNV
16	67671597	.	C	G	260.6	PASS	1	CTCF	nonsynonymous SNV
16	69334814	.	G	A	543.1	PASS	1	SNTB2	nonsynonymous SNV
16	81892756	.	C	G	437.2	PASS	1	PLCG2	nonsynonymous SNV
16	81953174	rs1477576619	G	A	488.9	PASS	1	PLCG2	nonsynonymous SNV
16	81957106	rs142825971	A	G	492.7	PASS	1	PLCG2	nonsynonymous SNV
16	81965151	rs200677528	G	C	533.6	PASS	1	PLCG2	nonsynonymous SNV
16	81968130	.	A	C	242.8	PASS	1	PLCG2	nonsynonymous SNV
17	7480999	.	C	T	1774.2	PASS	1	EIF4A1	nonsynonymous SNV
17	7481749	.	C	A	1204	PASS	2	EIF4A1	nonsynonymous SNV
17	15950289	rs1480267062	A	T	566.7	PASS	1	NCOR1	nonsynonymous SNV
17	15961841	rs200158089	G	A	751.5	PASS	1	NCOR1	nonsynonymous SNV
17	15971252	rs118021690	G	A	554.2	PASS	1	NCOR1	nonsynonymous SNV
17	15976786	rs200471424	T	G	649.7	PASS	1	NCOR1	nonsynonymous SNV
17	15978907	.	G	A	561.8	PASS	1	NCOR1	nonsynonymous SNV
17	15983762	rs139706730	C	G	459.7	PASS	3	NCOR1	nonsynonymous SNV
17	15995273	.	C	G	1180.8	PASS	1	NCOR1	nonsynonymous SNV
17	16001772	.	G	A	534.2	PASS	1	NCOR1	nonsynonymous SNV
17	16012204	.	T	C	593.5	PASS	1	NCOR1	nonsynonymous SNV
17	16029403	.	C	T	581.9	PASS	1	NCOR1	nonsynonymous SNV
17	29676209	.	A	T	313	PASS	1	NF1	nonsynonymous SNV
17	29679412	rs148154172	C	T	481.7	PASS	1	NF1	nonsynonymous SNV
17	29701073	.	A	G	594.6	PASS	1	NF1	nonsynonymous SNV
17	37922320	.	A	C	314	PASS	1	IKZF3	nonsynonymous SNV
17	37922684	.	C	T	1249.8	PASS	1	IKZF3	nonsynonymous SNV
17	40364168	.	G	A	315.6	PASS	1	STAT5B	nonsynonymous SNV
17	40379567	.	G	A	699.2	PASS	1	STAT5B	nonsynonymous SNV
17	40475360	.	C	T	518	PASS	1	STAT3	nonsynonymous SNV
17	63010416	rs144334275	T	A	445.8	PASS	2	GNA13	nonsynonymous SNV
17	63010848	rs1062597	C	G	774.3	PASS	7	GNA13	nonsynonymous SNV
17	63049619	.	C	A	328.3	PASS	1	GNA13	splice_donor
17	63049685	rs201626569	T	C	1852.3	PASS	1	GNA13	nonsynonymous SNV
18	30349869	rs142480775	G	C	115.2	PASS	1	KLHL14	nonsynonymous SNV
18	30350575	.	C	A	473.9	PASS	1	KLHL14
18	54358969	.	T	C	642	PASS	1	WDR7	nonsynonymous SNV
18	54423856	rs138399196	G	T	771	PASS	2	WDR7	nonsynonymous SNV
18	54423971	rs139102456	C	T	981.8	PASS	5	WDR7	nonsynonymous SNV
18	54605806	.	C	A	585.2	PASS	1	WDR7	nonsynonymous SNV
18	54688000	rs574508992	A	G	477	PASS	1	WDR7	nonsynonymous SNV
18	56184289	rs56067275	G	A	818.2	PASS	1	ALPK2	nonsynonymous SNV
18	56184297	rs55647142	C	T	471.9	PASS	1	ALPK2	nonsynonymous SNV
18	56205096	rs146152799	A	G	464.9	PASS	1	ALPK2	nonsynonymous SNV
18	56205373	rs561573547	T	TG	211.4	PASS	2	ALPK2	frameshift insertion
18	56247152	rs138300448	C	A	201.4	PASS	1	ALPK2	nonsynonymous SNV
19	1615732	.	GT	G	462.5	PASS	1	TCF3	frameshift deletion
19	1615775	rs149277795	C	T	316.8	PASS	1	TCF3	nonsynonymous SNV
19	1615785	rs201250905	C	T	223.7	PASS	1	TCF3	nonsynonymous SNV
19	1625601	rs554419240	C	T	142	PASS	1	TCF3	nonsynonymous SNV
19	1650226	rs147133056	C	A	898.4	PASS	1	TCF3	nonsynonymous SNV
19	10247750	rs1013461054	A	T	307.6	PASS	1	DNMT1	splice_donor
19	10305545	rs1216341078	G	A	473	PASS	1	DNMT1	nonsynonymous SNV
19	10335403	rs3745268	C	T	242.4	PASS	1	S1PR2	nonsynonymous SNV
19	11152102	rs879796805	C	A	357.6	PASS	1	SMARCA4	nonsynonymous SNV
19	12903216	.	A	G	34.1	PASS	1	JUNB	nonsynonymous SNV
19	17945708	rs146837396	C	G	320.2	PASS	4	JAK3	nonsynonymous SNV
19	17947980	rs193922361	G	A	421.9	PASS	1	JAK3	nonsynonymous SNV
19	35827226	rs142629522	G	C	133	PASS	1	CD22	nonsynonymous SNV
19	42598028	rs200445754	G	A	1077.4	PASS	1	POU2F2	nonsynonymous SNV
19	54646887	.	G	A	283.1	PASS	1	CNOT3	nonsynonymous SNV
19	54656002	.	C	T	844.8	PASS	1	CNOT3	nonsynonymous SNV
20	11900441	rs139514711	C	T	936.4	PASS	1	BTBD3	nonsynonymous SNV
20	11900456	.	G	A	1426	PASS	1	BTBD3	nonsynonymous SNV
20	11903546	.	G	T	1329.9	PASS	1	BTBD3	nonsynonymous SNV
20	11904138	.	A	G	275.3	PASS	1	BTBD3	nonsynonymous SNV
20	31021182	rs201899433	G	A	444.5	PASS	1	ASXL1	nonsynonymous SNV
20	35533855	.	G	GC	190.4	PASS	1	SAMHD1	frameshift insertion
20	35539670	.	A	C	2541.7	PASS	1	SAMHD1	stopgain
20	57429275	.	G	A	595.4	PASS	1	GNAS	nonsynonymous SNV
21	36231833	.	G	A	563.8	PASS	1	RUNX1	nonsynonymous SNV
22	23523988	.	A	C	505.5	PASS	1	BCR	nonsynonymous SNV
22	23615924	rs1020634700	C	T	461.3	PASS	3	BCR	nonsynonymous SNV
22	23615950	.	A	G	666.1	PASS	1	BCR	nonsynonymous SNV
22	41545151	rs201480900	C	T	971.4	PASS	2	EP300	nonsynonymous SNV
22	41573601	.	G	C	408.2	PASS	1	EP300	nonsynonymous SNV
22	41573623	rs1437362111	C	T	291.5	PASS	1	EP300	nonsynonymous SNV
22	41574718	.	C	G	1537.8	PASS	1	EP300	nonsynonymous SNV
X	24197650	rs150375972	G	A	4419.5	PASS	3	ZFX	nonsynonymous SNV
X	39932564	rs144722432	C	T	909.1	PASS	1	BCOR	nonsynonymous SNV
X	41201846	.	G	A	455.2	PASS	1	DDX3X	nonsynonymous SNV
X	70357732	.	C	T	447.4	PASS	1	MED12	nonsynonymous SNV
X	70597480	.	C	T	646.7	PASS	1	TAF1	nonsynonymous SNV
X	70674681	rs1184861702	A	G	371.6	PASS	1	TAF1	nonsynonymous SNV
X	76776381	.	A	G	531.3	PASS	1	ATRX	nonsynonymous SNV
X	129200878	rs141284451	G	A	1053.9	PASS	1	ELF4	nonsynonymous SNV
X	154299814	.	G	T	327.1	PASS	1	BRCC3	nonsynonymous SNV
X	154305469	rs28997578	A	G	1817.7	PASS	2	BRCC3	nonsynonymous SNV
X	154319075	.	A	G	245.4	PASS	1	BRCC3	nonsynonymous SNV
