# Supplementary material for: Detection of Rare Germline Variants in the Genomes of B Cell Neoplasms
Source: Preprints.org preprint supplement (doi:10.20944/preprints202101.0330.v1), 2021-01-18
Supplement: Supplementary file 9 [file Supplementary Table 6_.xlsx]

## Sheet: Sheet1
CHROM	POS	ID	REF	ALT	QUAL	FILTER	N_CASES	GENE	ExonicFunc.refGene	ClinVar_SIG	ClinVar_DIS	ClinVar_ID	ClinVar_DB	ClinVar_DBID
1	27101022	rs369118235	A	G	151.2	PASS	2	ARID1A	nonsynonymous SNV	not provided	not_specified	RCV000120062.1	MedGen	CN169374
1	27106106	rs41303631	G	A	1775	PASS	3	ARID1A	nonsynonymous SNV	not provided	not_specified	RCV000120065.1	MedGen	CN169374
1	43804305	rs28928907	G	C	172.6	PASS	1	MPL	nonsynonymous SNV	Pathogenic|not provided	Congenital_amegakaryocytic_thrombocytopenia|not_specified	RCV000015221.26|RCV000121539.1	MedGen:OMIM:Orphanet|MedGen	C1327915:604498:ORPHA3319|CN169374
1	45797157	rs144079536	G	T	316	PASS	1	MUTYH	nonsynonymous SNV	Uncertain significance\x2cUncertain significance|other|other|Uncertain significance	MYH-associated_polyposis\x2cnot_provided|Hereditary_cancer-predisposing_syndrome|MYH-associated_polyposis|not_specified	RCV000205972.2\x2cRCV000034669.1|RCV000115755.7|RCV000123143.6|RCV000212714.3	MedGen:OMIM:Orphanet\x2cMedGen|MedGen:SNOMED_CT|MedGen:OMIM:Orphanet|MedGen	C1837991:608456:ORPHA247798\x2cCN221809|C0027672:699346009|C1837991:608456:ORPHA247798|CN169374
1	45798475	rs34612342	T	C	891.3	PASS	2	MUTYH	nonsynonymous SNV	Pathogenic|Pathogenic|Pathogenic|Pathogenic|not provided|Pathogenic	MYH-associated_polyposis|Endometrial_carcinoma|not_provided|Hereditary_cancer-predisposing_syndrome|not_specified|Carcinoma_of_colon	RCV000005612.10|RCV000005613.2|RCV000079502.5|RCV000115766.8|RCV000121607.1|RCV000144631.1	MedGen:OMIM:Orphanet|MedGen:OMIM:SNOMED_CT|MedGen|MedGen:SNOMED_CT|MedGen|MedGen:OMIM:SNOMED_CT	C1837991:608456:ORPHA247798|C0476089:608089:254878006|CN221809|C0027672:699346009|CN169374|C0699790:114500:269533000
1	47748129	rs149185431	G	A	2724.8	PASS	6	STIL	nonsynonymous SNV	Uncertain significance|Uncertain significance	Primary_autosomal_recessive_microcephaly_7|not_specified	RCV000147679.1|RCV000174071.1	MedGen:OMIM|MedGen	C2675187:612703|CN169374
1	65312368	rs149968614	C	T	434.8	PASS	1	JAK1	nonsynonymous SNV	not provided	not_specified	RCV000121231.1	MedGen	CN169374
1	65321324	rs61735631	G	A	522.3	PASS	2	JAK1	nonsynonymous SNV	not provided	not_specified	RCV000121230.1	MedGen	CN169374
1	120459251	rs143236410	G	T	868.3	PASS	3	NOTCH2	nonsynonymous SNV	Benign	not_specified	RCV000318452.1	MedGen	CN169374
1	120465364	rs116321057	C	T	279.5	PASS	1	NOTCH2	nonsynonymous SNV	Uncertain significance	not_specified	RCV000268720.1	MedGen	CN169374
1	155205634	rs76763715	T	C	453.5	PASS	6	GBA	nonsynonymous SNV	Pathogenic|other|other|Pathogenic|Pathogenic|Pathogenic|Likely pathogenic|Likely pathogenic\x2cPathogenic	Gauchers_disease\x2c_type_1|Parkinson_disease\x2c_late-onset|Dementia\x2c_Lewy_body\x2c_susceptibility_to|not_provided|Susceptibility_to_Parkinsons_Disease|Gaucher_disease|Akinesia|Rigidity\x2cGaucher_disease	RCV000004515.10|RCV000004516.4|RCV000004517.4|RCV000079336.4|RCV000305321.1|RCV000396221.1|RCV000414782.1|RCV000414782.1\x2cRCV000020146.1	MedGen|MedGen|MedGen:Orphanet|Human_Phenotype_Ontology:MedGen|Human_Phenotype_Ontology:MedGen\x2cMedGen:Orphanet	CN221809|CN239381|C0017205:ORPHA355|HP:0002304:C0085623|HP:0002063:C0026837\x2cC0017205:ORPHA355
1	156830742	rs201472270	C	T	448.8	PASS	2	NTRK1	nonsynonymous SNV	Uncertain significance|Uncertain significance	not_specified|Hereditary_insensitivity_to_pain_with_anhidrosis	RCV000220958.2|RCV000299635.1	MedGen|MedGen:OMIM:Orphanet:SNOMED_CT	CN169374|C0020074:256800:ORPHA642:62985007
1	156843439	rs137979116	C	A	389.5	PASS	2	NTRK1	nonsynonymous SNV	Uncertain significance|Uncertain significance	not_specified|Hereditary_insensitivity_to_pain_with_anhidrosis	RCV000236758.2|RCV000284934.1	MedGen|MedGen:OMIM:Orphanet:SNOMED_CT	CN169374|C0020074:256800:ORPHA642:62985007
2	48033423	rs147453999	A	T	493	PASS	1	MSH6	nonsynonymous SNV	Uncertain significance|other|Uncertain significance	Hereditary_cancer-predisposing_syndrome|Lynch_syndrome|not_specified	RCV000115419.6|RCV000122966.4|RCV000212687.2	MedGen:SNOMED_CT|MedGen:Orphanet:SNOMED_CT|MedGen	C0027672:699346009|C1333990:ORPHA144:315058005|CN169374
2	145274908	rs146394306	G	C	248	PASS	2	ZEB2	nonsynonymous SNV	Likely benign|Likely benign	Mowat-Wilson_syndrome|not_specified	RCV000159501.3|RCV000417402.1	MedGen:OMIM:Orphanet|MedGen	C1856113:235730:ORPHA2152|CN169374
2	178096406	rs141363120	G	A	1094.6	PASS	4	NFE2L2	nonsynonymous SNV	not provided	not_specified	RCV000121654.1	MedGen	CN169374
2	189855743	rs112185887	G	A	522.1	PASS	1	COL3A1	nonsynonymous SNV	other|Likely benign|Likely benign	Ehlers-Danlos_syndrome\x2c_type_4|not_specified|Thoracic_aortic_aneurysm_and_aortic_dissection	RCV000148458.5|RCV000181073.3|RCV000253152.1	MedGen:OMIM:Orphanet:SNOMED_CT|MedGen|MedGen:Orphanet	C0268338:130050:ORPHA286:17025000|CN169374|CN118826:ORPHA91387
2	209108190	rs142801125	T	C	568.3	PASS	1	IDH1	nonsynonymous SNV	not provided	not_specified	RCV000121206.1	MedGen	CN169374
2	209116182	rs142923780	A	C	475.4	PASS	1	IDH1	nonsynonymous SNV	not provided	not_specified	RCV000121202.1	MedGen	CN169374
2	215610562	rs146946984	C	T	563.1	PASS	1	BARD1	nonsynonymous SNV	Uncertain significance\x2cUncertain significance|Likely benign|Uncertain significance|Uncertain significance	Hereditary_cancer-predisposing_syndrome\x2cHereditary_cancer-predisposing_syndrome|Familial_cancer_of_breast|not_specified|Breast_cancer	RCV000129644.2\x2cRCV000115617.6|RCV000197934.4|RCV000212137.2|RCV000330195.1	MedGen:SNOMED_CT\x2cMedGen:SNOMED_CT|MedGen:OMIM:Orphanet:SNOMED_CT|MedGen|MedGen	C0027672:699346009\x2cC0027672:699346009|C0346153:114480:ORPHA227535:254843006|CN169374|CN221572
2	232889039	rs202059499	C	T	404.3	PASS	2	DIS3L2	nonsynonymous SNV	other	Renal_hamartomas_nephroblastomatosis_and_fetal_gigantism	RCV000287903.1	MedGen:OMIM:Orphanet	C0796113:267000:ORPHA2849
3	30713834	rs35766612	G	A	2964.7	PASS	4	TGFBR2	nonsynonymous SNV	Likely benign|Uncertain significance|other|Likely benign|Likely benign\x2cUncertain significance|other|Uncertain significance|Uncertain significance|Uncertain significance	not_specified|Congenital_aneurysm_of_ascending_aorta|Thoracic_aortic_aneurysm_and_aortic_dissection|Loeys-Dietz_syndrome|Marfan_syndrome\x2cLoeys-Dietz_syndrome|not_specified|Thoracic_aortic_aneurysm_and_aortic_dissection|Aneurysm|Ascending_aortic_aneurysm	RCV000037728.4|RCV000148893.1|RCV000249404.2|RCV000288248.1|RCV000345619.1\x2cRCV000030544.2|RCV000152009.2|RCV000249454.1|RCV000414949.1|RCV000414949.1	MedGen|Gene:MedGen:OMIM:Orphanet:SNOMED_CT|MedGen:Orphanet|MedGen:Orphanet:SNOMED_CT|MedGen:OMIM:Orphanet:SNOMED_CT\x2cMedGen:Orphanet:SNOMED_CT|MedGen|MedGen:Orphanet|Human_Phenotype_Ontology:MedGen|Human_Phenotype_Ontology:MedGen	CN169374|252842:C0345050:607086:ORPHA229:253646008|CN118826:ORPHA91387|C2697932:ORPHA60030:446263001|C0024796:154700:ORPHA558:19346006\x2cC2697932:ORPHA60030:446263001|CN169374|CN118826:ORPHA91387|HP:0002617:C0002940|HP:0002631:C0856747
3	70014091	rs149617956	G	A	1139.9	PASS	7	MITF	nonsynonymous SNV	other|Pathogenic|other	Cutaneous_malignant_melanoma_8|Hereditary_cancer-predisposing_syndrome|not_specified	RCV000022661.5|RCV000129682.1|RCV000222278.2	MedGen:OMIM:Orphanet|MedGen:SNOMED_CT|MedGen	C3152204:614456:ORPHA293822|C0027672:699346009|CN169374
3	71027110	rs200355554	G	C	1463.3	PASS	3	FOXP1	nonsynonymous SNV	Likely benign	Intellectual_Disability_with_Language_Impairment_and_Autistic_Features	RCV000309233.1	MedGen	CN239203
3	105378061	rs55821768	G	C	643.1	PASS	1	CBLB	nonsynonymous SNV	not provided	not_specified	RCV000120478.1	MedGen	CN169374
3	142272098	rs141783863	A	G	653.2	PASS	1	ATR	nonsynonymous SNV	Uncertain significance	Seckel_syndrome	RCV000264411.1	MedGen:Orphanet:SNOMED_CT	C0265202:ORPHA808:57917004
3	187446313	rs137878288	G	A	41	PASS	1	BCL6	nonsynonymous SNV	not provided	not_specified	RCV000120203.1	MedGen	CN169374
4	1806131	rs17881656	T	C	1760.6	PASS	10	FGFR3	nonsynonymous SNV	other|Likely benign	not_specified|not_provided	RCV000121079.3|RCV000442867.1	MedGen|MedGen	CN169374|CN221809
4	55972029	rs55716939	C	T	633.1	PASS	2	KDR	nonsynonymous SNV	not provided	not_specified	RCV000121296.1	MedGen	CN169374
5	112102960	rs139196838	C	T	496.7	PASS	1	APC	nonsynonymous SNV	other|Likely benign|other|Likely pathogenic	Familial_adenomatous_polyposis_1|Hereditary_cancer-predisposing_syndrome|not_specified|Colorectal_cancer\x2c_susceptibility_to	RCV000122769.6|RCV000129141.6|RCV000200967.3|RCV000210128.1	MedGen:OMIM|MedGen:SNOMED_CT|MedGen|MedGen	C2713442:175100|C0027672:699346009|CN169374|C1858438
5	112164557	rs144056494	T	C	601.9	PASS	1	APC	nonsynonymous SNV	Uncertain significance|Benign|Uncertain significance|Uncertain significance	not_provided|Hereditary_cancer-predisposing_syndrome|Familial_adenomatous_polyposis_1|not_specified	RCV000034405.1|RCV000131638.5|RCV000168324.5|RCV000211900.2	MedGen|MedGen:SNOMED_CT|MedGen:OMIM|MedGen	CN221809|C0027672:699346009|C2713442:175100|CN169374
5	112174677	rs143638171	T	C	759.4	PASS	7	APC	nonsynonymous SNV	Benign|other|Benign|Benign|Uncertain significance|Likely benign	not_provided|not_specified|Hereditary_cancer-predisposing_syndrome|Familial_adenomatous_polyposis_1|Familial_multiple_polyposis_syndrome|APC-Associated_Polyposis_Disorders	RCV000034384.1|RCV000077988.8|RCV000115083.6|RCV000196915.3|RCV000203169.1|RCV000393833.1	MedGen|MedGen|MedGen:SNOMED_CT|MedGen:OMIM|MedGen:Orphanet:SNOMED_CT|MedGen	CN221809|CN169374|C0027672:699346009|C2713442:175100|C0032580:ORPHA733:72900001|CN239210
5	112174802	rs201830995	C	T	2009.1	PASS	2	APC	nonsynonymous SNV	Likely benign|Likely benign|Likely benign|Benign	not_specified|Hereditary_cancer-predisposing_syndrome|Familial_adenomatous_polyposis_1|Familial_multiple_polyposis_syndrome	RCV000120025.1|RCV000129096.5|RCV000196848.4|RCV000239305.1	MedGen|MedGen:SNOMED_CT|MedGen:OMIM|MedGen:Orphanet:SNOMED_CT	CN169374|C0027672:699346009|C2713442:175100|C0032580:ORPHA733:72900001
5	112178112	rs34919187	C	T	335.1	PASS	1	APC	nonsynonymous SNV	Uncertain significance|Likely benign|other|Likely benign|Likely benign	not_provided|Hereditary_cancer-predisposing_syndrome|Familial_adenomatous_polyposis_1|not_specified|APC-Associated_Polyposis_Disorders	RCV000034396.1|RCV000115115.7|RCV000119123.9|RCV000247116.2|RCV000343531.1	MedGen|MedGen:SNOMED_CT|MedGen:OMIM|MedGen|MedGen	CN221809|C0027672:699346009|C2713442:175100|CN169374|CN239210
5	112178805	rs147549623	G	A	438.4	PASS	3	APC	nonsynonymous SNV	Likely benign|Benign|Likely benign	Hereditary_cancer-predisposing_syndrome|Familial_adenomatous_polyposis_1|not_specified	RCV000115121.7|RCV000119237.7|RCV000200965.4	MedGen:SNOMED_CT|MedGen:OMIM|MedGen	C0027672:699346009|C2713442:175100|CN169374
6	139206888	rs199701983	C	T	442.6	PASS	1	ECT2L	nonsynonymous SNV	not provided	not_specified	RCV000120667.1	MedGen	CN169374
6	139223664	rs374898524	G	A	384.6	PASS	1	ECT2L	nonsynonymous SNV	not provided	not_specified	RCV000120673.1	MedGen	CN169374
6	152454556	rs139834542	A	G	564.6	PASS	3	SYNE1	nonsynonymous SNV	Likely benign|Likely benign|other	Emery-Dreifuss_muscular_dystrophy|Cerebellar_ataxia|not_specified	RCV000304397.1|RCV000363295.1|RCV000364185.2	MedGen	CN169374
6	152461162	rs119103248	C	T	856.2	PASS	2	SYNE1	nonsynonymous SNV	Pathogenic|Uncertain significance|Likely benign|Likely benign	Emery-Dreifuss_muscular_dystrophy_4\x2c_autosomal_dominant|not_specified|Cerebellar_ataxia|Emery-Dreifuss_muscular_dystrophy	RCV000002424.2|RCV000174817.2|RCV000329983.1|RCV000389137.1	MedGen:Orphanet:SNOMED_CT	C0410189:ORPHA261:111508004
6	152545711	rs140962690	A	G	953.6	PASS	1	SYNE1	nonsynonymous SNV	Likely benign|Uncertain significance|Likely benign	Emery-Dreifuss_muscular_dystrophy|not_specified|Cerebellar_ataxia	RCV000309798.1|RCV000326032.1|RCV000395237.1	.	.
6	152615118	rs147998933	A	G	643.2	PASS	2	SYNE1	nonsynonymous SNV	Uncertain significance|Likely benign|Likely benign\x2cUncertain significance	not_specified|Cerebellar_ataxia|Emery-Dreifuss_muscular_dystrophy\x2cnot_specified	RCV000180748.2|RCV000261210.1|RCV000297752.1\x2cRCV000408419.1	MedGen:Orphanet:SNOMED_CT\x2cMedGen	C0410189:ORPHA261:111508004\x2cCN169374
6	152651557	rs41301343	G	A	1106.9	PASS	3	SYNE1	nonsynonymous SNV	Uncertain significance|Likely benign|Likely benign	not_specified|Cerebellar_ataxia|Emery-Dreifuss_muscular_dystrophy	RCV000180075.2|RCV000282267.1|RCV000316351.1	MedGen:Orphanet:SNOMED_CT	C0410189:ORPHA261:111508004
6	152651911	rs142388112	C	T	909.1	PASS	1	SYNE1	nonsynonymous SNV	Likely benign|Uncertain significance|Likely benign	Cerebellar_ataxia|not_specified|Emery-Dreifuss_muscular_dystrophy	RCV000260305.1|RCV000263822.1|RCV000357277.1	MedGen|MedGen:Orphanet:SNOMED_CT	CN169374|C0410189:ORPHA261:111508004
6	152690199	rs149901087	G	C	163.7	PASS	1	SYNE1	nonsynonymous SNV	Likely benign|Uncertain significance|Likely benign	Cerebellar_ataxia|not_specified|Emery-Dreifuss_muscular_dystrophy	RCV000312113.1|RCV000370965.1|RCV000391866.1	MedGen|MedGen:Orphanet:SNOMED_CT	CN169374|C0410189:ORPHA261:111508004
6	152697692	rs117360770	G	C	538.1	PASS	2	SYNE1	nonsynonymous SNV	Likely benign|Likely benign|Likely benign	not_specified|Cerebellar_ataxia|Emery-Dreifuss_muscular_dystrophy	RCV000179213.3|RCV000349953.1|RCV000388054.1	MedGen:Orphanet:SNOMED_CT	C0410189:ORPHA261:111508004
6	152730821	rs577979265	A	G	1431	PASS	1	SYNE1	nonsynonymous SNV	Likely benign|Likely benign|Uncertain significance	Emery-Dreifuss_muscular_dystrophy|Cerebellar_ataxia|not_specified	RCV000297663.1|RCV000343170.1|RCV000379763.1	MedGen	CN169374
6	152762383	rs144566713	C	T	323.3	PASS	2	SYNE1	nonsynonymous SNV	Likely benign|Likely benign|Uncertain significance	Emery-Dreifuss_muscular_dystrophy|Cerebellar_ataxia|not_specified	RCV000268310.1|RCV000320984.1|RCV000336103.1	MedGen	CN169374
7	6031639	rs139438201	T	C	232	PASS	1	PMS2	nonsynonymous SNV	Benign|Likely benign|Benign|other	not_provided|Hereditary_cancer-predisposing_syndrome|Lynch_syndrome|not_specified	RCV000034638.1|RCV000115712.5|RCV000168052.5|RCV000212860.2	MedGen|MedGen:SNOMED_CT|MedGen:Orphanet:SNOMED_CT|MedGen	CN221809|C0027672:699346009|C1333990:ORPHA144:315058005|CN169374
7	6038824	rs374704824	C	T	668.5	PASS	1	PMS2	nonsynonymous SNV	Uncertain significance\x2cUncertain significance|Likely benign|Uncertain significance|Uncertain significance	Lynch_syndrome\x2cHereditary_cancer-predisposing_syndrome|Lynch_syndrome|Colorectal_cancer\x2c_non-polyposis|not_specified	RCV000234307.1\x2cRCV000115699.5|RCV000123090.5|RCV000148736.1|RCV000212845.2	MedGen:Orphanet:SNOMED_CT\x2cMedGen:SNOMED_CT|MedGen:Orphanet:SNOMED_CT|MedGen|MedGen	C1333990:ORPHA144:315058005\x2cC0027672:699346009|C1333990:ORPHA144:315058005|CN221576|CN169374
7	42007201	rs62622373	T	C	5891.5	PASS	4	GLI3	nonsynonymous SNV	Likely benign|Likely benign|Likely benign	not_provided|Greig_cephalopolysyndactyly_syndrome|not_specified	RCV000224342.1|RCV000365837.1|RCV000421865.1	MedGen|MedGen:OMIM:SNOMED_CT|MedGen	CN221809|C0265306:175700:32985001|CN169374
7	91643610	rs139965373	G	A	594.5	PASS	1	AKAP9	nonsynonymous SNV	Likely benign|Likely benign|Uncertain significance|Uncertain significance|Uncertain significance	Ventricular_fibrillation|not_provided|Long_QT_syndrome|Romano-Ward_syndrome|Long_QT_syndrome_11	RCV000157101.1|RCV000171716.1|RCV000233886.2|RCV000302445.1|RCV000477762.1	EFO:MedGen:SNOMED_CT|MedGen|MedGen:SNOMED_CT|MedGen:SNOMED_CT|MedGen:OMIM	EFO_0004287:C0042510:71908006|CN221809|C0023976:9651007|CN119492:20852007|C2678483:611820
7	91667736	rs150379637	A	G	281	PASS	1	AKAP9	nonsynonymous SNV	Likely benign|Uncertain significance|Uncertain significance	not_provided|Cardiovascular_phenotype|Long_QT_syndrome	RCV000171718.1|RCV000243341.1|RCV000475782.1	MedGen|MedGen|MedGen:SNOMED_CT	CN221809|CN230736|C0023976:9651007
7	91674405	rs150016098	T	C	420.3	PASS	1	AKAP9	nonsynonymous SNV	Benign|Likely benign|Likely benign	not_specified|not_provided|Long_QT_syndrome	RCV000123577.4|RCV000171719.1|RCV000456988.1	MedGen|MedGen|MedGen:SNOMED_CT	CN169374|CN221809|C0023976:9651007
7	91694604	rs61757671	G	A	928.7	PASS	1	AKAP9	nonsynonymous SNV	Likely benign|Likely benign|Uncertain significance|Uncertain significance|other	not_provided|Cardiovascular_phenotype|not_specified|Romano-Ward_syndrome|Long_QT_syndrome	RCV000171720.3|RCV000252240.1|RCV000259143.1|RCV000267059.1|RCV000361700.1	MedGen|MedGen|MedGen|MedGen:SNOMED_CT|MedGen:SNOMED_CT	CN221809|CN230736|CN169374|CN119492:20852007|C0023976:9651007
7	91726960	rs61757664	G	A	1326.6	PASS	2	AKAP9	nonsynonymous SNV	Likely benign|Uncertain significance|Uncertain significance|Uncertain significance|Uncertain significance	not_provided|Long_QT_syndrome_11|Cardiovascular_phenotype|Long_QT_syndrome|Romano-Ward_syndrome	RCV000171729.1|RCV000185546.2|RCV000250716.1|RCV000304827.1|RCV000361837.1	MedGen|MedGen:OMIM|MedGen|MedGen:SNOMED_CT|MedGen:SNOMED_CT	CN221809|C2678483:611820|CN230736|C0023976:9651007|CN119492:20852007
7	91727479	rs139046510	A	T	456.6	PASS	2	AKAP9	nonsynonymous SNV	Likely benign|Likely benign|Likely benign|other|Uncertain significance	not_provided|not_specified|Cardiovascular_phenotype|Long_QT_syndrome|Romano-Ward_syndrome	RCV000170642.3|RCV000185490.2|RCV000250287.1|RCV000272838.1|RCV000365126.1	MedGen|MedGen|MedGen|MedGen:SNOMED_CT|MedGen:SNOMED_CT	CN221809|CN169374|CN230736|C0023976:9651007|CN119492:20852007
7	116340177	rs200074800	G	A	301.6	PASS	1	MET	nonsynonymous SNV	other|not provided	Renal_cell_carcinoma\x2c_papillary\x2c_1|not_specified	RCV000119117.8|RCV000121345.1	MedGen:OMIM:Orphanet:SNOMED_CT|MedGen	C0007134:605074:ORPHA217071:41607009|CN169374
7	116411923	rs34589476	C	T	380.9	PASS	1	MET	nonsynonymous SNV	other|Uncertain significance|other|Likely benign|Likely pathogenic	not_provided|not_specified|Renal_cell_carcinoma\x2c_papillary\x2c_1|Hereditary_cancer-predisposing_syndrome|Neoplasm	RCV000034528.7|RCV000121339.2|RCV000123119.7|RCV000131706.2|RCV000444296.1	MedGen|MedGen|MedGen:OMIM:Orphanet:SNOMED_CT|MedGen:SNOMED_CT|MeSH:MedGen:SNOMED_CT	CN221809|CN169374|C0007134:605074:ORPHA217071:41607009|C0027672:699346009|D009369:C0027651:108369006
7	116415124	rs370529693	C	T	1217.8	PASS	1	MET	nonsynonymous SNV	Uncertain significance|Uncertain significance	Renal_cell_carcinoma\x2c_papillary\x2c_1|Hereditary_cancer-predisposing_syndrome	RCV000123121.3|RCV000164064.1	MedGen:OMIM:Orphanet:SNOMED_CT|MedGen:SNOMED_CT	C0007134:605074:ORPHA217071:41607009|C0027672:699346009
7	151949698	rs140919432	G	T	282	PASS	1	KMT2C	nonsynonymous SNV	not provided	not_specified	RCV000121450.1	MedGen	CN169374
8	30948045	rs150148567	A	G	437	PASS	1	WRN	nonsynonymous SNV	Uncertain significance\x2cUncertain significance	Werner_syndrome\x2cWerner_syndrome	RCV000459455.1\x2cRCV000227669.3	MedGen:OMIM:Orphanet:SNOMED_CT\x2cMedGen:OMIM:Orphanet:SNOMED_CT	C0043119:277700:ORPHA902:51626007\x2cC0043119:277700:ORPHA902:51626007
8	31012237	rs78488552	C	G	2296	PASS	9	WRN	nonsynonymous SNV	Uncertain significance|other	not_specified|Werner_syndrome	RCV000122293.2|RCV000231281.3	MedGen|MedGen:OMIM:Orphanet:SNOMED_CT	CN169374|C0043119:277700:ORPHA902:51626007
8	90983460	rs34767364	G	A	1043.4	PASS	5	NBN	nonsynonymous SNV	other|Likely benign|Uncertain significance	Microcephaly\x2c_normal_intelligence_and_immunodeficiency|Hereditary_cancer-predisposing_syndrome|not_specified	RCV000007363.9|RCV000115802.7|RCV000121621.3	MedGen:OMIM:Orphanet:SNOMED_CT|MedGen:SNOMED_CT|MedGen	C0398791:251260:ORPHA647:234638009|C0027672:699346009|CN169374
8	90990521	rs61754966	T	C	900.2	PASS	1	NBN	nonsynonymous SNV	Pathogenic|other|Uncertain significance|Uncertain significance|Benign	Aplastic_anemia|Leukemia\x2c_acute_lymphoblastic\x2c_susceptibility_to|Hereditary_cancer-predisposing_syndrome|not_specified|Microcephaly\x2c_normal_intelligence_and_immunodeficiency	RCV000007360.5|RCV000007361.5|RCV000115797.7|RCV000121618.5|RCV000197512.4	MedGen:OMIM:SNOMED_CT|MedGen|MedGen:SNOMED_CT|MedGen|MedGen:OMIM:Orphanet:SNOMED_CT	C0002874:609135:306058006|C1840513|C0027672:699346009|CN169374|C0398791:251260:ORPHA647:234638009
8	90993640	rs61753720	C	T	868.4	PASS	7	NBN	nonsynonymous SNV	Benign|other|Benign	Hereditary_cancer-predisposing_syndrome|not_specified|Microcephaly\x2c_normal_intelligence_and_immunodeficiency	RCV000115792.6|RCV000121616.4|RCV000123216.6	MedGen:SNOMED_CT|MedGen|MedGen:OMIM:Orphanet:SNOMED_CT	C0027672:699346009|CN169374|C0398791:251260:ORPHA647:234638009
8	119123164	rs199862937	C	T	235.9	PASS	1	EXT1	nonsynonymous SNV	not provided	not_specified	RCV000120870.1	MedGen	CN169374
8	145737123	rs35346077	G	A	528.8	PASS	2	RECQL4	nonsynonymous SNV	not provided|Benign	not_specified|Baller-Gerold_syndrome	RCV000121954.1|RCV000232588.2	MedGen|MedGen:OMIM:Orphanet:SNOMED_CT	CN169374|C0265308:218600:ORPHA1225:77608001
9	289557	rs150742426	G	A	486	PASS	2	DOCK8	nonsynonymous SNV	Uncertain significance	Hyper-IgE_syndrome	RCV000328185.1	MedGen:Orphanet	CN204280:ORPHA331223
9	2191388	rs61736899	G	A	536.8	PASS	3	SMARCA2	nonsynonymous SNV	Likely benign	Nicolaides-Baraitser_syndrome	RCV000358448.1	MedGen:OMIM:Orphanet:SNOMED_CT	C1303073:601358:ORPHA3051:401046009
9	5126715	rs142269166	A	G	629	PASS	11	JAK2	nonsynonymous SNV	not provided	not_specified	RCV000121246.1	MedGen	CN169374
9	98212185	rs113663584	C	T	387.5	PASS	3	PTCH1	nonsynonymous SNV	Uncertain significance|other|Likely benign	not_provided|not_specified|Gorlin_syndrome	RCV000034572.1|RCV000121892.3|RCV000123025.6	MedGen|MedGen|MedGen:OMIM:Orphanet:SNOMED_CT	CN221809|CN169374|C0004779:109400:ORPHA377:69408002
9	98231239	rs570441437	G	A	280.1	PASS	1	PTCH1	nonsynonymous SNV	Uncertain significance	Gorlin_syndrome	RCV000234364.2	MedGen:OMIM:Orphanet:SNOMED_CT	C0004779:109400:ORPHA377:69408002
9	98240378	rs142274954	C	T	268.9	PASS	2	PTCH1	nonsynonymous SNV	Likely benign|Benign|Uncertain significance|Likely benign	not_specified|Gorlin_syndrome|Hirschsprung_disease_1|Anophthalmia_-_microphthalmia	RCV000121906.2|RCV000122998.6|RCV000201284.1|RCV000207385.1	MedGen|MedGen:OMIM:Orphanet:SNOMED_CT|MedGen:OMIM|MedGen	CN169374|C0004779:109400:ORPHA377:69408002|C2931876:142623|CN235161
9	133738340	rs34549764	A	G	611.7	PASS	4	ABL1	nonsynonymous SNV	not provided	not_specified	RCV000119954.1	MedGen	CN169374
9	133759686	rs61746126	A	G	189.3	PASS	1	ABL1	nonsynonymous SNV	not provided	not_specified	RCV000119938.1	MedGen	CN169374
9	135786013	rs118203504	G	A	3452.4	PASS	2	TSC1	nonsynonymous SNV	Likely benign|Likely benign|Likely benign|Likely benign|Likely benign	Tuberous_sclerosis_syndrome|not_specified|Hereditary_cancer-predisposing_syndrome|Tuberous_sclerosis_1|Focal_cortical_dysplasia_of_Taylor	RCV000041998.3|RCV000122186.5|RCV000163452.2|RCV000226529.2|RCV000383299.1	MedGen:Orphanet:SNOMED_CT|MedGen|MedGen:SNOMED_CT|MedGen:OMIM|MedGen:OMIM:Orphanet	C0041341:ORPHA805:7199000|CN169374|C0027672:699346009|C1854465:191100|C1846385:607341:ORPHA268994
9	139401234	rs182330532	G	A	1001.2	PASS	1	NOTCH1	nonsynonymous SNV	Uncertain significance|Uncertain significance	Adams-Oliver_syndrome_5|Cardiovascular_phenotype	RCV000225891.2|RCV000246340.1	MedGen:OMIM|MedGen	CN219575:616028|CN230736
9	139405111	rs201620358	G	A	289.1	PASS	5	NOTCH1	nonsynonymous SNV	Uncertain significance|Likely benign|Likely benign|Uncertain significance	not_specified|Thoracic_aortic_aneurysm_and_aortic_dissection|Adams-Oliver_syndrome_5|Cardiovascular_phenotype	RCV000121671.2|RCV000143938.1|RCV000227340.2|RCV000250404.1	MedGen|MedGen:Orphanet|MedGen:OMIM|MedGen	CN169374|CN118826:ORPHA91387|CN219575:616028|CN230736
10	76789417	rs72803461	G	A	562.7	PASS	3	KAT6B	nonsynonymous SNV	Likely benign|Benign	KAT6B-Related_Spectrum_Disorders|not_specified	RCV000375767.1|RCV000438668.1	MedGen|MedGen	CN239406|CN169374
11	44193165	rs138187791	G	A	1630.5	PASS	4	EXT2	nonsynonymous SNV	not provided|Likely benign	not_specified|Hereditary_Multiple_Osteochondromatosis	RCV000120891.1|RCV000373135.1	MedGen|MedGen	CN169374|CN239374
11	108119823	rs56128736	T	C	980.7	PASS	10	ATM	nonsynonymous SNV	other|Benign|other	Hereditary_cancer-predisposing_syndrome|Ataxia-telangiectasia_syndrome|not_specified	RCV000115136.7|RCV000119195.7|RCV000120171.3	MedGen:SNOMED_CT|MedGen:OMIM:Orphanet:SNOMED_CT|MedGen	C0027672:699346009|C0004135:208900:ORPHA100:68504005|CN169374
11	108121787	rs35963548	G	A	291.9	PASS	1	ATM	nonsynonymous SNV	Uncertain significance|Uncertain significance|Uncertain significance	not_specified|Ataxia-telangiectasia_syndrome|Hereditary_cancer-predisposing_syndrome	RCV000120116.2|RCV000122821.6|RCV000129230.5	MedGen|MedGen:OMIM:Orphanet:SNOMED_CT|MedGen:SNOMED_CT	CN169374|C0004135:208900:ORPHA100:68504005|C0027672:699346009
11	108128246	rs34231402	T	A	759.4	PASS	2	ATM	nonsynonymous SNV	Likely benign|Likely benign|Uncertain significance	Hereditary_cancer-predisposing_syndrome|Ataxia-telangiectasia_syndrome|not_specified	RCV000115152.6|RCV000122834.6|RCV000211979.3	MedGen:SNOMED_CT|MedGen:OMIM:Orphanet:SNOMED_CT|MedGen	C0027672:699346009|C0004135:208900:ORPHA100:68504005|CN169374
11	108160480	rs138327406	T	G	869.2	PASS	1	ATM	nonsynonymous SNV	other|other|Benign	Hereditary_cancer-predisposing_syndrome|not_specified|Ataxia-telangiectasia_syndrome	RCV000115193.7|RCV000120139.4|RCV000122848.6	MedGen:SNOMED_CT|MedGen|MedGen:OMIM:Orphanet:SNOMED_CT	C0027672:699346009|CN169374|C0004135:208900:ORPHA100:68504005
11	108186610	rs11212587	G	A	533.3	PASS	4	ATM	nonsynonymous SNV	Likely benign|other|Likely benign	Hereditary_cancer-predisposing_syndrome|not_specified|Ataxia-telangiectasia_syndrome	RCV000115221.7|RCV000120151.3|RCV000122864.6	MedGen:SNOMED_CT|MedGen|MedGen:OMIM:Orphanet:SNOMED_CT	C0027672:699346009|CN169374|C0004135:208900:ORPHA100:68504005
12	12871180	rs546234840	A	G	187.4	PASS	1	CDKN1B	nonsynonymous SNV	Likely benign|Uncertain significance	Multiple_endocrine_neoplasia|Multiple_endocrine_neoplasia\x2c_type_4	RCV000346316.1|RCV000475865.1	MedGen:Orphanet:SNOMED_CT|MedGen:OMIM:Orphanet	C0027662:ORPHA276161:46724008|C1970712:610755:ORPHA276152
12	46205208	rs140285438	G	A	530.1	PASS	3	ARID2	nonsynonymous SNV	not provided	not_specified	RCV000120087.1	MedGen	CN169374
12	49428694	rs146044282	T	C	3521.5	PASS	7	KMT2D	nonsynonymous SNV	other|Likely benign	not_specified|Kabuki_syndrome	RCV000121420.3|RCV000297958.1	MedGen|MedGen:Orphanet:SNOMED_CT	CN169374|C0796004:ORPHA2322:313426007
12	49443799	rs112236653	G	A	187.7	PASS	1	KMT2D	nonsynonymous SNV	Likely benign|Likely benign|Uncertain significance	not_specified|Kabuki_syndrome|not_provided	RCV000121382.2|RCV000279877.1|RCV000431106.1	MedGen|MedGen:Orphanet:SNOMED_CT|MedGen	CN169374|C0796004:ORPHA2322:313426007|CN221809
12	133219838	rs142508245	C	T	337.9	PASS	2	POLE	nonsynonymous SNV	Likely benign|other	Colorectal_cancer\x2c_susceptibility_to\x2c_12|not_specified	RCV000226333.2|RCV000236616.2	MedGen:OMIM|MedGen	C3554460:615083|CN169374
12	133237569	rs147692158	C	T	430.5	PASS	3	POLE	nonsynonymous SNV	Likely benign|Uncertain significance	Colorectal_cancer\x2c_susceptibility_to\x2c_12|not_specified	RCV000206219.3|RCV000235475.2	MedGen:OMIM|MedGen	C3554460:615083|CN169374
12	133253180	rs139075637	A	T	539	PASS	7	POLE	nonsynonymous SNV	other|Uncertain significance	Colorectal_cancer\x2c_susceptibility_to\x2c_12|not_specified	RCV000206840.4|RCV000255185.2	MedGen:OMIM|MedGen	C3554460:615083|CN169374
12	133257789	rs143626223	G	A	564.7	PASS	2	POLE	nonsynonymous SNV	Likely benign|Uncertain significance	Colorectal_cancer\x2c_susceptibility_to\x2c_12|not_specified	RCV000234674.2|RCV000236828.2	MedGen:OMIM|MedGen	C3554460:615083|CN169374
13	20763366	rs150529554	C	T	996.6	PASS	1	GJB2	nonsynonymous SNV	Likely pathogenic|Likely benign|Likely benign|Likely benign|Likely benign|Likely benign	Non-syndromic_genetic_deafness|Nonsyndromic_Hearing_Loss\x2c_Recessive|Nonsyndromic_Hearing_Loss\x2c_Dominant|Mutilating_keratoderma|Keratitis-Ichthyosis-Deafness_Syndrome|Hystrix-like_ichthyosis_with_deafness	RCV000168672.2|RCV000278504.1|RCV000336897.1|RCV000342849.1|RCV000404731.1|RCV000407574.1	MedGen:Orphanet|MedGen|MedGen|MedGen:OMIM:Orphanet:SNOMED_CT|MedGen|MedGen:OMIM	CN043648:ORPHA87884|CN239439|CN239435|C0265964:124500:ORPHA494:24559001|C0265336|C1865234:602540
13	32907111	rs397507591	AG	A	233.4	PASS	1	BRCA2	frameshift deletion	not provided|Pathogenic	Familial_cancer_of_breast|Breast-ovarian_cancer\x2c_familial_2	RCV000043818.2|RCV000077258.4	MedGen:OMIM:Orphanet:SNOMED_CT|MedGen:OMIM	C0346153:114480:ORPHA227535:254843006|C2675520:612555
13	32937333	rs28897745	A	G	513.3	PASS	1	BRCA2	nonsynonymous SNV	other|other|Benign|other	Breast-ovarian_cancer\x2c_familial_2|Hereditary_breast_and_ovarian_cancer_syndrome|Hereditary_cancer-predisposing_syndrome|not_specified	RCV000031716.7|RCV000045378.7|RCV000129068.2|RCV000160248.3	MedGen:OMIM|MedGen:Orphanet|MedGen:SNOMED_CT|MedGen	C2675520:612555|C0677776:ORPHA145|C0027672:699346009|CN169374
13	32945172	rs11571747	A	C	552.1	PASS	2	BRCA2	nonsynonymous SNV	other|Likely benign|Benign|other|other|Likely benign	Breast-ovarian_cancer\x2c_familial_2|not_provided|Hereditary_cancer-predisposing_syndrome|not_specified|Hereditary_breast_and_ovarian_cancer_syndrome|Fanconi_anemia	RCV000031751.8|RCV000034464.3|RCV000131022.2|RCV000152885.6|RCV000167825.7|RCV000371112.1	MedGen:OMIM|MedGen|MedGen:SNOMED_CT|MedGen|MedGen:Orphanet|MedGen:Orphanet:SNOMED_CT	C2675520:612555|CN221809|C0027672:699346009|CN169374|C0677776:ORPHA145|C0015625:ORPHA84:30575002
13	32953549	rs28897754	G	T	683.9	PASS	3	BRCA2	nonsynonymous SNV	Benign|Likely benign|other\x2cother|other|other|other	not_specified|Hereditary_cancer-predisposing_syndrome|Hereditary_breast_and_ovarian_cancer_syndrome\x2cHereditary_breast_and_ovarian_cancer_syndrome|Breast-ovarian_cancer\x2c_familial_2|not_specified|Hereditary_cancer-predisposing_syndrome	RCV000124011.2|RCV000163136.2|RCV000196478.2\x2cRCV000045642.9|RCV000114008.4|RCV000120366.8|RCV000162603.3	MedGen|MedGen:SNOMED_CT|MedGen:Orphanet\x2cMedGen:Orphanet|MedGen:OMIM|MedGen|MedGen:SNOMED_CT	CN169374|C0027672:699346009|C0677776:ORPHA145\x2cC0677776:ORPHA145|C2675520:612555|CN169374|C0027672:699346009
14	21861869	rs145300090	C	T	461.1	PASS	1	CHD8	nonsynonymous SNV	Uncertain significance	not_specified	RCV000177525.1	MedGen	CN169374
14	92441008	rs141259390	G	A	495.1	PASS	2	TRIP11	nonsynonymous SNV	other	not_specified	RCV000261771.2	MedGen	CN169374
14	94844866	rs61761869	G	A	454	PASS	1	SERPINA1	nonsynonymous SNV	Pathogenic|Pathogenic\x2cPathogenic	Alpha-1-antitrypsin_deficiency|not_provided\x2cAlpha-1-antitrypsin_deficiency	RCV000336993.1|RCV000443069.1\x2cRCV000206411.1	MedGen:OMIM:Orphanet:SNOMED_CT|MedGen\x2cMedGen:OMIM:Orphanet:SNOMED_CT	C0221757:613490:ORPHA60:30188007|CN221809\x2cC0221757:613490:ORPHA60:30188007
14	94849388	rs28931570	G	A	1175.8	PASS	2	SERPINA1	nonsynonymous SNV	other|other|Uncertain significance|Pathogenic|Likely pathogenic	PI_I|Alpha-1-antitrypsin_deficiency|not_specified|Alpha-1-antitrypsin_deficiency|not_provided	RCV000019575.3|RCV000148875.2|RCV000175577.1|RCV000205893.1|RCV000431149.1	MedGen:OMIM:Orphanet:SNOMED_CT|MedGen|MedGen:OMIM:Orphanet:SNOMED_CT|MedGen	C0221757:613490:ORPHA60:30188007|CN169374|C0221757:613490:ORPHA60:30188007|CN221809
14	95574253	rs149242330	C	T	798.7	PASS	5	DICER1	nonsynonymous SNV	not provided|Likely benign|Likely benign	not_specified|DICER1-related_pleuropulmonary_blastoma_cancer_predisposition_syndrome|Pleuropulmonary_blastoma	RCV000120636.1|RCV000226630.2|RCV000301877.1	MedGen|MedGen:OMIM|MedGen:Orphanet	CN169374|CN072455:601200|C1266144:ORPHA64742
14	95590785	rs148758903	G	C	1196.1	PASS	1	DICER1	nonsynonymous SNV	Uncertain significance|Likely benign	DICER1-related_pleuropulmonary_blastoma_cancer_predisposition_syndrome|Pleuropulmonary_blastoma	RCV000231396.2|RCV000263539.1	MedGen:OMIM|MedGen:Orphanet	CN072455:601200|C1266144:ORPHA64742
15	89825056	rs144908351	A	G	599.7	PASS	4	FANCI	nonsynonymous SNV	other	Fanconi_anemia	RCV000228956.3	MedGen:Orphanet:SNOMED_CT	C0015625:ORPHA84:30575002
15	89862296	rs181860632	G	A	185.3	PASS	1	POLG	nonsynonymous SNV	other	not_provided	RCV000188603.3	MedGen	CN221809
15	89866693	rs138457939	T	C	638.2	PASS	1	POLG	nonsynonymous SNV	Uncertain significance|Uncertain significance	not_specified|Progressive_sclerosing_poliodystrophy	RCV000188567.4|RCV000231376.1	MedGen|MedGen:OMIM:Orphanet:SNOMED_CT	CN169374|C0205710:203700:ORPHA726:20415001
15	89868870	rs113994096	G	A	404.9	PASS	5	POLG	nonsynonymous SNV	Pathogenic|Pathogenic|Pathogenic|Uncertain significance|other|Pathogenic|Pathogenic	Mitochondrial_DNA_depletion_syndrome_4B\x2c_MNGIE_type|Mitochondrial_DNA_depletion_syndrome_1_(MNGIE_type)|Cerebellar_ataxia_infantile_with_progressive_external_ophthalmoplegia|not_specified|Progressive_sclerosing_poliodystrophy|Global_developmental_delay|not_provided	RCV000014456.28|RCV000020473.1|RCV000186576.4|RCV000193529.1|RCV000408293.1|RCV000415307.1|RCV000427845.1	MedGen:OMIM|MedGen:OMIM|MedGen:OMIM|MedGen|MedGen:OMIM:Orphanet:SNOMED_CT|Human_Phenotype_Ontology:MedGen|MedGen	C3150914:613662|C0872218:603041|C1850303:258450|CN169374|C0205710:203700:ORPHA726:20415001|HP:0001263:C4020875|CN221809
15	89873337	rs138929605	T	A	494.6	PASS	1	POLG	nonsynonymous SNV	Likely pathogenic|Uncertain significance|Uncertain significance	not_provided|Progressive_sclerosing_poliodystrophy|POLG-Related_Spectrum_Disorders	RCV000188643.2|RCV000231645.2|RCV000396333.1	MedGen|MedGen:OMIM:Orphanet:SNOMED_CT|MedGen	CN221809|C0205710:203700:ORPHA726:20415001|CN239393
15	89876658	rs139599587	G	A	284.4	PASS	1	POLG	nonsynonymous SNV	Uncertain significance|Uncertain significance	not_specified|Progressive_sclerosing_poliodystrophy	RCV000188685.1|RCV000461638.1	MedGen|MedGen:OMIM:Orphanet:SNOMED_CT	CN169374|C0205710:203700:ORPHA726:20415001
15	91290633	rs144706057	T	C	396.3	PASS	4	BLM	nonsynonymous SNV	Uncertain significance|other	not_specified|Bloom_syndrome	RCV000115279.2|RCV000210906.4	MedGen|MedGen:OMIM:Orphanet:SNOMED_CT	CN169374|C0005859:210900:ORPHA125:4434006
15	91308570	rs146077918	C	T	1435.2	PASS	7	BLM	nonsynonymous SNV	Likely benign|other	not_specified|Bloom_syndrome	RCV000115288.3|RCV000172805.1	MedGen|MedGen:OMIM:Orphanet:SNOMED_CT	CN169374|C0005859:210900:ORPHA125:4434006
16	2096239	rs150766139	G	A	2252.3	PASS	2	NTHL1	stopgain	Pathogenic	Familial_adenomatous_polyposis_3	RCV000172911.3	MedGen:OMIM	CN231254:616415
16	2112558	rs45484298	G	A	318.1	PASS	5	TSC2	nonsynonymous SNV	Likely benign|Likely benign|Likely benign|Likely benign|Uncertain significance|other	not_provided|Tuberous_sclerosis_syndrome|not_specified|Hereditary_cancer-predisposing_syndrome|Hirschsprung_disease_1|Tuberous_sclerosis_2	RCV000034643.6|RCV000054863.2|RCV000122204.6|RCV000163424.1|RCV000201296.1|RCV000227708.3	MedGen|MedGen:Orphanet:SNOMED_CT|MedGen|MedGen:SNOMED_CT|MedGen:OMIM|MedGen:OMIM	CN221809|C0041341:ORPHA805:7199000|CN169374|C0027672:699346009|C2931876:142623|C1860707:613254
16	2120487	rs1800729	G	A	552.6	PASS	8	TSC2	nonsynonymous SNV	Benign|Likely benign|other|Benign|Benign	not_provided|Tuberous_sclerosis_syndrome|not_specified|Hereditary_cancer-predisposing_syndrome|Tuberous_sclerosis_2	RCV000034646.5|RCV000054859.2|RCV000122209.6|RCV000129673.2|RCV000204294.3	MedGen|MedGen:Orphanet:SNOMED_CT|MedGen|MedGen:SNOMED_CT|MedGen:OMIM	CN221809|C0041341:ORPHA805:7199000|CN169374|C0027672:699346009|C1860707:613254
16	2124321	rs45517238	C	A	273.8	PASS	2	TSC2	nonsynonymous SNV	Likely benign|Likely benign|Likely benign|other|Benign	not_provided|Tuberous_sclerosis_syndrome|Hereditary_cancer-predisposing_syndrome|not_specified|Tuberous_sclerosis_2	RCV000034649.4|RCV000054857.2|RCV000163390.1|RCV000176271.3|RCV000204134.3	MedGen|MedGen:Orphanet:SNOMED_CT|MedGen:SNOMED_CT|MedGen|MedGen:OMIM	CN221809|C0041341:ORPHA805:7199000|C0027672:699346009|CN169374|C1860707:613254
16	2138096	rs45517391	C	T	722.3	PASS	1	TSC2	nonsynonymous SNV	Likely benign|Benign|Likely benign	Tuberous_sclerosis_syndrome|not_specified|Tuberous_sclerosis_2	RCV000043179.3|RCV000189943.3|RCV000229384.2	MedGen:Orphanet:SNOMED_CT|MedGen|MedGen:OMIM	C0041341:ORPHA805:7199000|CN169374|C1860707:613254
16	2138570	rs45517423	C	T	809.4	PASS	3	TSC2	nonsynonymous SNV	Likely benign|Likely benign|not provided|not provided|Uncertain significance|Uncertain significance|other|Benign	not_provided|Tuberous_sclerosis_syndrome|Lymphangiomyomatosis|Tuberous_sclerosis_syndrome|Tuberous_sclerosis_and_lymphangiomyomatosis|Hereditary_cancer-predisposing_syndrome|not_specified|Tuberous_sclerosis_2	RCV000034665.4|RCV000054862.2|RCV000055245.1|RCV000055245.1|RCV000148917.1|RCV000163344.1|RCV000178483.3|RCV000204788.3	MedGen|MedGen:Orphanet:SNOMED_CT|MedGen:OMIM:Orphanet:SNOMED_CT|MedGen:Orphanet:SNOMED_CT|MedGen|MedGen:SNOMED_CT|MedGen|MedGen:OMIM	CN221809|C0041341:ORPHA805:7199000|C0751674:606690:ORPHA538:73017001|C0041341:ORPHA805:7199000|CN221561|C0027672:699346009|CN169374|C1860707:613254
16	3820773	rs142047649	G	A	324.3	PASS	1	CREBBP	nonsynonymous SNV	Benign|Likely benign	not_specified|not_provided	RCV000081040.6|RCV000429335.1	MedGen|MedGen	CN169374|CN221809
16	9857574	rs145063086	G	C	644.6	PASS	1	GRIN2A	nonsynonymous SNV	other|Likely benign|Uncertain significance	not_specified|Epilepsy\x2c_focal\x2c_with_speech_disorder_and_with_or_without_mental_retardation|Focal_epilepsy	RCV000187665.5|RCV000309897.1|RCV000417003.1	MedGen|MedGen:OMIM|MedGen:SNOMED_CT	CN169374|C1832814:245570|C0014547:29753000
16	15814814	rs111854563	G	A	732.4	PASS	2	MYH11	nonsynonymous SNV	Likely benign|Uncertain significance|Likely benign	Thoracic_aortic_aneurysm_and_aortic_dissection|not_specified|Aortic_aneurysm\x2c_familial_thoracic_4	RCV000157333.3|RCV000212723.2|RCV000473652.1	MedGen:Orphanet|MedGen|MedGen:OMIM	CN118826:ORPHA91387|CN169374|C1851504:132900
16	15814883	rs137934837	C	T	742.4	PASS	6	MYH11	nonsynonymous SNV	Uncertain significance|other|Likely benign	Thoracic_aortic_aneurysm_and_aortic_dissection|Aortic_aneurysm\x2c_familial_thoracic_4|not_specified	RCV000157332.4|RCV000227161.3|RCV000417390.1	MedGen:Orphanet|MedGen:OMIM|MedGen	CN118826:ORPHA91387|C1851504:132900|CN169374
16	15818143	rs112467954	C	T	1937.8	PASS	3	MYH11	nonsynonymous SNV	Uncertain significance|Uncertain significance|Uncertain significance	not_specified|Thoracic_aortic_aneurysm_and_aortic_dissection|Aortic_aneurysm\x2c_familial_thoracic_4	RCV000182517.3|RCV000252216.1|RCV000466453.1	MedGen|MedGen:Orphanet|MedGen:OMIM	CN169374|CN118826:ORPHA91387|C1851504:132900
16	15818780	rs7196804	C	T	932.9	PASS	2	MYH11	nonsynonymous SNV	Benign|Uncertain significance|Likely benign|Likely benign	Thoracic_aortic_aneurysm_and_aortic_dissection|Lissencephaly\x2c_Recessive|not_specified|Aortic_aneurysm\x2c_familial_thoracic_4	RCV000182512.3|RCV000398079.1|RCV000417389.1|RCV000459113.1	MedGen:Orphanet|MedGen|MedGen|MedGen:OMIM	CN118826:ORPHA91387|CN239458|CN169374|C1851504:132900
16	15844048	rs111404182	G	A	339.2	PASS	1	MYH11	nonsynonymous SNV	Uncertain significance|Uncertain significance	Aortic_aneurysm\x2c_familial_thoracic_4|Thoracic_aortic_aneurysm_and_aortic_dissection	RCV000148694.2|RCV000252564.1	MedGen:OMIM|MedGen:Orphanet	C1851504:132900|CN118826:ORPHA91387
16	15872688	rs150759461	G	A	333.1	PASS	1	MYH11	nonsynonymous SNV	Likely benign|Uncertain significance|other|Likely benign|Uncertain significance	Altered_myosin_contractile_function|Loeys-Dietz_syndrome|not_specified|Aortic_aneurysm\x2c_familial_thoracic_4|Thoracic_aortic_aneurysm_and_aortic_dissection	RCV000148692.1|RCV000157329.1|RCV000182546.3|RCV000206298.3|RCV000251088.1	MedGen|MedGen:Orphanet:SNOMED_CT|MedGen|MedGen:OMIM|MedGen:Orphanet	CN221557|C2697932:ORPHA60030:446263001|CN169374|C1851504:132900|CN118826:ORPHA91387
16	23635348	rs45478192	A	C	354.2	PASS	2	PALB2	nonsynonymous SNV	other|Uncertain significance|other|Likely benign|other	Familial_cancer_of_breast|Pancreatic_cancer_3|Hereditary_cancer-predisposing_syndrome|Fanconi_anemia|not_specified	RCV000114561.8|RCV000114562.1|RCV000116092.7|RCV000306515.1|RCV000417395.1	MedGen:OMIM:Orphanet:SNOMED_CT|MedGen:OMIM|MedGen:SNOMED_CT|MedGen:Orphanet:SNOMED_CT|MedGen	C0346153:114480:ORPHA227535:254843006|C3150547:613348|C0027672:699346009|C0015625:ORPHA84:30575002|CN169374
16	67670682	rs145727304	C	T	318.7	PASS	4	CTCF	nonsynonymous SNV	Uncertain significance|Likely benign	not_specified|not_provided	RCV000193895.1|RCV000427860.1	MedGen|MedGen	CN169374|CN221809
17	29679412	rs148154172	C	T	481.7	PASS	1	NF1	nonsynonymous SNV	Uncertain significance|Likely benign|Likely benign	not_provided|Hereditary_cancer-predisposing_syndrome|Neurofibromatosis\x2c_type_1	RCV000034590.1|RCV000130730.3|RCV000199269.3	MedGen|MedGen:SNOMED_CT|MedGen:OMIM:Orphanet:SNOMED_CT	CN221809|C0027672:699346009|C0027831:162200:ORPHA636:92824003
17	37872145	rs142456637	C	T	464.1	PASS	2	ERBB2	nonsynonymous SNV	not provided	not_specified	RCV000120740.1	MedGen	CN169374
17	48263206	rs147266928	T	C	369.7	PASS	1	COL1A1	nonsynonymous SNV	Likely benign	not_specified	RCV000424654.1	MedGen	CN169374
17	48270048	rs113950465	C	T	230.5	PASS	1	COL1A1	nonsynonymous SNV	Uncertain significance|Uncertain significance	Osteogenesis_imperfecta|not_specified	RCV000029561.1|RCV000287253.2	MeSH:MedGen:Orphanet:SNOMED_CT|MedGen	D010013:C0029434:ORPHA666:78314001|CN169374
17	59761413	rs878855150	C	CTTTG	212.1	PASS	1	BRIP1	frameshift insertion	Likely pathogenic|Likely pathogenic	Familial_cancer_of_breast|Fanconi_anemia\x2c_complementation_group_J	RCV000233395.1|RCV000233395.1	MedGen:OMIM:Orphanet:SNOMED_CT|MedGen:OMIM	C0346153:114480:ORPHA227535:254843006|C1836860:609054
17	59885856	rs28997570	T	C	1317.9	PASS	2	BRIP1	nonsynonymous SNV	Benign|Likely benign|Likely benign|Likely benign|Likely benign|Likely benign	Hereditary_cancer-predisposing_syndrome|not_specified|Familial_cancer_of_breast|Fanconi_anemia\x2c_complementation_group_J|Neoplasm_of_ovary|Fanconi_anemia\x2c_complementation_group_J	RCV000116167.6|RCV000120408.5|RCV000123367.6|RCV000123367.6|RCV000410013.1|RCV000412293.1	MedGen:SNOMED_CT|MedGen|MedGen:OMIM:Orphanet:SNOMED_CT|MedGen:OMIM|Gene:MedGen:OMIM:SNOMED_CT|MedGen:OMIM	C0027672:699346009|CN169374|C0346153:114480:ORPHA227535:254843006|C1836860:609054|6765:C0919267:167000:123843001|C1836860:609054
17	63526198	rs140344858	C	T	459.4	PASS	1	AXIN2	nonsynonymous SNV	Uncertain significance|Likely benign	not_specified|Oligodontia-colorectal_cancer_syndrome	RCV000115877.4|RCV000226193.2	MedGen|MedGen:OMIM:Orphanet	CN169374|C1837750:608615:ORPHA300576
17	63532528	rs138287857	G	A	249.8	PASS	1	AXIN2	nonsynonymous SNV	Uncertain significance|Likely benign	not_specified|Oligodontia-colorectal_cancer_syndrome	RCV000115873.5|RCV000234519.3	MedGen|MedGen:OMIM:Orphanet	CN169374|C1837750:608615:ORPHA300576
17	63534353	rs139871607	T	C	229.8	PASS	1	AXIN2	nonsynonymous SNV	Uncertain significance|Likely benign|Uncertain significance|Uncertain significance	not_specified|Oligodontia-colorectal_cancer_syndrome|Colorectal_cancer|Oligodontia	RCV000115866.5|RCV000227795.3|RCV000417356.1|RCV000417356.1	MedGen|MedGen:OMIM:Orphanet|MedGen|Human_Phenotype_Ontology:MedGen	CN169374|C1837750:608615:ORPHA300576|CN221574|HP:0000677:CN000637
17	63554116	rs201531372	G	A	1391.8	PASS	1	AXIN2	nonsynonymous SNV	Uncertain significance|other	not_specified|Oligodontia-colorectal_cancer_syndrome	RCV000115879.5|RCV000228466.3	MedGen|MedGen:OMIM:Orphanet	CN169374|C1837750:608615:ORPHA300576
17	66518940	rs200069356	G	A	630.7	PASS	2	PRKAR1A	nonsynonymous SNV	Likely benign|Likely benign|Likely benign	Carney_complex\x2c_type_1|Carney_complex|Acrodysostosis	RCV000233943.2|RCV000327381.1|RCV000384218.1	MedGen:OMIM|MedGen:Orphanet|MedGen:Orphanet:SNOMED_CT	C2607929:160980|C0406810:ORPHA1359|C0220659:ORPHA950:66758006
19	1226555	rs200078204	C	T	268.6	PASS	1	STK11	nonsynonymous SNV	Likely benign|Likely benign|other	Hereditary_cancer-predisposing_syndrome|Peutz-Jeghers_syndrome|not_specified	RCV000115596.7|RCV000200450.5|RCV000213035.5	MedGen:SNOMED_CT|MeSH:MedGen:OMIM:Orphanet:SNOMED_CT|MedGen	C0027672:699346009|D010580:C0031269:175200:ORPHA2869:54411001|CN169374
19	4090612	rs117945277	G	A	326.3	PASS	1	MAP2K2	nonsynonymous SNV	Uncertain significance	not_specified	RCV000269273.1	MedGen	CN169374
19	17945708	rs146837396	C	G	320.2	PASS	4	JAK3	nonsynonymous SNV	not provided|Uncertain significance	not_specified|Severe_Combined_Immune_Deficiency	RCV000121261.1|RCV000352396.1	MedGen|MedGen	CN169374|CN239264
19	17947980	rs193922361	G	A	421.9	PASS	1	JAK3	nonsynonymous SNV	Likely pathogenic	Severe_combined_immunodeficiency_disease	RCV000030087.1	MeSH:MedGen:Orphanet:SNOMED_CT	D016511:C0085110:ORPHA183660:31323000
19	50905173	rs41563714	C	T	663.7	PASS	2	POLD1	nonsynonymous SNV	Uncertain significance|Uncertain significance	Colorectal_cancer_10|not_specified	RCV000230582.2|RCV000255386.1	Gene:MedGen:OMIM|MedGen	100271691:C2675481:612591|CN169374
19	50917023	rs145473716	G	A	310.7	PASS	1	POLD1	nonsynonymous SNV	other|Likely benign|Likely benign	Colorectal_cancer_10|Hereditary_cancer-predisposing_syndrome|not_specified	RCV000206687.2|RCV000210771.1|RCV000217194.2	Gene:MedGen:OMIM|MedGen:SNOMED_CT|MedGen	100271691:C2675481:612591|C0027672:699346009|CN169374
20	50407735	rs143818932	A	C	633.5	PASS	2	SALL4	nonsynonymous SNV	Likely benign|Uncertain significance	SALL4-Related_Spectrum_Disorders|not_specified	RCV000315629.1|RCV000391761.1	MedGen|MedGen	CN239401|CN169374
22	19222211	rs199652160	C	T	1574.8	PASS	2	CLTCL1	nonsynonymous SNV	other	not_provided	RCV000413114.2	MedGen	CN221809
22	36682873	rs142094977	A	G	1069.2	PASS	4	MYH9	nonsynonymous SNV	Uncertain significance|Likely benign|Likely benign	not_specified|MYH9-related_disorder|Nonsyndromic_Hearing_Loss\x2c_Dominant	RCV000037565.2|RCV000338710.1|RCV000392887.1	MedGen|MedGen|MedGen	CN169374|CN239288|CN239435
22	36685292	rs139134727	G	A	963.4	PASS	6	MYH9	nonsynonymous SNV	other|Likely benign|Likely benign	not_specified|MYH9-related_disorder|Nonsyndromic_Hearing_Loss\x2c_Dominant	RCV000151329.2|RCV000293752.1|RCV000348717.1	MedGen|MedGen|MedGen	CN169374|CN239288|CN239435
22	36745275	rs56200894	G	C	2023	PASS	7	MYH9	nonsynonymous SNV	Benign|Likely benign|Likely benign	not_specified|MYH9-related_disorder|Nonsyndromic_Hearing_Loss\x2c_Dominant	RCV000155187.1|RCV000298717.1|RCV000369754.1	MedGen|MedGen|MedGen	CN169374|CN239288|CN239435
X	39932564	rs144722432	C	T	909.1	PASS	1	BCOR	nonsynonymous SNV	other	not_specified	RCV000193574.2	MedGen	CN169374
X	147030322	rs45540244	C	T	1718.4	PASS	1	FMR1	nonsynonymous SNV	Benign	not_specified	RCV000079964.4	MedGen	CN169374
