# Supplementary material for: Detection of Rare Germline Variants in the Genomes of B Cell Neoplasms
Source: Preprints.org preprint supplement (doi:10.20944/preprints202101.0330.v1), 2021-01-18
Supplement: Supplementary file 10 [file Supplementary Table 7.xlsx]

## Sheet: Sheet1
CHROM	POS	ID	REF	ALT	N. cases	Mutation Type	Inheritance Pattern	Gene
1	45797157	rs144079536	G	T	1	nonsynonymous SNV	AR	MUTYH
1	45798475	rs34612342	T	C	2	nonsynonymous SNV	AR	MUTYH
1	155205634	rs76763715	T	C	6	nonsynonymous SNV	AR	GBA
1	156830742	rs201472270	C	T	2	nonsynonymous SNV	AD	NTRK1
1	156843439	rs137979116	C	A	2	nonsynonymous SNV	AD	NTRK1
1	156843710	.	T	C	1	nonsynonymous SNV	AD	NTRK1
1	156844733	.	C	A	1	stopgain	AD	NTRK1
2	29416170	rs370701220	C	CT	1	frameshift insertion	AD	ALK
2	29445238	.	C	G	1	nonsynonymous SNV	AD	ALK
2	39212969	.	G	T	1	nonsynonymous SNV	AD	SOS1
2	39262418	.	A	G	1	nonsynonymous SNV	AD	SOS1
2	39283965	.	T	C	1	nonsynonymous SNV	AD	SOS1
2	47606096	rs542435897	A	T	1	nonsynonymous SNV	AD	EPCAM
2	47613735	.	A	T	1	nonsynonymous SNV	AD	EPCAM
2	48027580	.	A	G	1	nonsynonymous SNV	AD	MSH6
2	48033423	rs147453999	A	T	1	nonsynonymous SNV	AD	MSH6
2	48033741	.	A	T	1	stopgain	AD	MSH6
2	48033995	.	T	C	1	nonsynonymous SNV	AD	MSH6
2	128028933	.	G	A	1	nonsynonymous SNV	AR	ERCC3
2	169801117	rs952745163	C	T	1	nonsynonymous SNV	AR	ABCB11
2	169833127	rs147522210	T	C	1	nonsynonymous SNV	AR	ABCB11
2	232889039	rs202059499	C	T	2	nonsynonymous SNV	AR	DIS3L2
3	10094144	.	C	T	1	nonsynonymous SNV	AR	FANCD2
3	10107089	rs146509445	C	T	1	nonsynonymous SNV	AR	FANCD2
3	10127543	.	T	A	1	nonsynonymous SNV	AR	FANCD2
3	14188863	rs751767428	G	A	2	nonsynonymous SNV	AR	XPC
3	14188864	.	C	G	1	nonsynonymous SNV	AR	XPC
3	14199602	rs147900621	C	T	2	nonsynonymous SNV	AR	XPC
3	14199784	rs977308365	C	G	1	nonsynonymous SNV	AR	XPC
3	69928307	.	G	A	1	nonsynonymous SNV	AD	MITF
3	70008500	.	C	T	2	nonsynonymous SNV	AD	MITF
3	70014091	rs149617956	G	A	7	nonsynonymous SNV	AD	MITF
4	1806131	rs17881656	T	C	10	nonsynonymous SNV	AD	FGFR3
4	41750395	.	T	G	1	nonsynonymous SNV	AD	PHOX2B
5	112102960	rs139196838	C	T	1	nonsynonymous SNV	AD	APC
5	112164557	rs144056494	T	C	1	nonsynonymous SNV	AD	APC
5	112174677	rs143638171	T	C	7	nonsynonymous SNV	AD	APC
5	112174802	rs201830995	C	T	2	nonsynonymous SNV	AD	APC
5	112175423	.	C	G	1	nonsynonymous SNV	AD	APC
5	112178112	rs34919187	C	T	1	nonsynonymous SNV	AD	APC
5	112178805	rs147549623	G	A	3	nonsynonymous SNV	AD	APC
5	176562601	rs1321096753	C	G	1	nonsynonymous SNV	AD	NSD1
5	176700765	.	C	T	1	nonsynonymous SNV	AD	NSD1
5	176722179	.	G	C	1	nonsynonymous SNV	AD	NSD1
5		rs1486029151	G	C	1	nonsynonymous SNV	AD	NSD1
6	43550796	rs1360464485	T	C	1	nonsynonymous SNV	AR	POLH
6	43571679	rs147712217	T	C	1	nonsynonymous SNV	AR	POLH
6	43581878	.	CCT	C	2	frameshift deletion	AR	POLH
7	6031639	rs139438201	T	C	1	nonsynonymous SNV	AD	PMS2
7	6038824	rs374704824	C	T	1	nonsynonymous SNV	AD	PMS2
7	42005685	.	C	G	1	nonsynonymous SNV	AD	GLI3
7	42007201	rs62622373	T	C	4	nonsynonymous SNV	AD	GLI3
7	42007279	.	C	A	1	nonsynonymous SNV	AD	GLI3
7	42011991	rs979364849	G	A	1	nonsynonymous SNV	AD	GLI3
7	55220286	.	A	C	1	nonsynonymous SNV	AD	EGFR
7	55259442	.	G	A	1	nonsynonymous SNV	AD	EGFR
7	55269020	rs182857647	C	T	1	nonsynonymous SNV	AD	EGFR
7	66459273	rs120074160	T	A	1	stopgain	AR	SBDS
7	66460298	rs548436732	A	G	1	nonsynonymous SNV	AR	SBDS
7	116339677	.	T	A	1	nonsynonymous SNV	AD	MET
7	116340177	rs200074800	G	A	1	nonsynonymous SNV	AD	MET
7	116371911	.	C	A	1	nonsynonymous SNV	AD	MET
7	116411923	rs34589476	C	T	1	nonsynonymous SNV	AD	MET
7	116415124	rs370529693	C	T	1	nonsynonymous SNV	AD	MET
7	116436003	.	TG	T	1	frameshift deletion	AD	MET
7	140439694	.	C	T	1	nonsynonymous SNV	AD	BRAF
8	30922465	.	T	G	1	nonsynonymous SNV	AR	WRN
8	30922580	.	G	A	1	splice_donor	AR	WRN
8	30948045	rs150148567	A	G	1	nonsynonymous SNV	AR	WRN
8	30948355	.	G	T	1	stopgain	AR	WRN
8	30954292	rs569266355	A	G	1	nonsynonymous SNV	AR	WRN
8	31012237	rs78488552	C	G	9	nonsynonymous SNV	AR	WRN
8	90983460	rs34767364	G	A	5	nonsynonymous SNV	AR	NBN
8	90990521	rs61754966	T	C	1	nonsynonymous SNV	AR	NBN
8	90993640	rs61753720	C	T	7	nonsynonymous SNV	AR	NBN
8	118830766	.	T	C	1	nonsynonymous SNV	AD	EXT1
8	118831914	.	C	G	1	splice_donor	AD	EXT1
8	119122484	.	C	G	1	nonsynonymous SNV	AD	EXT1
8	119123164	rs199862937	C	T	1	nonsynonymous SNV	AD	EXT1
8	145737123	rs35346077	G	A	2	nonsynonymous SNV	AR	RECQL4
8	145737811	.	G	C	1	nonsynonymous SNV	AR	RECQL4
8	145738323	rs1406641581	G	A	1	stopgain	AR	RECQL4
8	145741905	.	C	A	1	nonsynonymous SNV	AR	RECQL4
9	289557	rs150742426	G	A	2	nonsynonymous SNV	AR	DOCK8
9	328041	rs778114411	G	A	1	nonsynonymous SNV	AR	DOCK8
9	328077	rs191413750	G	A	5	nonsynonymous SNV	AR	DOCK8
9	399200	.	C	G	1	nonsynonymous SNV	AR	DOCK8
9	406975	.	A	G	1	nonsynonymous SNV	AR	DOCK8
9	418135	rs772645098	C	G	1	nonsynonymous SNV	AR	DOCK8
9	432197	.	T	A	1	nonsynonymous SNV	AR	DOCK8
9	2056721	.	C	T	1	nonsynonymous SNV	AR	SMARCA2
9	2161782	.	G	A	1	nonsynonymous SNV	AR	SMARCA2
9	2191312	.	A	C	1	nonsynonymous SNV	AR	SMARCA2
9	2191388	rs61736899	G	A	3	nonsynonymous SNV	AR	SMARCA2
9	21854663	rs541314246	C	T	1	nonsynonymous SNV	AD	MTAP
9	98212185	rs113663584	C	T	3	nonsynonymous SNV	AD	PTCH1
9	98231239	rs570441437	G	A	1	nonsynonymous SNV	AD	PTCH1
9	98240378	rs142274954	C	T	2	nonsynonymous SNV	AD	PTCH1
9	98268854	.	G	C	1	nonsynonymous SNV	AD	PTCH1
9	100451852	rs574811302	A	G	1	nonsynonymous SNV	AR	XPA
9	135776211	.	T	C	1	nonsynonymous SNV	AD	TSC1
9	135786013	rs118203504	G	A	2	nonsynonymous SNV	AD	TSC1
10	43609063	.	G	C	1	nonsynonymous SNV	AD	RET
10	88681437	rs35619497	C	T	1	nonsynonymous SNV	AD	BMPR1A
10	104353782	rs1403040084	G	A	1	nonsynonymous SNV	AD	SUFU
10	123263356	.	C	T	1	nonsynonymous SNV	AD	FGFR2
10	123325096	.	G	C	1	nonsynonymous SNV	AD	FGFR2
11	44193165	rs138187791	G	A	4	nonsynonymous SNV	AD	EXT2
11	44265743	.	C	T	1	nonsynonymous SNV	AD	EXT2
11	47256317	.	C	T	1	nonsynonymous SNV	AR	DDB2
11	47259415	.	A	G	1	nonsynonymous SNV	AR	DDB2
11	71146480	rs371873032	G	A	2	nonsynonymous SNV	AR	DHCR7
11	71146761	rs200539324	C	T	1	nonsynonymous SNV	AR	DHCR7
11	71148959	rs565893436	C	T	1	nonsynonymous SNV	AR	DHCR7
11	94209552	.	T	C	1	nonsynonymous SNV	AR	MRE11A
11	108106417	.	C	T	1	stopgain	AR	ATM
11	108115566	.	CT	C	1	frameshift deletion	AR	ATM
11	108119823	rs56128736	T	C	10	nonsynonymous SNV	AR	ATM
11	108121787	rs35963548	G	A	1	nonsynonymous SNV	AR	ATM
11	108128246	rs34231402	T	A	2	nonsynonymous SNV	AR	ATM
11	108141789	rs1060501703	A	G	1	splice_acceptor	AR	ATM
11	108143329	.	C	T	1	nonsynonymous SNV	AR	ATM
11	108159720	.	C	T	1	nonsynonymous SNV	AR	ATM
11	108160480	rs138327406	T	G	1	nonsynonymous SNV	AR	ATM
11	108186610	rs11212587	G	A	4	nonsynonymous SNV	AR	ATM
11	108196075	.	A	T	1	nonsynonymous SNV	AR	ATM
11	108205787	rs1064793406	TAA	T	1	frameshift deletion	AR	ATM
11	108235906	.	C	T	1	nonsynonymous SNV	AR	ATM
11	108236070	.	CAACAAAGTAGCTGAACGTGTCTTAATGA	C	1	frameshift deletion	AR	ATM
12	12871180	rs546234840	A	G	1	nonsynonymous SNV	AD	CDKN1B
12	25368451	rs368557003	T	C	1	nonsynonymous SNV	AD	KRAS
12	111856588	rs111360561	C	A	2	nonsynonymous SNV	AR	SH2B3
12	111885304	rs559278672	C	T	1	nonsynonymous SNV	AR	SH2B3
12	111885815	rs537932422	CTCCCTTCCTCACTGGGATTCAGAG	C	2	nonframeshift deletion	AR	SH2B3
12	133219838	rs142508245	C	T	2	nonsynonymous SNV	AD	POLE
12	133237569	rs147692158	C	T	3	nonsynonymous SNV	AD	POLE
12	133240981	.	C	G	1	nonsynonymous SNV	AD	POLE
12	133252043	.	G	C	1	nonsynonymous SNV	AD	POLE
12	133253180	rs139075637	A	T	7	nonsynonymous SNV	AD	POLE
12	133257789	rs143626223	G	A	2	nonsynonymous SNV	AD	POLE
13	20763366	rs150529554	C	T	1	nonsynonymous SNV	AD	GJB2
13	20763599	rs866127155	T	C	1	nonsynonymous SNV	AD	GJB2
13	32907111	rs397507591	AG	A	1	frameshift deletion	AD	BRCA2
13	32937333	rs28897745	A	G	1	nonsynonymous SNV	AD	BRCA2
13	32945172	rs11571747	A	C	2	nonsynonymous SNV	AD	BRCA2
13	32953549	rs28897754	G	T	3	nonsynonymous SNV	AD	BRCA2
13	103525679	.	C	G	1	nonsynonymous SNV	AR	ERCC5
14	45667921	rs144567652	C	T	3	stopgain	AR	FANCM
14	45668099	.	T	C	1	nonsynonymous SNV	AR	FANCM
14	45669156	.	A	G	1	nonsynonymous SNV	AR	FANCM
14	94844866	rs61761869	G	A	1	nonsynonymous SNV	AR	SERPINA1
14	94844967	rs796549685	T	A	2	nonsynonymous SNV	AR	SERPINA1
14	94845829	rs796680542	G	C	2	nonsynonymous SNV	AR	SERPINA1
14	94848947	.	T	A	1	nonsynonymous SNV	AR	SERPINA1
14	94849388	rs28931570	G	A	2	nonsynonymous SNV	AR	SERPINA1
14	95557579	.	C	G	1	nonsynonymous SNV	AD	DICER1
14	95574253	rs149242330	C	T	5	nonsynonymous SNV	AD	DICER1
14	95582948	.	T	C	1	nonsynonymous SNV	AD	DICER1
14	95590785	rs148758903	G	C	1	nonsynonymous SNV	AD	DICER1
15	80450417	.	G	A	1	nonsynonymous SNV	AR	FAH
15	80460400	rs144234072	C	A	1	nonsynonymous SNV	AR	FAH
15	89825056	rs144908351	A	G	4	nonsynonymous SNV	AR	FANCI
15	91290633	rs144706057	T	C	4	nonsynonymous SNV	AR	BLM
15	91308570	rs146077918	C	T	7	nonsynonymous SNV	AR	BLM
15	91358499	.	C	T	1	nonsynonymous SNV	AR	BLM
16	2112537	.	T	G	1	nonsynonymous SNV	AD	TSC2
16	2112558	rs45484298	G	A	5	nonsynonymous SNV	AD	TSC2
16	2120487	rs1800729	G	A	8	nonsynonymous SNV	AD	TSC2
16	2124321	rs45517238	C	A	2	nonsynonymous SNV	AD	TSC2
16	2136279	.	A	T	1	nonsynonymous SNV	AD	TSC2
16	2137933	rs184892282	T	C	1	nonsynonymous SNV	AD	TSC2
16	2138096	rs45517391	C	T	1	nonsynonymous SNV	AD	TSC2
16	2138570	rs45517423	C	T	3	nonsynonymous SNV	AD	TSC2
16	3640145	.	T	G	1	nonsynonymous SNV	AR	SLX4
16	3820773	rs142047649	G	A	1	nonsynonymous SNV	AD	CREBBP
16	14022003	rs141101671	G	A	1	nonsynonymous SNV	AR	ERCC4
16	14038627	.	A	G	1	nonsynonymous SNV	AR	ERCC4
16	14041608	.	A	G	1	nonsynonymous SNV	AR	ERCC4
16	23635348	rs45478192	A	C	2	nonsynonymous SNV	AD	PALB2
16	23637676	.	A	G	1	nonsynonymous SNV	AD	PALB2
16	50813603	.	C	T	1	nonsynonymous SNV	AD	CYLD
16	68847228	.	G	A	1	nonsynonymous SNV	AD	CDH1
16	68847305	.	G	C	1	nonsynonymous SNV	AD	CDH1
16	89813080	.	C	T	1	nonsynonymous SNV	AR	FANCA
16	89845385	.	G	T	1	nonsynonymous SNV	AR	FANCA
17	17125849	rs747429545	T	G	1	nonsynonymous SNV	AD	FLCN
17	29676209	.	A	T	1	nonsynonymous SNV	AD	NF1
17	29679412	rs148154172	C	T	1	nonsynonymous SNV	AD	NF1
17	29701073	.	A	G	1	nonsynonymous SNV	AD	NF1
17	40475360	.	C	T	1	nonsynonymous SNV	AD	STAT3
17	41243856	.	A	C	1	nonsynonymous SNV	AD	BRCA1
17	56770161	rs377297129	T	G	1	stoploss	AD	RAD51C
17	57079058	.	C	T	1	nonsynonymous SNV	AR	TRIM37
17	57093101	.	C	T	1	nonsynonymous SNV	AR	TRIM37
17	57106011	rs200239638	C	T	1	nonsynonymous SNV	AR	TRIM37
17	57109451	.	C	T	1	nonsynonymous SNV	AR	TRIM37
17	59761413	rs878855150	C	CTTTG	1	frameshift insertion	AD	BRIP1
17	59885856	rs28997570	T	C	2	nonsynonymous SNV	AD	BRIP1
17	63526198	rs140344858	C	T	1	nonsynonymous SNV	AD	AXIN2
17	63532528	rs138287857	G	A	1	nonsynonymous SNV	AD	AXIN2
17	63534353	rs139871607	T	C	1	nonsynonymous SNV	AD	AXIN2
17	63554116	rs201531372	G	A	1	nonsynonymous SNV	AD	AXIN2
17	66511668	.	C	T	1	nonsynonymous SNV	AD	PRKAR1A
17	66518940	rs200069356	G	A	2	nonsynonymous SNV	AD	PRKAR1A
17	74470206	.	C	A	1	nonsynonymous SNV	AD	RHBDF2
17	74473317	.	G	C	1	nonsynonymous SNV	AD	RHBDF2
17	74473329	rs140433374	C	T	1	nonsynonymous SNV	AD	RHBDF2
18	42530102	rs1316407204	A	G	1	nonsynonymous SNV	AD	SETBP1
18	42530797	rs548105094	C	T	1	nonsynonymous SNV	AD	SETBP1
18	42530798	rs563237293	G	A	3	nonsynonymous SNV	AD	SETBP1
18	42533267	rs149638556	G	A	3	nonsynonymous SNV	AD	SETBP1
19	1226555	rs200078204	C	T	1	nonsynonymous SNV	AD	STK11
19	4090612	rs117945277	G	A	1	nonsynonymous SNV	AD	MAP2K2
19	11152102	rs879796805	C	A	1	nonsynonymous SNV	AD	SMARCA4
19	50905173	rs41563714	C	T	2	nonsynonymous SNV	AD	POLD1
19	50916705	.	A	G	1	nonsynonymous SNV	AD	POLD1
19	50917023	rs145473716	G	A	1	nonsynonymous SNV	AD	POLD1
21	36231833	.	G	A	1	nonsynonymous SNV	AD	RUNX1
22	21348954	rs139368531	G	A	2	nonsynonymous SNV	AD	LZTR1
22	41545151	rs201480900	C	T	2	nonsynonymous SNV	AD	EP300
22	41573601	.	G	C	1	nonsynonymous SNV	AD	EP300
22	41573623	rs1437362111	C	T	1	nonsynonymous SNV	AD	EP300
22	41574718	.	C	G	1	nonsynonymous SNV	AD	EP300
X	132887574	.	G	T	1	nonsynonymous SNV	XR	GPC3
X	147030322	rs45540244	C	T	1	nonsynonymous SNV	XD	FMR1
