# Supplementary material for: Detection of Rare Germline Variants in the Genomes of B Cell Neoplasms
Source: Preprints.org preprint supplement (doi:10.20944/preprints202101.0330.v1), 2021-01-18
Supplement: Supplementary file 11 [file Supplementary Table 8.xlsx]

## Sheet: Sheet1
CHROM	POS	ID	REF	ALT	N. cases	Mutation Type	Gene
1	8073700	rs151045316	G	A	1	nonsynonymous SNV	ERRFI1
1	11227549	.	C	G	1	nonsynonymous SNV	MTOR
1	11297958	rs566273004	C	T	1	nonsynonymous SNV	MTOR
1	43804305	rs28928907	G	C	1	nonsynonymous SNV	MPL
1	120458660	.	G	C	1	nonsynonymous SNV	NOTCH2
1	120459251	rs143236410	G	T	3	nonsynonymous SNV	NOTCH2
1	120465364	rs116321057	C	T	1	nonsynonymous SNV	NOTCH2
1	150550799	.	C	A	1	nonsynonymous SNV	MCL1
1	162724631	rs371333028	C	T	1	nonsynonymous SNV	DDR2
1	162743311	.	C	T	1	nonsynonymous SNV	DDR2
1	162745588	rs754868982	G	T	1	nonsynonymous SNV	DDR2
1	162748379	.	A	G	1	nonsynonymous SNV	DDR2
1	204494703	rs148900701	C	G	1	nonsynonymous SNV	MDM4
1	204518437	rs201947927	C	T	3	nonsynonymous SNV	MDM4
2	29416170	rs370701220	C	CT	1	frameshift insertion	ALK
2	29445238	.	C	G	1	nonsynonymous SNV	ALK
2	48027580	.	A	G	1	nonsynonymous SNV	MSH6
2	48033423	rs147453999	A	T	1	nonsynonymous SNV	MSH6
2	48033741	.	A	T	1	stopgain	MSH6
2	48033995	.	T	C	1	nonsynonymous SNV	MSH6
2	61753571	.	T	C	1	nonsynonymous SNV	XPO1
2	209108190	rs142801125	T	C	1	nonsynonymous SNV	IDH1
2	209116182	rs142923780	A	C	1	nonsynonymous SNV	IDH1
2	212248504	.	G	A	1	nonsynonymous SNV	ERBB4
2	212248576	.	C	G	1	nonsynonymous SNV	ERBB4
2	212530126	.	T	G	1	nonsynonymous SNV	ERBB4
2	212578329	rs1377345647	T	C	1	nonsynonymous SNV	ERBB4
2	212615423	rs191386517	C	T	1	nonsynonymous SNV	ERBB4
3	69928307	.	G	A	1	nonsynonymous SNV	MITF
3	70008500	.	C	T	2	nonsynonymous SNV	MITF
3	70014091	rs149617956	G	A	7	nonsynonymous SNV	MITF
3	89259477	rs200567888	G	T	2	nonsynonymous SNV	EPHA3
3	89499366	rs142030914	C	G	1	nonsynonymous SNV	EPHA3
3	138453585	.	T	A	1	nonsynonymous SNV	PIK3CB
3	138453640	rs148366420	G	A	1	nonsynonymous SNV	PIK3CB
3	138474646	.	C	G	1	nonsynonymous SNV	PIK3CB
3	138478130	rs148660928	G	A	1	nonsynonymous SNV	PIK3CB
3	142272098	rs141783863	A	G	1	nonsynonymous SNV	ATR
3	142272513	.	T	G	1	nonsynonymous SNV	ATR
3	142272549	.	G	A	1	nonsynonymous SNV	ATR
3	185798862	rs61760177	T	C	1	nonsynonymous SNV	ETV5
4	1806131	rs17881656	T	C	10	nonsynonymous SNV	FGFR3
4	55961103	rs140041720	C	T	1	nonsynonymous SNV	KDR
4	55964925	rs149745504	G	A	3	nonsynonymous SNV	KDR
4	55968531	.	G	A	1	nonsynonymous SNV	KDR
4	55972029	rs55716939	C	T	2	nonsynonymous SNV	KDR
4	55984888	rs201719457	C	T	3	nonsynonymous SNV	KDR
4	106156255	.	G	T	1	nonsynonymous SNV	TET2
4	106157472	.	T	A	1	stopgain	TET2
5	67522580	.	T	C	1	nonsynonymous SNV	PIK3R1
5	67591254	.	G	T	1	nonsynonymous SNV	PIK3R1
5	112102960	rs139196838	C	T	1	nonsynonymous SNV	APC
5	112164557	rs144056494	T	C	1	nonsynonymous SNV	APC
5	112174677	rs143638171	T	C	7	nonsynonymous SNV	APC
5	112174802	rs201830995	C	T	2	nonsynonymous SNV	APC
5	112175423	.	C	G	1	nonsynonymous SNV	APC
5	112178112	rs34919187	C	T	1	nonsynonymous SNV	APC
5	112178805	rs147549623	G	A	3	nonsynonymous SNV	APC
5	149497358	rs35731372	C	T	1	nonsynonymous SNV	PDGFRB
5	149500795	.	T	C	1	nonsynonymous SNV	PDGFRB
5	149509395	rs142992960	G	A	1	nonsynonymous SNV	PDGFRB
6	41908701	.	G	C	1	nonsynonymous SNV	CCND3
6	117609822	.	C	G	1	nonsynonymous SNV	ROS1
6	117622137	rs142264513	C	T	1	nonsynonymous SNV	ROS1
6	117631302	rs138376257	G	A	1	nonsynonymous SNV	ROS1
6	117674302	.	T	G	1	nonsynonymous SNV	ROS1
6	117686261	rs149513638	C	T	4	nonsynonymous SNV	ROS1
6	117686297	rs1302519741	TTAAATAAGGCA	T	1	stopgain	ROS1
6	117706887	.	A	C	1	nonsynonymous SNV	ROS1
6	117715381	rs56274823	A	G	6	nonsynonymous SNV	ROS1
6	152163757	rs149308960	G	T	2	nonsynonymous SNV	ESR1
6	152265352	rs142712646	C	T	4	nonsynonymous SNV	ESR1
6	152265443	rs77797873	A	G	2	nonsynonymous SNV	ESR1
7	55220286	.	A	C	1	nonsynonymous SNV	EGFR
7	55259442	.	G	A	1	nonsynonymous SNV	EGFR
7	55269020	rs182857647	C	T	1	nonsynonymous SNV	EGFR
7	92404108	.	CTCTG	C	1	frameshift deletion	CDK6
7	116339677	.	T	A	1	nonsynonymous SNV	MET
7	116340177	rs200074800	G	A	1	nonsynonymous SNV	MET
7	116371911	.	C	A	1	nonsynonymous SNV	MET
7	116411923	rs34589476	C	T	1	nonsynonymous SNV	MET
7	116415124	rs370529693	C	T	1	nonsynonymous SNV	MET
7	116436003	.	TG	T	1	frameshift deletion	MET
7	128829039	rs570242755	G	GGCT	1	nonframeshift insertion	SMO
7	140439694	.	C	T	1	nonsynonymous SNV	BRAF
7	148515137	rs1441187386	G	A	1	nonsynonymous SNV	EZH2
8	108970478	rs147756016	T	A	4	nonsynonymous SNV	RSPO2
8	108972931	rs142649056	G	A	1	nonsynonymous SNV	RSPO2
8	109001337	.	G	A	1	nonsynonymous SNV	RSPO2
8	128750527	rs146505192	T	C	3	nonsynonymous SNV	MYC
8	128750972	.	C	T	1	nonsynonymous SNV	MYC
8	128750986	rs4645960	G	T	1	nonsynonymous SNV	MYC
9	5126715	rs142269166	A	G	11	nonsynonymous SNV	JAK2
9	80537169	.	T	C	1	nonsynonymous SNV	GNAQ
9	93641206	rs886319107	G	C	1	nonsynonymous SNV	SYK
9	93650837	.	G	A	1	nonsynonymous SNV	SYK
9	98212185	rs113663584	C	T	3	nonsynonymous SNV	PTCH1
9	98231239	rs570441437	G	A	1	nonsynonymous SNV	PTCH1
9	98240378	rs142274954	C	T	2	nonsynonymous SNV	PTCH1
9	98268854	.	G	C	1	nonsynonymous SNV	PTCH1
9	133738340	rs34549764	A	G	4	nonsynonymous SNV	ABL1
9	133759686	rs61746126	A	G	1	nonsynonymous SNV	ABL1
9	133760790	rs367600262	C	T	1	nonsynonymous SNV	ABL1
9	135776211	.	T	C	1	nonsynonymous SNV	TSC1
9	135786013	rs118203504	G	A	2	nonsynonymous SNV	TSC1
9	136899924	rs149702159	T	C	3	nonsynonymous SNV	BRD3
9	139391876	.	C	T	1	nonsynonymous SNV	NOTCH1
9	139401234	rs182330532	G	A	1	nonsynonymous SNV	NOTCH1
9	139405111	rs201620358	G	A	5	nonsynonymous SNV	NOTCH1
10	43609063	.	G	C	1	nonsynonymous SNV	RET
10	123263356	.	C	T	1	nonsynonymous SNV	FGFR2
10	123325096	.	G	C	1	nonsynonymous SNV	FGFR2
11	69457947	.	C	G	1	nonsynonymous SNV	CCND1
11	108106417	.	C	T	1	stopgain	ATM
11	108115566	.	CT	C	1	frameshift deletion	ATM
11	108119823	rs56128736	T	C	10	nonsynonymous SNV	ATM
11	108121787	rs35963548	G	A	1	nonsynonymous SNV	ATM
11	108128246	rs34231402	T	A	2	nonsynonymous SNV	ATM
11	108141789	rs1060501703	A	G	1	splice_acceptor	ATM
11	108143329	.	C	T	1	nonsynonymous SNV	ATM
11	108159720	.	C	T	1	nonsynonymous SNV	ATM
11	108160480	rs138327406	T	G	1	nonsynonymous SNV	ATM
11	108186610	rs11212587	G	A	4	nonsynonymous SNV	ATM
11	108196075	.	A	T	1	nonsynonymous SNV	ATM
11	108205787	rs1064793406	TAA	T	1	frameshift deletion	ATM
11	108235906	.	C	T	1	nonsynonymous SNV	ATM
11	108236070	.	CAACAAAGTAGCTGAACGTGTCTTAATGA	C	1	frameshift deletion	ATM
12	4385357	.	G	A	1	nonsynonymous SNV	CCND2
12	12022810	.	C	G	1	nonsynonymous SNV	ETV6
12	12871180	rs546234840	A	G	1	nonsynonymous SNV	CDKN1B
12	25368451	rs368557003	T	C	1	nonsynonymous SNV	KRAS
12	56480387	.	A	T	1	nonsynonymous SNV	ERBB3
12	56486575	rs12320176	A	G	1	nonsynonymous SNV	ERBB3
12	56493615	rs566285257	GAT	G	1	splice_acceptor	ERBB3
12	56495049	rs79759315	C	T	1	nonsynonymous SNV	ERBB3
12	56495339	rs55699040	C	A	4	nonsynonymous SNV	ERBB3
12	56495469	.	T	C	1	nonsynonymous SNV	ERBB3
12	120534955	rs187211562	C	T	1		RAB35
13	28609652	rs527809498	G	A	1	nonsynonymous SNV	FLT3
13	28611367	.	T	G	1	nonsynonymous SNV	FLT3
13	32907111	rs397507591	AG	A	1	frameshift deletion	BRCA2
13	32937333	rs28897745	A	G	1	nonsynonymous SNV	BRCA2
13	32945172	rs11571747	A	C	2	nonsynonymous SNV	BRCA2
13	32953549	rs28897754	G	T	3	nonsynonymous SNV	BRCA2
14	35873822	.	T	C	1	nonsynonymous SNV	NFKBIA
15	88420216	.	G	T	1	nonsynonymous SNV	NTRK3
15	88472622	rs139392904	G	A	1	nonsynonymous SNV	NTRK3
15	88576136	.	T	A	1	nonsynonymous SNV	NTRK3
15	90633791	rs139512088	A	G	1	nonsynonymous SNV	IDH2
15	99434811	.	G	T	1	nonsynonymous SNV	IGF1R
15	99442765	rs45445894	G	A	2	nonsynonymous SNV	IGF1R
16	2112537	.	T	G	1	nonsynonymous SNV	TSC2
16	2112558	rs45484298	G	A	5	nonsynonymous SNV	TSC2
16	2120487	rs1800729	G	A	8	nonsynonymous SNV	TSC2
16	2124321	rs45517238	C	A	2	nonsynonymous SNV	TSC2
16	2136279	.	A	T	1	nonsynonymous SNV	TSC2
16	2137933	rs184892282	T	C	1	nonsynonymous SNV	TSC2
16	2138096	rs45517391	C	T	1	nonsynonymous SNV	TSC2
16	2138570	rs45517423	C	T	3	nonsynonymous SNV	TSC2
16	3820773	rs142047649	G	A	1	nonsynonymous SNV	CREBBP
16	30128521	.	C	T	1	synonymous SNV	MAPK3
16	30129685	rs146660425	G	A	2	synonymous SNV	MAPK3
16	30133311	rs200617125	C	T	2	nonsynonymous SNV	MAPK3
16	68847228	.	G	A	1	nonsynonymous SNV	CDH1
16	68847305	.	G	C	1	nonsynonymous SNV	CDH1
17	17125849	rs747429545	T	G	1	nonsynonymous SNV	FLCN
17	29676209	.	A	T	1	nonsynonymous SNV	NF1
17	29679412	rs148154172	C	T	1	nonsynonymous SNV	NF1
17	29701073	.	A	G	1	nonsynonymous SNV	NF1
17	37627674	rs555751910	C	T	1	nonsynonymous SNV	CDK12
17	37686925	rs562971864	C	T	1	nonsynonymous SNV	CDK12
17	37687355	.	T	C	1	nonsynonymous SNV	CDK12
17	37687436	rs767287779	C	G	1	nonsynonymous SNV	CDK12
17	37687472	.	G	A	1	stopgain	CDK12
17	37872145	rs142456637	C	T	2	nonsynonymous SNV	ERBB2
17	41243856	.	A	C	1	nonsynonymous SNV	BRCA1
17	41606065	rs117364926	G	A	1	nonsynonymous SNV	ETV4
17	41606573	.	C	T	1	nonsynonymous SNV	ETV4
17	41606891	.	T	G	1	nonsynonymous SNV	ETV4
18	45374888	.	C	T	1	nonsynonymous SNV	SMAD2
19	1226555	rs200078204	C	T	1	nonsynonymous SNV	STK11
19	3119235	rs529942770	G	A	1	nonsynonymous SNV	GNA11
19	4090612	rs117945277	G	A	1	nonsynonymous SNV	MAP2K2
19	11152102	rs879796805	C	A	1	nonsynonymous SNV	SMARCA4
19	17945708	rs146837396	C	G	4	nonsynonymous SNV	JAK3
19	17947980	rs193922361	G	A	1	nonsynonymous SNV	JAK3
19	30312632	.	A	C	1	nonsynonymous SNV	CCNE1
19	40741948	.	C	T	1	nonsynonymous SNV	AKT2
20	31021182	rs201899433	G	A	1	nonsynonymous SNV	ASXL1
20	57429275	.	G	A	1	nonsynonymous SNV	GNAS
21	36231833	.	G	A	1	nonsynonymous SNV	RUNX1
21	42842574	.	C	T	1	splice_donor	TMPRSS2
21	42860331	.	C	G	1	nonsynonymous SNV	TMPRSS2
21	42860339	.	C	T	1	nonsynonymous SNV	TMPRSS2
22	29445447	rs200654061	C	G	4	nonsynonymous SNV	ZNRF3
22	29446577	.	C	T	1	nonsynonymous SNV	ZNRF3
22	29446903	rs199737518	C	A	1	nonsynonymous SNV	ZNRF3
X	66931348	.	C	T	1	nonsynonymous SNV	AR
X	66941675	.	G	C	1	nonsynonymous SNV	AR
X	70357732	.	C	T	1	nonsynonymous SNV	MED12
