# Supplementary material for: Detection of Rare Germline Variants in the Genomes of B Cell Neoplasms
Source: Preprints.org preprint supplement (doi:10.20944/preprints202101.0330.v1), 2021-01-18
Supplement: Supplementary file 12 [file Supplementary Table 9.xlsx]

## Sheet: Sheet1
CHROM	POS	ID	REF	ALT	N. cases	Variant Type	Gene
1	3322211	.	A	G	1	nonsynonymous SNV	PRDM16
1	3328571	.	T	C	1	nonsynonymous SNV	PRDM16
1	3342270	.	A	G	1	nonsynonymous SNV	PRDM16
1	3342278	.	C	T	1	nonsynonymous SNV	PRDM16
1	7151427	.	A	G	1	nonsynonymous SNV	CAMTA1
1	7724727	rs141259598	C	G	1	nonsynonymous SNV	CAMTA1
1	7798255	.	G	A	1	nonsynonymous SNV	CAMTA1
1	7805943	.	C	A	1	nonsynonymous SNV	CAMTA1
1	14105837	rs781259901	G	A	1	nonsynonymous SNV	PRDM2
1	14106104	.	T	A	1	nonsynonymous SNV	PRDM2
1	14107094	rs1409179904	C	T	1	nonsynonymous SNV	PRDM2
1	14107289	.	C	A	1	nonsynonymous SNV	PRDM2
1	14107658	rs148047054	A	T	1	nonsynonymous SNV	PRDM2
1	14109227	.	G	C	1	nonsynonymous SNV	PRDM2
1	15832495	rs146054764	T	G	2	nonsynonymous SNV	CASP9
1	15833555	rs145118493	T	C	3	nonsynonymous SNV	CASP9
1	15844763	rs535165327	G	A	1	nonsynonymous SNV	CASP9
1	15844883	.	C	A	1	nonsynonymous SNV	CASP9
1	17942592	.	A	C	1	nonsynonymous SNV	ARHGEF10L
1	17982492	.	T	C	1	nonsynonymous SNV	ARHGEF10L
1	18023427	.	T	G	1	nonsynonymous SNV	ARHGEF10L
1	18023606	rs375266292	C	T	2	nonsynonymous SNV	ARHGEF10L
1	32741626	.	CT	C	1	frameshift deletion	LCK
1	35653647	.	C	T	1	nonsynonymous SNV	SFPQ
1	35653657	rs376430574	T	A	1	nonsynonymous SNV	SFPQ
1	35657040	.	C	T	1	nonsynonymous SNV	SFPQ
1	36757052	rs41303413	G	A	1	nonsynonymous SNV	THRAP3
1	36762194	.	A	G	1	nonsynonymous SNV	THRAP3
1	36762350	rs144921703	A	G	2	nonsynonymous SNV	THRAP3
1	36767197	rs200329766	C	T	1	nonsynonymous SNV	THRAP3
1	36932365	.	C	T	1	nonsynonymous SNV	CSF3R
1	40363345	.	G	A	1	nonsynonymous SNV	MYCL
1	47717556	.	C	T	1	nonsynonymous SNV	STIL
1	47748129	rs149185431	G	A	6	nonsynonymous SNV	STIL
1	51822440	.	T	G	1	nonsynonymous SNV	EPS15
1	51829550	.	G	A	1	nonsynonymous SNV	EPS15
1	51869200	.	C	G	1	nonsynonymous SNV	EPS15
1	59247903	.	C	T	1	synonymous SNV	JUN
1	59247917	.	T	G	1	synonymous SNV	JUN
1	110882536	rs139502540	A	G	3	nonsynonymous SNV	RBM15
1	110884420	rs555751324	A	G	1	nonsynonymous SNV	RBM15
1	110888159	.	A	T	1	splice_acceptor	RBM15
1	116932163	.	C	A	1	nonsynonymous SNV	ATP1A1
1	116936189	.	C	A	1	nonsynonymous SNV	ATP1A1
1	116940565	.	C	G	1	nonsynonymous SNV	ATP1A1
1	116943573	.	T	A	1	nonsynonymous SNV	ATP1A1
1	116944228	.	C	T	1	nonsynonymous SNV	ATP1A1
1	144909909	rs148375132	T	A	1	nonsynonymous SNV	PDE4DIP
1	144946676	.	C	G	1	nonsynonymous SNV	PDE4DIP
1	147084683	rs145723033	A	G	3	nonsynonymous SNV	BCL9
1	147090797	.	C	G	1	nonsynonymous SNV	BCL9
1	147091662	rs587603499	CATG	C	1	nonframeshift deletion	BCL9
1	147092671	rs145145153	T	A	1	nonsynonymous SNV	BCL9
1	147094140	rs200473630	A	G	1	nonsynonymous SNV	BCL9
1	147096153	rs113081863	G	A	1	nonsynonymous SNV	BCL9
1	150785775	rs587733705	C	T	1	nonsynonymous SNV	ARNT
1	150789285	rs200208316	G	C	2	nonsynonymous SNV	ARNT
1	150795736	.	G	A	1	nonsynonymous SNV	ARNT
1	150801618	.	A	C	1	nonsynonymous SNV	ARNT
1	150917623	rs587715611;rs755041728;rs587751384	TG	T,TGG	5	frameshift deletion	SETDB1
1	150917623	rs587715611;rs755041728;rs587751384	TG	T,TGG	5	frameshift insertion	SETDB1
1	150923140	.	G	A	1	nonsynonymous SNV	SETDB1
1	150933468	rs113110991	C	T	9	nonsynonymous SNV	SETDB1
1	154148640	.	C	T	1	nonsynonymous SNV	TPM3
1	156761535	.	T	A	1	nonsynonymous SNV	PRCC
1	157548296	.	A	G	1	nonsynonymous SNV	FCRL4
1	157557721	rs145588032	G	A	1	stopgain	FCRL4
1	170705246	.	C	G	1	nonsynonymous SNV	PRRX1
1	179077424	rs1049620714	A	T	1	nonsynonymous SNV	ABL2
1	179077709	rs558127546	C	T	2	nonsynonymous SNV	ABL2
1	179078052	rs55892721	T	A	3	nonsynonymous SNV	ABL2
1	179079416	rs56004467	C	T	1	splice_donor	ABL2
1	179079425	.	A	G	1	nonsynonymous SNV	ABL2
1	186303528	rs200189169	G	C	1	nonsynonymous SNV	TPR
1	186305747	rs35917803	C	A	8	nonsynonymous SNV	TPR
1	186306168	.	T	A	1	nonsynonymous SNV	TPR
1	186308826	.	G	T	1	nonsynonymous SNV	TPR
1	186316510	rs201054576	C	T	1	nonsynonymous SNV	TPR
1	186320484	.	T	C	1	nonsynonymous SNV	TPR
1	186327777	.	A	C	1	nonsynonymous SNV	TPR
1	186329119	.	C	T	1	nonsynonymous SNV	TPR
1	186330768	rs201760745	T	C	1	nonsynonymous SNV	TPR
1	186332066	rs186229244	T	G	3	nonsynonymous SNV	TPR
1	198704265	.	G	A	1	nonsynonymous SNV	PTPRC
1	198717251	.	A	C	1	nonsynonymous SNV	PTPRC
1	198725086	.	A	G	1	nonsynonymous SNV	PTPRC
1	205628442	rs151018622	C	T	1	nonsynonymous SNV	SLC45A3
1	205632155	rs142713511	G	A	1	nonsynonymous SNV	SLC45A3
1	205633685	rs149769508	C	T	3	nonsynonymous SNV	SLC45A3
2	16082458	.	C	T	1	nonsynonymous SNV	MYCN
2	24881577	rs369860118	C	G	1	nonsynonymous SNV	NCOA1
2	24930055	rs142018995	A	T	2	nonsynonymous SNV	NCOA1
2	24952629	.	C	T	1	nonsynonymous SNV	NCOA1
2	24985617	rs201252444	T	C	3	nonsynonymous SNV	NCOA1
2	25965535	rs202092276	T	A	1	nonsynonymous SNV	ASXL2
2	25966354	.	G	A	1	nonsynonymous SNV	ASXL2
2	25990452	.	T	C	1	nonsynonymous SNV	ASXL2
2	25991719	.	G	T	1	nonsynonymous SNV	ASXL2
2	26022390	rs912586455	A	T	1	nonsynonymous SNV	ASXL2
2	37078233	rs151101479	G	T	1	nonsynonymous SNV	STRN
2	37111123	.	G	T	1	nonsynonymous SNV	STRN
2	42490412	rs200273713	A	C	1	nonsynonymous SNV	EML4
2	42515451	rs143932826	G	A	2	nonsynonymous SNV	EML4
2	42522269	.	C	G	2	nonsynonymous SNV	EML4
2	42522311	rs777749257	C	A	1	nonsynonymous SNV	EML4
2	42552658	rs538096882	A	G	1	nonsynonymous SNV	EML4
2	42553315	rs34894922	A	G	1	nonsynonymous SNV	EML4
2	45233463	rs147806994	G	A	2	nonsynonymous SNV	SIX2
2	46607742	.	C	T	1	nonsynonymous SNV	EPAS1
2	46608778	.	C	G	1	nonsynonymous SNV	EPAS1
2	70315126	rs148864700	A	G	1	nonsynonymous SNV	PCBP1
2	79878765	.	T	G	1	nonsynonymous SNV	CTNNA2
2	80101355	.	G	T	1	nonsynonymous SNV	CTNNA2
2	80782869	.	G	A	1	nonsynonymous SNV	CTNNA2
2	100170775	rs151104269	C	T	2	nonsynonymous SNV	AFF3
2	100210696	.	T	C	1	nonsynonymous SNV	AFF3
2	109379847	rs549497956	C	T	2	nonsynonymous SNV	RANBP2
2	109382516	.	T	C	1	nonsynonymous SNV	RANBP2
2	109399107	rs200863740	C	T	1	nonsynonymous SNV	RANBP2
2	141113913	.	T	C	1	nonsynonymous SNV	LRP1B
2	141113994	rs138237325	G	A	3	nonsynonymous SNV	LRP1B
2	141114007	.	A	G	1	nonsynonymous SNV	LRP1B
2	141122274	.	T	A	1	nonsynonymous SNV	LRP1B
2	141128797	.	G	A	1	nonsynonymous SNV	LRP1B
2	141260535	.	C	T	1	nonsynonymous SNV	LRP1B
2	141291694	rs527342957	C	T	1	nonsynonymous SNV	LRP1B
2	141457963	rs149097380	G	A	4	nonsynonymous SNV	LRP1B
2	141458164	.	C	T	1	nonsynonymous SNV	LRP1B
2	141458166	rs376156015	T	C	1	nonsynonymous SNV	LRP1B
2	141598583	rs199519370	G	A	1	nonsynonymous SNV	LRP1B
2	141739813	rs143670199	C	T	1	nonsynonymous SNV	LRP1B
2	141816618	.	T	A	1	nonsynonymous SNV	LRP1B
2	141946033	.	C	G	1	nonsynonymous SNV	LRP1B
2	176959364	rs1432063993	C	T	1	nonsynonymous SNV	HOXD13
2	176973644	rs200498866	A	G	1	nonsynonymous SNV	HOXD11
2	178096406	rs141363120	G	A	4	nonsynonymous SNV	NFE2L2
2	187490251	.	C	T	1	nonsynonymous SNV	ITGAV
2	187501824	.	G	A	1	nonsynonymous SNV	ITGAV
2	189852859	.	C	G	1	nonsynonymous SNV	COL3A1
2	189855743	rs112185887	G	A	1	nonsynonymous SNV	COL3A1
2	189864081	.	C	T	1	nonsynonymous SNV	COL3A1
2	190660586	rs61756360	C	T	1	nonsynonymous SNV	PMS1
2	190742010	rs142159998	C	T	3	nonsynonymous SNV	PMS1
2	215610562	rs146946984	C	T	1	nonsynonymous SNV	BARD1
2	215645310	.	T	C	1	nonsynonymous SNV	BARD1
2	215645867	.	C	A	1	nonsynonymous SNV	BARD1
2	215661842	rs879254139	C	A	1	splice_acceptor	BARD1
2	216184456	.	T	C	1	splice_donor	ATIC
2	216190860	.	A	G	1	nonsynonymous SNV	ATIC
2	216191669	.	T	A	1	nonsynonymous SNV	ATIC
2	216199644	rs956941513	G	A	1	nonsynonymous SNV	ATIC
2	219846600	.	G	C	1	nonsynonymous SNV	FEV
2	223096946	.	G	C	1	nonsynonymous SNV	PAX3
2	223795450	rs1046032	T	C	1	nonsynonymous SNV	ACSL3
2	237490000	rs150632398	C	T	2	nonsynonymous SNV	ACKR3
2	237490115	rs143408017	C	T	1	nonsynonymous SNV	ACKR3
3	9101988	rs1449155650	T	C	1	nonsynonymous SNV	SRGAP3
3	12393122	.	G	A	1	nonsynonymous SNV	PPARG
3	13612222	rs185394047	G	A	1	nonsynonymous SNV	FBLN2
3	13612351	rs373674930	G	A	1	nonsynonymous SNV	FBLN2
3	13612459	rs113514375	G	C	1	nonsynonymous SNV	FBLN2
3	13613135	.	A	T	1	nonsynonymous SNV	FBLN2
3	13661319	rs200141144	G	A	1	nonsynonymous SNV	FBLN2
3	13672274	rs201224373	G	A	1	nonsynonymous SNV	FBLN2
3	13672888	rs199983858	C	G	1	nonsynonymous SNV	FBLN2
3	13679318	rs373305821	C	T	1	nonsynonymous SNV	FBLN2
3	48716065	rs142430903	G	A	4	nonsynonymous SNV	NCKIPSD
3	52623158	.	A	G	1	nonsynonymous SNV	PBRM1
3	52623229	rs141067977	G	A	1	nonsynonymous SNV	PBRM1
3	52668826	rs147499494	G	A	1	nonsynonymous SNV	PBRM1
3	53700551	rs148674323	G	A	1	nonsynonymous SNV	CACNA1D
3	53756360	.	A	T	1	nonsynonymous SNV	CACNA1D
3	53757995	rs149676780	A	G	1	nonsynonymous SNV	CACNA1D
3	53760960	.	G	A	1	nonsynonymous SNV	CACNA1D
3	53764570	.	A	T	1	stopgain	CACNA1D
3	53842681	rs571923567	C	T	1	nonsynonymous SNV	CACNA1D
3	59908137	rs202183587	C	T	1	nonsynonymous SNV	FHIT
3	60522626	.	C	A	1	nonsynonymous SNV	FHIT
3	77542429	.	G	T	1	nonsynonymous SNV	ROBO2
3	77614236	rs200111733	A	G	1	nonsynonymous SNV	ROBO2
3	77657045	rs374166639	C	A	1	nonsynonymous SNV	ROBO2
3	77666792	.	C	A	2	nonsynonymous SNV	ROBO2
3	77684116	rs62250276	C	T	1	nonsynonymous SNV	ROBO2
3	121155022	.	G	T	1	stopgain	POLQ
3	121168167	rs150364457	T	C	3	nonsynonymous SNV	POLQ
3	121187254	rs376729696	T	C	1	nonsynonymous SNV	POLQ
3	121206336	.	C	CTGTA	1	frameshift insertion	POLQ
3	121206883	.	G	A	1	nonsynonymous SNV	POLQ
3	121217496	rs142537679	A	C	5	nonsynonymous SNV	POLQ
3	121240849	.	C	A	1	splice_donor	POLQ
3	121248569	.	CA	C	1	frameshift deletion	POLQ
3	121251884	rs61757736	A	C	3	nonsynonymous SNV	POLQ
3	121258399	.	T	C	1	nonsynonymous SNV	POLQ
3	128348870	.	G	C	1	nonsynonymous SNV	RPN1
3	128348979	.	A	G	1	nonsynonymous SNV	RPN1
3	128356897	.	C	G	1	nonsynonymous SNV	RPN1
3	138665011	rs1465408686	C	T	1	nonsynonymous SNV	FOXL2
3	138665561	.	T	G	1	nonsynonymous SNV	FOXL2
3	155615742	.	A	G	1	nonsynonymous SNV	GMPS
3	155628504	.	T	G	1	nonsynonymous SNV	GMPS
3	155632309	.	A	G	1	nonsynonymous SNV	GMPS
3	155649643	rs190602670	A	G	1	nonsynonymous SNV	GMPS
3	185414441	.	C	A	1	nonsynonymous SNV	IGF2BP2
3	188123972	rs183529256	C	T	1	nonsynonymous SNV	LPP
3	188327019	rs149437411	C	T	6	nonsynonymous SNV	LPP
3	188327406	.	A	G	1	nonsynonymous SNV	LPP
3	188592145	rs9830664	G	A	7	nonsynonymous SNV	LPP
3	189526266	.	T	A	1	nonsynonymous SNV	TP63
3	192516717	.	C	G	1	nonsynonymous SNV	MB21D2
3	192516851	.	A	C	1	nonsynonymous SNV	MB21D2
3	192517239	.	T	C	1	nonsynonymous SNV	MB21D2
3	192517304	rs1472341110	A	G	1	nonsynonymous SNV	MB21D2
3	195481129	rs144662307	C	A	4	stopgain	MUC4
3	195486123	rs149016812	G	A	2	nonsynonymous SNV	MUC4
3	195490414	rs142108900	T	G	4	nonsynonymous SNV	MUC4
3	195492197	rs1352961533	C	G	1	nonsynonymous SNV	MUC4
3	195496005	rs147627958	T	C	4	nonsynonymous SNV	MUC4
3	195498672	rs1395586960	G	A	1	stopgain	MUC4
3	195792376	rs539830157	T	C	4	nonsynonymous SNV	TFRC
4	25664173	.	C	A	1	stopgain	SLC34A2
4	25674739	rs138755203	C	T	1	nonsynonymous SNV	SLC34A2
4	40103992	.	CAAGT	C	1	frameshift deletion	N4BP2
4	40113779	rs377188372	C	G	4	nonsynonymous SNV	N4BP2
4	40144356	.	C	G	1	nonsynonymous SNV	N4BP2
4	40144434	.	G	C	1	nonsynonymous SNV	N4BP2
4	54319120	rs368570756	C	T	1	nonsynonymous SNV	FIP1L1
4	54880005	rs1184296732	T	C	1	nonsynonymous SNV	CHIC2
4	87622436	.	C	T	1	nonsynonymous SNV	PTPN13
4	87643478	rs61757789	G	C	3	nonsynonymous SNV	PTPN13
4	87655513	rs202038172	G	A	1	nonsynonymous SNV	PTPN13
4	87656819	.	T	C	1	nonsynonymous SNV	PTPN13
4	87683889	rs186651045	C	T	3	nonsynonymous SNV	PTPN13
4	87692496	rs200197835	G	A	3	nonsynonymous SNV	PTPN13
4	87707057	rs201581281	G	A,C	2	nonsynonymous SNV	PTPN13
4	87707057	rs201581281	G	A,C	2	nonsynonymous SNV	PTPN13
4	87732221	rs182154840	G	A	3	nonsynonymous SNV	PTPN13
4	87732228	rs61730643	G	T	1	nonsynonymous SNV	PTPN13
4	87967908	.	T	C	1	nonsynonymous SNV	AFF1
4	87968733	.	C	T	1	nonsynonymous SNV	AFF1
4	88016121	rs200125007	C	T	1	nonsynonymous SNV	AFF1
4	88035946	rs61734706	C	T	1	nonsynonymous SNV	AFF1
4	99273636	.	G	C	1	nonsynonymous SNV	RAP1GDS1
4	99342451	rs187721964	G	A	1	nonsynonymous SNV	RAP1GDS1
4	109000649	rs151041212	C	T	1	nonsynonymous SNV	LEF1
4	109010311	.	G	T	1	nonsynonymous SNV	LEF1
4	109010339	rs138774973	C	A	2	nonsynonymous SNV	LEF1
4	109084837	.	G	A	1	nonsynonymous SNV	LEF1
4	126238938	.	G	T	1	nonsynonymous SNV	FAT4
4	126239115	.	G	A	1	nonsynonymous SNV	FAT4
4	126240145	.	C	A	1	nonsynonymous SNV	FAT4
4	126240201	rs886241458	G	A	1	nonsynonymous SNV	FAT4
4	126240270	.	G	A	1	nonsynonymous SNV	FAT4
4	126241735	rs201934636	T	C	1	nonsynonymous SNV	FAT4
4	126329821	rs139716832	A	G	1	nonsynonymous SNV	FAT4
4	126336168	rs188126059	T	C	1	nonsynonymous SNV	FAT4
4	126336546	.	T	A	1	nonsynonymous SNV	FAT4
4	126371682	.	T	G	1	nonsynonymous SNV	FAT4
4	126372789	.	A	C	1	nonsynonymous SNV	FAT4
4	126373906	.	G	A	1	nonsynonymous SNV	FAT4
4	126412333	rs138173652	G	A	3	nonsynonymous SNV	FAT4
4	187517711	.	C	A	1	nonsynonymous SNV	FAT1
4	187517774	.	T	G	1	nonsynonymous SNV	FAT1
4	187517835	.	A	G	1	nonsynonymous SNV	FAT1
4	187521495	rs147863702	T	C	1	nonsynonymous SNV	FAT1
4	187522566	rs201279606	T	C	7	nonsynonymous SNV	FAT1
4	187525667	.	T	A	1	nonsynonymous SNV	FAT1
4	187531074	rs199989457	C	T	1	nonsynonymous SNV	FAT1
4	187535402	rs1003917683	T	C	1	nonsynonymous SNV	FAT1
4	187539327	rs765816122	T	A	1	nonsynonymous SNV	FAT1
4	187539653	rs201751862	G	A	1	nonsynonymous SNV	FAT1
4	187539783	rs200149452	C	T	1	nonsynonymous SNV	FAT1
4	187540095	rs183730071	A	G	1	nonsynonymous SNV	FAT1
4	187540610	rs201363601	G	A	2	nonsynonymous SNV	FAT1
4	187540970	.	G	A	1	nonsynonymous SNV	FAT1
4	187541319	.	AT	A	1	frameshift deletion	FAT1
4	187541678	rs377498159	C	T	1	nonsynonymous SNV	FAT1
4	187557301	rs201001818	T	C	1	nonsynonymous SNV	FAT1
4	187557782	rs200252550	G	A	1	nonsynonymous SNV	FAT1
4	187627804	rs181661569	C	G	1	nonsynonymous SNV	FAT1
4	187627917	.	A	C	1	nonsynonymous SNV	FAT1
4	187628853	rs370215067	T	C	2	nonsynonymous SNV	FAT1
4	187629727	rs375942121	G	C	1	nonsynonymous SNV	FAT1
4	187630567	.	C	G	1	nonsynonymous SNV	FAT1
5	10973710	.	T	C	1	nonsynonymous SNV	CTNND2
5	11111041	.	C	T	1	nonsynonymous SNV	CTNND2
5	11199657	.	A	T	1	nonsynonymous SNV	CTNND2
5	11346514	rs201675268	G	A	1	nonsynonymous SNV	CTNND2
5	11384828	.	A	G	1	nonsynonymous SNV	CTNND2
5	11397162	rs141302945	G	A	1	nonsynonymous SNV	CTNND2
5	11397210	.	T	A	1	nonsynonymous SNV	CTNND2
5	11732279	.	G	C	1	nonsynonymous SNV	CTNND2
5	24492943	.	G	A	1	nonsynonymous SNV	CDH10
5	24509897	rs182867464	G	A	1	nonsynonymous SNV	CDH10
5	24537499	.	C	T	1	nonsynonymous SNV	CDH10
5	24537539	rs139913021	G	A	3	nonsynonymous SNV	CDH10
5	31485012	.	C	T	1	nonsynonymous SNV	DROSHA
5	31515273	rs372990492	C	T	1	nonsynonymous SNV	DROSHA
5	31521245	rs975072926	T	C	1	nonsynonymous SNV	DROSHA
5	35876106	.	C	T	1	nonsynonymous SNV	IL7R
5	38481977	.	A	G	1	nonsynonymous SNV	LIFR
5	38506614	.	A	G	1	nonsynonymous SNV	LIFR
5	55236965	rs191125510	A	G	1	nonsynonymous SNV	IL6ST
5	55250787	rs140433866	G	C	1	nonsynonymous SNV	IL6ST
5	55250812	rs199939306	G	A	1	nonsynonymous SNV	IL6ST
5	55256305	rs141500365	G	A	1	nonsynonymous SNV	IL6ST
5	131325108	.	G	C	1	nonsynonymous SNV	ACSL6
5	132270084	rs141402018	G	C	1	nonsynonymous SNV	AFF4
5	132270213	.	C	T	1	nonsynonymous SNV	AFF4
5	142283163	.	A	G	1	nonsynonymous SNV	ARHGAP26
5	142435633	.	A	G	1	nonsynonymous SNV	ARHGAP26
5	159507745	.	C	G	1	nonsynonymous SNV	PWWP2A
5	170736622	rs34255055	G	T	2	nonsynonymous SNV	TLX3
5	176520411	.	C	G	1	nonsynonymous SNV	FGFR4
5	176520442	rs75935301	C	A	1	nonsynonymous SNV	FGFR4
5	180052965	rs367879842	G	A	1	nonsynonymous SNV	FLT4
5	180052980	.	C	T	1	nonsynonymous SNV	FLT4
6	18237656	.	G	A	1	nonsynonymous SNV	DEK
6	27107158	.	G	A	1	nonsynonymous SNV	HIST1H4I
6	28872280	rs141241395	C	T	1	nonsynonymous SNV	TRIM27
6	28876852	rs761203448	T	C	1	nonsynonymous SNV	TRIM27
6	31133820	rs1489249310	T	C	1	nonsynonymous SNV	POU5F1
6	41652493	rs201604256	G	T	1	nonsynonymous SNV	TFEB
6	93955064	rs151105732	G	A	1	nonsynonymous SNV	EPHA7
6	93965644	.	G	C	1	nonsynonymous SNV	EPHA7
6	93967903	rs146203229	T	G	1	nonsynonymous SNV	EPHA7
6	127471694	.	A	G	1	nonsynonymous SNV	RSPO3
6	136590612	.	T	C	2	nonsynonymous SNV	BCLAF1
6	136597579	.	T	C	1	nonsynonymous SNV	BCLAF1
6	136599533	rs1347270658	C	G	1	nonsynonymous SNV	BCLAF1
6	139164200	rs184795504	C	T	2	nonsynonymous SNV	ECT2L
6	139164278	rs1286271280	G	A	1	nonsynonymous SNV	ECT2L
6	139175261	rs372903555	G	A	1	nonsynonymous SNV	ECT2L
6	139206647	.	G	A	1	nonsynonymous SNV	ECT2L
6	139206872	rs79865247	G	A	1	nonsynonymous SNV	ECT2L
6	139206888	rs199701983	C	T	1	nonsynonymous SNV	ECT2L
6	139222224	rs200833857	C	T	1	nonsynonymous SNV	ECT2L
6	139223664	rs374898524	G	A	1	nonsynonymous SNV	ECT2L
6	150005117	rs56348064	G	A	1	nonsynonymous SNV	LATS1
6	159191861	rs374945393	C	T	1	nonsynonymous SNV	EZR
6	167417243	.	CTTCAGTTTTT	C	1	frameshift deletion	FGFR1OP
6	167424317	.	C	T	1	nonsynonymous SNV	FGFR1OP
7	20180673	rs141024206	T	A	1	nonsynonymous SNV	MACC1
7	20198446	rs367950914	C	A	2	nonsynonymous SNV	MACC1
7	20198693	.	G	C	1	nonsynonymous SNV	MACC1
7	27204512	rs140596580	G	T	1	nonsynonymous SNV	HOXA9
7	27224368	rs143812636	C	G	1	nonsynonymous SNV	HOXA11
7	27239135	.	G	T	1	nonsynonymous SNV	HOXA13
7	27872466	rs143697346	A	G	3	nonsynonymous SNV	JAZF1
7	37947175	rs147145122	G	T	2	nonsynonymous SNV	SFRP4
7	37953841	rs149860855	G	A	2	nonsynonymous SNV	SFRP4
7	37956049	.	T	C	1	nonsynonymous SNV	SFRP4
7	86469016	.	A	C	1	nonsynonymous SNV	GRM3
7	91603087	.	A	T	1	nonsynonymous SNV	AKAP9
7	91630255	.	GA	G	1	frameshift deletion	AKAP9
7	91641932	.	C	T	1	stopgain	AKAP9
7	91643610	rs139965373	G	A	1	nonsynonymous SNV	AKAP9
7	91667736	rs150379637	A	G	1	nonsynonymous SNV	AKAP9
7	91674405	rs150016098	T	C	1	nonsynonymous SNV	AKAP9
7	91694604	rs61757671	G	A	1	nonsynonymous SNV	AKAP9
7	91708791	.	GA	G	1	frameshift deletion	AKAP9
7	91726960	rs61757664	G	A	2	nonsynonymous SNV	AKAP9
7	91727479	rs139046510	A	T	2	nonsynonymous SNV	AKAP9
7	98478790	.	C	A	1	nonsynonymous SNV	TRRAP
7	98524978	.	C	G	1	nonsynonymous SNV	TRRAP
7	98547344	.	G	A	1	nonsynonymous SNV	TRRAP
7	98557019	rs1182687777	G	A	1	nonsynonymous SNV	TRRAP
7	98565248	rs904892331	G	A	1	nonsynonymous SNV	TRRAP
7	98567768	rs1396482116	A	G	1	nonsynonymous SNV	TRRAP
7	98569465	.	G	C	1	nonsynonymous SNV	TRRAP
7	98601827	rs201183421	G	A	1	nonsynonymous SNV	TRRAP
7	101840096	rs147066011	A	G	1	nonsynonymous SNV	CUX1
7	101840195	.	A	C	1	nonsynonymous SNV	CUX1
7	101840206	rs200925683	G	A	2	nonsynonymous SNV	CUX1
7	101840277	.	T	A	1	nonsynonymous SNV	CUX1
7	101845455	rs560189390	G	A	1	nonsynonymous SNV	CUX1
7	101925163	.	G	C	1	nonsynonymous SNV	CUX1
7	127721448	rs1219037625	G	A	1	nonsynonymous SNV	SND1
7	137565269	.	T	C	1	nonsynonymous SNV	CREB3L2
7	137597812	.	A	G	1	nonsynonymous SNV	CREB3L2
7	138522877	rs946825291	G	A	1	nonsynonymous SNV	KIAA1549
7	138537008	rs902568442	T	C	1	nonsynonymous SNV	KIAA1549
7	138552852	.	T	C	1	nonsynonymous SNV	KIAA1549
7	138552872	rs572540609	G	A	1	nonsynonymous SNV	KIAA1549
7	143053713	rs143238060	C	T	2	nonsynonymous SNV	FAM131B
7	143054028	rs74932743	T	C	1	nonsynonymous SNV	FAM131B
7	147674954	rs147532036	G	C	1	nonsynonymous SNV	CNTNAP2
7	148080827	rs571404876	G	A	1	nonsynonymous SNV	CNTNAP2
8	1824809	rs144004435	C	T	1	nonsynonymous SNV	ARHGEF10
8	1871748	rs146766107	G	A	1	nonsynonymous SNV	ARHGEF10
8	1876804	rs35925274	C	T	1	nonsynonymous SNV	ARHGEF10
8	17797566	rs377606947	G	A	1		PCM1
8	17797633	.	A	G	1		PCM1
8	17804695	rs140481840	G	A	1	nonsynonymous SNV	PCM1
8	17812999	rs557994502	G	A	1	nonsynonymous SNV	PCM1
8	17819588	rs1272767267	C	T	1	nonsynonymous SNV	PCM1
8	17843002	rs1034547799	T	G	1	nonsynonymous SNV	PCM1
8	17883107	rs761221628	G	A	1	nonsynonymous SNV	PCM1
8	29961860	.	C	T	1	nonsynonymous SNV	LEPROTL1
8	32406255	rs868078016	G	A	1	nonsynonymous SNV	NRG1
8	32617879	rs540140464	C	A	1	nonsynonymous SNV	NRG1
8	32621637	rs80189821	C	T	1	nonsynonymous SNV	NRG1
8	41542151	rs141408004	A	C	7	nonsynonymous SNV	ANK1
8	41547827	rs145562489	G	A	2	nonsynonymous SNV	ANK1
8	41548021	rs113948846	G	A	4	nonsynonymous SNV	ANK1
8	41550261	rs148275567	G	A	1	nonsynonymous SNV	ANK1
8	41552202	rs368279119	C	T	1	nonsynonymous SNV	ANK1
8	41561560	rs185448932	G	A	1	nonsynonymous SNV	ANK1
8	41575677	rs142626656	G	A	2	nonsynonymous SNV	ANK1
8	41577289	rs147608206	C	T	1	nonsynonymous SNV	ANK1
8	41790087	.	A	G	1	nonsynonymous SNV	KAT6A
8	41790132	.	G	A	1	nonsynonymous SNV	KAT6A
8	41798556	rs200762586	C	T	3	nonsynonymous SNV	KAT6A
8	41801377	.	T	C	1	nonsynonymous SNV	KAT6A
8	41906291	.	T	C	1	nonsynonymous SNV	KAT6A
8	42819530	.	A	G	1	nonsynonymous SNV	HOOK3
8	42823322	rs139710426	G	A	2	nonsynonymous SNV	HOOK3
8	42868518	rs971624319	A	C	1	nonsynonymous SNV	HOOK3
8	54900676	rs200590980	C	G	1	nonsynonymous SNV	TCEA1
8	57079094	rs1160345224	G	C	1	nonsynonymous SNV	PLAG1
8	57080027	rs77315395	T	A	5	nonsynonymous SNV	PLAG1
8	68930127	rs139905707	A	G	1	nonsynonymous SNV	PREX2
8	68956816	rs11784582	G	A	2	nonsynonymous SNV	PREX2
8	68992692	rs529924687	G	A	1	nonsynonymous SNV	PREX2
8	69020561	.	A	G	1	nonsynonymous SNV	PREX2
8	69033204	rs146939492	G	A	3	nonsynonymous SNV	PREX2
8	69046434	rs183882933	G	A	2	nonsynonymous SNV	PREX2
8	71033566	rs61754973	T	C	1	nonsynonymous SNV	NCOA2
8	71036267	.	C	T	1	nonsynonymous SNV	NCOA2
8	71039122	rs61754972	C	T	1	nonsynonymous SNV	NCOA2
8	71041031	rs189421236	A	G	1	nonsynonymous SNV	NCOA2
8	71044134	rs1292841322	G	A	1	nonsynonymous SNV	NCOA2
8	71126147	.	T	C	1	nonsynonymous SNV	NCOA2
8	87878793	.	C	G	1	nonsynonymous SNV	CNBD1
8	88363940	rs200357055	C	A	1	nonsynonymous SNV	CNBD1
8	93017346	rs200143453	G	A	2	synonymous SNV	RUNX1T1
8	93088195	rs77385137	T	C	1	nonsynonymous SNV	RUNX1T1
8	93088222	rs144423229	C	T	2	nonsynonymous SNV	RUNX1T1
8	93107649	.	A	G	1	nonsynonymous SNV	RUNX1T1
8	95143202	.	G	A	1	nonsynonymous SNV	CDH17
8	95164124	rs201712089	C	A	1	nonsynonymous SNV	CDH17
8	95172234	.	G	C	1	nonsynonymous SNV	CDH17
8	113256661	.	G	C	1	nonsynonymous SNV	CSMD3
8	113364697	rs139786530	T	C	3	nonsynonymous SNV	CSMD3
8	113402924	.	T	G	1	nonsynonymous SNV	CSMD3
8	113504810	rs61754527	G	A	13	nonsynonymous SNV	CSMD3
8	113697919	.	A	T	1	nonsynonymous SNV	CSMD3
8	113988123	.	G	T	1	nonsynonymous SNV	CSMD3
8	114111109	.	C	A	1	nonsynonymous SNV	CSMD3
8	117864868	.	T	G	1	nonsynonymous SNV	RAD21
8	117866558	.	AC	A	1	frameshift deletion	RAD21
8	139190806	.	T	G	1	nonsynonymous SNV	FAM135B
9	8484269	.	C	A	1	nonsynonymous SNV	PTPRD
9	8486232	rs142397137	C	G	1	nonsynonymous SNV	PTPRD
9	8486247	rs139171396	C	T	1	nonsynonymous SNV	PTPRD
9	8499805	rs150444130	C	A	7	nonsynonymous SNV	PTPRD
9	8500886	.	G	A	1	nonsynonymous SNV	PTPRD
9	15478478	.	T	C	1	nonsynonymous SNV	PSIP1
9	20363474	rs149399304	C	T	1	nonsynonymous SNV	MLLT3
9	102590524	rs573092297	GCAA	G	2	nonframeshift deletion	NR4A3
9	102609807	.	G	T	1	nonsynonymous SNV	NR4A3
9	102626092	.	C	A	1	nonsynonymous SNV	NR4A3
9	110249605	rs914464265	T	C	1	nonsynonymous SNV	KLF4
9	110249659	.	C	A	1	nonsynonymous SNV	KLF4
9	110249816	rs139237114	G	A	1	nonsynonymous SNV	KLF4
9	117810706	rs145720474	G	A	1	nonsynonymous SNV	TNC
9	117819452	.	A	G	1	nonsynonymous SNV	TNC
9	117819629	.	G	A	1	nonsynonymous SNV	TNC
9	117826953	.	G	GT	1	frameshift insertion	TNC
9	117835900	rs139280264	G	A	4	nonsynonymous SNV	TNC
9	117840315	rs200401362	C	G	1	nonsynonymous SNV	TNC
9	117846676	rs55643605	C	T	1	nonsynonymous SNV	TNC
9	117848470	rs189249722	C	T	1	nonsynonymous SNV	TNC
9	117848751	rs1373637122	T	A	1	nonsynonymous SNV	TNC
9	117849499	rs117058692	C	G	1	nonsynonymous SNV	TNC
9	117852975	rs151119387	C	T	1	nonsynonymous SNV	TNC
9	123858819	.	T	G	1	nonsynonymous SNV	CNTRL
9	123880790	rs144178223	A	T	4	nonsynonymous SNV	CNTRL
9	123914959	.	G	T	1	nonsynonymous SNV	CNTRL
9	123917145	rs144738756	G	C	5	nonsynonymous SNV	CNTRL
9	123920272	.	T	C	1	nonsynonymous SNV	CNTRL
9	123924546	rs140745627	A	G	1	nonsynonymous SNV	CNTRL
9	123937353	rs557741511	C	G	2	nonsynonymous SNV	CNTRL
9	134004820	rs141418879	T	C	1	nonsynonymous SNV	NUP214
9	134008519	.	T	C	1	nonsynonymous SNV	NUP214
9	134026117	.	C	T	1	nonsynonymous SNV	NUP214
9	134050955	rs140412899	C	T	1	nonsynonymous SNV	NUP214
9	134072879	.	G	GT	1	frameshift insertion	NUP214
9	135973982	.	T	C	1	nonsynonymous SNV	RALGDS
9	136031455	.	G	A	1		RALGDS
10	875350	rs144611807	G	A	1	nonsynonymous SNV	LARP4B
10	8100728	rs199565632	C	G	1	nonsynonymous SNV	GATA3
10	8115898	.	T	C	1	nonsynonymous SNV	GATA3
10	21906135	rs146946726	A	G	6	nonsynonymous SNV	MLLT10
10	22015195	rs181699146	C	T	1	nonsynonymous SNV	MLLT10
10	22015240	rs202106072	C	T	1	nonsynonymous SNV	MLLT10
10	22019855	rs142554860	G	A	7	nonsynonymous SNV	MLLT10
10	27037641	.	T	A	1	nonsynonymous SNV	ABI1
10	27044667	rs143322305	G	A	1	nonsynonymous SNV	ABI1
10	27066073	rs145810798	G	A	1	nonsynonymous SNV	ABI1
10	27149767	.	T	A	1	nonsynonymous SNV	ABI1
10	31809579	rs1432181026	A	G	1	nonsynonymous SNV	ZEB1
10	31810679	rs141194628	A	G	5	nonsynonymous SNV	ZEB1
10	31812927	rs143370284	A	C	2	nonsynonymous SNV	ZEB1
10	31815644	rs1267931152	C	T	1	nonsynonymous SNV	ZEB1
10	32306230	.	G	A	1	stopgain	KIF5B
10	32322960	rs182324493	G	A	1	nonsynonymous SNV	KIF5B
10	51580923	.	C	T	1	nonsynonymous SNV	NCOA4
10	52575837	.	G	C	1	nonsynonymous SNV	A1CF
10	61552762	rs575393361	C	CGGAGGT	2	nonframeshift insertion	CCDC6
10	70404656	.	G	A	1	nonsynonymous SNV	TET1
10	70405053	rs199602262	C	A	1	nonsynonymous SNV	TET1
10	70451518	.	G	A	1	nonsynonymous SNV	TET1
10	72357817	rs768505698	C	T	1	nonsynonymous SNV	PRF1
10	76748798	.	T	C	1	nonsynonymous SNV	KAT6B
10	76789368	.	C	A	1	nonsynonymous SNV	KAT6B
10	76789417	rs72803461	G	A	3	nonsynonymous SNV	KAT6B
10	93999812	.	G	A	1	nonsynonymous SNV	CPEB3
10	96798795	rs143386810	C	T	3	nonsynonymous SNV	CYP2C8
10	96824654	.	A	C	1	nonsynonymous SNV	CYP2C8
10	96827394	.	C	T	1	nonsynonymous SNV	CYP2C8
10	96829148	rs1207535747	AAAAGG	A	1	frameshift deletion	CYP2C8
10	104858719	rs116066839	A	G	1	nonsynonymous SNV	NT5C2
10	104860821	.	T	C	1	nonsynonymous SNV	NT5C2
10	114220336	.	G	T	2	stopgain	VTI1A
10	114224379	rs142137912	G	A	1	nonsynonymous SNV	VTI1A
10	114428735	.	A	T	1	nonsynonymous SNV	VTI1A
10	131334530	rs536098805	G	A	1	nonsynonymous SNV	MGMT
11	3028171	rs187175475	A	T	1	nonsynonymous SNV	CARS
11	3060432	rs558009289	C	T	2	nonsynonymous SNV	CARS
11	3060507	rs149387799	G	A	1	nonsynonymous SNV	CARS
11	3062130	rs200923551	C	T	1	nonsynonymous SNV	CARS
11	3716782	rs144659895	C	T	2	nonsynonymous SNV	NUP98
11	3721942	rs144628791	C	T	1	nonsynonymous SNV	NUP98
11	3723730	rs148101240	C	T	1	nonsynonymous SNV	NUP98
11	8252033	.	A	G	1	nonsynonymous SNV	LMO1
11	46299714	rs1384561178	A	G	1	nonsynonymous SNV	CREB3L1
11	46321561	rs542539617	G	C	1	nonsynonymous SNV	CREB3L1
11	46321657	rs200839792	G	A	1	nonsynonymous SNV	CREB3L1
11	46321667	rs190038304	C	T	1	nonsynonymous SNV	CREB3L1
11	46338958	.	G	C	1	nonsynonymous SNV	CREB3L1
11	57427232	rs200951285	A	G	1	nonsynonymous SNV	CLP1
11	57561543	rs76817459	A	G	2	nonsynonymous SNV	CTNND1
11	57563049	rs61754546	G	A	1	nonsynonymous SNV	CTNND1
11	57564350	rs201654277	G	T	1	nonsynonymous SNV	CTNND1
11	57571209	rs199990235	A	G	3	nonsynonymous SNV	CTNND1
11	57573934	rs200943999	T	G	1	nonsynonymous SNV	CTNND1
11	57577619	rs556628331	T	C	1	nonsynonymous SNV	CTNND1
11	57577625	.	A	G	1	nonsynonymous SNV	CTNND1
11	61563607	.	G	C	1	nonsynonymous SNV	FEN1
11	71715042	.	G	C	1	nonsynonymous SNV	NUMA1
11	71715733	rs35681270	G	A	1	nonsynonymous SNV	NUMA1
11	71717179	.	T	C	1	nonsynonymous SNV	NUMA1
11	71718414	rs200233406	G	A	1	nonsynonymous SNV	NUMA1
11	71725857	.	G	A	1	nonsynonymous SNV	NUMA1
11	71726379	rs138657430	T	C	1	nonsynonymous SNV	NUMA1
11	71726438	.	A	G	1	nonsynonymous SNV	NUMA1
11	71726622	rs149446307	G	A	1	nonsynonymous SNV	NUMA1
11	71729276	rs139359161	G	A	2	nonsynonymous SNV	NUMA1
11	85701307	rs117411388	T	C	1	nonsynonymous SNV	PICALM
11	85726006	rs779752380	C	T	1	synonymous SNV	PICALM
11	85779721	rs146840505	G	C	3	nonsynonymous SNV	PICALM
11	92085402	.	C	T	1	nonsynonymous SNV	FAT3
11	92085978	.	G	C	1	nonsynonymous SNV	FAT3
11	92086866	.	A	C	1	nonsynonymous SNV	FAT3
11	92088192	rs146432830	C	T	1	nonsynonymous SNV	FAT3
11	92088196	.	A	G	1	nonsynonymous SNV	FAT3
11	92257830	rs143194286	G	A	2	nonsynonymous SNV	FAT3
11	92531088	.	T	A	1	nonsynonymous SNV	FAT3
11	92532207	rs1302145611	C	A	1	nonsynonymous SNV	FAT3
11	92533495	rs149993900	G	A	2	nonsynonymous SNV	FAT3
11	92533558	rs200944979	G	A	1	nonsynonymous SNV	FAT3
11	92533594	.	C	G	1	nonsynonymous SNV	FAT3
11	92534008	.	G	A	1	nonsynonymous SNV	FAT3
11	92534332	.	C	G	1	nonsynonymous SNV	FAT3
11	92538454	rs112113306	C	T	1	nonsynonymous SNV	FAT3
11	92569867	rs200404766	C	T	3	nonsynonymous SNV	FAT3
11	92573727	.	G	A	1	splice_acceptor	FAT3
11	92577352	rs200032318	G	A	5	nonsynonymous SNV	FAT3
11	92600166	.	C	T	1	nonsynonymous SNV	FAT3
11	92613978	rs201379307	G	A	3	nonsynonymous SNV	FAT3
11	92616305	rs1440801357	C	T	1	nonsynonymous SNV	FAT3
11	92622404	.	A	G	1		FAT3
11	92622409	.	A	G	1		FAT3
11	92623839	.	G	C	1	nonsynonymous SNV	FAT3
11	95825609	.	A	G	1	nonsynonymous SNV	MAML2
11	95826052	rs201509772	C	A	1	nonsynonymous SNV	MAML2
11	96074983	rs200971316	C	G	4	nonsynonymous SNV	MAML2
11	117015018	rs1226648766	G	T	1		PAFAH1B2
11	118342679	.	A	G	1	nonsynonymous SNV	KMT2A
11	118344839	rs139989306	C	T	2	nonsynonymous SNV	KMT2A
11	118352500	.	G	T	1	nonsynonymous SNV	KMT2A
11	118352798	.	C	T	1	nonsynonymous SNV	KMT2A
11	118354908	.	C	T	1	nonsynonymous SNV	KMT2A
11	118362528	rs143317202	G	A	1	nonsynonymous SNV	KMT2A
11	118366570	.	C	T	1	nonsynonymous SNV	KMT2A
11	118376329	.	G	C	1	nonsynonymous SNV	KMT2A
11	118771588	rs1328845797	G	A	1	nonsynonymous SNV	BCL9L
11	118771714	rs574321228	C	T	1	nonsynonymous SNV	BCL9L
11	118771957	rs183804575	G	A	2	nonsynonymous SNV	BCL9L
11	118772287	rs144029087	A	G	1	nonsynonymous SNV	BCL9L
11	118772401	.	A	G	1	nonsynonymous SNV	BCL9L
11	118851324	.	C	A	1	nonsynonymous SNV	FOXR1
11	120298916	rs147982337	C	T	1	nonsynonymous SNV	ARHGEF12
11	120317731	rs138160103	G	A	1	nonsynonymous SNV	ARHGEF12
11	120339997	rs926350763	A	C	1	nonsynonymous SNV	ARHGEF12
11	120351131	rs202128571	G	A	1	nonsynonymous SNV	ARHGEF12
11	120352041	.	T	C	1	nonsynonymous SNV	ARHGEF12
11	120352133	rs1223461838	T	C	1	nonsynonymous SNV	ARHGEF12
11	128651868	.	A	G	1	nonsynonymous SNV	FLI1
12	406289	.	CT	C	1	frameshift deletion	KDM5A
12	427428	rs373590748	G	A	1	nonsynonymous SNV	KDM5A
12	461384	rs201675393	T	C	4	nonsynonymous SNV	KDM5A
12	1553736	.	G	GC	1	frameshift insertion	ERC1
12	22814013	.	C	T	1	nonsynonymous SNV	ETNK1
12	27803022	.	C	T	1	nonsynonymous SNV	PPFIBP1
12	27832479	.	C	T	1	nonsynonymous SNV	PPFIBP1
12	27841260	rs138941072	G	C	1	nonsynonymous SNV	PPFIBP1
12	27841297	rs1212882704	G	A	1	nonsynonymous SNV	PPFIBP1
12	46205208	rs140285438	G	A	3	nonsynonymous SNV	ARID2
12	46205284	.	C	A	1	nonsynonymous SNV	ARID2
12	46244152	rs138384363	C	T	1	nonsynonymous SNV	ARID2
12	46244160	rs376582344	C	A	1	nonsynonymous SNV	ARID2
12	46287238	rs201845936	G	A	1	nonsynonymous SNV	ARID2
12	46298141	.	TG	T	1		ARID2
12	48368604	.	C	A	1	nonsynonymous SNV	COL2A1
12	48391456	.	G	C	1	nonsynonymous SNV	COL2A1
12	50026641	rs199502695	C	T	4	nonsynonymous SNV	PRPF40B
12	50027247	rs146358365	C	T	1	nonsynonymous SNV	PRPF40B
12	50028330	.	T	C	1	nonsynonymous SNV	PRPF40B
12	50036051	.	C	T	1	nonsynonymous SNV	PRPF40B
12	51189710	.	A	G	1	nonsynonymous SNV	ATF1
12	51203291	rs146613889	G	A	1	nonsynonymous SNV	ATF1
12	51208120	rs532503300	T	C	1	nonsynonymous SNV	ATF1
12	54369154	.	G	T	1	nonsynonymous SNV	HOXC11
12	57109814	.	G	A	1	nonsynonymous SNV	NACA
12	57112947	rs746403095	G	T	1		NACA
12	57114979	.	G	A	1	nonsynonymous SNV	NACA
12	57859444	.	G	T	1	nonsynonymous SNV	GLI1
12	57859678	.	G	T	1	nonsynonymous SNV	GLI1
12	57863483	.	T	C	1	splice_donor	GLI1
12	57864118	rs200306754	G	A	1	nonsynonymous SNV	GLI1
12	57864873	.	C	T	1	nonsynonymous SNV	GLI1
12	57864923	.	C	G	1	stopgain	GLI1
12	57865189	.	C	A	1	nonsynonymous SNV	GLI1
12	57910920	.	G	A	1	nonsynonymous SNV	DDIT3
12	59274410	rs200549484	T	C	1	nonsynonymous SNV	LRIG3
12	59274506	rs142306271	C	T	1	nonsynonymous SNV	LRIG3
12	59280632	rs138577440	T	C	2	nonsynonymous SNV	LRIG3
12	59281583	rs201662008	C	T	2	nonsynonymous SNV	LRIG3
12	65445246	.	G	T	1	stopgain	WIF1
12	65514824	.	C	G	1	nonsynonymous SNV	WIF1
12	70949062	rs112145681	C	T	2	nonsynonymous SNV	PTPRB
12	70965009	rs149998223	G	A	4	nonsynonymous SNV	PTPRB
12	70965620	.	T	G	1	nonsynonymous SNV	PTPRB
12	70988331	.	G	T	1	nonsynonymous SNV	PTPRB
12	95914962	rs144760209	T	C	2	nonsynonymous SNV	USP44
12	95918558	rs372529431	C	T	1	nonsynonymous SNV	USP44
12	95926643	rs568865924	C	T	1	nonsynonymous SNV	USP44
12	95926960	rs562591075	C	T	1	nonsynonymous SNV	USP44
12	95927735	rs187355417	G	A	1	nonsynonymous SNV	USP44
12	95927782	rs141219097	T	C	1	nonsynonymous SNV	USP44
12	121426662	.	T	C	1	nonsynonymous SNV	HNF1A
12	122762715	.	C	T	1	nonsynonymous SNV	CLIP1
12	122825299	rs144240398	C	A	1	splice_donor	CLIP1
12	122845621	.	C	G	1	nonsynonymous SNV	CLIP1
12	122958526	rs150057798	G	A	6	nonsynonymous SNV	ZCCHC8
12	124812003	.	G	A	1	nonsynonymous SNV	NCOR2
12	124816999	.	T	C	1	nonsynonymous SNV	NCOR2
12	124824561	rs200853446	G	A	1	nonsynonymous SNV	NCOR2
12	124832860	rs372325371	C	A	1	nonsynonymous SNV	NCOR2
12	124835208	rs199979566	G	A	2	nonsynonymous SNV	NCOR2
12	124835279	rs200297509	G	A	2	nonsynonymous SNV	NCOR2
13	20567721	.	G	A	1	nonsynonymous SNV	ZMYM2
13	20567907	.	T	G	1	nonsynonymous SNV	ZMYM2
13	20605511	rs187724961	T	C	1	nonsynonymous SNV	ZMYM2
13	20625636	rs953697486	G	A	1	nonsynonymous SNV	ZMYM2
13	21565434	rs45453992	C	T	1	nonsynonymous SNV	LATS2
13	28537449	rs553066746	ACTT	A	1	nonframeshift deletion	CDX2
13	28539033	rs773759361	C	A	1	nonsynonymous SNV	CDX2
13	35619160	.	G	A	1	nonsynonymous SNV	NBEA
13	35619533	.	G	A	1	nonsynonymous SNV	NBEA
13	35733825	.	G	A	1	nonsynonymous SNV	NBEA
13	35734141	rs193066744	G	A	5	nonsynonymous SNV	NBEA
13	35735887	.	G	A	1	nonsynonymous SNV	NBEA
13	35745410	rs201205330	C	T	4	nonsynonymous SNV	NBEA
13	35770201	rs561239166	G	A	1	nonsynonymous SNV	NBEA
13	36124683	.	C	T	1	nonsynonymous SNV	NBEA
13	36125129	.	C	T	1	nonsynonymous SNV	NBEA
13	46726923	rs138605281	C	T	2	nonsynonymous SNV	LCP1
13	92101123	rs142381235	C	T	2	nonsynonymous SNV	GPC5
13	92345530	rs369076704	G	C	1	nonsynonymous SNV	GPC5
14	32560869	.	A	G	1	nonsynonymous SNV	ARHGAP5
14	32561218	rs1169657706	A	T	1	nonsynonymous SNV	ARHGAP5
14	32561923	rs141134108	C	T	1	nonsynonymous SNV	ARHGAP5
14	32563165	rs147527447	C	A	1	nonsynonymous SNV	ARHGAP5
14	35222823	.	C	G	1	nonsynonymous SNV	BAZ1A
14	35249505	rs867509502	C	T	1	nonsynonymous SNV	BAZ1A
14	38064109	rs139801655	C	G	1	nonsynonymous SNV	FOXA1
14	51196272	.	T	C	1	nonsynonymous SNV	NIN
14	56079248	rs529619703	C	T	1	nonsynonymous SNV	KTN1
14	56085984	.	A	G	1	nonsynonymous SNV	KTN1
14	56117065	rs45460501	A	G	2	nonsynonymous SNV	KTN1
14	61113130	rs766975120	C	G	2	nonsynonymous SNV	SIX1
14	61115513	.	T	C	1	nonsynonymous SNV	SIX1
14	62187212	rs61755705	G	C	4	nonsynonymous SNV	HIF1A
14	62187244	.	G	T	1	nonsynonymous SNV	HIF1A
14	62203643	rs202183359	A	T	1	nonsynonymous SNV	HIF1A
14	66975271	rs150226537	C	G	3	nonsynonymous SNV	GPHN
14	67589070	.	T	C	1	nonsynonymous SNV	GPHN
14	68301887	.	G	C	1	nonsynonymous SNV	RAD51B
14	68331831	.	A	G	1	nonsynonymous SNV	RAD51B
14	68331840	rs200741476	G	A	2	nonsynonymous SNV	RAD51B
14	81557483	rs141293178	A	T	1	nonsynonymous SNV	TSHR
14	81562992	.	C	A	1	stopgain	TSHR
14	81610339	.	C	G	1	stopgain	TSHR
14	92441008	rs141259390	G	A	2	nonsynonymous SNV	TRIP11
14	99642125	rs1283850331	G	A	1	nonsynonymous SNV	BCL11B
14	99724042	.	A	C	1	nonsynonymous SNV	BCL11B
14	102552634	.	G	A	1	stopgain	HSP90AA1
15	34643024	rs141497257	T	C	1	nonsynonymous SNV	NUTM1
15	34646655	.	C	T	1	nonsynonymous SNV	NUTM1
15	50788250	.	C	A	1	nonsynonymous SNV	USP8
15	52622673	rs147898420	G	A	2	nonsynonymous SNV	MYO5A
15	52632542	.	C	T	1	nonsynonymous SNV	MYO5A
15	52643465	rs777833837	C	T	1	nonsynonymous SNV	MYO5A
15	52643591	.	C	T	1	nonsynonymous SNV	MYO5A
15	52656782	.	T	C	1	nonsynonymous SNV	MYO5A
15	52662445	rs200975586	C	T	1	nonsynonymous SNV	MYO5A
15	52662499	rs1005760412	G	A	1	nonsynonymous SNV	MYO5A
15	55710427	rs534357896	A	G	1	nonsynonymous SNV	C15orf65
15	57545569	rs1402162756	A	G	1	nonsynonymous SNV	TCF12
15	57554367	rs953764180	A	G	1	nonsynonymous SNV	TCF12
15	74315485	rs140050477	C	T	3	nonsynonymous SNV	PML
15	74337119	.	G	A	1	nonsynonymous SNV	PML
15	89862296	rs181860632	G	A	1	nonsynonymous SNV	POLG
15	89866693	rs138457939	T	C	1	nonsynonymous SNV	POLG
15	89868870	rs113994096	G	A	5	nonsynonymous SNV	POLG
15	89873337	rs138929605	T	A	1	nonsynonymous SNV	POLG
15	89876490	.	G	T	1	nonsynonymous SNV	POLG
15	89876658	rs139599587	G	A	1	nonsynonymous SNV	POLG
15	91145559	rs147681624	G	A	1	nonsynonymous SNV	CRTC3
15	91147652	rs145024567	G	A	3	nonsynonymous SNV	CRTC3
15	91181748	.	C	A	1	nonsynonymous SNV	CRTC3
15	91184404	rs150890712	G	A	1	nonsynonymous SNV	CRTC3
15	91428312	rs1457673376	C	T	1	nonsynonymous SNV	FES
15	91436013	rs141708381	C	T	1	nonsynonymous SNV	FES
16	339473	.	A	T	1	nonsynonymous SNV	AXIN1
16	2096239	rs150766139	G	A	2	stopgain	NTHL1
16	2222227	.	G	C	1	nonsynonymous SNV	TRAF7
16	9857107	.	C	T	1	nonsynonymous SNV	GRIN2A
16	9857574	rs145063086	G	C	1	nonsynonymous SNV	GRIN2A
16	9857761	.	A	G	1	nonsynonymous SNV	GRIN2A
16	9923476	.	G	C	1	nonsynonymous SNV	GRIN2A
16	12492338	.	G	T	1	nonsynonymous SNV	SNX29
16	15808909	.	C	G	1	nonsynonymous SNV	MYH11
16	15814758	.	C	G	1	nonsynonymous SNV	MYH11
16	15814814	rs111854563	G	A	2	nonsynonymous SNV	MYH11
16	15814883	rs137934837	C	T	6	nonsynonymous SNV	MYH11
16	15818143	rs112467954	C	T	3	nonsynonymous SNV	MYH11
16	15818262	rs1401689647	G	A	1	nonsynonymous SNV	MYH11
16	15818780	rs7196804	C	T	2	nonsynonymous SNV	MYH11
16	15844048	rs111404182	G	A	1	nonsynonymous SNV	MYH11
16	15872688	rs150759461	G	A	1	nonsynonymous SNV	MYH11
16	24166176	rs369508594	A	T	1	nonsynonymous SNV	PRKCB
16	27455970	rs201566028	G	C	1	nonsynonymous SNV	IL21R
16	27460521	rs267604484	G	A	1	nonsynonymous SNV	IL21R
16	31202326	.	A	C	1	nonsynonymous SNV	FUS
16	64984724	.	C	T	1	nonsynonymous SNV	CDH11
16	67070552	.	C	G	1	nonsynonymous SNV	CBFB
16	72822288	.	G	A	1	nonsynonymous SNV	ZFHX3
16	72822351	rs62639993	G	A	2	nonsynonymous SNV	ZFHX3
16	72828009	rs185694644	C	T	1	nonsynonymous SNV	ZFHX3
16	72828629	rs1324649054	T	G	1	nonsynonymous SNV	ZFHX3
16	72828890	rs141564201	T	C	1	nonsynonymous SNV	ZFHX3
16	72831132	rs148334947	C	A	7	nonsynonymous SNV	ZFHX3
16	72831151	rs181054801	G	T	2	nonsynonymous SNV	ZFHX3
16	72831278	.	T	C	1	nonsynonymous SNV	ZFHX3
16	72831629	rs117283459	G	A	3	nonsynonymous SNV	ZFHX3
16	72991376	.	C	A	1	nonsynonymous SNV	ZFHX3
16	72991395	rs148618101	C	G	1	nonsynonymous SNV	ZFHX3
16	72992045	rs544260229	G	A	2	nonsynonymous SNV	ZFHX3
16	72992378	rs147016640	G	C	2	nonsynonymous SNV	ZFHX3
16	74670264	.	G	A	1	nonsynonymous SNV	RFWD3
16	88947187	rs150852720	C	T	1	nonsynonymous SNV	CBFA2T3
16	88947740	rs200173287	C	T	1	nonsynonymous SNV	CBFA2T3
16	88947826	.	C	G	1	nonsynonymous SNV	CBFA2T3
16	88952423	rs143704547	G	T	1	nonsynonymous SNV	CBFA2T3
16	88952424	rs561624190	A	C	1	nonsynonymous SNV	CBFA2T3
16	88967923	rs143043820	G	A	1	nonsynonymous SNV	CBFA2T3
17	1257610	.	C	T	1	nonsynonymous SNV	YWHAE
17	5064855	rs143126839	C	T	2	nonsynonymous SNV	USP6
17	5253852	.	C	G	1	nonsynonymous SNV	RABEP1
17	5264884	rs558415422	G	A	1	nonsynonymous SNV	RABEP1
17	8044417	.	G	C	1	nonsynonymous SNV	PER1
17	8045136	rs145053802	G	A	1	nonsynonymous SNV	PER1
17	8045629	rs1266421656	T	C	1	nonsynonymous SNV	PER1
17	8045714	rs112743620	C	T,A	2	nonsynonymous SNV	PER1
17	8045714	rs112743620	C	T,A	2	nonsynonymous SNV	PER1
17	8052595	rs140853060	G	C	3	nonsynonymous SNV	PER1
17	8053861	rs150803032	T	C	1	nonsynonymous SNV	PER1
17	9829968	rs545557656	G	A	1	nonsynonymous SNV	GAS7
17	20107762	rs35489815	A	C	1	nonsynonymous SNV	SPECC1
17	20108476	rs202164673	T	A	1	nonsynonymous SNV	SPECC1
17	20108795	rs377027470	G	A	1	nonsynonymous SNV	SPECC1
17	20163540	rs201980094	G	A	1	nonsynonymous SNV	SPECC1
17	30264461	rs199728576	G	A	1	nonsynonymous SNV	SUZ12
17	30325838	rs139363631	C	T	3	nonsynonymous SNV	SUZ12
17	30325868	rs557229254	A	G	1	nonsynonymous SNV	SUZ12
17	34171111	.	T	C	1	nonsynonymous SNV	TAF15
17	36875772	.	C	A	1	nonsynonymous SNV	MLLT6
17	47688677	.	C	T	1	nonsynonymous SNV	SPOP
17	47875800	rs374961973	G	A	1	nonsynonymous SNV	KAT7
17	48263206	rs147266928	T	C	1	nonsynonymous SNV	COL1A1
17	48270048	rs113950465	C	T	1	nonsynonymous SNV	COL1A1
17	55752446	rs145489286	G	A	1	nonsynonymous SNV	MSI2
17	57759018	.	A	G	1	nonsynonymous SNV	CLTC
17	57763076	.	G	T	1	nonsynonymous SNV	CLTC
17	58725415	.	A	G	1	nonsynonymous SNV	PPM1D
17	62500193	.	G	C	1	nonsynonymous SNV	DDX5
17	73775231	.	G	T	1	nonsynonymous SNV	H3F3B
17	74732530	.	G	A	1	nonsynonymous SNV	SRSF2
17	76989693	rs544902800	C	G	1	nonsynonymous SNV	CANT1
17	76989775	rs145516713	C	T	5	nonsynonymous SNV	CANT1
17	78311449	rs368850066	C	T	1	nonsynonymous SNV	RNF213
17	78311637	.	C	T	1	nonsynonymous SNV	RNF213
17	78313946	.	G	T	1	nonsynonymous SNV	RNF213
17	78313951	rs181142554	G	A	1	nonsynonymous SNV	RNF213
17	78319718	rs202143169	G	A	1	nonsynonymous SNV	RNF213
17	78328364	rs200217989	C	T	1	nonsynonymous SNV	RNF213
17	78348466	.	ATGATGCAGGGTGATGGACCAC	A	1		RNF213
17	78355462	rs141301945	C	T	3	nonsynonymous SNV	RNF213
17	78363852	.	T	C	1	nonsynonymous SNV	RNF213
17	79967904	rs556931297	G	GC	3		ASPSCR1
18	22805073	rs114102095	G	C	1	nonsynonymous SNV	ZNF521
18	22805282	rs1048517256	T	G	1	nonsynonymous SNV	ZNF521
18	22806533	rs138606013	T	C	1	nonsynonymous SNV	ZNF521
18	22806966	rs150250688	C	T	3	nonsynonymous SNV	ZNF521
18	22806981	rs114155230	C	T	3	nonsynonymous SNV	ZNF521
18	23615004	rs147146752	C	A	5	nonsynonymous SNV	SS18
18	50589797	.	G	A	1	nonsynonymous SNV	DCC
18	50592476	.	G	A	1	nonsynonymous SNV	DCC
18	50592531	rs144623089	A	G	3	nonsynonymous SNV	DCC
18	50832030	rs369809232	C	T	1	nonsynonymous SNV	DCC
18	56414962	.	C	G	1	stopgain	MALT1
18	61022498	rs1449404392	A	G	1	nonsynonymous SNV	KDSR
19	4365515	rs868490265	G	A	1	nonsynonymous SNV	SH3GL1
19	6222523	rs1286763401	T	C	1	nonsynonymous SNV	MLLT1
19	6222610	rs143656133	C	T	2	nonsynonymous SNV	MLLT1
19	8993450	rs796290489	A	C	1	nonsynonymous SNV	MUC16
19	8997119	rs145435147	T	C	2	nonsynonymous SNV	MUC16
19	9038416	.	C	A	1	splice_acceptor	MUC16
19	9057564	.	CT	C	1	frameshift deletion	MUC16
19	9057667	.	G	A	1	stopgain	MUC16
19	9064630	.	TG	T	2	frameshift deletion	MUC16
19	9067923	.	G	GT	1	frameshift insertion	MUC16
19	9087935	.	TTG	T	1	frameshift deletion	MUC16
19	10599900	.	A	G	1	nonsynonymous SNV	KEAP1
19	10600042	.	C	A	1	nonsynonymous SNV	KEAP1
19	10602344	rs147613351	G	A	1	nonsynonymous SNV	KEAP1
19	10610439	rs202181679	C	T	3	nonsynonymous SNV	KEAP1
19	10935776	.	A	AC	1	frameshift insertion	DNM2
19	13054760	rs201689726	G	A	1		CALR
19	14204604	.	C	T	1	nonsynonymous SNV	PRKACA
19	14626895	rs143320658	G	A	1	nonsynonymous SNV	DNAJB1
19	14627495	.	G	C	1	nonsynonymous SNV	DNAJB1
19	14627718	.	G	A	1	stopgain	DNAJB1
19	14629019	rs199815171	A	G	1	nonsynonymous SNV	DNAJB1
19	18555641	.	T	G	1	nonsynonymous SNV	ELL
19	18557592	rs151228060	G	C	5	nonsynonymous SNV	ELL
19	18876306	rs138875847	C	T	8	nonsynonymous SNV	CRTC1
19	33372856	rs45470694	C	A	1	stopgain	CEP89
19	34687596	rs199997804	G	A	2	nonsynonymous SNV	LSM14A
19	34706139	.	C	T	1	nonsynonymous SNV	LSM14A
19	34712530	.	G	A	1	nonsynonymous SNV	LSM14A
19	34712587	rs149275422	C	A	1	nonsynonymous SNV	LSM14A
19	34712631	.	T	G	1	nonsynonymous SNV	LSM14A
19	42788885	rs1342527965	C	T	1	nonsynonymous SNV	CIC
19	42795144	rs201439084	C	T	1	nonsynonymous SNV	CIC
19	42796573	rs555135145	T	C	1	nonsynonymous SNV	CIC
19	42796955	rs149948572	C	T	1	nonsynonymous SNV	CIC
19	51378085	rs139063242	G	A	6	nonsynonymous SNV	KLK2
19	52714517	rs950558629	C	T	1	nonsynonymous SNV	PPP2R1A
19	52716236	rs945817997	C	T	1	nonsynonymous SNV	PPP2R1A
20	1918051	rs527874912	C	T	1	nonsynonymous SNV	SIRPA
20	20018017	.	G	A	1	nonsynonymous SNV	CRNKL1
20	20026029	rs112980877	C	T	4	nonsynonymous SNV	CRNKL1
20	39704855	.	C	T	1	nonsynonymous SNV	TOP1
20	39794408	.	G	A	1	nonsynonymous SNV	PLCG1
20	39796561	.	A	G	1	nonsynonymous SNV	PLCG1
20	39802595	.	A	T	1	nonsynonymous SNV	PLCG1
20	39802920	.	C	A	1	nonsynonymous SNV	PLCG1
20	40713385	rs180871064	C	T	1	nonsynonymous SNV	PTPRT
20	40733305	rs201162919	G	T	2	nonsynonymous SNV	PTPRT
20	40944545	rs200852571	G	A	1	nonsynonymous SNV	PTPRT
20	41101050	rs192944843	C	T	2	nonsynonymous SNV	PTPRT
20	41419894	.	T	C	1	nonsynonymous SNV	PTPRT
20	43955989	rs145789563	C	T	1	nonsynonymous SNV	SDC4
20	50048830	rs139027658	C	T	3	nonsynonymous SNV	NFATC2
20	50049203	rs1047594592	T	C	1	nonsynonymous SNV	NFATC2
20	50140590	.	C	A	1	nonsynonymous SNV	NFATC2
20	50407179	.	C	T	1	nonsynonymous SNV	SALL4
20	50407735	rs143818932	A	C	2	nonsynonymous SNV	SALL4
20	62164907	rs553979804	G	A	1	stopgain	PTK6
20	62165009	.	C	T	1	nonsynonymous SNV	PTK6
21	44513271	rs140932020	C	T	1	nonsynonymous SNV	U2AF1
22	19171074	rs527763206;rs375471950	C	CT	2	frameshift insertion	CLTCL1
22	19175143	rs201296558	G	A	1	nonsynonymous SNV	CLTCL1
22	19175213	rs55790642	C	T	1	nonsynonymous SNV	CLTCL1
22	19184010	rs556579608	T	C	1	nonsynonymous SNV	CLTCL1
22	19209588	.	A	C	1	nonsynonymous SNV	CLTCL1
22	19211467	rs181639433	T	A	5	nonsynonymous SNV	CLTCL1
22	19222211	rs199652160	C	T	2	nonsynonymous SNV	CLTCL1
22	19226874	rs147685377	T	C	10	nonsynonymous SNV	CLTCL1
22	19241669	rs371582873	C	G	1	nonsynonymous SNV	CLTCL1
22	20073836	.	A	G	1	nonsynonymous SNV	DGCR8
22	20073919	rs118025402	C	T	1	nonsynonymous SNV	DGCR8
22	20097585	rs148884257	C	T	1	nonsynonymous SNV	DGCR8
22	28193077	rs1266340952	G	A	1	nonsynonymous SNV	MN1
22	28193317	rs1159987506	G	T	1	nonsynonymous SNV	MN1
22	28196476	rs200030766	C	T	2	nonsynonymous SNV	MN1
22	31722884	rs144494015	C	T	2	nonsynonymous SNV	PATZ1
22	35478513	.	G	T	1	stopgain	ISX
22	35478663	rs149896833	G	A	3	splice_donor	ISX
22	36681953	.	C	G	1	nonsynonymous SNV	MYH9
22	36682873	rs142094977	A	G	4	nonsynonymous SNV	MYH9
22	36685292	rs139134727	G	A	6	nonsynonymous SNV	MYH9
22	36689909	rs141582478	C	T	1	nonsynonymous SNV	MYH9
22	36696191	rs199520053	C	G	1	nonsynonymous SNV	MYH9
22	36696921	.	C	G	1	nonsynonymous SNV	MYH9
22	36745275	rs56200894	G	C	7	nonsynonymous SNV	MYH9
22	39629493	rs190122588	C	T	1	nonsynonymous SNV	PDGFB
X	44920638	.	T	G	1	nonsynonymous SNV	KDM6A
X	47039858	.	T	A	1	nonsynonymous SNV	RBM10
X	48649629	rs372131208	C	T	1	nonsynonymous SNV	GATA1
X	63412766	rs146489129	T	G	2	nonsynonymous SNV	AMER1
X	123224518	.	C	G	1	nonsynonymous SNV	STAG2
X	129156896	.	G	A	1	nonsynonymous SNV	BCORL1
X	129159223	.	A	G	1	nonsynonymous SNV	BCORL1
X	152807810	rs62642960	A	C	1	nonsynonymous SNV	ATP2B3
X	152815594	.	T	C	1	nonsynonymous SNV	ATP2B3
X	152826218	.	C	T	1	nonsynonymous SNV	ATP2B3
X	153590073	.	T	A	1	nonsynonymous SNV	FLNA
X	153599586	.	G	A	1	stopgain	FLNA
X	153629244	rs782769153	C	G	1	stopgain	RPL10
